# Supplementary material for: Identification of Impacted Pathways and Transcriptomic Markers as Potential Mediators of Pulmonary Fibrosis in Transgenic Mice Expressing Human IGFBP5
Source: MDPI journal article supplement (doi:10.3390/ijms222212609), 2021-11-22

**Supp. Table S1:**DEGs in the comparison of pFBs of hIGFBP5 HOMO mice vs. WT mice. The q-value cut off is 0.05, upregulated genes have a log2FC above 0.6 (red), and downregulated genes have a log2FC below -0.6 (blue).

| ENTREZID  | SYMBOL        | GENENAME                                                                                    | log2FC   | q-value  |
|-----------|---------------|---------------------------------------------------------------------------------------------|----------|----------|
| 69327     | 1700007K13Rik | RIKEN cDNA 1700007K13 gene                                                                  | -3.21503 | 1.00E-06 |
| 69771     | 1810019D21Rik | RIKEN cDNA 1810019D21 gene                                                                  | 1.729901 | 1.00E-06 |
| 100503178 | 2810013P06Rik | RIKEN cDNA 2810013P06 gene                                                                  | 1.130656 | 1.00E-06 |
| 212448    | 9330159F19Rik | RIKEN cDNA 9330159F19 gene                                                                  | 4.97115  | 1.00E-06 |
| 105518    | A630023A22Rik | RIKEN cDNA A630023A22 gene                                                                  | 4.57982  | 1.00E-06 |
| 217262    | Abca9         | ATP-binding cassette, sub-family A (ABC1), member 9                                         | 2.480624 | 1.00E-06 |
| 26874     | Abcd2         | ATP-binding cassette, sub-family D (ALD), member 2                                          | 1.627179 | 1.00E-06 |
| 26897     | Acot1         | acyl-CoA thioesterase 1                                                                     | 4.087376 | 1.00E-06 |
| 75572     | Acyp2         | acylphosphatase 2, muscle type                                                              | -2.24159 | 1.00E-06 |
| 101401    | Adamts9       | a disintegrin-like and metallopeptidase (reprolysin type) with thrombospondin type 1 motifs | 2.187029 | 1.00E-06 |
| 11517     | Adcyap1r1     | adenylate cyclase activating polypeptide 1 receptor 1                                       | -4.98107 | 1.00E-06 |
| 11535     | Adm           | adrenomedullin                                                                              | -2.92002 | 1.00E-06 |
| 11541     | Adora2b       | adenosine A2b receptor                                                                      | -1.14349 | 1.00E-06 |
| 347722    | Agap1         | ArfGAP with GTPase domain, ankyrin repeat and PH domain 1                                   | 1.218362 | 1.00E-06 |
| 216439    | Agap2         | ArfGAP with GTPase domain, ankyrin repeat and PH domain 2                                   | 2.018622 | 1.00E-06 |
| 99542     | Al115009      | expressed sequence Al115009                                                                 | 2.230915 | 1.00E-06 |
| 104103    | Airn          | antisense Igf2r RNA                                                                         | 2.841077 | 1.00E-06 |
| 19378     | Aldh1a2       | aldehyde dehydrogenase family 1, subfamily A2                                               | -7.93283 | 1.00E-06 |
| 67689     | Aldh3b1       | aldehyde dehydrogenase 3 family, member B1                                                  | -1.26799 | 1.00E-06 |
| 11647     | Alpl          | alkaline phosphatase, liver/bone/kidney                                                     | 6.010524 | 1.00E-06 |
| 216285    | Alx1          | ALX homeobox 1                                                                              | 10       | 1.00E-06 |
| 11694     | Alx3          | aristaless-like homeobox 3                                                                  | 6.88089  | 1.00E-06 |
| 72125     | Amer2         | APC membrane recruitment 2                                                                  | 7.478975 | 1.00E-06 |
| 56332     | Amotl2        | angiomotin-like 2                                                                           | 1.164482 | 1.00E-06 |
| 11601     | Angpt2        | angiopoietin 2                                                                              | -4.79579 | 1.00E-06 |
| 11735     | Ank3          | ankyrin 3, epithelial                                                                       | 2.243212 | 1.00E-06 |
| 239029    | Antxr1        | anthrax toxin receptor-like                                                                 | 4.553982 | 1.00E-06 |
| 71724     | Aox3          | aldehyde oxidase 3                                                                          | 4.077598 | 1.00E-06 |
| 11767     | Ap1m1         | adaptor-related protein complex AP-1, mu subunit 1                                          | 0.762951 | 1.00E-06 |
| 23805     | Apc2          | APC regulator of WNT signaling pathway 2                                                    | 1.240659 | 1.00E-06 |
| 11810     | Apobec1       | apolipoprotein B mRNA editing enzyme, catalytic polypeptide 1                               | -1.93455 | 1.00E-06 |
| 71939     | Apol6         | apolipoprotein L 6                                                                          | -2.82524 | 1.00E-06 |
| 231532    | Arhgap24      | Rho GTPase activating protein 24                                                            | -1.92818 | 1.00E-06 |
| 65255     | Asb4          | ankyrin repeat and SOCS box-containing 4                                                    | 3.420319 | 1.00E-06 |
| 171209    | Asic3         | acid-sensing (proton-gated) ion channel 3                                                   | 7.19144  | 1.00E-06 |
| 11980     | Atp8a1        | ATPase, aminophospholipid transporter (APLT), class I, type 8A, n                           | 2.658955 | 1.00E-06 |
| 97440     | B3gnt9        | UDP-GlcNAc:betaGal beta-1,3-N-acetylglucosaminyltransferase 9                               | 1.427867 | 1.00E-06 |
| 407788    | BC051142      | cDNA sequence BC051142                                                                      | 2.450536 | 1.00E-06 |
| 666938    | Bend4         | BEN domain containing 4                                                                     | 1.453006 | 1.00E-06 |
| 209645    | Bend7         | BEN domain containing 7                                                                     | 4.379363 | 1.00E-06 |
| 171543    | Bmf           | BCL2 modifying factor                                                                       | 3.020578 | 1.00E-06 |
| 606736    | C920009B18Rik | RIKEN cDNA C920009B18 gene                                                                  | -4.644   | 1.00E-06 |
| 94332     | Cadm3         | cell adhesion molecule 3                                                                    | 4.540186 | 1.00E-06 |
| 71962     | Castor1       | cytosolic arginine sensor for mTORC1 subunit 1                                              | -1.5538  | 1.00E-06 |
| 69743     | Cas21         | castor zinc finger 1                                                                        | 3.531966 | 1.00E-06 |
| 12391     | Cav3          | caveolin 3                                                                                  | -7.1638  | 1.00E-06 |
| 208650    | Cblb          | Casitas B-lineage lymphoma b                                                                | 1.624852 | 1.00E-06 |
| 211535    | Ccdc114       | coiled-coil domain containing 114                                                           | 2.934604 | 1.00E-06 |
| 68339     | Ccdc88c       | coiled-coil domain containing 88C                                                           | 4.401195 | 1.00E-06 |
| 12476     | Cd151         | CD151 antigen                                                                               | -1.32233 | 1.00E-06 |
| 12490     | Cd34          | CD34 antigen                                                                                | 3.293119 | 1.00E-06 |
| 12519     | Cd80          | CD80 antigen                                                                                | -2.43319 | 1.00E-06 |
| 12560     | Cdh3          | cadherin 3                                                                                  | 3.902583 | 1.00E-06 |
| 68567     | Cgref1        | cell growth regulator with EF hand domain 1                                                 | -2.61237 | 1.00E-06 |
| 73368     | Col20a1       | collagen, type XX, alpha 1                                                                  | 3.216978 | 1.00E-06 |
| 373864    | Col27a1       | collagen, type XXVII, alpha 1                                                               | 3.200703 | 1.00E-06 |
| 71883     | Coq2          | coenzyme Q2 4-hydroxybenzoate polyprenyltransferase                                         | -0.96403 | 1.00E-06 |
| 12873     | Cpa3          | carboxypeptidase A3, mast cell                                                              | -4.11462 | 1.00E-06 |
| 231207    | Cpeb2         | cytoplasmic polyadenylation element binding protein 2                                       | -1.45612 | 1.00E-06 |
| 68337     | Crip2         | cysteine rich protein 2                                                                     | -3.25918 | 1.00E-06 |
| 11630     | Crybg1        | crystallin beta-gamma domain containing 1                                                   | 5.198011 | 1.00E-06 |
| 12977     | Csf1          | colony stimulating factor 1 (macrophage)                                                    | -1.39783 | 1.00E-06 |
| 13052     | Cxadr         | coxsackie virus and adenovirus receptor                                                     | 3.058938 | 1.00E-06 |
| 225912    | Cyb561a3      | cytochrome b561 family, member A3                                                           | 1.891033 | 1.00E-06 |
| 76884     | Cyfp2         | cytoplasmic FMR1 interacting protein 2                                                      | -2.3634  | 1.00E-06 |
| 76441     | Daam2         | dishevelled associated activator of morphogenesis 2                                         | 3.319541 | 1.00E-06 |
| 13175     | Dclk1         | doublecortin-like kinase 1                                                                  | -2.55876 | 1.00E-06 |
| 23853     | Def6          | differentially expressed in FDCP 6                                                          | 1.260418 | 1.00E-06 |
| 13380     | Dkk1          | dickkopf WNT signaling pathway inhibitor 1                                                  | 6.280353 | 1.00E-06 |
| 13394     | Dlx4          | distal-less homeobox 4                                                                      | 4.051417 | 1.00E-06 |
| 320453    | Dlx4os        | distal-less homeobox 4, opposite strand                                                     | 4.879153 | 1.00E-06 |

|           |               |                                                                    |          |          |
|-----------|---------------|--------------------------------------------------------------------|----------|----------|
| 226049    | Dmrt2         | doublesex and mab-3 related transcription factor 2                 | 5.635167 | 1.00E-06 |
| 65254     | Dpysl5        | dihydropyrimidinase-like 5                                         | 3.741822 | 1.00E-06 |
| 70433     | Draxin        | dorsal inhibitory axon guidance protein                            | 6.080463 | 1.00E-06 |
| 252864    | Dusp15        | dual specificity phosphatase-like 15                               | -3.64229 | 1.00E-06 |
| 18218     | Dusp8         | dual specificity phosphatase 8                                     | -1.54965 | 1.00E-06 |
| 13593     | Ebf3          | early B cell factor 3                                              | 7.349607 | 1.00E-06 |
| 13638     | Efna3         | ephrin A3                                                          | -2.51485 | 1.00E-06 |
| 68519     | Eml1          | echinoderm microtubule associated protein like 1                   | -1.14436 | 1.00E-06 |
| 319670    | Eml5          | echinoderm microtubule associated protein like 5                   | 3.726453 | 1.00E-06 |
| 13824     | Epb41l4a      | erythrocyte membrane protein band 4.1 like 4a                      | 3.134186 | 1.00E-06 |
| 13835     | Epha1         | Eph receptor A1                                                    | 1.431394 | 1.00E-06 |
| 208618    | Etl4          | enhancer trap locus 4                                              | -2.74878 | 1.00E-06 |
| 74190     | Exoc3l4       | exocyst complex component 3-like 4                                 | 2.817812 | 1.00E-06 |
| 320051    | Exph5         | exophilin 5                                                        | 4.282103 | 1.00E-06 |
| 104943    | Fam110c       | family with sequence similarity 110, member C                      | 2.366946 | 1.00E-06 |
| 629059    | Fam124a       | family with sequence similarity 124, member A                      | -3.51256 | 1.00E-06 |
| 224093    | Fam43a        | family with sequence similarity 43, member A                       | -1.3445  | 1.00E-06 |
| 14102     | Fas           | Fas (TNF receptor superfamily member 6)                            | -1.61862 | 1.00E-06 |
| 329628    | Fat4          | FAT atypical cadherin 4                                            | -1.12073 | 1.00E-06 |
| 14119     | Fbn2          | fibrillin 2                                                        | 7.341607 | 1.00E-06 |
| 72179     | Fbxl2         | F-box and leucine-rich repeat protein 2                            | -1.46074 | 1.00E-06 |
| 69754     | Fbxo7         | F-box protein 7                                                    | 0.988006 | 1.00E-06 |
| 225020    | Fez2          | fasciculation and elongation protein zeta 2 (zyglin II)            | -1.07537 | 1.00E-06 |
| 14200     | Fhl2          | four and a half LIM domains 2                                      | -2.41517 | 1.00E-06 |
| 67606     | Fibin         | fin bud initiation factor homolog (zebrafish)                      | -3.02103 | 1.00E-06 |
| 217721    | Flvcr2        | feline leukemia virus subgroup C cellular receptor 2               | 2.739376 | 1.00E-06 |
| 14241     | Foxl1         | forkhead box L1                                                    | -5.43142 | 1.00E-06 |
| 114142    | Foxp2         | forkhead box P2                                                    | 2.252153 | 1.00E-06 |
| 209630    | Frm4a         | FERM domain containing 4A                                          | -1.77417 | 1.00E-06 |
| 232288    | Frm4b         | FERM domain containing 4B                                          | 3.4949   | 1.00E-06 |
| 228564    | Frm5          | FERM domain containing 5                                           | -3.64772 | 1.00E-06 |
| 320027    | Fstl4         | folliculin-like 4                                                  | 3.498285 | 1.00E-06 |
| 14368     | Fzd6          | frizzled class receptor 6                                          | 1.32009  | 1.00E-06 |
| 14388     | Gab1          | growth factor receptor bound protein 2-associated protein 1        | 1.6039   | 1.00E-06 |
| 69976     | Galk2         | galactokinase 2                                                    | -0.76715 | 1.00E-06 |
| 14463     | Gata4         | GATA binding protein 4                                             | 4.688043 | 1.00E-06 |
| 67092     | Gatm          | glycine amidinotransferase (L-arginine:glycine amidinotransferase) | 5.337731 | 1.00E-06 |
| 71584     | Gdpd2         | glycerophosphodiester phosphodiesterase domain containing 2        | 4.811738 | 1.00E-06 |
| 317758    | Gimap9        | GTPase, IMAP family member 9                                       | 2.52043  | 1.00E-06 |
| 14633     | Gli2          | GLI-Kruppel family member GLI2                                     | 1.332855 | 1.00E-06 |
| 73690     | Glipr1        | GLI pathogenesis-related 1 (glioma)                                | -5.69418 | 1.00E-06 |
| 30926     | Glrx3         | glutaredoxin 3                                                     | -1.17296 | 1.00E-06 |
| 100041694 | Gm10451       | predicted gene 10451                                               | 6.232733 | 1.00E-06 |
| 433801    | Gm13212       | predicted gene 13212                                               | -2.78796 | 1.00E-06 |
| 100642166 | Gm15446       | predicted gene 15446                                               | -8.63024 | 1.00E-06 |
| 100862072 | Gm21451       | predicted gene, 21451                                              | -8.07047 | 1.00E-06 |
| 102636330 | Gm26878       | predicted gene, 26878                                              | 6.932998 | 1.00E-06 |
| 102631856 | Gm30083       | predicted gene, 30083                                              | 4.426302 | 1.00E-06 |
| 115487375 | Gm48826       | sentrin-specific protease 2 pseudogene                             | 4.534674 | 1.00E-06 |
| 384808    | Gm5345        | glyceraldehyde-3-phosphate dehydrogenase pseudogene                | 2.625313 | 1.00E-06 |
| 432839    | Gprin2        | G protein regulated inducer of neurite outgrowth 2                 | 3.559547 | 1.00E-06 |
| 108682    | Gpt2          | glutamic pyruvate transaminase (alanine aminotransferase) 2        | 1.206239 | 1.00E-06 |
| 235283    | Gramd1b       | GRAM domain containing 1B                                          | 0.915144 | 1.00E-06 |
| 74053     | Grip1         | glutamate receptor interacting protein 1                           | 6.172341 | 1.00E-06 |
| 14773     | Grk5          | G protein-coupled receptor kinase 5                                | -1.42196 | 1.00E-06 |
| 68312     | Gstm7         | glutathione S-transferase, mu 7                                    | -3.12499 | 1.00E-06 |
| 14910     | Gt(ROSA)26Sor | gene trap ROSA 26, Philippe Soriano                                | -2.60766 | 1.00E-06 |
| 27357     | Gyg           | glycogenin                                                         | -3.11916 | 1.00E-06 |
| 15117     | Has2          | hyaluronan synthase 2                                              | 4.336998 | 1.00E-06 |
| 74318     | Hopx          | HOP homeobox                                                       | 3.097405 | 1.00E-06 |
| 15413     | Hoxb5         | homeobox B5                                                        | -3.10543 | 1.00E-06 |
| 75395     | Hoxb5os       | homeobox B5 and homeobox B6, opposite strand                       | -2.89694 | 1.00E-06 |
| 15414     | Hoxb6         | homeobox B6                                                        | -3.46616 | 1.00E-06 |
| 15415     | Hoxb7         | homeobox B7                                                        | -3.12592 | 1.00E-06 |
| 15416     | Hoxb8         | homeobox B8                                                        | -2.67267 | 1.00E-06 |
| 15417     | Hoxb9         | homeobox B9                                                        | -2.18476 | 1.00E-06 |
| 15423     | Hoxc4         | homeobox C4                                                        | 3.765692 | 1.00E-06 |
| 15439     | Hp            | haptoglobin                                                        | 3.350652 | 1.00E-06 |
| 15452     | Hprt          | hypoxanthine guanine phosphoribosyl transferase                    | -0.98479 | 1.00E-06 |
| 29818     | Hspb7         | heat shock protein family, member 7 (cardiovascular)               | -3.38303 | 1.00E-06 |
| 330723    | Htra4         | Htra serine peptidase 4                                            | -4.3817  | 1.00E-06 |
| 15894     | Icam1         | intercellular adhesion molecule 1                                  | -2.99443 | 1.00E-06 |
| 15951     | Ifi204        | interferon activated gene 204                                      | 2.353406 | 1.00E-06 |
| 15957     | Ifi1          | interferon-induced protein with tetratricopeptide repeats 1        | -2.06765 | 1.00E-06 |
| 16010     | Igfbp4        | insulin-like growth factor binding protein 4                       | -3.53895 | 1.00E-06 |

|           |              |                                                                |          |          |
|-----------|--------------|----------------------------------------------------------------|----------|----------|
| 29817     | Igfbp7       | insulin-like growth factor binding protein 7                   | -2.69352 | 1.00E-06 |
| 77125     | Il33         | interleukin 33                                                 | 2.856904 | 1.00E-06 |
| 16193     | Il6          | interleukin 6                                                  | -3.02126 | 1.00E-06 |
| 16373     | Inx3         | Iroquois related homeobox 3                                    | 3.831876 | 1.00E-06 |
| 100038882 | Isg15        | ISG15 ubiquitin-like modifier                                  | -4.42175 | 1.00E-06 |
| 16453     | Jak3         | Janus kinase 3                                                 | 1.18966  | 1.00E-06 |
| 17311     | Kitl         | kit ligand                                                     | 2.348019 | 1.00E-06 |
| 16598     | Klf2         | Kruppel-like factor 2 (lung)                                   | 2.036462 | 1.00E-06 |
| 213417    | Klhdc8a      | kelch domain containing 8A                                     | 3.60753  | 1.00E-06 |
| 67455     | Klhl13       | kelch-like 13                                                  | -2.92899 | 1.00E-06 |
| 75785     | Klhl24       | kelch-like 24                                                  | 2.360493 | 1.00E-06 |
| 16803     | Lbp          | lipopolysaccharide binding protein                             | 2.818916 | 1.00E-06 |
| 630994    | Lce3d        | late cornified envelope 3D                                     | 6.248267 | 1.00E-06 |
| 16859     | Lgals9       | lectin, galactose binding, soluble 9                           | -1.03793 | 1.00E-06 |
| 235402    | Lingo1       | leucine rich repeat and Ig domain containing 1                 | -3.31032 | 1.00E-06 |
| 30937     | Lmcd1        | LIM and cysteine-rich domains 1                                | -2.30687 | 1.00E-06 |
| 64899     | Lpin3        | lipin 3                                                        | -2.73015 | 1.00E-06 |
| 16956     | Lpl          | lipoprotein lipase                                             | 4.148286 | 1.00E-06 |
| 105005    | Lratd1       | LRAT domain containing 1                                       | 4.760055 | 1.00E-06 |
| 399603    | Lratd2       | LRAT domain containing 1                                       | 2.294514 | 1.00E-06 |
| 192976    | Lrrc75a      | leucine rich repeat containing 75A                             | -0.98225 | 1.00E-06 |
| 108075    | Ltbp4        | latent transforming growth factor beta binding protein 4       | 2.623699 | 1.00E-06 |
| 17085     | Ly9          | lymphocyte antigen 9                                           | -2.9918  | 1.00E-06 |
| 23936     | Lynx1        | Ly6/neurotoxin 1                                               | -1.828   | 1.00E-06 |
| 109731    | Maob         | monoamine oxidase B                                            | -2.70682 | 1.00E-06 |
| 224419    | Map3k7cl     | Map3k7 C-terminal like                                         | -2.03823 | 1.00E-06 |
| 338372    | Map3k9       | mitogen-activated protein kinase kinase kinase 9               | 4.078646 | 1.00E-06 |
| 29857     | Mapk12       | mitogen-activated protein kinase 12                            | 1.225163 | 1.00E-06 |
| 103537    | Mbtd1        | mbt domain containing 1                                        | 1.104418 | 1.00E-06 |
| 72039     | Mccc1        | methylcrotonoyl-Coenzyme A carboxylase 1 (alpha)               | 2.269862 | 1.00E-06 |
| 654424    | Mccc1os      | methylcrotonoyl-Coenzyme A carboxylase 1 (alpha), opposite str | 4.105825 | 1.00E-06 |
| 207911    | Mchr1        | melanin-concentrating hormone receptor 1                       | 3.739768 | 1.00E-06 |
| 75146     | Mfsd13a      | major facilitator superfamily domain containing 13a            | 1.759383 | 1.00E-06 |
| 98682     | Mfsd6        | major facilitator superfamily domain containing 6              | 0.968472 | 1.00E-06 |
| 17313     | Mgp          | matrix Gla protein                                             | -3.96695 | 1.00E-06 |
| 211666    | Mgst2        | microsomal glutathione S-transferase 2                         | 2.468429 | 1.00E-06 |
| 215708    | Miga1        | mitoguardin 1                                                  | 1.279454 | 1.00E-06 |
| 77037     | Mrap         | melanocortin 2 receptor accessory protein                      | 2.32464  | 1.00E-06 |
| 100040766 | Mroh2a       | maestro heat-like repeat family member 2A                      | 3.797998 | 1.00E-06 |
| 17701     | Msx1         | msh homeobox 1                                                 | 1.442794 | 1.00E-06 |
| 17919     | Myo5b        | myosin VB                                                      | 2.30853  | 1.00E-06 |
| 67111     | Naaa         | N-acylthanolamine acid amidase                                 | -1.45148 | 1.00E-06 |
| 635702    | Naaladl2     | N-acetylated alpha-linked acidic dipeptidase-like 2            | -3.28784 | 1.00E-06 |
| 18025     | Nfe2l3       | nuclear factor, erythroid derived 2, like 3                    | 1.792998 | 1.00E-06 |
| 18032     | Nfix         | nuclear factor I/X                                             | 0.945088 | 1.00E-06 |
| 215819    | Nhs1         | NHS-like 1                                                     | 1.723847 | 1.00E-06 |
| 70701     | Nipa1        | NIPA-like domain containing 1                                  | -4.69417 | 1.00E-06 |
| 268857    | Nlrc3        | NLR family, CARD domain containing 3                           | 2.247379 | 1.00E-06 |
| 434341    | Nlrc5        | NLR family, CARD domain containing 5                           | 1.785464 | 1.00E-06 |
| 74091     | Npl          | N-acetylneuraminate pyruvate lyase                             | 3.886489 | 1.00E-06 |
| 18162     | Npr3         | natriuretic peptide receptor 3                                 | -2.32993 | 1.00E-06 |
| 23959     | Nt5e         | 5' nucleotidase, ecto                                          | 2.667821 | 1.00E-06 |
| 277154    | Nynrin       | NYN domain and retroviral integrase containing                 | 1.384469 | 1.00E-06 |
| 246730    | Oas1a        | 2'-5' oligoadenylate synthetase 1A                             | -3.88346 | 1.00E-06 |
| 241327    | Olfml2a      | olfactomedin-like 2A                                           | 4.46896  | 1.00E-06 |
| 320078    | Olfml2b      | olfactomedin-like 2B                                           | 2.711587 | 1.00E-06 |
| 257871    | Olfrl372-ps1 | olfactory receptor 1372, pseudogene 1                          | 2.657295 | 1.00E-06 |
| 71839     | Osgin1       | oxidative stress induced growth inhibitor 1                    | 1.763516 | 1.00E-06 |
| 93711     | Pcdhga3      | protocadherin gamma subfamily A, 3                             | -2.94578 | 1.00E-06 |
| 93713     | Pcdhga5      | protocadherin gamma subfamily A, 5                             | 3.679903 | 1.00E-06 |
| 93700     | Pcdhgb2      | protocadherin gamma subfamily B, 2                             | -3.47823 | 1.00E-06 |
| 93702     | Pcdhgb5      | protocadherin gamma subfamily B, 5                             | -3.71672 | 1.00E-06 |
| 76073     | Pcgf5        | polycomb group ring finger 5                                   | -1.60452 | 1.00E-06 |
| 27273     | Pdk4         | pyruvate dehydrogenase kinase, isoenzyme 4                     | -1.83368 | 1.00E-06 |
| 54132     | Pdlim1       | PDZ and LIM domain 1 (elfin)                                   | -2.32931 | 1.00E-06 |
| 18631     | Pex11a       | peroxisomal biogenesis factor 11 alpha                         | 1.109615 | 1.00E-06 |
| 18645     | Pfn2         | profilin 2                                                     | -1.22006 | 1.00E-06 |
| 226041    | Pgm5         | phosphoglucomutase 5                                           | 2.603919 | 1.00E-06 |
| 69656     | Pir          | pirin                                                          | -1.04913 | 1.00E-06 |
| 18767     | Pkia         | protein kinase inhibitor, alpha                                | -2.42482 | 1.00E-06 |
| 74055     | Plice1       | phospholipase C, epsilon 1                                     | 3.2374   | 1.00E-06 |
| 240753    | Plekha6      | pleckstrin homology domain containing, family A member 6       | 4.204742 | 1.00E-06 |
| 211945    | Plekhh1      | pleckstrin homology domain containing, family H (with MyTH4 dr | 2.346548 | 1.00E-06 |
| 57435     | Plin4        | perilipin 4                                                    | -4.10899 | 1.00E-06 |
| 67784     | Plxnd1       | plexin D1                                                      | 1.262167 | 1.00E-06 |

|        |           |                                                                  |          |          |
|--------|-----------|------------------------------------------------------------------|----------|----------|
| 239157 | Pnma2     | paraneoplastic antigen MA2                                       | 2.537076 | 1.00E-06 |
| 53627  | Porcn     | porcupine O-acyltransferase                                      | 2.463476 | 1.00E-06 |
| 243725 | Ppp1r9a   | protein phosphatase 1, regulatory subunit 9A                     | 3.038106 | 1.00E-06 |
| 225518 | Prdm6     | PR domain containing 6                                           | -2.79271 | 1.00E-06 |
| 381148 | Probl1    | proline rich basic protein 1                                     | 2.275406 | 1.00E-06 |
| 19218  | Ptger3    | prostaglandin E receptor 3 (subtype EP3)                         | 3.903749 | 1.00E-06 |
| 218232 | Ptpdc1    | protein tyrosine phosphatase domain containing 1                 | -1.13949 | 1.00E-06 |
| 19273  | Ptpu      | protein tyrosine phosphatase, receptor type, U                   | 4.4728   | 1.00E-06 |
| 101631 | Pwmp2b    | PWWP domain containing 2B                                        | -1.76303 | 1.00E-06 |
| 67375  | Qprt      | quinolinate phosphoribosyltransferase                            | 7.468681 | 1.00E-06 |
| 67295  | Rab3c     | RAB3C, member RAS oncogene family                                | 4.805604 | 1.00E-06 |
| 217371 | Rab40b    | Rab40B, member RAS oncogene family                               | 1.684642 | 1.00E-06 |
| 19400  | Rapsn     | receptor-associated protein of the synapse                       | -3.79886 | 1.00E-06 |
| 246104 | Rhbdl3    | rhomboid like 3                                                  | 1.83092  | 1.00E-06 |
| 218215 | Rnf144b   | ring finger protein 144B                                         | 1.904146 | 1.00E-06 |
| 66922  | Rras2     | related RAS viral (r-ras) oncogene 2                             | -1.88309 | 1.00E-06 |
| 68585  | Rtn4      | reticulon 4                                                      | -0.85078 | 1.00E-06 |
| 269295 | Rtn4rl2   | reticulon 4 receptor-like 2                                      | 1.622597 | 1.00E-06 |
| 20192  | Ryr3      | ryanodine receptor 3                                             | 4.1222   | 1.00E-06 |
| 20230  | Satb1     | special AT-rich sequence binding protein 1                       | -3.89246 | 1.00E-06 |
| 20266  | Scn1b     | sodium channel, voltage-gated, type I, beta                      | -2.87929 | 1.00E-06 |
| 257635 | Sdsl      | serine dehydratase-like                                          | -2.61978 | 1.00E-06 |
| 20341  | Selenbp1  | selenium binding protein 1                                       | -2.0943  | 1.00E-06 |
| 20346  | Sema3a    | sema domain, immunoglobulin domain (Ig), short basic domain, s   | 1.867666 | 1.00E-06 |
| 20356  | Sema5a    | sema domain, seven thrombospondin repeats (type 1 and type 1     | 1.659545 | 1.00E-06 |
| 56526  | Septin6   | septin 6                                                         | 2.405361 | 1.00E-06 |
| 218442 | Serinc5   | serine incorporator 5                                            | 1.524778 | 1.00E-06 |
| 20716  | Serpina3n | serine (or cysteine) peptidase inhibitor, clade A, member 3N     | -2.40308 | 1.00E-06 |
| 20719  | Serpinb6a | serine (or cysteine) peptidase inhibitor, clade B, member 6a     | -1.28792 | 1.00E-06 |
| 20708  | Serpinb6b | serine (or cysteine) peptidase inhibitor, clade B, member 6b     | -3.96703 | 1.00E-06 |
| 20706  | Serpinb9b | serine (or cysteine) peptidase inhibitor, clade B, member 9b     | -4.03899 | 1.00E-06 |
| 18787  | Serpine1  | serine (or cysteine) peptidase inhibitor, clade E, member 1      | -2.51526 | 1.00E-06 |
| 56747  | Sez6l     | seizure related 6 homolog like                                   | 3.917174 | 1.00E-06 |
| 353282 | Sfmbt2    | Scm-like with four mbt domains 2                                 | 2.438633 | 1.00E-06 |
| 20377  | Sfrp1     | secreted frizzled-related protein 1                              | 2.940278 | 1.00E-06 |
| 20319  | Sfrp2     | secreted frizzled-related protein 2                              | 6.558425 | 1.00E-06 |
| 74442  | Sgms2     | sphingomyelin synthase 2                                         | -3.0012  | 1.00E-06 |
| 433323 | Sgpp2     | sphingosine-1-phosphate phosphatase 2                            | 6.477333 | 1.00E-06 |
| 27059  | Sh3d19    | SH3 domain protein D19                                           | 0.78386  | 1.00E-06 |
| 319278 | Shfl      | shiftless antiviral inhibitor of ribosomal frameshifting         | 2.452924 | 1.00E-06 |
| 330096 | Shisa3    | shisa family member 3                                            | 6.453001 | 1.00E-06 |
| 77552  | Shisa4    | shisa family member 4                                            | -1.35086 | 1.00E-06 |
| 110380 | Shroom2   | shroom family member 2                                           | 2.251542 | 1.00E-06 |
| 20465  | Sim2      | single-minded family bHLH transcription factor 2                 | 7.17005  | 1.00E-06 |
| 20501  | Slc16a1   | solute carrier family 16 (monocarboxylic acid transporters), mem | 2.540733 | 1.00E-06 |
| 20502  | Slc16a2   | solute carrier family 16 (monocarboxylic acid transporters), mem | 1.707299 | 1.00E-06 |
| 268512 | Slc26a11  | solute carrier family 26, member 11                              | 2.02778  | 1.00E-06 |
| 106957 | Slc39a6   | solute carrier family 39 (metal ion transporter), member 6       | -1.25727 | 1.00E-06 |
| 26941  | Slc9a3r1  | solute carrier family 9 (sodium/hydrogen exchanger), member 3    | 1.370874 | 1.00E-06 |
| 276829 | Smtnl2    | smoothelin-like 2                                                | 2.015587 | 1.00E-06 |
| 67847  | Snaip     | synuclein, alpha interacting protein (synphilin)                 | 3.340079 | 1.00E-06 |
| 268534 | Sntg2     | syntrophin, gamma 2                                              | 4.295191 | 1.00E-06 |
| 20657  | Sod3      | superoxide dismutase 3, extracellular                            | -3.91749 | 1.00E-06 |
| 20660  | Sorl1     | sortilin-related receptor, LDLR class A repeats-containing       | 3.15436  | 1.00E-06 |
| 245381 | Sowahd    | soosondawah ankyrin repeat domain family member D                | 4.075163 | 1.00E-06 |
| 219140 | Spta13    | spermatogenesis associated 13                                    | 4.071132 | 1.00E-06 |
| 217517 | Stxbp6    | syntaxin binding protein 6 (amisyn)                              | 3.827819 | 1.00E-06 |
| 68666  | Svop      | SV2 related protein                                              | -3.09749 | 1.00E-06 |
| 110058 | Syt17     | synaptotagmin XVII                                               | -1.3669  | 1.00E-06 |
| 54524  | Syt6      | synaptotagmin VI                                                 | 5.311007 | 1.00E-06 |
| 381605 | Tbc1d2    | TBC1 domain family, member 2                                     | -2.12425 | 1.00E-06 |
| 67016  | Tbc1d2b   | TBC1 domain family, member 2B                                    | 1.051717 | 1.00E-06 |
| 99681  | Tchh      | trichohyalin                                                     | -3.19093 | 1.00E-06 |
| 23965  | Tenm3     | teneurin transmembrane protein 3                                 | 3.115043 | 1.00E-06 |
| 74645  | Tent5c    | terminal nucleotidyltransferase 5C                               | 3.430098 | 1.00E-06 |
| 21808  | Tgfb2     | transforming growth factor, beta 2                               | -1.17791 | 1.00E-06 |
| 21824  | Thbd      | thrombomodulin                                                   | -3.54953 | 1.00E-06 |
| 21825  | Thbs1     | thrombospondin 1                                                 | -2.83627 | 1.00E-06 |
| 21826  | Thbs2     | thrombospondin 2                                                 | -1.39608 | 1.00E-06 |
| 94242  | Tinagl1   | tubulointerstitial nephritis antigen-like 1                      | -2.01079 | 1.00E-06 |
| 353499 | Tmc4      | transmembrane channel-like gene family 4                         | 1.713695 | 1.00E-06 |
| 73130  | Tmed5     | transmembrane p24 trafficking protein 5                          | -1.22401 | 1.00E-06 |
| 226040 | Tmem252   | transmembrane protein 252                                        | 3.103363 | 1.00E-06 |
| 633640 | Tmem267   | transmembrane protein 267                                        | -2.49087 | 1.00E-06 |
| 74122  | Tmem43    | transmembrane protein 43                                         | -0.80547 | 1.00E-06 |

|           |               |                                                                      |          |          |
|-----------|---------------|----------------------------------------------------------------------|----------|----------|
| 319939    | Tns3          | tensin 3                                                             | -1.5035  | 1.00E-06 |
| 217169    | Tns4          | tensin 4                                                             | -5.45295 | 1.00E-06 |
| 252838    | Tox           | thymocyte selection-associated high mobility group box               | 4.217884 | 1.00E-06 |
| 29807     | Tpk1          | thiamine pyrophosphokinase                                           | 2.422403 | 1.00E-06 |
| 100125263 | Trbc2         | T cell receptor beta, constant 2                                     | 4.143253 | 1.00E-06 |
| 209387    | Trim30d       | tripartite motif-containing 30D                                      | -1.55538 | 1.00E-06 |
| 56224     | Tspan5        | tetraspanin 5                                                        | -1.49047 | 1.00E-06 |
| 56844     | Tssc4         | tumor-suppressing subchromosomal transferable fragment 4             | -1.56591 | 1.00E-06 |
| 230603    | Ttc39a        | tetratricopeptide repeat domain 39A                                  | 3.234926 | 1.00E-06 |
| 105245    | Txndc5        | thioredoxin domain containing 5                                      | -1.28588 | 1.00E-06 |
| 226122    | Ubtd1         | ubiquitin domain containing 1                                        | -0.97272 | 1.00E-06 |
| 232334    | Vgll4         | vestigial like family member 4                                       | 1.279795 | 1.00E-06 |
| 22361     | Vnn1          | vanin 1                                                              | -2.17193 | 1.00E-06 |
| 232023    | Vopp1         | vesicular, overexpressed in cancer, prosurvival protein 1            | -1.50872 | 1.00E-06 |
| 72325     | Vps9d1        | VPS9 domain containing 1                                             | 0.85412  | 1.00E-06 |
| 245880    | Wasf3         | WASP family, member 3                                                | 2.04895  | 1.00E-06 |
| 22431     | Wt1           | Wilms tumor 1 homolog                                                | 3.368156 | 1.00E-06 |
| 22445     | Xlr3a         | X-linked lymphocyte-regulated 3A                                     | 6.823901 | 1.00E-06 |
| 230119    | Zbtb5         | zinc finger and BTB domain containing 5                              | 0.898018 | 1.00E-06 |
| 22640     | Zfp1          | zinc finger protein 1                                                | 1.606756 | 1.00E-06 |
| 22673     | Zfp185        | zinc finger protein 185                                              | 2.79647  | 1.00E-06 |
| 226442    | Zfp281        | zinc finger protein 281                                              | 1.117961 | 1.00E-06 |
| 545471    | Zfp345        | zinc finger protein 345                                              | 4.346177 | 1.00E-06 |
| 380912    | Zfp395        | zinc finger protein 395                                              | 1.919782 | 1.00E-06 |
| 382867    | Zfp488        | zinc finger protein 488                                              | 7.751988 | 1.00E-06 |
| 269023    | Zfp608        | zinc finger protein 608                                              | 1.335348 | 1.00E-06 |
| 622675    | Zfp827        | zinc finger protein 827                                              | 1.837058 | 1.00E-06 |
| 58894     | Zfp862-ps     | zinc finger protein 862, pseudogene                                  | 1.71846  | 1.00E-06 |
| 433791    | Zfp992        | zinc finger protein 992                                              | 2.130927 | 1.00E-06 |
| 74246     | Gale          | galactose-4-epimerase, UDP                                           | -1.58165 | 1.01E-06 |
| 12822     | Col18a1       | collagen, type XVIII, alpha 1                                        | -1.58437 | 1.02E-06 |
| 216395    | Rxylt1        | ribitol xylosyltransferase 1                                         | -0.90937 | 1.03E-06 |
| 26432     | Plod2         | procollagen lysine, 2-oxoglutarate 5-dioxygenase 2                   | -1.73861 | 1.06E-06 |
| 26386     | Hsf4          | heat shock transcription factor 4                                    | 2.653719 | 1.07E-06 |
| 21928     | Tnfaip2       | tumor necrosis factor, alpha-induced protein 2                       | -2.66137 | 1.09E-06 |
| 19707     | Reps1         | RaiBP1 associated Eps domain containing protein                      | 0.742893 | 1.10E-06 |
| 239102    | Zfhx2         | zinc finger homeobox 2                                               | 1.325965 | 1.12E-06 |
| 13496     | Arid3a        | AT rich interactive domain 3A (BRIGHT-like)                          | 1.268265 | 1.15E-06 |
| 13483     | Dpp6          | dipeptidylpeptidase 6                                                | 3.672993 | 1.15E-06 |
| 18408     | Slc25a15      | solute carrier family 25 (mitochondrial carrier ornithine transport) | 1.135298 | 1.15E-06 |
| 15438     | Hoxd9         | homeobox D9                                                          | 6.703816 | 1.17E-06 |
| 231507    | Plac8         | placenta-specific 8                                                  | -2.84004 | 1.19E-06 |
| 667370    | Ifit3b        | interferon-induced protein with tetratricopeptide repeats 3B         | -2.26763 | 1.28E-06 |
| 213980    | Fbxw10        | F-box and WD-40 domain protein 10                                    | -1.73566 | 1.29E-06 |
| 20324     | Cavin2        | caveolae associated 2                                                | -1.86976 | 1.33E-06 |
| 102866    | Pls3          | plastin 3 (T-isoform)                                                | -1.89117 | 1.33E-06 |
| 15461     | Hras          | Harvey rat sarcoma virus oncogene                                    | -1.38553 | 1.34E-06 |
| 232441    | Rerg          | RAS-like, estrogen-regulated, growth-inhibitor                       | 2.869381 | 1.39E-06 |
| 17174     | Masp1         | mannan-binding lectin serine peptidase 1                             | -3.20019 | 1.47E-06 |
| 66491     | Polr2l        | polymerase (RNA) II (DNA directed) polypeptide L                     | -1.62274 | 1.47E-06 |
| 11801     | Cd5l          | CD5 antigen-like                                                     | -5.6997  | 1.48E-06 |
| 102634994 | Gm32443       | predicted gene, 32443                                                | 3.603821 | 1.48E-06 |
| 66972     | Slc25a23      | solute carrier family 25 (mitochondrial carrier; phosphate carrier)  | 1.922564 | 1.48E-06 |
| 67412     | Soga3         | SOGA family member 3                                                 | 3.851555 | 1.48E-06 |
| 380785    | Begain        | brain-enriched guanylate kinase-associated                           | 2.441843 | 1.50E-06 |
| 59036     | Dact1         | dishevelled-binding antagonist of beta-catenin 1                     | 4.296411 | 1.51E-06 |
| 50768     | Dlc1          | deleted in liver cancer 1                                            | -1.65794 | 1.52E-06 |
| 14234     | Foxc2         | forkhead box C2                                                      | -2.59736 | 1.53E-06 |
| 13595     | Ebp           | phenylalkylamine Ca2+ antagonist (emopamil) binding protein          | 1.07113  | 1.56E-06 |
| 17260     | Mef2c         | myocyte enhancer factor 2C                                           | -3.6815  | 1.59E-06 |
| 67099     | Mettl21a      | methyltransferase like 21A                                           | -0.96682 | 1.59E-06 |
| 20649     | Sntb1         | syntrophin, basic 1                                                  | 1.683365 | 1.59E-06 |
| 239405    | Rspo2         | R-spondin 2                                                          | -3.97527 | 1.61E-06 |
| 16560     | Kif1a         | kinesin family member 1A                                             | -2.49145 | 1.63E-06 |
| 98496     | Pid1          | phosphotyrosine interaction domain containing 1                      | -1.03057 | 1.65E-06 |
| 72780     | Rspo3         | R-spondin 3                                                          | -1.74489 | 1.66E-06 |
| 74325     | Cltb          | clathrin, light polypeptide (Lcb)                                    | -1.04471 | 1.67E-06 |
| 109319    | 8430422M14Rik | RIKEN cDNA 8430422M14 gene                                           | 3.060918 | 1.72E-06 |
| 18081     | Ninj1         | ninjurin 1                                                           | -0.66786 | 1.74E-06 |
| 329384    | Pthr1         | peptidyl-tRNA hydrolase 1 homolog                                    | -1.21708 | 1.93E-06 |
| 56220     | Zfp386        | zinc finger protein 386 (Kruppel-like)                               | 1.021194 | 2.02E-06 |
| 56216     | Stx1b         | syntaxin 1B                                                          | 2.4446   | 2.05E-06 |
| 71934     | Car13         | carbonic anhydrase 13                                                | -1.62044 | 2.32E-06 |
| 224024    | Scarf2        | scavenger receptor class F, member 2                                 | 1.347157 | 2.33E-06 |
| 232748    | Tcaf2         | TRPM8 channel-associated factor 2                                    | 1.236437 | 2.38E-06 |

|           |               |                                                                    |          |          |
|-----------|---------------|--------------------------------------------------------------------|----------|----------|
| 15114     | Hap1          | huntingtin-associated protein 1                                    | 2.781631 | 2.50E-06 |
| 56811     | Dkk2          | dickkopf WNT signaling pathway inhibitor 2                         | -4.80313 | 2.51E-06 |
| 235627    | Nbeal2        | neurobeachin-like 2                                                | 1.629081 | 2.54E-06 |
| 194401    | Mical3        | microtubule associated monooxygenase, calponin and LIM doma        | 1.369536 | 2.55E-06 |
| 231861    | Tnrc18        | trinucleotide repeat containing 18                                 | 1.474078 | 2.59E-06 |
| 11931     | Atp1b1        | ATPase, Na+/K+ transporting, beta 1 polypeptide                    | 1.948521 | 2.62E-06 |
| 217588    | Mbip          | MAP3K12 binding inhibitory protein 1                               | 1.540187 | 2.68E-06 |
| 112407    | Egln3         | egl-9 family hypoxia-inducible factor 3                            | -3.11691 | 2.77E-06 |
| 66931     | 170001014Rik  | RIKEN cDNA 170001014 gene                                          | -2.24234 | 2.79E-06 |
| 53321     | Cntnap1       | contactin associated protein-like 1                                | 1.843168 | 2.83E-06 |
| 29859     | Sult4a1       | sulfotransferase family 4A, member 1                               | 1.733173 | 2.96E-06 |
| 13885     | Esd           | esterase D/formylglutathione hydrolase                             | -1.14511 | 2.98E-06 |
| 52858     | Cdipt         | CDP-diacylglycerol--inositol 3-phosphatidyltransferase (phosphat   | -1.22798 | 2.99E-06 |
| 218476    | Gcnt4         | glucosaminyl (N-acetyl) transferase 4, core 2 (beta-1,6-N-acetylgl | -3.57584 | 3.06E-06 |
| 319765    | Igf2bp2       | insulin-like growth factor 2 mRNA binding protein 2                | 0.981949 | 3.06E-06 |
| 68617     | Mtcl1         | microtubule crosslinking factor 1                                  | 1.811676 | 3.06E-06 |
| 108946    | Zzz3          | zinc finger, ZZ domain containing 3                                | 0.919234 | 3.13E-06 |
| 24012     | Rgs7          | regulator of G protein signaling 7                                 | 6.442612 | 3.27E-06 |
| 20449     | St8sia1       | ST8 alpha-N-acetyl-neuraminide alpha-2,8-sialyltransferase 1       | 6.167158 | 3.29E-06 |
| 170736    | Parvb         | parvin, beta                                                       | -3.73485 | 3.34E-06 |
| 77411     | Esrp2         | epithelial splicing regulatory protein 2                           | 1.293644 | 3.41E-06 |
| 64340     | Dhx38         | DEAH (Asp-Glu-Ala-His) box polypeptide 38                          | 0.725092 | 3.42E-06 |
| 94284     | Ugt1a6a       | UDP glucuronosyltransferase 1 family, polypeptide A6A              | 3.337717 | 3.43E-06 |
| 11677     | Akr1b3        | aldo-keto reductase family 1, member B3 (aldose reductase)         | -1.24262 | 3.49E-06 |
| 234214    | Sorbs2        | sorbin and SH3 domain containing 2                                 | -2.28762 | 3.56E-06 |
| 68162     | A930003A15Rik | RIKEN cDNA A930003A15 gene                                         | 5.822754 | 3.60E-06 |
| 547127    | Tmem181b-ps   | transmembrane protein 181B, pseudogene                             | 1.089464 | 3.65E-06 |
| 407790    | Ndufa4l2      | Ndufa4, mitochondrial complex associated like 2                    | -7.38083 | 3.77E-06 |
| 67988     | Tmx3          | thioredoxin-related transmembrane protein 3                        | -0.68979 | 3.82E-06 |
| 231470    | Fras1         | Fraser extracellular matrix complex subunit 1                      | 2.232832 | 3.87E-06 |
| 12494     | Cd38          | CD38 antigen                                                       | 2.99963  | 4.41E-06 |
| 74178     | Stk40         | serine/threonine kinase 40                                         | -1.23508 | 4.42E-06 |
| 22403     | Ccn5          | cellular communication network factor 5                            | -3.01365 | 4.44E-06 |
| 69219     | Ddah1         | dimethylarginine dimethylaminohydrolase 1                          | -2.02633 | 4.44E-06 |
| 26424     | Nr5a2         | nuclear receptor subfamily 5, group A, member 2                    | 4.349593 | 4.44E-06 |
| 76156     | Fam131b       | family with sequence similarity 131, member B                      | 1.725579 | 4.56E-06 |
| 237353    | Sh3rf3        | SH3 domain containing ring finger 3                                | 1.419143 | 4.56E-06 |
| 11555     | Adrb2         | adrenergic receptor, beta 2                                        | -1.41209 | 4.60E-06 |
| 13345     | Twist2        | twist basic helix-loop-helix transcription factor 2                | -1.71619 | 4.69E-06 |
| 228432    | Ano3          | anoctamin 3                                                        | -2.46832 | 4.76E-06 |
| 100503074 | 2610016A17Rik | RIKEN cDNA 2610016A17 gene                                         | 5.825367 | 4.93E-06 |
| 193813    | Mcfd2         | multiple coagulation factor deficiency 2                           | -1.04671 | 4.94E-06 |
| 353310    | Zfp703        | zinc finger protein 703                                            | 1.021686 | 4.94E-06 |
| 16554     | Kif13b        | kinesin family member 13B                                          | 1.575195 | 5.13E-06 |
| 213556    | Plekhh2       | pleckstrin homology domain containing, family H (with MyTH4 dr     | 1.937026 | 5.13E-06 |
| 93892     | Pcdhb21       | protocadherin beta 21                                              | 2.218592 | 5.15E-06 |
| 20715     | Serpina3g     | serine (or cysteine) peptidase inhibitor, clade A, member 3G       | -2.65065 | 5.19E-06 |
| 18983     | Cnot7         | CCR4-NOT transcription complex, subunit 7                          | 0.73896  | 5.25E-06 |
| 170833    | Hook2         | hook microtubule tethering protein 2                               | 1.179109 | 5.36E-06 |
| 80287     | Apobec3       | apolipoprotein B mRNA editing enzyme, catalytic polypeptide 3      | 0.956756 | 5.66E-06 |
| 67073     | Pi4k2b        | phosphatidylinositol 4-kinase type 2 beta                          | -1.40049 | 5.82E-06 |
| 99929     | Tiparp        | TCDD-inducible poly(ADP-ribose) polymerase                         | 1.484335 | 5.82E-06 |
| 52906     | Ahi1          | Abelson helper integration site 1                                  | -1.31946 | 6.09E-06 |
| 30948     | Bin1          | bridging integrator 1                                              | -0.93342 | 6.12E-06 |
| 58235     | Nectin1       | nectin cell adhesion molecule 1                                    | -1.54875 | 6.12E-06 |
| 22350     | Ezr           | ezrin                                                              | 1.675694 | 6.15E-06 |
| 66889     | Rnf128        | ring finger protein 128                                            | -1.40637 | 6.15E-06 |
| 14836     | Gsc           | goosecoid homeobox                                                 | 5.923785 | 6.19E-06 |
| 100037258 | Dnajc3        | DnaJ heat shock protein family (Hsp40) member C3                   | -0.83179 | 6.24E-06 |
| 17135     | Mafk          | v-maf musculoaponeurotic fibrosarcoma oncogene family, protei      | -1.19214 | 6.25E-06 |
| 24113     | Vax2          | ventral anterior homeobox 2                                        | -2.63618 | 6.74E-06 |
| 26417     | Mapk3         | mitogen-activated protein kinase 3                                 | -0.78691 | 6.85E-06 |
| 68910     | Zfp467        | zinc finger protein 467                                            | 1.205277 | 6.85E-06 |
| 18575     | Pde1c         | phosphodiesterase 1C                                               | 3.91167  | 6.92E-06 |
| 20306     | Ccl7          | chemokine (C-C motif) ligand 7                                     | -2.41216 | 6.94E-06 |
| 64450     | Gpr85         | G protein-coupled receptor 85                                      | -2.29835 | 7.01E-06 |
| 60322     | Chst7         | carbohydrate (N-acetylglucosamino) sulfotransferase 7              | -2.79298 | 7.05E-06 |
| 229801    | Tram111       | translocation associated membrane protein 1-like 1                 | -3.96877 | 7.20E-06 |
| 13032     | Ctsc          | cathepsin C                                                        | -3.24187 | 7.26E-06 |
| 14562     | Gdf3          | growth differentiation factor 3                                    | -7.62917 | 7.47E-06 |
| 71837     | 1700003E16Rik | RIKEN cDNA 1700003E16 gene                                         | -2.31783 | 7.60E-06 |
| 12520     | Cd81          | CD81 antigen                                                       | -1.26863 | 7.62E-06 |
| 104360    | Isl2          | insulin related protein 2 (islet 2)                                | 3.937014 | 7.79E-06 |
| 381812    | Cracr2a       | calcium release activated channel regulator 2A                     | 2.0204   | 7.86E-06 |
| 68087     | Dcakd         | dephospho-CoA kinase domain containing                             | 0.683507 | 7.90E-06 |

|           |                |                                                                               |           |          |
|-----------|----------------|-------------------------------------------------------------------------------|-----------|----------|
| 13859     | Eps15l1        | epidermal growth factor receptor pathway substrate 15-like 1                  | 0.88153   | 7.90E-06 |
| 109135    | Plekha5        | pleckstrin homology domain containing, family A member 5                      | 0.904297  | 7.92E-06 |
| 15118     | Has3           | hyaluronan synthase 3                                                         | 2.174249  | 7.96E-06 |
| 11988     | Slc7a2         | solute carrier family 7 (cationic amino acid transporter, y+ system)          | 2.887405  | 8.22E-06 |
| 63828     | Fn3k           | fructosamine 3 kinase                                                         | 3.372556  | 8.27E-06 |
| 246710    | Rhobtb2        | Rho-related BTB domain containing 2                                           | 0.982013  | 8.37E-06 |
| 545260    | Arsi           | arylsulfatase i                                                               | 2.64693   | 8.50E-06 |
| 27279     | Tnfrsf12a      | tumor necrosis factor receptor superfamily, member 12a                        | -1.10766  | 8.74E-06 |
| 18670     | Abcb4          | ATP-binding cassette, sub-family B (MDR/TAP), member 4                        | 2.36081   | 8.80E-06 |
| 382056    | Crtc1          | CREB regulated transcription coactivator 1                                    | 1.435901  | 8.95E-06 |
| 117160    | Ttyh2          | tweety family member 2                                                        | -0.82234  | 8.95E-06 |
| 67035     | Dnajb4         | DnaJ heat shock protein family (Hsp40) member B4                              | -1.27022  | 9.02E-06 |
| 13830     | Stom           | stomatin                                                                      | -1.44849  | 9.05E-06 |
| 381175    | Ccdc68         | coiled-coil domain containing 68                                              | -3.38833  | 9.27E-06 |
| 83669     | Wdr6           | WD repeat domain 6                                                            | 0.988248  | 9.62E-06 |
| 56843     | Trpm5          | transient receptor potential cation channel, subfamily M, member 5            | -3.13152  | 9.66E-06 |
| 13855     | Epn2           | epsin 2                                                                       | -0.71549  | 9.88E-06 |
| 102636264 | Gm33378        | predicted gene, 33378                                                         | 2.676489  | 1.00E-05 |
| 214345    | Lrrc1          | leucine rich repeat containing 1                                              | 1.389484  | 1.00E-05 |
| 100515    | Zfp518b        | zinc finger protein 518B                                                      | 1.058293  | 1.01E-05 |
| 76561     | Snx7           | sorting nexin 7                                                               | -1.55847  | 1.03E-05 |
| 218335    | Clptm1l        | CLPTM1-like                                                                   | -0.81507  | 1.05E-05 |
| 16400     | Itga3          | integrin alpha 3                                                              | 1.703551  | 1.07E-05 |
| 59091     | Jph2           | junctophilin 2                                                                | -2.7678   | 1.11E-05 |
| 319481    | Wdr59          | WD repeat domain 59                                                           | 0.860191  | 1.15E-05 |
| 279653    | Pcdh19         | protocadherin 19                                                              | -3.17719  | 1.19E-05 |
| 53376     | Usp2           | ubiquitin specific peptidase 2                                                | -2.01424  | 1.20E-05 |
| 434130    | Ccdc8          | coiled-coil domain containing 8                                               | 2.596512  | 1.22E-05 |
| 52466     | Slc46a1        | solute carrier family 46, member 1                                            | -1.15938  | 1.28E-05 |
| 66174     | Nudt14         | nudix (nucleoside diphosphate linked moiety X)-type motif 14                  | 1.248303  | 1.33E-05 |
| 14645     | Glul           | glutamate-ammonia ligase (glutamine synthetase)                               | -1.20531  | 1.34E-05 |
| 108167986 | Gm46339        | predicted gene, 46339                                                         | 2.364573  | 1.41E-05 |
| 64656     | Mrps23         | mitochondrial ribosomal protein S23                                           | -0.71587  | 1.41E-05 |
| 381232    | Mirt1          | myocardial infarction associated transcript 1                                 | 3.480681  | 1.46E-05 |
| 238023    | Hexdc          | hexosaminidase (glycosyl hydrolase family 20, catalytic domain) (EC 3.2.1.31) | 1.347008  | 1.62E-05 |
| 24014     | Rnasel         | ribonuclease L (2', 5'-oligoadenylate synthetase-dependent)                   | 1.759538  | 1.65E-05 |
| 12585     | Cdr2           | cerebellar degeneration-related 2                                             | -1.59479  | 1.69E-05 |
| 52118     | Pvr            | poliovirus receptor                                                           | -0.98964  | 1.74E-05 |
| 12330     | Canx           | calnexin                                                                      | -0.84129  | 1.81E-05 |
| 18769     | Pkig           | protein kinase inhibitor, gamma                                               | -1.16364  | 1.81E-05 |
| 211914    | Asap2          | ArfGAP with SH3 domain, ankyrin repeat and PH domain 2                        | 1.285569  | 1.86E-05 |
| 77590     | Chst15         | carbohydrate sulfotransferase 15                                              | -1.09574  | 1.86E-05 |
| 15558     | Htr2a          | 5-hydroxytryptamine (serotonin) receptor 2A                                   | -2.00159  | 1.94E-05 |
| 666182    | Gm7967         | predicted gene 7967                                                           | 4.913265  | 1.95E-05 |
| 245240    | 9930111J21Rik2 | RIKEN cDNA 9930111J21 gene 2                                                  | -2.7987   | 2.02E-05 |
| 12014     | Bach2          | BTB and CNC homology, basic leucine zipper transcription factor 1             | 21.697213 | 2.08E-05 |
| 215653    | Rassf2         | Ras association (RalGDS/AF-6) domain family member 2                          | 1.661585  | 2.08E-05 |
| 11438     | Chrna4         | cholinergic receptor, nicotinic, alpha polypeptide 4                          | 2.719951  | 2.10E-05 |
| 56364     | Zmym3          | zinc finger, MYM-type 3                                                       | 0.846778  | 2.10E-05 |
| 192656    | Ripk2          | receptor (TNFRSF)-interacting serine-threonine kinase 2                       | -1.49858  | 2.19E-05 |
| 107065    | Lrrtm2         | leucine rich repeat transmembrane neuronal 2                                  | -3.91808  | 2.27E-05 |
| 13592     | Ebf2           | early B cell factor 2                                                         | 4.171848  | 2.28E-05 |
| 29877     | Hdgf3          | HDGF like 3                                                                   | 1.87893   | 2.30E-05 |
| 12183     | Bpgm           | 2,3-bisphosphoglycerate mutase                                                | -1.65497  | 2.37E-05 |
| 76829     | Dok5           | docking protein 5                                                             | -2.09197  | 2.41E-05 |
| 14612     | Gja4           | gap junction protein, alpha 4                                                 | -5.50719  | 2.42E-05 |
| 241112    | Catip          | ciliogenesis associated TTC17 interacting protein                             | -3.08429  | 2.47E-05 |
| 26408     | Map3k5         | mitogen-activated protein kinase kinase kinase 5                              | 1.890847  | 2.52E-05 |
| 66849     | Ppp1r2         | protein phosphatase 1, regulatory inhibitor subunit 2                         | -0.68747  | 2.52E-05 |
| 384087    | Gm13146        | carnitine deficiency-associated gene expressed in ventricle 3 protein         | 3.72876   | 2.57E-05 |
| 16529     | Kcnk5          | potassium channel, subfamily K, member 5                                      | 2.533488  | 2.60E-05 |
| 224019    | Tmem191c       | transmembrane protein 191C                                                    | 1.949516  | 2.62E-05 |
| 70316     | Ndufab1        | NADH:ubiquinone oxidoreductase subunit AB1                                    | -1.04842  | 2.68E-05 |
| 17183     | Matn4          | matrilin 4                                                                    | -2.02332  | 2.88E-05 |
| 18741     | Pitx2          | paired-like homeodomain transcription factor 2                                | -3.50068  | 2.88E-05 |
| 12223     | Btc            | betacellulin, epidermal growth factor family member 3                         | -1.48305  | 2.92E-05 |
| 19285     | Cavin1         | caveolae associated 1                                                         | -1.23655  | 3.07E-05 |
| 69399     | 1700025G04Rik  | RIKEN cDNA 1700025G04 gene                                                    | 1.025461  | 3.22E-05 |
| 66510     | Rnf181         | ring finger protein 181                                                       | -0.8671   | 3.22E-05 |
| 72930     | Ppp2r2b        | protein phosphatase 2, regulatory subunit B, beta                             | 2.039607  | 3.30E-05 |
| 66895     | Pxdc1          | PX domain containing 1                                                        | -2.02058  | 3.30E-05 |
| 13716     | Eil            | elongation factor RNA polymerase II                                           | 1.285281  | 3.32E-05 |
| 109032    | Sp110          | Sp110 nuclear body protein                                                    | 1.830433  | 3.32E-05 |
| 13837     | Epha3          | Eph receptor A3                                                               | -6.40562  | 3.39E-05 |
| 547091    | Gm6020         | predicted gene 6020                                                           | 3.080596  | 3.43E-05 |

|           |               |                                                                    |          |          |
|-----------|---------------|--------------------------------------------------------------------|----------|----------|
| 27205     | Podxl         | podocalyxin-like                                                   | 3.360628 | 3.44E-05 |
| 54208     | Arl6ip1       | ADP-ribosylation factor-like 6 interacting protein 1               | -0.87354 | 3.59E-05 |
| 69590     | Gpx8          | glutathione peroxidase 8 (putative)                                | -1.05216 | 3.60E-05 |
| 56318     | Acpp          | acid phosphatase, prostate                                         | 3.917022 | 3.62E-05 |
| 13555     | E2f1          | E2F transcription factor 1                                         | -1.19526 | 3.62E-05 |
| 245596    | Hdx           | highly divergent homeobox                                          | -2.50855 | 3.66E-05 |
| 320558    | Sycp2         | synaptonemal complex protein 2                                     | 2.304786 | 3.68E-05 |
| 16398     | Itga2         | integrin alpha 2                                                   | -3.90303 | 3.70E-05 |
| 105171    | Arrdc3        | arrestin domain containing 3                                       | -1.32682 | 3.75E-05 |
| 100504489 | NA            | NA                                                                 | -6.18445 | 3.79E-05 |
| 270084    | Lpcat2        | lysophosphatidylcholine acyltransferase 2                          | -3.7763  | 3.94E-05 |
| 67071     | Rps6ka6       | ribosomal protein S6 kinase polypeptide 6                          | 1.71061  | 4.01E-05 |
| 20128     | Trim30a       | tripartite motif-containing 30A                                    | -1.72236 | 4.05E-05 |
| 16548     | Khk           | ketoheokinase                                                      | 1.63035  | 4.14E-05 |
| 666468    | Atg4a         | autophagy related 4A, cysteine peptidase                           | -1.00078 | 4.15E-05 |
| 100417726 | Gm18787       | predicted gene, 18787                                              | -4.50285 | 4.15E-05 |
| 71306     | Mfap3l        | microfibrillar-associated protein 3-like                           | -3.42399 | 4.15E-05 |
| 66869     | Zfp869        | zinc finger protein 869                                            | 0.966679 | 4.19E-05 |
| 268759    | 9930012K11Rik | RIKEN cDNA 9930012K11 gene                                         | 1.342628 | 4.36E-05 |
| 68038     | Chid1         | chitinase domain containing 1                                      | -1.29016 | 4.47E-05 |
| 79233     | Zfp319        | zinc finger protein 319                                            | 0.824725 | 4.51E-05 |
| 278279    | Tmtc2         | transmembrane and tetratricopeptide repeat containing 2            | -2.21482 | 4.65E-05 |
| 76687     | Spcs3         | signal peptidase complex subunit 3 homolog (S. cerevisiae)         | 1.174842 | 4.68E-05 |
| 67226     | Tmem19        | transmembrane protein 19                                           | -0.73152 | 4.68E-05 |
| 94227     | Pi15          | peptidase inhibitor 15                                             | -4.21479 | 4.76E-05 |
| 109222    | Rarres1       | retinoic acid receptor responder (tazarotene induced) 1            | -2.86188 | 4.76E-05 |
| 66082     | Abhd6         | abhydrolase domain containing 6                                    | 0.89445  | 4.87E-05 |
| 64685     | Nmi           | N-myc (and STAT) interactor                                        | 1.291371 | 4.95E-05 |
| 21942     | Tnfrsf9       | tumor necrosis factor receptor superfamily, member 9               | -6.6092  | 5.12E-05 |
| 381334    | Gal3st2       | galactose-3-O-sulfotransferase 2                                   | -2.49739 | 5.43E-05 |
| 66176     | Nat9          | N-acetyltransferase 9 (GCN5-related, putative)                     | -1.05306 | 5.43E-05 |
| 29810     | Bag3          | BCL2-associated athanogene 3                                       | -0.87495 | 5.46E-05 |
| 67102     | D16Erd472e    | DNA segment, Chr 16, ERATO Doi 472, expressed                      | 1.370219 | 5.56E-05 |
| 67484     | Eepd1         | endonuclease/exonuclease/phosphatase family domain containi        | 3.08672  | 5.70E-05 |
| 16323     | Inhba         | inhibin beta-A                                                     | -2.45761 | 5.70E-05 |
| 219094    | Khynyn        | KH and NYN domain containing                                       | 0.992376 | 5.81E-05 |
| 20963     | Syk           | spleen tyrosine kinase                                             | -3.51774 | 5.88E-05 |
| 627191    | Syndig1l      | synapse differentiation inducing 1 like                            | 5.615277 | 5.89E-05 |
| 23997     | Psmd13        | proteasome (prosome, macropain) 26S subunit, non-ATPase, 13        | -1.31659 | 5.91E-05 |
| 20668     | Sox13         | SRY (sex determining region Y)-box 13                              | -2.12339 | 5.92E-05 |
| 100210    | Gpn2          | GPN-loop GTPase 2                                                  | -1.13792 | 6.06E-05 |
| 13386     | Dlk1          | delta like non-canonical Notch ligand 1                            | 1.696815 | 6.10E-05 |
| 51799     | Rundc3a       | RUN domain containing 3A                                           | 1.080643 | 6.26E-05 |
| 77531     | Anks1b        | ankyrin repeat and sterile alpha motif domain containing 1B        | -3.99429 | 6.35E-05 |
| 241943    | Ccdc144b      | coiled-coil domain containing 144B                                 | 4.940418 | 6.35E-05 |
| 105246453 | Gm26507       | predicted gene, 26507                                              | 6.277267 | 6.43E-05 |
| 78372     | Snrnp25       | small nuclear ribonucleoprotein 25 (U11/U12)                       | -1.37683 | 6.43E-05 |
| 104923    | Adi1          | acireductone dioxygenase 1                                         | 1.11597  | 6.44E-05 |
| 209200    | Dtx3l         | deltex 3-like, E3 ubiquitin ligase                                 | 0.825195 | 6.46E-05 |
| 109154    | Mlec          | malectin                                                           | -0.78216 | 6.57E-05 |
| 243219    | 2900026A02Rik | RIKEN cDNA 2900026A02 gene                                         | 1.529803 | 6.58E-05 |
| 93878     | Pcdhb7        | protocadherin beta 7                                               | 1.82762  | 6.62E-05 |
| 15437     | Hoxd8         | homeobox D8                                                        | 3.79577  | 6.76E-05 |
| 19881     | Rom1          | rod outer segment membrane protein 1                               | -1.1388  | 6.77E-05 |
| 18027     | Nfia          | nuclear factor I/A                                                 | 0.975256 | 6.83E-05 |
| 269959    | Adamts13      | ADAMTS-like 3                                                      | -3.18577 | 6.87E-05 |
| 14423     | Galnt1        | polypeptide N-acetylgalactosaminyltransferase 1                    | -0.77576 | 6.87E-05 |
| 497652    | Acd           | adrenocortical dysplasia                                           | 0.684065 | 6.90E-05 |
| 53883     | Celsr2        | cadherin, EGF LAG seven-pass G-type receptor 2                     | 1.812102 | 6.90E-05 |
| 14461     | Gata2         | GATA binding protein 2                                             | -0.72305 | 7.05E-05 |
| 216616    | Efemp1        | epidermal growth factor-containing fibulin-like extracellular matr | -1.90266 | 7.09E-05 |
| 53325     | Banp          | BTG3 associated nuclear protein                                    | 0.922763 | 7.40E-05 |
| 100041231 | Gm3219        | B-cell CLL/lymphoma 7C pseudogene                                  | 1.943174 | 7.40E-05 |
| 668924    | NA            | NA                                                                 | 5.536764 | 7.48E-05 |
| 66817     | Tmem170       | transmembrane protein 170                                          | 1.30016  | 7.55E-05 |
| 67844     | Rab32         | RAB32, member RAS oncogene family                                  | -1.37529 | 7.81E-05 |
| 104383    | Rcor2         | REST corepressor 2                                                 | -1.41057 | 7.96E-05 |
| 53978     | Lpar2         | lysophosphatidic acid receptor 2                                   | 2.062966 | 8.29E-05 |
| 66011     | Ranbp17       | RAN binding protein 17                                             | 1.153926 | 8.31E-05 |
| 104776    | Aldh6a1       | aldehyde dehydrogenase family 6, subfamily A1                      | 2.274167 | 8.37E-05 |
| 76332     | Cog2          | component of oligomeric golgi complex 2                            | 0.642079 | 8.47E-05 |
| 69732     | 2410018L13Rik | RIKEN cDNA 2410018L13 gene                                         | -5.88726 | 8.51E-05 |
| 18082     | Nipsnap1      | nipsnap homolog 1                                                  | 0.803847 | 8.51E-05 |
| 208146    | Yeats2        | YEATS domain containing 2                                          | 1.838356 | 8.53E-05 |
| 68828     | Sync          | syncollin                                                          | -1.92322 | 8.61E-05 |



|           |               |                                                                     |          |          |
|-----------|---------------|---------------------------------------------------------------------|----------|----------|
| 68659     | Gask1b        | golgi associated kinase 1B                                          | -1.34239 | 8.63E-05 |
| 100503961 | Gm19990       | predicted gene, 19990                                               | 4.028317 | 8.63E-05 |
| 16186     | Il2rg         | interleukin 2 receptor, gamma chain                                 | -3.27256 | 8.64E-05 |
| 234814    | Mthfsd        | methenyltetrahydrofolate synthetase domain containing               | 0.953887 | 8.64E-05 |
| 20195     | S100a11       | S100 calcium binding protein A11                                    | -0.89637 | 8.68E-05 |
| 50530     | Mfap5         | microfibrillar associated protein 5                                 | -2.3143  | 8.70E-05 |
| 118449    | Synpo2        | synaptopodin 2                                                      | -2.73084 | 8.70E-05 |
| 22339     | Vegfa         | vascular endothelial growth factor A                                | -1.18457 | 8.70E-05 |
| 102371    | Myzap         | myocardial zonula adherens protein                                  | -3.12441 | 8.81E-05 |
| 12695     | Patj          | PATJ, crumbs cell polarity complex component                        | 1.223147 | 8.83E-05 |
| 635617    | Gm7162        | RAN GTPase activating protein 1 pseudogene                          | 2.970606 | 8.88E-05 |
| 72935     | Ddx41         | DEAD box helicase 41                                                | 0.867781 | 9.12E-05 |
| 14049     | Eya2          | EYA transcriptional coactivator and phosphatase 2                   | 5.831551 | 9.12E-05 |
| 58182     | Prokr1        | prokineticin receptor 1                                             | 2.445102 | 9.12E-05 |
| 51801     | Ramp1         | receptor (calcitonin) activity modifying protein 1                  | 3.095853 | 9.12E-05 |
| 226098    | Hectd2        | HECT domain E3 ubiquitin protein ligase 2                           | -2.37949 | 9.15E-05 |
| 231549    | Lrrc8d        | leucine rich repeat containing 8D                                   | -1.92535 | 9.23E-05 |
| 57246     | Tbx20         | T-box 20                                                            | 5.676581 | 9.32E-05 |
| 14017     | Evi2a         | ecotropic viral integration site 2a                                 | -2.88935 | 9.59E-05 |
| 71207     | Nudt4         | nudix (nucleoside diphosphate linked moiety X)-type motif 4         | -1.11101 | 9.59E-05 |
| 72948     | Tppp          | tubulin polymerization promoting protein                            | 2.929076 | 9.65E-05 |
| 192193    | Edem1         | ER degradation enhancer, mannosidase alpha-like 1                   | -0.8677  | 9.68E-05 |
| 14042     | Ext1          | exostosin glycosyltransferase 1                                     | -1.01864 | 9.74E-05 |
| 330119    | Adamts3       | a disintegrin-like and metallopeptidase (reprolysin type) with thr  | 2.798182 | 9.75E-05 |
| 12167     | Bmpr1b        | bone morphogenetic protein receptor, type 1B                        | -1.62242 | 9.85E-05 |
| 239559    | A4galt        | alpha 1,4-galactosyltransferase                                     | -2.33777 | 9.96E-05 |
| 74430     | Cfap20dc      | CFAP20 domain containing                                            | -3.55964 | 9.96E-05 |
| 665574    | Gm7694        | predicted gene 7694                                                 | 1.674487 | 9.96E-05 |
| 70892     | Ttli7         | tubulin tyrosine ligase-like family, member 7                       | -2.01713 | 9.96E-05 |
| 260409    | Cdc42ep3      | CDC42 effector protein (Rho GTPase binding) 3                       | 1.639115 | 0.000101 |
| 68808     | 1110046J04Rik | RIKEN cDNA 1110046J04 gene                                          | -1.56991 | 0.000101 |
| 54354     | Rassf5        | Ras association (RalGDS/AF-6) domain family member 5                | 0.929815 | 0.000102 |
| 76630     | Stambpl1      | STAM binding protein like 1                                         | -0.99106 | 0.000105 |
| 14537     | Gcnt1         | glucosaminyl (N-acetyl) transferase 1, core 2                       | 2.042648 | 0.000105 |
| 619715    | Gm6093        | predicted gene 6093                                                 | -4.19275 | 0.000107 |
| 668139    | Gm8995        | predicted gene 8995                                                 | -1.78471 | 0.000107 |
| 110351    | Rap1gap       | Rap1 GTPase-activating protein                                      | 1.43479  | 0.000107 |
| 16196     | Il7           | interleukin 7                                                       | -2.55544 | 0.00011  |
| 17702     | Msx2          | msh homeobox 2                                                      | -4.5291  | 0.00011  |
| 11695     | Alx4          | aristaless-like homeobox 4                                          | 5.72085  | 0.000113 |
| 394432    | Ugt1a7c       | UDP glucuronosyltransferase 1 family, polypeptide A7C               | 1.901844 | 0.000116 |
| 230737    | Gnl2          | guanine nucleotide binding protein-like 2 (nucleolar)               | 0.742111 | 0.000116 |
| 23991     | Cib1          | calcium and integrin binding 1 (calmyrin)                           | -1.06401 | 0.000116 |
| 71898     | Apol9b        | apolipoprotein L 9b                                                 | -2.96765 | 0.000116 |
| 545276    | Gal3st3       | galactose-3-O-sulfotransferase 3                                    | 3.614349 | 0.000116 |
| 329093    | Cpa6          | carboxypeptidase A6                                                 | -2.1215  | 0.000116 |
| 219151    | Scara3        | scavenger receptor class A, member 3                                | -1.91015 | 0.000116 |
| 110208    | Pgd           | phosphogluconate dehydrogenase                                      | -1.00998 | 0.000117 |
| 219134    | Shisa2        | shisa family member 2                                               | 3.099515 | 0.000118 |
| 13806     | Eno1          | enolase 1, alpha non-neuron                                         | -1.32344 | 0.000118 |
| 13690     | Eif4g2        | eukaryotic translation initiation factor 4, gamma 2                 | -0.61925 | 0.000119 |
| 330790    | Hapln4        | hyaluronan and proteoglycan link protein 4                          | 1.36949  | 0.000119 |
| 14149     | Fdxr          | ferredoxin reductase                                                | 1.428289 | 0.000119 |
| 208164    | Fam180a       | family with sequence similarity 180, member A                       | 2.06172  | 0.000119 |
| 330788    | Zfp866        | zinc finger protein 866                                             | 1.23721  | 0.000125 |
| 12042     | Bcl10         | B cell leukemia/lymphoma 10                                         | -0.65276 | 0.000127 |
| 329540    | Nol4l         | nucleolar protein 4-like                                            | 1.179874 | 0.000127 |
| 66165     | Bccip         | BRCA2 and CDKN1A interacting protein                                | -0.84178 | 0.000127 |
| 102635290 | Ttc39aos1     | Ttc39a opposite strand RNA 1                                        | 3.129185 | 0.000127 |
| 20732     | Spint1        | serine protease inhibitor, Kunitz type 1                            | 2.250284 | 0.000128 |
| 14588     | Gfra4         | glial cell line derived neurotrophic factor family receptor alpha 4 | -1.31282 | 0.000129 |
| 217066    | Elobl         | elongin B-like                                                      | -3.1449  | 0.00013  |
| 218271    | B4galt7       | xylosylprotein beta1,4-galactosyltransferase, polypeptide 7 (galac  | -0.86431 | 0.00013  |
| 18037     | Nfkbie        | nuclear factor of kappa light polypeptide gene enhancer in B cells  | -1.2235  | 0.00013  |
| 218454    | Lhfp12        | lipoma HMGIC fusion partner-like 2                                  | -1.2703  | 0.000132 |
| 56384     | Letm1         | leucine zipper-EF-hand containing transmembrane protein 1           | -0.60909 | 0.000132 |
| 230162    | Zfp189        | zinc finger protein 189                                             | 1.173595 | 0.000133 |
| 70233     | Cd2bp2        | CD2 cytoplasmic tail binding protein 2                              | -0.76572 | 0.000134 |
| 18196     | Nsg1          | neuron specific gene family member 1                                | 1.474665 | 0.000134 |
| 19224     | Ptgs1         | prostaglandin-endoperoxide synthase 1                               | -1.51839 | 0.000134 |
| 14594     | Ggta1         | glycoprotein galactosyltransferase alpha 1, 3                       | -0.99091 | 0.000137 |
| 103012    | Firre         | functional intergenic repeating RNA element                         | 1.268294 | 0.000137 |
| 66249     | Pno1          | partner of NOB1 homolog                                             | -0.77435 | 0.000138 |
| 83554     | Fstl3         | folliculin-like 3                                                   | -1.36227 | 0.00014  |
| 16510     | Kcnh1         | potassium voltage-gated channel, subfamily H (eag-related), mer     | 2.919568 | 0.00014  |

|           |               |                                                                    |          |          |
|-----------|---------------|--------------------------------------------------------------------|----------|----------|
| 381338    | Lonrf2        | LON peptidase N-terminal domain and ring finger 2                  | -3.58988 | 0.00014  |
| 72514     | Fgfbp3        | fibroblast growth factor binding protein 3                         | -1.43471 | 0.000141 |
| 216739    | Acsf6         | acyl-CoA synthetase long-chain family member 6                     | 1.919841 | 0.000142 |
| 329056    | A830019P07Rik | RIKEN cDNA A830019P07 gene                                         | -2.38437 | 0.000142 |
| 73230     | Bmper         | BMP-binding endothelial regulator                                  | 1.237938 | 0.000143 |
| 20970     | Sdc3          | syndecan 3                                                         | -2.0453  | 0.000144 |
| 207592    | Tbc1d16       | TBC1 domain family, member 16                                      | 1.419708 | 0.000145 |
| 14853     | Gspt2         | G1 to S phase transition 2                                         | -0.98163 | 0.000145 |
| 233744    | Spon1         | spondin 1, (f-spondin) extracellular matrix protein                | -2.17417 | 0.000146 |
| 329584    | Slc2a4rg-ps   | Slc2a4 regulator, pseudogene                                       | 1.689829 | 0.000147 |
| 60527     | Fads3         | fatty acid desaturase 3                                            | -0.81981 | 0.000149 |
| 108052    | Slc14a1       | solute carrier family 14 (urea transporter), member 1              | -6.11334 | 0.00015  |
| 50782     | Rgs11         | regulator of G-protein signaling 11                                | 1.769801 | 0.000152 |
| 68050     | Akirin1       | akirin 1                                                           | -1.06962 | 0.000157 |
| 217198    | Plekhh3       | pleckstrin homology domain containing, family H (with MyTH4 do     | 0.661807 | 0.000157 |
| 13036     | Ctsh          | cathepsin H                                                        | -1.61783 | 0.00016  |
| 229211    | Acad9         | acyl-Coenzyme A dehydrogenase family, member 9                     | 0.775191 | 0.00016  |
| 234776    | Atmin         | ATM interactor                                                     | 0.930941 | 0.00016  |
| 69698     | Slc52a3       | solute carrier protein family 52, member 3                         | 2.562059 | 0.000161 |
| 234728    | Cmtr2         | cap methyltransferase 2                                            | 0.827869 | 0.000162 |
| 66054     | Cndp2         | CNDP dipeptidase 2 (metallopeptidase M20 family)                   | -1.0166  | 0.000164 |
| 17536     | Meis2         | Meis homeobox 2                                                    | 1.312519 | 0.000165 |
| 109978    | Art4          | ADP-ribosyltransferase 4                                           | -3.43392 | 0.000165 |
| 242860    | Rsbnl1        | round spermatid basic protein 1-like                               | 0.742783 | 0.000171 |
| 27280     | Phlda3        | pleckstrin homology like domain, family A, member 3                | -0.88383 | 0.000171 |
| 16950     | Loxl3         | lysyl oxidase-like 3                                               | -1.24375 | 0.000171 |
| 66286     | Sec11c        | SEC11 homolog C, signal peptidase complex subunit                  | -1.25453 | 0.000172 |
| 19128     | Prosl         | protein S (alpha)                                                  | -1.01234 | 0.000177 |
| 20513     | Slc1a6        | solute carrier family 1 (high affinity aspartate/glutamate transpo | -0.86021 | 0.000185 |
| 11674     | Aldoa         | aldolase A, fructose-bisphosphate                                  | -1.36861 | 0.000186 |
| 16468     | Jarid2        | jumonji, AT rich interactive domain 2                              | 0.884247 | 0.000187 |
| 73442     | Hspa12a       | heat shock protein 12A                                             | -1.42328 | 0.000187 |
| 19882     | Mst1r         | macrophage stimulating 1 receptor (c-met-related tyrosine kinas    | 1.703644 | 0.000191 |
| 109857    | Cbr3          | carbonyl reductase 3                                               | -0.95455 | 0.000191 |
| 51875     | Tmem141       | transmembrane protein 141                                          | -0.93319 | 0.000191 |
| 234362    | Zfp868        | zinc finger protein 868                                            | 0.750242 | 0.000191 |
| 330814    | Adgrl1        | adhesion G protein-coupled receptor L1                             | 1.148051 | 0.000191 |
| 12121     | Bicd1         | BICD cargo adaptor 1                                               | 1.051542 | 0.000191 |
| 66162     | Bola2         | bolA-like 2 (E. coli)                                              | -1.16988 | 0.000191 |
| 71520     | Grap          | GRB2-related adaptor protein                                       | -3.15443 | 0.000193 |
| 15980     | Ifngr2        | interferon gamma receptor 2                                        | -0.93755 | 0.000193 |
| 16635     | Klra4         | killer cell lectin-like receptor, subfamily A, member 4            | -3.30393 | 0.000193 |
| 229694    | AI504432      | expressed sequence AI504432                                        | -2.85583 | 0.000194 |
| 68790     | Fendrr        | Foxf1 adjacent non-coding developmental regulatory RNA             | 1.760505 | 0.000194 |
| 107895    | Mgat5         | mannoside acetylglucosaminyltransferase 5                          | -1.2345  | 0.000194 |
| 66407     | Mrps15        | mitochondrial ribosomal protein S15                                | -0.65698 | 0.000198 |
| 226849    | Ppp2r5a       | protein phosphatase 2, regulatory subunit B', alpha                | 0.74939  | 0.000198 |
| 27410     | Abca3         | ATP-binding cassette, sub-family A (ABC1), member 3                | 1.108523 | 0.000199 |
| 229600    | BC028528      | cDNA sequence BC028528                                             | -1.78109 | 0.0002   |
| 65112     | Pmepa1        | prostate transmembrane protein, androgen induced 1                 | -1.55944 | 0.0002   |
| 11482     | Acvrl1        | activin A receptor, type II-like 1                                 | -2.43825 | 0.000207 |
| 100039781 | Hrct1         | histidine rich carboxyl terminus 1                                 | -2.45602 | 0.000209 |
| 19331     | Rab19         | RAB19, member RAS oncogene family                                  | 1.98337  | 0.000211 |
| 224129    | Adcy5         | adenylate cyclase 5                                                | 2.214973 | 0.000211 |
| 11605     | Gla           | galactosidase, alpha                                               | -0.95324 | 0.000214 |
| 67573     | Loxl4         | lysyl oxidase-like 4                                               | -1.30963 | 0.000214 |
| 110379    | Sec13         | SEC13 homolog, nuclear pore and COPII coat complex component       | -0.78256 | 0.000217 |
| 13857     | Epor          | erythropoietin receptor                                            | 2.472379 | 0.00022  |
| 67217     | L3h3pdx       | L-3-hydroxyproline dehydratase (trans-)                            | -0.96696 | 0.00022  |
| 71746     | Rgl3          | ral guanine nucleotide dissociation stimulator-like 3              | 1.179861 | 0.000222 |
| 69574     | Cmb1          | carboxymethylenebutenolidase-like (Pseudomonas)                    | -2.0187  | 0.000226 |
| 107376    | E330013P04Rik | RIKEN cDNA E330013P04 gene                                         | 1.822165 | 0.000228 |
| 213603    | Slc44a3       | solute carrier family 44, member 3                                 | 0.976632 | 0.000228 |
| 16600     | Klf4          | Kruppel-like factor 4 (gut)                                        | -1.58059 | 0.00023  |
| 66855     | Tcf25         | transcription factor 25 (basic helix-loop-helix)                   | 0.616013 | 0.000232 |
| 545370    | Hmcn1         | hemiscentin 1                                                      | -2.45738 | 0.000233 |
| 192651    | Zfp286        | zinc finger protein 286                                            | -1.55143 | 0.000233 |
| 18439     | P2rx7         | purinergic receptor P2X, ligand-gated ion channel, 7               | -3.38647 | 0.000235 |
| 66878     | Riok3         | RIO kinase 3                                                       | -0.66011 | 0.000235 |
| 102637087 | Gm33989       | predicted gene, 33989                                              | 0.98511  | 0.000236 |
| 100043911 | Ppp4r1l-ps    | protein phosphatase 4, regulatory subunit 1-like, pseudogene       | 0.957222 | 0.000236 |
| 22253     | Unc5c         | unc-5 netrin receptor C                                            | -4.40856 | 0.000236 |
| 72154     | Zfp157        | zinc finger protein 157                                            | 0.798371 | 0.000236 |
| 16180     | Il1rap        | interleukin 1 receptor accessory protein                           | 0.974564 | 0.000236 |
| 74782     | Glt8d2        | glycosyltransferase 8 domain containing 2                          | -1.00456 | 0.00024  |

|           |            |                                                                    |          |          |
|-----------|------------|--------------------------------------------------------------------|----------|----------|
| 13841     | Epha7      | Eph receptor A7                                                    | 1.611523 | 0.000241 |
| 23971     | Paps1      | 3'-phosphoadenosine 5'-phosphosulfate synthase 1                   | -1.01943 | 0.000242 |
| 11548     | Adra1b     | adrenergic receptor, alpha 1b                                      | -1.66521 | 0.000242 |
| 68734     | PPP4r3a    | protein phosphatase 4 regulatory subunit 3A                        | 0.797327 | 0.000242 |
| 18811     | Prl2c2     | prolactin family 2, subfamily c, member 2                          | -5.93363 | 0.000243 |
| 233899    | Ccdc189    | coiled-coil domain containing 189                                  | -1.54204 | 0.000244 |
| 224111    | Ubxn7      | UBX domain protein 7                                               | 0.822717 | 0.000247 |
| 68755     | Cgrrf1     | cell growth regulator with ring finger domain 1                    | -1.06901 | 0.000249 |
| 229949    | Ak5        | adenylate kinase 5                                                 | 1.086419 | 0.00025  |
| 102635721 | Gm26651    | predicted gene, 26651                                              | -5.65891 | 0.00025  |
| 246154    | Vasn       | vasorin                                                            | 0.972043 | 0.000251 |
| 226123    | Morn4      | MORN repeat containing 4                                           | -1.21558 | 0.000252 |
| 66455     | Cnpy4      | canopy GGF signaling regulator 4                                   | -0.88126 | 0.000254 |
| 11826     | Aqp1       | aquaporin 1                                                        | -2.98068 | 0.000254 |
| 17874     | Myd88      | myeloid differentiation primary response gene 88                   | 0.853521 | 0.000255 |
| 107770    | Tm6sf2     | transmembrane 6 superfamily member 2                               | 2.17962  | 0.000258 |
| 20585     | Hltf       | helicase-like transcription factor                                 | -0.86028 | 0.000259 |
| 16952     | Anxa1      | annexin A1                                                         | -1.04987 | 0.000261 |
| 52123     | Agpat5     | 1-acylglycerol-3-phosphate O-acyltransferase 5 (lysophosphatidic   | -0.773   | 0.000262 |
| 74043     | Pex26      | peroxisomal biogenesis factor 26                                   | 0.836523 | 0.000266 |
| 50935     | St6galnac6 | ST6 (alpha-N-acetyl-neuraminyl-2,3-beta-galactosyl-1,3)-N-acetyl   | -0.69672 | 0.000266 |
| 56847     | Aldh1a3    | aldehyde dehydrogenase family 1, subfamily A3                      | 3.446249 | 0.00027  |
| 74123     | Foxp4      | forkhead box P4                                                    | 0.614868 | 0.000272 |
| 71778     | Klhl5      | kelch-like 5                                                       | -1.00895 | 0.000273 |
| 18823     | Plp1       | proteolipid protein (myelin) 1                                     | 1.465978 | 0.000274 |
| 11666     | Abcd1      | ATP-binding cassette, sub-family D (ALD), member 1                 | -0.61357 | 0.000275 |
| 668253    | Dleu2      | deleted in lymphocytic leukemia, 2                                 | 1.786213 | 0.000276 |
| 12450     | Ccng1      | cyclin G1                                                          | -1.14902 | 0.000277 |
| 54725     | Cadm1      | cell adhesion molecule 1                                           | -3.63458 | 0.000277 |
| 12418     | Cbx4       | chromobox 4                                                        | 0.847605 | 0.000278 |
| 104001    | Rtn1       | reticulum 1                                                        | 0.91674  | 0.000281 |
| 13640     | EfnA5      | ephrin A5                                                          | 1.581752 | 0.000281 |
| 67179     | Ccdc25     | coiled-coil domain containing 25                                   | -0.68352 | 0.000283 |
| 12173     | Bnc1       | basoonuclin 1                                                      | 1.727825 | 0.000284 |
| 56706     | Ccnl1      | cyclin L1                                                          | 0.804519 | 0.000289 |
| 319604    | Fam168a    | family with sequence similarity 168, member A                      | 1.117961 | 0.000296 |
| 59043     | Wsb2       | WD repeat and SOCS box-containing 2                                | -0.83154 | 0.000296 |
| 104886    | Rab15      | RAB15, member RAS oncogene family                                  | 1.454997 | 0.000296 |
| 140577    | Ankrd6     | ankyrin repeat domain 6                                            | -2.10174 | 0.000299 |
| 72562     | Pcbd2      | pterin 4 alpha carbinolamine dehydratase/dimerization cofactor     | -1.36153 | 0.000299 |
| 672511    | Rnf213     | ring finger protein 213                                            | 1.904185 | 0.0003   |
| 74580     | Pyroxd2    | pyridine nucleotide-disulphide oxidoreductase domain 2             | 1.316017 | 0.000301 |
| 13666     | Eif2ak3    | eukaryotic translation initiation factor 2 alpha kinase 3          | -0.64701 | 0.000301 |
| 71492     | Bbs7       | Bardet-Biedl syndrome 7 (human)                                    | -0.73751 | 0.000303 |
| 64051     | Sv2a       | synaptic vesicle glycoprotein 2 a                                  | 1.278881 | 0.000303 |
| 16633     | Klra2      | killer cell lectin-like receptor, subfamily A, member 2            | -1.44423 | 0.000304 |
| 56312     | Nupr1      | nuclear protein transcription regulator 1                          | -2.73106 | 0.000312 |
| 14118     | Fbn1       | fibrillin 1                                                        | -1.04671 | 0.000315 |
| 68219     | Nudt21     | nudix (nucleoside diphosphate linked moiety X)-type motif 21       | 0.688187 | 0.000316 |
| 70240     | Ufsp1      | UFM1-specific peptidase 1                                          | -1.19898 | 0.000318 |
| 76482     | Rmc1       | regulator of MON1-CCZ1                                             | -0.76045 | 0.000319 |
| 229595    | Adamts14   | ADAMTS-like 4                                                      | -1.10785 | 0.000323 |
| 17713     | Grpel1     | GrpE-like 1, mitochondrial                                         | -0.72362 | 0.000324 |
| 100504048 | NA         | NA                                                                 | 2.47926  | 0.00033  |
| 20723     | Serpnb9    | serine (or cysteine) peptidase inhibitor, clade B, member 9        | -1.60999 | 0.000332 |
| 66371     | Chmp4c     | charged multivesicular body protein 4C                             | -1.57922 | 0.000332 |
| 12457     | Noct       | nocturnin                                                          | -1.70872 | 0.000334 |
| 677289    | Prr33      | proline rich 33                                                    | -1.45535 | 0.000336 |
| 22287     | Scgb1a1    | secretoglobin, family 1A, member 1 (uteroglobin)                   | 6.074122 | 0.000336 |
| 230726    | Rhbdl2     | rhomboid like 2                                                    | -3.62541 | 0.000341 |
| 54394     | Crif3      | cytokine receptor-like factor 3                                    | -0.69977 | 0.000344 |
| 242939    | Cpz        | carboxypeptidase Z                                                 | 2.182387 | 0.000349 |
| 74513     | Neto2      | neuroligin (NRP) and tolloid (TLL)-like 2                          | 1.278642 | 0.00035  |
| 21425     | Tfeb       | transcription factor EB                                            | 0.697504 | 0.00035  |
| 14677     | Gnai1      | guanine nucleotide binding protein (G protein), alpha inhibiting 1 | -0.98457 | 0.000353 |
| 106861    | Abhd3      | abhydrolase domain containing 3                                    | -1.98574 | 0.000354 |
| 217410    | Trib2      | tribbles pseudokinase 2                                            | 1.568763 | 0.000354 |
| 27984     | Efh2       | EF hand domain containing 2                                        | -0.98651 | 0.000354 |
| 216148    | Shc2       | SHC (Src homology 2 domain containing) transforming protein 2      | -1.80159 | 0.000356 |
| 381511    | Pdp1       | pyruvate dehydrogenase phosphatase catalytic subunit 1             | 1.228152 | 0.000357 |
| 319723    | NA         | NA                                                                 | 5.600546 | 0.000358 |
| 234365    | Yjefn3     | Yjef N-terminal domain containing 3                                | 1.665674 | 0.000362 |
| 12332     | Capg       | capping protein (actin filament), gelsolin-like                    | -1.99114 | 0.000364 |
| 56375     | B4gal4     | UDP-Gal:betaGlcNAc beta 1,4-galactosyltransferase, polypeptide     | 1.77539  | 0.000365 |
| 105245801 | Gm41192    | predicted gene, 41192                                              | 5.020938 | 0.000365 |

|           |                |                                                              |          |          |
|-----------|----------------|--------------------------------------------------------------|----------|----------|
| 57278     | Bcam           | basal cell adhesion molecule                                 | -1.75232 | 0.000367 |
| 14676     | Gna15          | guanine nucleotide binding protein, alpha 15                 | -2.98135 | 0.000367 |
| 50527     | Ero1a          | endoplasmic reticulum oxidoreductase 1 alpha                 | -1.09484 | 0.000369 |
| 56209     | Gde1           | glycerophosphodiester phosphodiesterase 1                    | -1.23649 | 0.000369 |
| 192678    | Rassf3         | Ras association (RalGDS/AF-6) domain family member 3         | -1.46428 | 0.000371 |
| 67509     | Saysd1         | SAYSVFN motif domain containing 1                            | -1.79404 | 0.000371 |
| 21886     | Tle2           | transducin-like enhancer of split 2                          | 0.913869 | 0.000371 |
| 17907     | Mylpf          | myosin light chain, phosphorylatable, fast skeletal muscle   | -2.75189 | 0.000374 |
| 14299     | Ncs1           | neuronal calcium sensor 1                                    | -0.86541 | 0.000374 |
| 19241     | Tmsb4x         | thymosin, beta 4, X chromosome                               | -2.10374 | 0.000379 |
| 67432     | Hoga1          | 4-hydroxy-2-oxoglutarate aldolase 1                          | -1.68235 | 0.00038  |
| 320951    | Pisd           | phosphatidylserine decarboxylase                             | -0.88206 | 0.000381 |
| 243548    | Prickle2       | prickle planar cell polarity protein 2                       | 0.96551  | 0.000387 |
| 52335     | Atxn1l         | ataxin 1-like                                                | 0.882373 | 0.000388 |
| 107986    | Ddb2           | damage specific DNA binding protein 2                        | 1.374439 | 0.000389 |
| 223693    | Tmem184b       | transmembrane protein 184b                                   | -0.65658 | 0.000391 |
| 319899    | Dock6          | dedicator of cytokinesis 6                                   | 0.717836 | 0.000393 |
| 627626    | Ptchd4         | patched domain containing 4                                  | 1.52874  | 0.0004   |
| 21857     | Timp1          | tissue inhibitor of metalloproteinase 1                      | -1.14685 | 0.000407 |
| 594843    | Has2os         | hyaluronan synthase 2, opposite strand                       | 4.717525 | 0.00042  |
| 94092     | Trim16         | tripartite motif-containing 16                               | -1.85912 | 0.000421 |
| 319839    | A530020G20RIK  | RIKEN cDNA A530020G20 gene                                   | 1.624539 | 0.000424 |
| 14469     | Gbp2           | guanylate binding protein 2                                  | -1.7688  | 0.000433 |
| 56838     | Ccl28          | chemokine (C-C motif) ligand 28                              | -4.50242 | 0.000436 |
| 78600     | Pde6h          | phosphodiesterase 6H, cGMP-specific, cone, gamma             | -5.348   | 0.000436 |
| 67998     | Retreg3        | reticulophagy regulator family member 3                      | 0.650546 | 0.000442 |
| 74521     | Ppp4r4         | protein phosphatase 4, regulatory subunit 4                  | 1.668506 | 0.000443 |
| 667214    | 9930111J21RIK1 | RIKEN cDNA 9930111J21 gene 1                                 | -3.23742 | 0.000445 |
| 56357     | Ivd            | isovaleryl coenzyme A dehydrogenase                          | 0.801761 | 0.000447 |
| 23808     | Ash2l          | ASH2 like histone lysine methyltransferase complex subunit   | 0.715253 | 0.000448 |
| 58911     | Sumf1          | sulfatase modifying factor 1                                 | -1.14916 | 0.000454 |
| 20713     | Serpini1       | serine (or cysteine) peptidase inhibitor, clade I, member 1  | -2.32404 | 0.000458 |
| 27055     | Fkbp9          | FK506 binding protein 9                                      | -0.98999 | 0.000461 |
| 14789     | P3h3           | prolyl 3-hydroxylase 3                                       | -1.2225  | 0.000463 |
| 67511     | Tmed9          | transmembrane p24 trafficking protein 9                      | -1.04139 | 0.000465 |
| 57764     | Ntn4           | netrin 4                                                     | -2.14058 | 0.000467 |
| 257633    | Acsf3          | acyl-CoA synthetase family member 3                          | 0.745305 | 0.000467 |
| 93694     | Clec2d         | C-type lectin domain family 2, member d                      | -1.14208 | 0.000487 |
| 77519     | Zfp266         | zinc finger protein 266                                      | 0.774965 | 0.000488 |
| 74257     | Tspan17        | tetraspanin 17                                               | -1.64612 | 0.000491 |
| 217082    | Hlf            | hepatic leukemia factor                                      | 3.431107 | 0.000491 |
| 71955     | Ist1           | increased sodium tolerance 1 homolog (yeast)                 | 0.668377 | 0.000493 |
| 229877    | Rap1gds1       | RAP1, GTP-GDP dissociation stimulator 1                      | -1.00024 | 0.000496 |
| 72042     | Cotl1          | coactosin-like 1 (Dictyostelium)                             | 1.780362 | 0.000502 |
| 21923     | Tnc            | tenascin C                                                   | -1.14657 | 0.000507 |
| 16470     | Ush1g          | USH1 protein network component sans                          | 3.442466 | 0.000507 |
| 59288     | Dctn5          | dynactin 5                                                   | -0.83023 | 0.000507 |
| 14366     | Fzd4           | frizzled class receptor 4                                    | 1.525058 | 0.000509 |
| 21814     | Tgfbf3         | transforming growth factor, beta receptor III                | 1.08401  | 0.000516 |
| 72061     | Aopep          | aminopeptidase O                                             | -1.64261 | 0.000517 |
| 619645    | Gm6089         | RRS1 ribosome biogenesis regulator homolog pseudogene        | 4.016362 | 0.000521 |
| 70423     | Tspan15        | tetraspanin 15                                               | 1.028224 | 0.000527 |
| 102634244 | Platr16        | pluripotency associated transcript 16                        | 5.525785 | 0.000536 |
| 67554     | Slc25a30       | solute carrier family 25, member 30                          | 1.101307 | 0.000536 |
| 338371    | Endov          | endonuclease V                                               | 1.104352 | 0.000539 |
| 12445     | Ccnd3          | cyclin D3                                                    | -0.64049 | 0.000541 |
| 233802    | Thumpd1        | THUMP domain containing 1                                    | -0.82058 | 0.000543 |
| 235431    | Coro2b         | coronin, actin binding protein, 2B                           | 1.189255 | 0.000556 |
| 68559     | Pdrg1          | p53 and DNA damage regulated 1                               | -0.84541 | 0.000557 |
| 380714    | Rph3al         | rabphilin 3A-like (without C2 domains)                       | 2.500189 | 0.000557 |
| 66222     | Serpnb1a       | serine (or cysteine) peptidase inhibitor, clade B, member 1a | -2.7046  | 0.000557 |
| 212073    | Syne3          | spectrin repeat containing, nuclear envelope family member 3 | -2.73386 | 0.00056  |
| 12062     | Bdkrb2         | bradykinin receptor, beta 2                                  | -5.22976 | 0.000577 |
| 74164     | Nfx1           | nuclear transcription factor, X-box binding 1                | 0.719052 | 0.000583 |
| 407793    | BC039966       | cDNA sequence BC039966                                       | 5.63348  | 0.000583 |
| 30938     | Fgd3           | FYVE, RhoGEF and PH domain containing 3                      | -1.64363 | 0.000588 |
| 12334     | Capn2          | calpain 2                                                    | -0.81695 | 0.000588 |
| 217325    | Llg12          | LLGL2 scribble cell polarity complex component               | 1.17214  | 0.000588 |
| 404634    | Macroh2a2      | macroH2A.2 histone                                           | 1.002956 | 0.000597 |
| 666571    | Gm8170         | glyceraldehyde-3-phosphate dehydrogenase pseudogene          | 3.204494 | 0.000598 |
| 68618     | Eola1          | endothelium and lymphocyte associated ASCH domain 1          | -0.68216 | 0.000601 |
| 71887     | Ppm1j          | protein phosphatase 1j                                       | -2.9447  | 0.000609 |
| 66448     | Mrpl20         | mitochondrial ribosomal protein L20                          | -1.07271 | 0.00061  |
| 70713     | Gpr137c        | G protein-coupled receptor 137C                              | -3.69489 | 0.000616 |
| 240025    | Dact2          | dishevelled-binding antagonist of beta-catenin 2             | 3.051846 | 0.00062  |

|           |               |                                                                  |          |          |
|-----------|---------------|------------------------------------------------------------------|----------|----------|
| 217473    | Ankmy2        | ankyrin repeat and MYND domain containing 2                      | 0.758727 | 0.000625 |
| 16782     | Lamc2         | laminin, gamma 2                                                 | -1.41253 | 0.000628 |
| 26360     | Angptl2       | angiopoietin-like 2                                              | -1.71059 | 0.000631 |
| 13000     | Csnk2a2       | casein kinase 2, alpha prime polypeptide                         | 0.69059  | 0.000633 |
| 66863     | Lztr1         | leucine-zipper-like transcriptional regulator, 1                 | 0.706249 | 0.000642 |
| 69539     | Trnp1         | TMF1-regulated nuclear protein 1                                 | -1.88999 | 0.000654 |
| 56707     | Zfp111        | zinc finger protein 111                                          | 0.686305 | 0.00066  |
| 97423     | R74862        | expressed sequence R74862                                        | -1.14064 | 0.000663 |
| 93882     | Pcdhb11       | protocadherin beta 11                                            | 1.742496 | 0.000663 |
| 108167690 | Gm26797       | predicted gene, 26797                                            | 1.836192 | 0.000667 |
| 14013     | Mecom         | MDS1 and EV1 complex locus                                       | -1.2276  | 0.000668 |
| 239027    | Arhgap22      | Rho GTPase activating protein 22                                 | -2.00794 | 0.00067  |
| 50915     | Grb14         | growth factor receptor bound protein 14                          | 1.005483 | 0.000674 |
| 69480     | Ttc9          | tetratricopeptide repeat domain 9                                | 1.840518 | 0.000682 |
| 66356     | Knop1         | lysine rich nucleolar protein 1                                  | -1.08321 | 0.000682 |
| 105841    | Dennd3        | DENN/MADD domain containing 3                                    | 1.49431  | 0.000683 |
| 12616     | Cenpb         | centromere protein B                                             | -0.66501 | 0.000689 |
| 239554    | Foxred2       | FAD-dependent oxidoreductase domain containing 2                 | 1.134982 | 0.000703 |
| 216152    | Plppr3        | phospholipid phosphatase related 3                               | 2.511818 | 0.000703 |
| 74315     | Rnf145        | ring finger protein 145                                          | -0.78574 | 0.000707 |
| 142682    | Zcchc14       | zinc finger, CCHC domain containing 14                           | 1.176997 | 0.000717 |
| 381983    | Lmtk3         | lemur tyrosine kinase 3                                          | 1.274219 | 0.000726 |
| 80879     | Slc16a3       | solute carrier family 16 (monocarboxylic acid transporters), mem | -2.719   | 0.000729 |
| 67893     | Tmem86a       | transmembrane protein 86A                                        | -1.21714 | 0.000729 |
| 12411     | Cbs           | cystathionine beta-synthase                                      | 1.989069 | 0.000732 |
| 100504591 | Gm15987       | predicted gene 15987                                             | -3.84063 | 0.000736 |
| 100126795 | Gm10575       | predicted gene 10575                                             | -1.37351 | 0.000748 |
| 100040421 | Gm2762        | predicted gene 2762                                              | -4.63539 | 0.000752 |
| 75801     | 4930447C04Rik | RIKEN cDNA 4930447C04 gene                                       | 3.700804 | 0.00076  |
| 320609    | Strip2        | striatin interacting protein 2                                   | 2.67203  | 0.000761 |
| 12931     | Crif1         | cytokine receptor-like factor 1                                  | -2.76983 | 0.000763 |
| 194237    | Rimk1a        | ribosomal modification protein rimK-like family member A         | 3.90264  | 0.000768 |
| 12295     | Cacnb1        | calcium channel, voltage-dependent, beta 1 subunit               | 1.016754 | 0.000787 |
| 20499     | Slc12a7       | solute carrier family 12, member 7                               | 1.516533 | 0.000787 |
| 76900     | Ssbp4         | single stranded DNA binding protein 4                            | 0.942022 | 0.000787 |
| 18605     | Enpp1         | ectonucleotide pyrophosphatase/phosphodiesterase 1               | -2.50557 | 0.000791 |
| 14489     | Mtpn          | myotrophin                                                       | -0.67946 | 0.000792 |
| 13429     | Dnm1          | dynamitin 1                                                      | 1.522444 | 0.000793 |
| 71665     | Fuca1         | fucosidase, alpha-L- 1, tissue                                   | -1.31637 | 0.000793 |
| 17955     | Nap114        | nucleosome assembly protein 1-like 4                             | -0.73203 | 0.000797 |
| 237253    | Lrp11         | low density lipoprotein receptor-related protein 11              | -1.41068 | 0.000805 |
| 93703     | Pcdhgb6       | protocadherin gamma subfamily B, 6                               | -2.42823 | 0.000806 |
| 14155     | Fem1b         | fem 1 homolog b                                                  | 0.701409 | 0.000807 |
| 13200     | Ddost         | dolichyl-di-phosphooligosaccharide-protein glycotransferase      | -0.80986 | 0.000812 |
| 243312    | Elfn1         | leucine rich repeat and fibronectin type III, extracellular 1    | -2.43877 | 0.000812 |
| 226999    | Slc9a2        | solute carrier family 9 (sodium/hydrogen exchanger), member 2    | 3.27728  | 0.000816 |
| 13508     | Dscam         | DS cell adhesion molecule                                        | 2.904827 | 0.000825 |
| 114249    | Npnt          | nephronectin                                                     | -2.06747 | 0.000825 |
| 100043792 | NA            | NA                                                               | -3.76543 | 0.000826 |
| 83486     | Rbm5          | RNA binding motif protein 5                                      | 0.722552 | 0.000841 |
| 12934     | Dpysl2        | dihydropyrimidinase-like 2                                       | -0.97592 | 0.000848 |
| 268747    | Carmil3       | capping protein regulator and myosin 1 linker 3                  | 1.25234  | 0.000851 |
| 69884     | 2010300F17Rik | RIKEN cDNA 2010300F17 gene                                       | -2.84855 | 0.000855 |
| 71338     | Tprg          | transformation related protein 63 regulated                      | 2.894277 | 0.00086  |
| 271786    | Galnt13       | polypeptide N-acetylgalactosaminyltransferase 13                 | 2.666192 | 0.000867 |
| 233571    | P2ry6         | pyrimidinergic receptor P2Y, G-protein coupled, 6                | -2.72333 | 0.00087  |
| 66890     | Lman2         | lectin, mannose-binding 2                                        | -0.69097 | 0.000874 |
| 72284     | LTO1          | ABCE maturation factor                                           | -0.86001 | 0.000875 |
| 55983     | Pdzrn3        | PDZ domain containing RING finger 3                              | -1.13617 | 0.000875 |
| 77938     | Fam53b        | family with sequence similarity 53, member B                     | -0.99005 | 0.000879 |
| 12404     | Cbln1         | cerebellin 1 precursor protein                                   | 5.170766 | 0.000886 |
| 77427     | 9430092D12Rik | RIKEN cDNA 9430092D12 gene                                       | 5.325605 | 0.000893 |
| 97114     | H3c15         | H3 clustered histone 15                                          | -2.84787 | 0.000893 |
| 102132    | E230013L22Rik | RIKEN cDNA E230013L22 gene                                       | 1.86907  | 0.0009   |
| 18733     | Pirb          | paired Ig-like receptor B                                        | -3.13318 | 0.000904 |
| 71952     | Riox1         | ribosomal oxygenase 1                                            | 0.760254 | 0.000904 |
| 215627    | Zbtb8b        | zinc finger and BTB domain containing 8b                         | 4.304578 | 0.000906 |
| 333670    | Gm867         | predicted gene 867                                               | 5.545561 | 0.000906 |
| 100952    | Emilin1       | elastin microfibril interfacer 1                                 | -0.80714 | 0.000908 |
| 66848     | Fuca2         | fucosidase, alpha-L- 2, plasma                                   | -0.97468 | 0.000917 |
| 74011     | Slc25a27      | solute carrier family 25, member 27                              | 1.911435 | 0.000923 |
| 13120     | Cyp4b1        | cytochrome P450, family 4, subfamily b, polypeptide 1            | 4.883612 | 0.000923 |
| 18987     | Pou2f2        | POU domain, class 2, transcription factor 2                      | -3.90189 | 0.000929 |
| 20254     | Scg2          | secretogranin II                                                 | 2.953961 | 0.000936 |
| 73024     | Emc7          | ER membrane protein complex subunit 7                            | -0.78629 | 0.000942 |

|           |               |                                                                     |          |          |
|-----------|---------------|---------------------------------------------------------------------|----------|----------|
| 100038582 | Gm10824       | predicted gene 10824                                                | 2.282259 | 0.000943 |
| 233733    | Galnt18       | polypeptide N-acetylgalactosaminyltransferase 18                    | -1.99462 | 0.000956 |
| 213019    | Pdlim2        | PDZ and LIM domain 2                                                | -1.39473 | 0.000964 |
| 68815     | Btbd10        | BTB (POZ) domain containing 10                                      | -0.73861 | 0.000964 |
| 69660     | Tmbim1        | transmembrane BAX inhibitor motif containing 1                      | -0.97829 | 0.00097  |
| 233280    | Nipa1         | non imprinted in Prader-Willi/Angelman syndrome 1 homolog (h        | -1.02679 | 0.000979 |
| 71885     | Faap100       | Fanconi anemia core complex associated protein 100                  | 1.224276 | 0.00098  |
| 17760     | Map6          | microtubule-associated protein 6                                    | -1.65323 | 0.000984 |
| 100042577 | Gm3912        | predicted gene 3912                                                 | 3.720323 | 0.000994 |
| 17388     | Mmp15         | matrix metalloproteinase 15                                         | -2.15388 | 0.000995 |
| 69368     | Wdfy1         | WD repeat and FYVE domain containing 1                              | 0.672251 | 0.000997 |
| 22223     | Uchl1         | ubiquitin carboxy-terminal hydrolase L1                             | -2.55159 | 0.000998 |
| 12702     | Socs3         | suppressor of cytokine signaling 3                                  | 1.048652 | 0.000999 |
| 20979     | Syt1          | synaptotagmin I                                                     | 2.585839 | 0.001007 |
| 227731    | Slc25a25      | solute carrier family 25 (mitochondrial carrier, phosphate carrier, | -0.66553 | 0.001016 |
| 100038720 | Gm10425       | predicted gene 10425                                                | 1.952939 | 0.00102  |
| 110173    | Manba         | mannosidase, beta A, lysosomal                                      | -0.96819 | 0.001026 |
| 268860    | Abat          | 4-aminobutyrate aminotransferase                                    | 0.976495 | 0.00104  |
| 21949     | Tnfsf8        | tumor necrosis factor (ligand) superfamily, member 8                | -3.3817  | 0.001045 |
| 16664     | Krt14         | keratin 14                                                          | 3.963188 | 0.001055 |
| 74013     | Rftn2         | raftlin family member 2                                             | -1.64698 | 0.001057 |
| 50490     | Nox4          | NADPH oxidase 4                                                     | -1.56862 | 0.001068 |
| 17268     | Meis1         | Meis homeobox 1                                                     | 1.094729 | 0.001071 |
| 14865     | Gstm4         | glutathione S-transferase, mu 4                                     | -1.0783  | 0.001072 |
| 53328     | Pgrmc1        | progesterone receptor membrane component 1                          | -0.8878  | 0.001082 |
| 192187    | Stab1         | stabilin 1                                                          | -2.88406 | 0.001084 |
| 22160     | Twist1        | twist basic helix-loop-helix transcription factor 1                 | 1.732388 | 0.001087 |
| 330267    | Thsd7a        | thrombospondin, type I, domain containing 7A                        | 1.594687 | 0.0011   |
| 76686     | Clip3         | CAP-GLY domain containing linker protein 3                          | -0.92612 | 0.001104 |
| 70155     | Ogfr1         | opioid growth factor receptor-like 1                                | -1.16094 | 0.001107 |
| 76477     | Pcolce2       | procollagen C-endopeptidase enhancer 2                              | 3.123772 | 0.001117 |
| 78787     | Usp54         | ubiquitin specific peptidase 54                                     | 1.861554 | 0.001117 |
| 20389     | Sftpc         | surfactant associated protein C                                     | 6.092957 | 0.001133 |
| 56554     | Raet1d        | retinoic acid early transcript delta                                | -2.26563 | 0.001138 |
| 237336    | Tbpl1         | TATA box binding protein-like 1                                     | 1.074838 | 0.00114  |
| 68449     | Tbc1d10b      | TBC1 domain family, member 10b                                      | -0.63729 | 0.001141 |
| 104271    | Tex15         | testis expressed gene 15                                            | -3.15483 | 0.001144 |
| 76187     | Adhfe1        | alcohol dehydrogenase, iron containing, 1                           | 2.109288 | 0.001187 |
| 212528    | Trmt1         | tRNA methyltransferase 1                                            | 0.791336 | 0.001192 |
| 58203     | Zbp1          | Z-DNA binding protein 1                                             | -2.81203 | 0.001192 |
| 70227     | Zfp619        | zinc finger protein 619                                             | 1.072837 | 0.001192 |
| 21924     | Tnnc1         | troponin C, cardiac/slow skeletal                                   | -1.53836 | 0.001195 |
| 20911     | Stxbp2        | syntaphin binding protein 2                                         | 1.511497 | 0.001202 |
| 11819     | Nr2f2         | nuclear receptor subfamily 2, group F, member 2                     | -0.84175 | 0.001208 |
| 192287    | Slc25a36      | solute carrier family 25, member 36                                 | 0.77691  | 0.001213 |
| 11302     | Aatk          | apoptosis-associated tyrosine kinase                                | 2.993783 | 0.001232 |
| 11853     | Rhoc          | ras homolog family member C                                         | -0.83716 | 0.001232 |
| 68986     | Gad1os        | glutamate decarboxylase 1, opposite strand                          | -5.75772 | 0.001247 |
| 242608    | Podn          | podocan                                                             | -2.73067 | 0.001252 |
| 53322     | Nucb2         | nucleobindin 2                                                      | -1.79018 | 0.001258 |
| 227933    | Ccdc148       | coiled-coil domain containing 148                                   | 1.443982 | 0.001259 |
| 17524     | Mpp1          | membrane protein, palmitoylated                                     | -1.11181 | 0.001259 |
| 229011    | Samd10        | sterile alpha motif domain containing 10                            | -1.313   | 0.001259 |
| 18049     | Ngf           | nerve growth factor                                                 | -1.45732 | 0.001268 |
| 58801     | Pmaip1        | phorbol-12-myristate-13-acetate-induced protein 1                   | -1.15062 | 0.001269 |
| 330260    | Pon2          | paraoxonase 2                                                       | -1.06664 | 0.001272 |
| 241324    | Crb2          | crumbs family member 2                                              | 1.632758 | 0.001277 |
| 18163     | Ctnnd2        | catenin (cadherin associated protein), delta 2                      | -2.89614 | 0.001279 |
| 230904    | Fbxo2         | F-box protein 2                                                     | 2.133155 | 0.001285 |
| 69784     | 1500009L16Rik | RIKEN cDNA 1500009L16 gene                                          | -2.89191 | 0.00129  |
| 12550     | Cdh1          | cadherin 1                                                          | 2.796578 | 0.00129  |
| 58869     | Pex5l         | peroxisomal biogenesis factor 5-like                                | -2.21168 | 0.001291 |
| 71240     | Osbpl7        | oxysterol binding protein-like 7                                    | 0.914109 | 0.001303 |
| 18452     | P4ha2         | procollagen-proline, 2-oxoglutarate 4-dioxygenase (proline 4-hyd    | -1.14186 | 0.001307 |
| 20646     | Snrpn         | small nuclear ribonucleoprotein N                                   | -1.86958 | 0.001307 |
| 381680    | Nxpe5         | neuraxophilin and PC-esterase domain family, member 5               | -3.95777 | 0.001317 |
| 12815     | Col11a2       | collagen, type XI, alpha 2                                          | 1.957394 | 0.001321 |
| 57295     | Icmt          | isoprenylcysteine carboxyl methyltransferase                        | -0.80789 | 0.001328 |
| 353025    | Caps2         | calcylphosphine 2                                                   | -4.77306 | 0.001358 |
| 67775     | Rtp4          | receptor transporter protein 4                                      | -3.28866 | 0.001366 |
| 94282     | Sfxn5         | sideroflexin 5                                                      | 0.866384 | 0.001372 |
| 56295     | Higd1a        | HIG1 domain family, member 1A                                       | -1.50318 | 0.001373 |
| 22142     | Tuba1a        | tubulin, alpha 1A                                                   | -1.06501 | 0.001375 |
| 64297     | Gprc5b        | G protein-coupled receptor, family C, group 5, member B             | -1.69973 | 0.001385 |
| 232174    | Cyp26b1       | cytochrome P450, family 26, subfamily b, polypeptide 1              | -2.77208 | 0.001392 |

|           |               |                                                                   |          |          |
|-----------|---------------|-------------------------------------------------------------------|----------|----------|
| 68709     | Cilp2         | cartilage intermediate layer protein 2                            | 2.767548 | 0.001395 |
| 12321     | Calu          | calumenin                                                         | -0.72377 | 0.001399 |
| 237887    | Slfn10-ps     | schlafen 10, pseudogene                                           | 1.703913 | 0.001403 |
| 621430    | Vmn2r79       | vomeronasal 2, receptor 79                                        | -6.80601 | 0.001435 |
| 100417675 | Nlrp5-ps      | NLR family, pyrin domain containing 5, pseudogene                 | -3.55857 | 0.001436 |
| 109019    | Nabp1         | nucleic acid binding protein 1                                    | -0.894   | 0.001457 |
| 70054     | Ccdc89        | coiled-coil domain containing 89                                  | -2.25017 | 0.00146  |
| 11787     | Apbb2         | amyloid beta (A4) precursor protein-binding, family B, member 2   | -0.69241 | 0.001466 |
| 17912     | Myo1b         | myosin IB                                                         | -1.88201 | 0.00149  |
| 12286     | Cacna1a       | calcium channel, voltage-dependent, P/Q type, alpha 1A subunit    | -1.32468 | 0.001494 |
| 68166     | Spire1        | spire type actin nucleation factor 1                              | -1.3274  | 0.001505 |
| 27204     | Syn3          | synapsin III                                                      | 1.52682  | 0.001505 |
| 66861     | Dnajc10       | DnaJ heat shock protein family (Hsp40) member C10                 | -0.78082 | 0.001521 |
| 56360     | Acot9         | acyl-CoA thioesterase 9                                           | -0.89529 | 0.001526 |
| 72401     | Slc43a1       | solute carrier family 43, member 1                                | 1.136448 | 0.001527 |
| 14173     | Fgf2          | fibroblast growth factor 2                                        | -1.2421  | 0.001532 |
| 18738     | Pitpna        | phosphatidylinositol transfer protein, alpha                      | -0.77025 | 0.001535 |
| 11550     | Adra1d        | adrenergic receptor, alpha 1d                                     | -1.92778 | 0.00155  |
| 223881    | Rnd1          | Rho family GTPase 1                                               | -1.2699  | 0.001552 |
| 12125     | Bcl2l11       | BCL2-like 11 (apoptosis facilitator)                              | 1.415138 | 0.001554 |
| 105246807 | Gm42031       | predicted gene, 42031                                             | 5.406556 | 0.001576 |
| 11997     | Akr1b7        | aldo-keto reductase family 1, member B7                           | 4.269279 | 0.001597 |
| 170756    | Slc8b1        | solute carrier family 8 (sodium/lithium/calcium exchanger), mem   | -0.76848 | 0.001611 |
| 75742     | 6820402A03Rik | RIKEN cDNA 6820402A03 gene                                        | 3.438364 | 0.001612 |
| 75345     | Slamf7        | SLAM family member 7                                              | -6.00316 | 0.001614 |
| 244666    | Sprtn         | SprT-like N-terminal domain                                       | 0.745558 | 0.001619 |
| 67306     | Zc2hc1a       | zinc finger, C2HC-type containing 1A                              | -1.24244 | 0.001657 |
| 381967    | Gm26705       | predicted gene, 26705                                             | -4.45271 | 0.001657 |
| 22658     | Pcgf2         | polycomb group ring finger 2                                      | 0.83733  | 0.001657 |
| 217344    | Rhbdf2        | rhomboid 5 homolog 2                                              | -1.01892 | 0.001687 |
| 242083    | Ppm1l         | protein phosphatase 1 (formerly 2C)-like                          | 1.788382 | 0.001706 |
| 12266     | C3            | complement component 3                                            | 2.60199  | 0.001708 |
| 102423    | Hinfp         | histone H4 transcription factor                                   | 0.918548 | 0.001708 |
| 22066     | Trpc4         | transient receptor potential cation channel, subfamily C, membe   | 3.902154 | 0.001716 |
| 70784     | Rasl12        | RAS-like, family 12                                               | -2.11668 | 0.001719 |
| 18596     | Pdgfrb        | platelet derived growth factor receptor, beta polypeptide         | -0.96916 | 0.001733 |
| 66120     | Fkbp11        | FK506 binding protein 11                                          | -0.79861 | 0.001738 |
| 68691     | Kansl1l       | KAT8 regulatory NSL complex subunit 1-like                        | 1.236079 | 0.001761 |
| 93708     | Pcdhgc5       | protocadherin gamma subfamily C, 5                                | 0.978654 | 0.001761 |
| 75985     | Rab30         | RAB30, member RAS oncogene family                                 | -1.17164 | 0.001762 |
| 217843    | Unc79         | unc-79 homolog                                                    | 4.976641 | 0.001762 |
| 11979     | Atp7b         | ATPase, Cu++ transporting, beta polypeptide                       | 2.027294 | 0.001763 |
| 67972     | Atp2b1        | ATPase, Ca++ transporting, plasma membrane 1                      | -0.77751 | 0.001788 |
| 74769     | Pik3cb        | phosphatidylinositol-4,5-bisphosphate 3-kinase catalytic subunit  | 0.890087 | 0.001792 |
| 70458     | 2610318N02Rik | RIKEN cDNA 2610318N02 gene                                        | -3.25738 | 0.001795 |
| 69387     | Dnajb13       | DnaJ heat shock protein family (Hsp40) member B13                 | 1.979707 | 0.001795 |
| 18655     | Pgk1          | phosphoglycerate kinase 1                                         | -1.18651 | 0.001795 |
| 74901     | Kbtbd11       | kelch repeat and BTB (POZ) domain containing 11                   | 1.914605 | 0.001808 |
| 70432     | Rufy2         | RUN and FYVE domain-containing 2                                  | 0.832664 | 0.001811 |
| 13609     | S1pr1         | sphingosine-1-phosphate receptor 1                                | -1.43381 | 0.001812 |
| 72371     | 2210408I21Rik | RIKEN cDNA 2210408I21 gene                                        | -0.91016 | 0.001824 |
| 80750     | N4bp1         | NEDD4 binding protein 1                                           | 1.087775 | 0.001824 |
| 18212     | Ntrk2         | neurotrophic tyrosine kinase, receptor, type 2                    | 5.213864 | 0.001824 |
| 329324    | Syt14         | synaptotagmin XIV                                                 | -4.00618 | 0.001824 |
| 20297     | Ccl20         | chemokine (C-C motif) ligand 20                                   | -4.71713 | 0.001827 |
| 12394     | Runx1         | runt related transcription factor 1                               | 0.634001 | 0.001835 |
| 319909    | Ism1          | isthmin 1, angiogenesis inhibitor                                 | -3.23548 | 0.001854 |
| 76282     | Gpt           | glutamic pyruvic transaminase, soluble                            | 0.859007 | 0.001857 |
| 108116    | Slco3a1       | solute carrier organic anion transporter family, member 3a1       | -1.65776 | 0.001857 |
| 93709     | Pcdhga1       | protocadherin gamma subfamily A, 1                                | -2.58955 | 0.00186  |
| 66143     | Eef1e1        | eukaryotic translation elongation factor 1 epsilon 1              | -0.77496 | 0.001866 |
| 56726     | Sh3bgrl       | SH3-binding domain glutamic acid-rich protein like                | -0.84969 | 0.001879 |
| 235674    | Acaa1b        | acetyl-Coenzyme A acyltransferase 1B                              | 1.76625  | 0.001885 |
| 93701     | Pcdhgb4       | protocadherin gamma subfamily B, 4                                | -2.15476 | 0.001885 |
| 24110     | Usp18         | ubiquitin specific peptidase 18                                   | -2.45726 | 0.001885 |
| 52398     | Septin11      | septin 11                                                         | -0.68515 | 0.001887 |
| 100044509 | Tgfb3l        | transforming growth factor, beta receptor III-like                | 2.232581 | 0.001914 |
| 13860     | Eps8          | epidermal growth factor receptor pathway substrate 8              | 1.000096 | 0.001917 |
| 73728     | Psd           | pleckstrin and Sec7 domain containing                             | 0.960083 | 0.001918 |
| 100504230 | NA            | NA                                                                | 1.498793 | 0.001929 |
| 382010    | Cep44         | centrosomal protein 44                                            | 0.695631 | 0.001934 |
| 214627    | Tent4b        | terminal nucleotidyltransferase 4B                                | 0.750317 | 0.001943 |
| 103098    | Slc6a15       | solute carrier family 6 (neurotransmitter transporter), member 15 | -4.6219  | 0.001946 |
| 100628593 | Mir5125       | microRNA 5125                                                     | 1.30899  | 0.001949 |
| 319812    | 9430018G01Rik | RIKEN cDNA 9430018G01 gene                                        | 2.148638 | 0.001954 |

|           |               |                                                                     |          |          |
|-----------|---------------|---------------------------------------------------------------------|----------|----------|
| 101994    | Champ1        | chromosome alignment maintaining phosphoprotein 1                   | 0.660707 | 0.001954 |
| 17231     | Mcpt8         | mast cell protease 8                                                | -4.44355 | 0.001954 |
| 81845     | Gpank1        | G patch domain and ankyrin repeats 1                                | -0.98584 | 0.001958 |
| 244911    | C2cd4a        | C2 calcium-dependent domain containing 4A                           | 5.092376 | 0.001976 |
| 13813     | Eomes         | eomesodermin                                                        | 3.076592 | 0.001976 |
| 17256     | Mea1          | male enhanced antigen 1                                             | -0.77029 | 0.001976 |
| 19085     | Prkar1b       | protein kinase, cAMP dependent regulatory, type I beta              | -1.68054 | 0.001976 |
| 56380     | Arid3b        | AT rich interactive domain 3B (BRIGHT-like)                         | 1.247198 | 0.001999 |
| 18019     | Nfatc2        | nuclear factor of activated T cells, cytoplasmic, calcineurin depen | -3.40124 | 0.002002 |
| 16155     | Il10rb        | interleukin 10 receptor, beta                                       | -0.9292  | 0.002004 |
| 68169     | Ndnf          | neuron-derived neurotrophic factor                                  | -2.30373 | 0.002004 |
| 18442     | P2ry2         | purinergic receptor P2Y, G-protein coupled 2                        | -1.44731 | 0.002004 |
| 22678     | Zfp2          | zinc finger protein 2                                               | 0.941148 | 0.002009 |
| 70552     | Lrrc56        | leucine rich repeat containing 56                                   | -1.21993 | 0.002015 |
| 12259     | C1qa          | complement component 1, q subcomponent, alpha polypeptide           | -4.61794 | 0.002038 |
| 22337     | Vdr           | vitamin D (1,25-dihydroxyvitamin D3) receptor                       | 1.431877 | 0.002038 |
| 54411     | Atp6ap1       | ATPase, H+ transporting, lysosomal accessory protein 1              | -0.79731 | 0.002042 |
| 23850     | Pappa2        | pappalysin 2                                                        | 1.351183 | 0.002045 |
| 57438     | Marchf7       | membrane associated ring-CH-type finger 7                           | 0.729958 | 0.002073 |
| 171508    | Crelb1        | cysteine-rich with EGF-like domains 1                               | -1.15926 | 0.002076 |
| 73739     | Cby1          | chibby family member 1, beta catenin antagonist                     | -0.68035 | 0.002082 |
| 227737    | Niban2        | niban apoptosis regulator 2                                         | -1.08626 | 0.002082 |
| 270109    | Pcnx2         | pecanex homolog 2                                                   | 3.221397 | 0.002104 |
| 17308     | Mgat1         | mannoside acetylglucosaminyltransferase 1                           | -0.9355  | 0.002105 |
| 320207    | Pik3r5        | phosphoinositide-3-kinase regulatory subunit 5                      | -1.05361 | 0.002105 |
| 234854    | Cdk10         | cyclin-dependent kinase 10                                          | 0.95371  | 0.002122 |
| 71519     | Cyp2u1        | cytochrome P450, family 2, subfamily u, polypeptide 1               | -1.43251 | 0.002132 |
| 329910    | Acot11        | acyl-CoA thioesterase 11                                            | -1.97021 | 0.002137 |
| 70508     | Bbx           | bobby sox HMG box containing                                        | 1.063513 | 0.002137 |
| 223864    | Rapgef3       | Rap guanine nucleotide exchange factor (GEF) 3                      | -0.83595 | 0.002137 |
| 16150     | Ikbkb         | inhibitor of kappaB kinase beta                                     | 0.654327 | 0.002146 |
| 57339     | Jph1          | junctophilin 1                                                      | 0.863104 | 0.002146 |
| 67088     | Cand2         | cullin-associated and neddylation-dissociated 2 (putative)          | 0.79664  | 0.002153 |
| 233895    | Prr14         | proline rich 14                                                     | -0.628   | 0.002158 |
| 66559     | Metap1d       | methionyl aminopeptidase type 1D (mitochondrial)                    | 0.992599 | 0.002168 |
| 244650    | Phlpp2        | PH domain and leucine rich repeat protein phosphatase 2             | 1.255655 | 0.002174 |
| 223922    | Atf7          | activating transcription factor 7                                   | 1.021335 | 0.002185 |
| 269437    | Plch1         | phospholipase C, eta 1                                              | 2.935269 | 0.002185 |
| 73737     | 1110008P14Rik | RIKEN cDNA 1110008P14 gene                                          | -1.0287  | 0.002207 |
| 13476     | Reep5         | receptor accessory protein 5                                        | -1.35744 | 0.002222 |
| 55932     | Gbp3          | guanylate binding protein 3                                         | -2.1119  | 0.002238 |
| 13063     | Cycs          | cytochrome c, somatic                                               | -0.94576 | 0.002239 |
| 19225     | Ptgs2         | prostaglandin-endoperoxide synthase 2                               | -2.59787 | 0.00227  |
| 17879     | Myh1          | myosin, heavy polypeptide 1, skeletal muscle, adult                 | -5.66345 | 0.002274 |
| 223453    | Dap           | death-associated protein                                            | -0.96821 | 0.002283 |
| 211286    | Cln5          | ceroid-lipofuscinosis, neuronal 5                                   | -0.66894 | 0.002287 |
| 319601    | Zfp653        | zinc finger protein 653                                             | 0.856459 | 0.002291 |
| 71776     | Tha1          | threonine aldolase 1                                                | 0.863369 | 0.002308 |
| 12443     | Ccnd1         | cyclin D1                                                           | -1.55477 | 0.002316 |
| 112422    | Zfp979        | zinc finger protein 979                                             | -2.33135 | 0.002316 |
| 208795    | Tmem63a       | transmembrane protein 63a                                           | 0.627032 | 0.002324 |
| 15959     | Ifit3         | interferon-induced protein with tetratricopeptide repeats 3         | -1.26578 | 0.00233  |
| 76633     | Lrmda         | leucine rich melanocyte differentiation associated                  | -1.22997 | 0.002337 |
| 320825    | Samd5         | sterile alpha motif domain containing 5                             | 2.536356 | 0.002345 |
| 67210     | Gatad1        | GATA zinc finger domain containing 1                                | -0.62002 | 0.002365 |
| 109225    | Ms4a7         | membrane-spanning 4-domains, subfamily A, member 7                  | -4.66968 | 0.002365 |
| 11668     | Aldh1a1       | aldehyde dehydrogenase family 1, subfamily A1                       | 1.605181 | 0.002369 |
| 15115     | Hars          | histidyl-tRNA synthetase                                            | -0.80046 | 0.002369 |
| 20908     | Stx3          | syntaxin 3                                                          | 0.872025 | 0.002369 |
| 77853     | Msl2          | MSL complex subunit 2                                               | 0.719687 | 0.002376 |
| 30046     | Zfp292        | zinc finger protein 292                                             | 0.92316  | 0.002377 |
| 241989    | Pabpc4l       | poly(A) binding protein, cytoplasmic 4-like                         | -1.80631 | 0.002411 |
| 23882     | Gadd45g       | growth arrest and DNA-damage-inducible 45 gamma                     | -1.55074 | 0.002415 |
| 102634822 | Gm11131       | predicted gene 11131                                                | 2.877535 | 0.002418 |
| 18104     | Nqo1          | NAD(P)H dehydrogenase, quinone 1                                    | -1.55905 | 0.002419 |
| 74549     | Mau2          | MAU2 sister chromatid cohesion factor                               | 0.930144 | 0.002425 |
| 76206     | Gpr165        | G protein-coupled receptor 165                                      | -3.97404 | 0.002445 |
| 100534273 | Fer1l5        | fer-1-like 5 (C. elegans)                                           | 1.454776 | 0.002476 |
| 67916     | Plpp3         | phospholipid phosphatase 3                                          | -1.08015 | 0.002476 |
| 13435     | Dnmt3a        | DNA methyltransferase 3A                                            | 1.048546 | 0.002481 |
| 107513    | Ssr1          | signal sequence receptor, alpha                                     | -0.69451 | 0.002482 |
| 54720     | Rcan1         | regulator of calcineurin 1                                          | -1.88332 | 0.002482 |
| 20349     | Sema3e        | sema domain, immunoglobulin domain (Ig), short basic domain, s      | 1.35804  | 0.0025   |
| 12722     | Clca3a1       | chloride channel accessory 3A1                                      | -1.78407 | 0.002501 |
| 18793     | Plaur         | plasminogen activator, urokinase receptor                           | -1.14629 | 0.002509 |



|           |               |                                                                    |          |          |
|-----------|---------------|--------------------------------------------------------------------|----------|----------|
| 74149     | Zfp946        | zinc finger protein 946                                            | -1.01771 | 0.002513 |
| 16818     | Lck           | lymphocyte protein tyrosine kinase                                 | 3.316054 | 0.002521 |
| 20751     | Spr           | sepiapterin reductase                                              | -0.61595 | 0.002571 |
| 237422    | Ric8b         | RIC8 guanine nucleotide exchange factor B                          | 1.005957 | 0.002581 |
| 73723     | Sh3bgr13      | SH3 domain binding glutamic acid-rich protein-like 3               | -1.00366 | 0.002583 |
| 269152    | Kif26b        | kinesin family member 26B                                          | 1.723996 | 0.002593 |
| 235050    | Zfp810        | zinc finger protein 810                                            | 1.250569 | 0.002609 |
| 56807     | Scamp5        | secretory carrier membrane protein 5                               | 0.902123 | 0.002614 |
| 54427     | Dnmt3l        | DNA (cytosine-5-)-methyltransferase 3-like                         | -1.78154 | 0.00262  |
| 56348     | Hsd17b12      | hydroxysteroid (17-beta) dehydrogenase 12                          | -0.71282 | 0.002629 |
| 104079    | Nxph3         | neurexophilin 3                                                    | -1.46481 | 0.002632 |
| 20293     | Ccl12         | chemokine (C-C motif) ligand 12                                    | -4.39976 | 0.002633 |
| 225288    | Rhod3         | formin homology 2 domain containing 3                              | -1.89212 | 0.002643 |
| 268880    | Xylt1         | xyloside xylosyltransferase 1                                      | -0.68598 | 0.002643 |
| 319572    | C730027H18Rik | RIKEN cDNA C730027H18 gene                                         | 3.793185 | 0.002657 |
| 225280    | Ino80c        | INO80 complex subunit C                                            | -0.703   | 0.002657 |
| 245607    | Gprasp2       | G protein-coupled receptor associated sorting protein 2            | 2.99971  | 0.002661 |
| 69094     | Tmem160       | transmembrane protein 160                                          | -1.2988  | 0.002666 |
| 56738     | Mocs1         | molybdenum cofactor synthesis 1                                    | 1.173231 | 0.002666 |
| 71973     | Rbpms2        | RNA binding protein with multiple splicing 2                       | -0.8527  | 0.002666 |
| 233805    | Dcun1d3       | DCN1, defective in cullin neddylation 1, domain containing 3 (S. c | -0.60672 | 0.002685 |
| 20536     | Slc4a3        | solute carrier family 4 (anion exchanger), member 3                | 0.730357 | 0.002687 |
| 233863    | Gtf3c1        | general transcription factor III C 1                               | -0.71291 | 0.002694 |
| 105661729 | Gm45925       | NLR family, pyrin domain containing 5 pseudogene                   | 3.266369 | 0.002697 |
| 668158    | Ccdc85c       | coiled-coil domain containing 85C                                  | 1.202075 | 0.002708 |
| 67830     | Rel1          | retention in endoplasmic reticulum sorting receptor 1              | -0.87497 | 0.00272  |
| 26893     | Cops6         | COP9 signalosome subunit 6                                         | -0.64098 | 0.002725 |
| 22272     | Uqcrcq        | ubiquinol-cytochrome c reductase, complex III subunit VII          | -1.10327 | 0.002725 |
| 68537     | Mrpl13        | mitochondrial ribosomal protein L13                                | -0.60976 | 0.002726 |
| 22352     | Vim           | vimentin                                                           | -0.65316 | 0.002741 |
| 11479     | Acvr1b        | activin A receptor, type 1B                                        | 0.887406 | 0.002751 |
| 378466    | Gm10033       | predicted gene 10033                                               | 1.302924 | 0.002765 |
| 241624    | Exd1          | exonuclease 3'-5' domain containing 1                              | -1.71153 | 0.002767 |
| 77827     | Krba1         | KRAB-A domain containing 1                                         | 0.887443 | 0.002769 |
| 241289    | Ppp1r26       | protein phosphatase 1, regulatory subunit 26                       | 1.248571 | 0.002769 |
| 214642    | Cped1         | cadherin-like and PC-esterase domain containing 1                  | -2.1784  | 0.002784 |
| 218877    | Sema3g        | sema domain, immunoglobulin domain (Ig), short basic domain, t     | -3.34828 | 0.002798 |
| 353172    | Gars          | glycyl-tRNA synthetase                                             | -0.60355 | 0.002808 |
| 67938     | Myl12b        | myosin, light chain 12B, regulatory                                | -1.24408 | 0.002815 |
| 102182    | Prmt9         | protein arginine methyltransferase 9                               | 0.605923 | 0.002822 |
| 117606    | Boc           | biregional cell adhesion molecule-related/down-regulated by onc    | 0.989856 | 0.002833 |
| 26440     | PsmA1         | proteasome subunit alpha 1                                         | -0.92852 | 0.002858 |
| 72137     | Wdsub1        | WD repeat, SAM and U-box domain containing 1                       | 0.684363 | 0.002859 |
| 73086     | Rps6ka5       | ribosomal protein S6 kinase, polypeptide 5                         | 1.354142 | 0.002867 |
| 224530    | Acat3         | acetyl-Coenzyme A acetyltransferase 3                              | 2.676266 | 0.002869 |
| 69354     | Slc38a4       | solute carrier family 38, member 4                                 | -3.74213 | 0.002892 |
| 16399     | Itga2b        | integrin alpha 2b                                                  | 1.231994 | 0.002904 |
| 72007     | Fndc3b        | fibronectin type III domain containing 3B                          | -0.7394  | 0.002909 |
| 320011    | Ugg1          | UDP-glucose glycoprotein glucosyltransferase 1                     | -0.64521 | 0.002915 |
| 12400     | Cbfb          | core binding factor beta                                           | 0.670631 | 0.002915 |
| 211548    | Nomo1         | nodal modulator 1                                                  | -0.82063 | 0.002915 |
| 269831    | Tspan12       | tetraspanin 12                                                     | -1.46635 | 0.002915 |
| 19240     | Tmsb10        | thymosin, beta 10                                                  | -1.38551 | 0.002933 |
| 105827    | Amigo2        | adhesion molecule with Ig like domain 2                            | 1.485584 | 0.002942 |
| 22152     | Tubb3         | tubulin, beta 3 class III                                          | -1.66908 | 0.002942 |
| 231633    | Tmem119       | transmembrane protein 119                                          | -1.31002 | 0.002953 |
| 235180    | Fez1          | fasciculation and elongation protein zeta 1 (zyglin I)             | -1.17588 | 0.002971 |
| 13608     | Edar          | ectodysplasin-A receptor                                           | -4.85638 | 0.002977 |
| 13998     | Fgd6          | FYVE, RhoGEF and PH domain containing 6                            | -1.34853 | 0.00299  |
| 11846     | Arg1          | arginase, liver                                                    | -3.57322 | 0.003029 |
| 78304     | Naa38         | N(alpha)-acetyltransferase 38, NatC auxiliary subunit              | -0.64546 | 0.00304  |
| 238057    | Gdf7          | growth differentiation factor 7                                    | 1.886802 | 0.003048 |
| 18129     | Notch2        | notch 2                                                            | 0.612626 | 0.003048 |
| 100532    | Rel1          | REL1-like 1                                                        | -0.89957 | 0.003051 |
| 13660     | Ehd1          | EH-domain containing 1                                             | -0.74062 | 0.003052 |
| 319804    | Glt1d1        | glycosyltransferase 1 domain containing 1                          | 2.455909 | 0.003053 |
| 97086     | Slc9b2        | solute carrier family 9, subfamily B (NHA2, cation proton antiport | -4.04079 | 0.003072 |
| 243025    | Tmem156       | transmembrane protein 156                                          | -3.5548  | 0.003099 |
| 76453     | Prss23        | protease, serine 23                                                | -0.90213 | 0.003106 |
| 227736    | Cfap157       | cilia and flagella associated protein 157                          | -1.07087 | 0.003109 |
| 238252    | Gpr135        | G protein-coupled receptor 135                                     | -1.01838 | 0.003109 |
| 272347    | Zfp398        | zinc finger protein 398                                            | 0.748486 | 0.003109 |
| 56745     | C1qtnf1       | C1q and tumor necrosis factor related protein 1                    | 1.087854 | 0.003111 |
| 18221     | Nudc          | nudC nuclear distribution protein                                  | -0.62605 | 0.003191 |
| 16480     | Jup           | junction plakoglobin                                               | -0.93951 | 0.003216 |

|           |               |                                                                     |          |          |
|-----------|---------------|---------------------------------------------------------------------|----------|----------|
| 68396     | Nat8          | N-acetyltransferase 8 (GCN5-related)                                | 2.517506 | 0.003234 |
| 73904     | 4833412C05Rik | RIKEN cDNA 4833412C05 gene                                          | -3.22725 | 0.003249 |
| 67739     | Slc48a1       | solute carrier family 48 (heme transporter), member 1               | -1.09725 | 0.003253 |
| 50760     | Fbxo17        | F-box protein 17                                                    | -0.88551 | 0.003254 |
| 319179    | H2bc6         | H2B clustered histone 6                                             | -2.08643 | 0.003261 |
| 22409     | Wnt10a        | wingless-type MMTV integration site family, member 10A              | -5.20003 | 0.003261 |
| 227526    | Cdnf          | cerebral dopamine neurotrophic factor                               | -1.88738 | 0.003266 |
| 99712     | Cept1         | choline/ethanolaminephosphotransferase 1                            | -0.79334 | 0.003266 |
| 327812    | Gm15663       | predicted gene 15663                                                | -1.63166 | 0.003266 |
| 319984    | Jph4          | junctophilin 4                                                      | 1.534239 | 0.003266 |
| 18654     | Pgf           | placental growth factor                                             | -3.91336 | 0.003266 |
| 21412     | Tcf21         | transcription factor 21                                             | -2.40316 | 0.003266 |
| 78249     | Adgrf4        | adhesion G protein-coupled receptor F4                              | 2.275897 | 0.003268 |
| 75597     | Ndufaf2       | NADH:ubiquinone oxidoreductase complex assembly factor 2            | -0.91877 | 0.003268 |
| 76252     | Atp6v0e2      | ATPase, H+ transporting, lysosomal V0 subunit E2                    | 1.039021 | 0.003271 |
| 67838     | Dnajb11       | DnaJ heat shock protein family (Hsp40) member B11                   | -0.81234 | 0.003271 |
| 14051     | Eya4          | EYA transcriptional coactivator and phosphatase 4                   | 1.843869 | 0.003295 |
| 244867    | Arhgap20      | Rho GTPase activating protein 20                                    | 2.225488 | 0.003335 |
| 14457     | Gas7          | growth arrest specific 7                                            | -1.9737  | 0.003343 |
| 234138    | Tti2          | TELO2 interacting protein 2                                         | 0.765296 | 0.003431 |
| 109245    | Lrrc39        | leucine rich repeat containing 39                                   | -2.25062 | 0.003455 |
| 12454     | Ccnk          | cyclin K                                                            | 0.778845 | 0.003461 |
| 140491    | Ppp1r3a       | protein phosphatase 1, regulatory subunit 3A                        | -3.62019 | 0.003474 |
| 24059     | Slco2a1       | solute carrier organic anion transporter family, member 2a1         | -2.73407 | 0.003491 |
| 27096     | Trappc3       | trafficking protein particle complex 3                              | -0.88324 | 0.003499 |
| 15361     | Hmga1         | high mobility group AT-hook 1                                       | -1.55166 | 0.003501 |
| 67269     | Agtbbp1       | ATP/GTP binding protein 1                                           | -0.6641  | 0.003521 |
| 67883     | Uxs1          | UDP-glucuronate decarboxylase 1                                     | -0.67693 | 0.003535 |
| 93697     | Ice2          | interactor of little elongation complex ELL subunit 2               | 0.749025 | 0.003545 |
| 50911     | Exosc9        | exosome component 9                                                 | -0.74613 | 0.003548 |
| 218203    | Mylip         | myosin regulatory light chain interacting protein                   | -1.67019 | 0.003548 |
| 102640045 | Gm36211       | predicted gene, 36211                                               | -1.87575 | 0.003594 |
| 15273     | Hivep2        | human immunodeficiency virus type I enhancer binding protein 2      | 0.932037 | 0.003594 |
| 16905     | Lmna          | lamin A                                                             | -0.95225 | 0.003597 |
| 98878     | Ehd4          | EH-domain containing 4                                              | -1.06288 | 0.003627 |
| 268807    | Klhl38        | kelch-like 38                                                       | -4.67468 | 0.003657 |
| 69185     | Dtwd1         | DTW domain containing 1                                             | -1.27787 | 0.003669 |
| 54194     | Akap8l        | A kinase (PRKA) anchor protein 8-like                               | 0.946633 | 0.00367  |
| 76895     | Bicd2         | BICD cargo adaptor 2                                                | -0.62967 | 0.003673 |
| 106326    | Osbpl11       | oxysterol binding protein-like 11                                   | 0.662107 | 0.003673 |
| 140484    | Pofut1        | protein O-fucosyltransferase 1                                      | -1.00143 | 0.003673 |
| 67150     | Rnf141        | ring finger protein 141                                             | -0.76088 | 0.003673 |
| 68721     | 1110032A03Rik | RIKEN cDNA 1110032A03 gene                                          | -1.18174 | 0.003682 |
| 22029     | Traf1         | TNF receptor-associated factor 1                                    | -3.57521 | 0.00369  |
| 66960     | Mindy3        | MINDY lysine 48 deubiquitinase 3                                    | -1.02047 | 0.003692 |
| 20556     | Slnf2         | schlafen 2                                                          | -1.47807 | 0.003692 |
| 56376     | Pdlim5        | PDZ and LIM domain 5                                                | -0.85087 | 0.003699 |
| 15442     | Hpse          | heparanase                                                          | -2.26472 | 0.003705 |
| 194590    | Reps2         | RALBP1 associated Eps domain containing protein 2                   | 0.964511 | 0.003709 |
| 71699     | Slc41a3       | solute carrier family 41, member 3                                  | -0.80726 | 0.003723 |
| 21341     | Taf1c         | TATA-box binding protein associated factor, RNA polymerase I, C     | 0.691337 | 0.003727 |
| 71834     | Zbtb43        | zinc finger and BTB domain containing 43                            | 0.741975 | 0.003727 |
| 218629    | Dhx29         | DEAH (Asp-Glu-Ala-His) box polypeptide 29                           | -0.7607  | 0.003766 |
| 235300    | Tlcd5         | TLC domain containing 5                                             | 1.627959 | 0.003766 |
| 66648     | Tpgs2         | tubulin polyglutamylase complex subunit 2                           | -1.08276 | 0.003766 |
| 54473     | Tollip        | toll interacting protein                                            | -0.71068 | 0.003779 |
| 219105    | Zmym5         | zinc finger, MYM-type 5                                             | 0.667861 | 0.003783 |
| 104709    | Pik3r6        | phosphoinositide-3-kinase regulatory subunit 5                      | -2.55459 | 0.00379  |
| 140780    | Bmp2k         | BMP2 inducible kinase                                               | 0.914971 | 0.00379  |
| 227659    | Slc2a6        | solute carrier family 2 (facilitated glucose transporter), member 6 | -2.43364 | 0.00379  |
| 20768     | Sepsb2        | selenophosphate synthetase 2                                        | -0.97112 | 0.003796 |
| 211228    | Lrrc25        | leucine rich repeat containing 25                                   | -3.09973 | 0.003798 |
| 60533     | Cd274         | CD274 antigen                                                       | -1.13414 | 0.0038   |
| 380711    | Rap1gap2      | RAP1 GTPase activating protein 2                                    | -1.99618 | 0.003826 |
| 215446    | Entpd3        | ectonucleoside triphosphate diphosphohydrolase 3                    | 4.26303  | 0.003843 |
| 67760     | Slc38a2       | solute carrier family 38, member 2                                  | 0.828203 | 0.003843 |
| 235469    | Zfp280d       | zinc finger protein 280D                                            | 0.778424 | 0.003843 |
| 11863     | Arnt          | aryl hydrocarbon receptor nuclear translocator                      | 0.687347 | 0.003847 |
| 21927     | Tnfaip1       | tumor necrosis factor, alpha-induced protein 1 (endothelial)        | -0.67029 | 0.003847 |
| 260299    | Cadm4         | cell adhesion molecule 4                                            | -2.65891 | 0.003865 |
| 56347     | Eif3c         | eukaryotic translation initiation factor 3, subunit C               | -0.61879 | 0.003865 |
| 72828     | Ubash3b       | ubiquitin associated and SH3 domain containing, B                   | -1.45562 | 0.003865 |
| 320162    | Cep95         | centrosomal protein 95                                              | 0.879825 | 0.003881 |
| 27267     | Cars          | cysteinyl-tRNA synthetase                                           | -0.71246 | 0.003886 |
| 385658    | Nxpe3         | neurexophilin and PC-esterase domain family, member 3               | -1.0272  | 0.003902 |

|           |               |                                                                                |          |          |
|-----------|---------------|--------------------------------------------------------------------------------|----------|----------|
| 12262     | C1qc          | complement component 1, q subcomponent, C chain                                | -4.4898  | 0.003916 |
| 12395     | Runx1t1       | RUNX1 translocation partner 1                                                  | 0.83838  | 0.003928 |
| 234678    | D230025D16Rik | RIKEN cDNA D230025D16 gene                                                     | 0.841207 | 0.00395  |
| 98432     | Phlpp1        | PH domain and leucine rich repeat protein phosphatase 1                        | 0.777234 | 0.00395  |
| 229521    | Syt11         | synaptotagmin XI                                                               | -1.35051 | 0.00395  |
| 20742     | Sptbn1        | spectrin beta, non-erythrocytic 1                                              | -1.23266 | 0.003951 |
| 211135    | D130040H23Rik | RIKEN cDNA D130040H23 gene                                                     | 1.261309 | 0.003967 |
| 100503519 | Gm19744       | predicted gene, 19744                                                          | 4.527137 | 0.003974 |
| 229937    | Znhit6        | zinc finger, HIT type 6                                                        | -0.69531 | 0.003978 |
| 213393    | Depp1         | DEPP1 autophagy regulator                                                      | 2.760126 | 0.003989 |
| 243362    | Stard13       | StAR-related lipid transfer (START) domain containing 13                       | -0.60172 | 0.003993 |
| 73845     | Ankrd42       | ankyrin repeat domain 42                                                       | -1.03989 | 0.004001 |
| 68642     | Tmem216       | transmembrane protein 216                                                      | 0.803978 | 0.004027 |
| 67442     | Retsat        | retinol saturase (all trans retinol 13,14 reductase)                           | -1.2753  | 0.004058 |
| 224022    | Slc7a4        | solute carrier family 7 (cationic amino acid transporter, y+ system)           | 1.120261 | 0.004106 |
| 226778    | Mark1         | MAP/microtubule affinity regulating kinase 1                                   | 1.021626 | 0.00411  |
| 56527     | Mast1         | microtubule associated serine/threonine kinase 1                               | 2.387652 | 0.004128 |
| 66598     | NA            | NA                                                                             | 1.143511 | 0.004128 |
| 104252    | Cdc42ep2      | CDC42 effector protein (Rho GTPase binding) 2                                  | 0.767469 | 0.004129 |
| 15505     | Hsph1         | heat shock 105kDa/110kDa protein 1                                             | -0.67113 | 0.004132 |
| 74646     | Spsb1         | splA/ryanodine receptor domain and SOCS box containing 1                       | -0.96349 | 0.004132 |
| 21817     | Tgm2          | transglutaminase 2, C polypeptide                                              | -0.98597 | 0.004132 |
| 100037278 | Niban3        | niban apoptosis regulator 3                                                    | 1.723593 | 0.004157 |
| 80749     | Lfn1          | leucine rich repeat and fibronectin type III domain containing 1               | 1.119594 | 0.004172 |
| 58859     | Efemp2        | epidermal growth factor-containing fibulin-like extracellular matrix protein 2 | -0.8171  | 0.00418  |
| 75625     | Mageh1        | MAGE family member H1                                                          | -1.31687 | 0.004193 |
| 22174     | Tyro3         | TYRO3 protein tyrosine kinase 3                                                | -0.82129 | 0.004202 |
| 69894     | Fam241b       | family with sequence similarity 241, member B                                  | 1.54075  | 0.004211 |
| 83679     | Pde4dip       | phosphodiesterase 4D interacting protein (myomegalin)                          | -1.34591 | 0.004216 |
| 73173     | Pcdh18        | protocadherin 18                                                               | -2.03946 | 0.004219 |
| 14083     | Ptk2          | PTK2 protein tyrosine kinase 2                                                 | -0.71499 | 0.004235 |
| 268709    | Fam107a       | family with sequence similarity 107, member A                                  | 4.052729 | 0.004242 |
| 211429    | Pla2g4b       | phospholipase A2, group IVB (cytosolic)                                        | 1.586661 | 0.004248 |
| 270711    | Calhm4        | calcium homeostasis modulator family member 4                                  | 2.09401  | 0.004249 |
| 236069    | Gm13238       | carnitine deficiency-associated gene expressed in ventricle 3 protein          | 3.5302   | 0.004252 |
| 22793     | Zyx           | zyxin                                                                          | 0.872869 | 0.004252 |
| 330385    | 9530026P05Rik | RIKEN cDNA 9530026P05 gene                                                     | 1.467102 | 0.004252 |
| 226654    | Tstd1         | thiosulfate sulfurtransferase (rhodanese)-like domain containing 12            | 0.060425 | 0.004273 |
| 21351     | Taldo1        | transaldolase 1                                                                | -0.81162 | 0.004294 |
| 227923    | A930012O16Rik | RIKEN cDNA A930012O16 gene                                                     | -2.85744 | 0.004297 |
| 13664     | Eif1a         | eukaryotic translation initiation factor 1A                                    | -0.65547 | 0.004297 |
| 68404     | Nrn1          | neuritin 1                                                                     | -0.83217 | 0.004306 |
| 99887     | Tlcd4         | TLC domain containing 4                                                        | -3.07751 | 0.004334 |
| 56741     | Igdcc4        | immunoglobulin superfamily, DCC subclass, member 4                             | 0.797115 | 0.004358 |
| 17301     | Foxd2         | forkhead box D2                                                                | 1.880659 | 0.004359 |
| 18103     | Nme2          | NME/NM23 nucleoside diphosphate kinase 2                                       | -1.08796 | 0.004381 |
| 100034251 | Wfdc17        | WAP four-disulfide core domain 17                                              | -2.9739  | 0.004387 |
| 12850     | Coq7          | demethyl-Q 7                                                                   | -0.89287 | 0.004396 |
| 68024     | H2bc4         | H2B clustered histone 4                                                        | -1.69959 | 0.004396 |
| 12258     | Serping1      | serine (or cysteine) peptidase inhibitor, clade G, member 1                    | -1.67401 | 0.004414 |
| 14705     | Bsc12         | Berardinelli-Seip congenital lipodystrophy 2 (seipin)                          | -0.62965 | 0.004448 |
| 233902    | Fbxl19        | F-box and leucine-rich repeat protein 19                                       | -0.61406 | 0.004448 |
| 59022     | Edf1          | endothelial differentiation-related factor 1                                   | -0.68583 | 0.004448 |
| 14811     | Grin2a        | glutamate receptor, ionotropic, NMDA2A (epsilon 1)                             | -5.0862  | 0.004453 |
| 69440     | Dennd6b       | DENN/MADD domain containing 6B                                                 | 0.953074 | 0.004484 |
| 72634     | Tdrkh         | tudor and KH domain containing protein                                         | -1.647   | 0.004524 |
| 106052    | Fbxo4         | F-box protein 4                                                                | -0.80004 | 0.004579 |
| 12041     | Bckdk         | branched chain ketoacid dehydrogenase kinase                                   | -0.86932 | 0.004587 |
| 18590     | Pdgfra        | platelet derived growth factor, alpha                                          | -0.83679 | 0.004616 |
| 237781    | Mief2         | mitochondrial elongation factor 2                                              | -0.82443 | 0.004618 |
| 71738     | Mamdc2        | MAM domain containing 2                                                        | 1.511048 | 0.004623 |
| 17755     | Map1b         | microtubule-associated protein 1B                                              | -1.51796 | 0.004647 |
| 16669     | Krt19         | keratin 19                                                                     | -3.06201 | 0.004692 |
| 110829    | Lims1         | LIM and senescent cell antigen-like domains 1                                  | 0.757723 | 0.0047   |
| 21386     | Tbx3          | T-box 3                                                                        | -0.99548 | 0.004702 |
| 216543    | Cep68         | centrosomal protein 68                                                         | 0.62556  | 0.004721 |
| 227937    | Pkp4          | plakophilin 4                                                                  | 1.339558 | 0.004721 |
| 20409     | Ostf1         | osteoclast stimulating factor 1                                                | -0.89235 | 0.004724 |
| 17389     | Mmp16         | matrix metalloproteinase 16                                                    | -1.69355 | 0.004728 |
| 636741    | Zfp964        | zinc finger protein 964                                                        | 1.217497 | 0.004731 |
| 14726     | Pdprn         | podoplanin                                                                     | -1.07799 | 0.004752 |
| 16913     | Psmb8         | proteasome (prosome, macropain) subunit, beta type 8 (large subunit)           | 1.442308 | 0.004752 |
| 212514    | Spice1        | spindle and centriole associated protein 1                                     | 0.691507 | 0.004783 |
| 50788     | Fbxl8         | F-box and leucine-rich repeat protein 8                                        | 0.733885 | 0.004802 |
| 23832     | Xcr1          | chemokine (C motif) receptor 1                                                 | 2.122586 | 0.00482  |

|           |               |                                                                     |          |          |
|-----------|---------------|---------------------------------------------------------------------|----------|----------|
| 71544     | Arhgap42      | Rho GTPase activating protein 42                                    | -1.34666 | 0.004822 |
| 17349     | Mlf1          | myeloid leukemia factor 1                                           | -2.52631 | 0.004849 |
| 330369    | Fbxo41        | F-box protein 41                                                    | 1.097548 | 0.00489  |
| 378435    | Mafa          | v-maf musculoaponeurotic fibrosarcoma oncogene family, protei       | -2.38686 | 0.00489  |
| 18213     | Ntrk3         | neurotrophic tyrosine kinase, receptor, type 3                      | 1.978505 | 0.00489  |
| 72433     | Rab38         | RAB38, member RAS oncogene family                                   | -1.96722 | 0.00489  |
| 13603     | Opn3          | opsin 3                                                             | -2.2658  | 0.004901 |
| 69482     | Nup35         | nucleoporin 35                                                      | -0.71885 | 0.004912 |
| 77781     | Epm2aip1      | EPM2A (laforin) interacting protein 1                               | 0.787992 | 0.004914 |
| 66985     | Rassf7        | Ras association (RalGDS/AF-6) domain family (N-terminal) memb       | -1.43612 | 0.004956 |
| 225651    | Mppe1         | metallopheosphoesterase 1                                           | -0.89127 | 0.004962 |
| 12288     | Cacna1c       | calcium channel, voltage-dependent, L type, alpha 1C subunit        | 1.005603 | 0.00497  |
| 14538     | Gcnt2         | glucosaminyl (N-acetyl) transferase 2, l-branching enzyme           | -1.55612 | 0.00498  |
| 74463     | Exoc3l2       | exocyst complex component 3-like 2                                  | -4.29917 | 0.005013 |
| 14254     | Flt1          | FMS-like tyrosine kinase 1                                          | -1.43151 | 0.005025 |
| 212111    | Inpp5a        | inositol polyphosphate-5-phosphatase A                              | -1.23382 | 0.005029 |
| 399558    | Flrt2         | fibronectin leucine rich transmembrane protein 2                    | 1.25842  | 0.00503  |
| 57815     | Spta5         | spermatogenesis associated 5                                        | -0.77968 | 0.005031 |
| 71602     | Myo1e         | myosin IE                                                           | -1.11999 | 0.00505  |
| 12386     | Ctnna2        | catenin (cadherin associated protein), alpha 2                      | -3.90964 | 0.005054 |
| 240892    | Dusp27        | dual specificity phosphatase 27 (putative)                          | -1.88227 | 0.005088 |
| 252837    | Ackr4         | atypical chemokine receptor 4                                       | 2.062788 | 0.005106 |
| 14672     | Gna11         | guanine nucleotide binding protein, alpha 11                        | -0.77351 | 0.005111 |
| 12020     | Nkx3-2        | NK3 homeobox 2                                                      | 2.236674 | 0.005118 |
| 22421     | Wnt7a         | wingless-type MMTV integration site family, member 7A               | 3.567576 | 0.005118 |
| 233870    | Tufm          | Tu translation elongation factor, mitochondrial                     | -0.81846 | 0.00512  |
| 19249     | Ptpn13        | protein tyrosine phosphatase, non-receptor type 13                  | 0.93409  | 0.005141 |
| 211064    | Alkbh1        | alkB homolog 1, histone H2A dioxygenase                             | 0.720573 | 0.005157 |
| 239393    | Lrp12         | low density lipoprotein-related protein 12                          | -0.82379 | 0.005157 |
| 94066     | Mrpl36        | mitochondrial ribosomal protein L36                                 | -0.77216 | 0.005157 |
| 20515     | Slc20a1       | solute carrier family 20, member 1                                  | -0.74745 | 0.005157 |
| 270076    | Gcdh          | glutaryl-Coenzyme A dehydrogenase                                   | 0.657985 | 0.00516  |
| 622175    | E430024I08Rik | RIKEN cDNA E430024I08 gene                                          | 1.041223 | 0.00523  |
| 70729     | Nos1ap        | nitric oxide synthase 1 (neuronal) adaptor protein                  | 1.71586  | 0.005242 |
| 56016     | Hebp2         | heme binding protein 2                                              | -1.12967 | 0.005249 |
| 78439     | A930037H05Rik | RIKEN cDNA A930037H05 gene                                          | 1.485772 | 0.005268 |
| 66789     | Alg14         | asparagine-linked glycosylation 14                                  | -0.99353 | 0.005284 |
| 69724     | Rnaseh2a      | ribonuclease H2, large subunit                                      | 0.864452 | 0.005317 |
| 17954     | Nap1l2        | nucleosome assembly protein 1-like 2                                | -3.58821 | 0.005322 |
| 241494    | Zfp385b       | zinc finger protein 385B                                            | 2.652103 | 0.005322 |
| 26357     | Abcg2         | ATP binding cassette subfamily G member 2 (Junior blood group)      | -1.09646 | 0.005348 |
| 102638630 | Gm26779       | predicted gene, 26779                                               | 1.474828 | 0.005371 |
| 215798    | Adgrg6        | adhesion G protein-coupled receptor G6                              | -2.06598 | 0.005417 |
| 12257     | Tspo          | translocator protein                                                | -0.95919 | 0.005421 |
| 231871    | Daglb         | diacylglycerol lipase, beta                                         | -0.94286 | 0.005432 |
| 212483    | Fam193b       | family with sequence similarity 193, member B                       | 0.762374 | 0.005449 |
| 234593    | Ndr4          | N-myc downstream regulated gene 4                                   | -0.9945  | 0.005481 |
| 16363     | Irf2          | interferon regulatory factor 2                                      | 0.839661 | 0.005501 |
| 78816     | Gmip          | Gem-interacting protein                                             | 0.989296 | 0.005511 |
| 26879     | B3galnt1      | UDP-GalNAc:betaGlcNAc beta 1,3-galactosaminyltransferase, pol       | -1.81371 | 0.00554  |
| 242700    | Ifnlr1        | interferon lambda receptor 1                                        | 1.743105 | 0.005547 |
| 19012     | Plpp1         | phospholipid phosphatase 1                                          | -1.91498 | 0.0056   |
| 107975    | Pacs1         | phosphofurin acidic cluster sorting protein 1                       | 1.020821 | 0.0056   |
| 76775     | Slc10a7       | solute carrier family 10 (sodium/bile acid cotransporter family), r | 0.682668 | 0.005604 |
| 329777    | Pigk          | phosphatidylinositol glycan anchor biosynthesis, class K            | -1.05214 | 0.005628 |
| 14198     | Fhit          | fragile histidine triad gene                                        | -3.57633 | 0.005639 |
| 225609    | Gm9949        | predicted gene 9949                                                 | -1.49288 | 0.00564  |
| 54137     | Acrbp         | proacrosin binding protein                                          | 1.219689 | 0.005654 |
| 19737     | Rgs5          | regulator of G-protein signaling 5                                  | -5.16545 | 0.005675 |
| 102634096 | Gm11476       | predicted gene 11476                                                | -1.78493 | 0.005714 |
| 214742    | Rcor3         | REST corepressor 3                                                  | 0.692178 | 0.005723 |
| 20932     | Surf4         | surfeit gene 4                                                      | -0.6317  | 0.005749 |
| 16440     | Itpr3         | inositol 1,4,5-triphosphate receptor 3                              | 1.132774 | 0.005751 |
| 74153     | Uba7          | ubiquitin-like modifier activating enzyme 7                         | 0.951985 | 0.005775 |
| 58909     | Fam13a        | family with sequence similarity 13, member A                        | -2.66854 | 0.005787 |
| 14231     | Fkbp7         | FK506 binding protein 7                                             | -1.20022 | 0.005791 |
| 64658     | Mrps25        | mitochondrial ribosomal protein S25                                 | -0.62138 | 0.005845 |
| 257926    | Olfrr544      | olfactory receptor 544                                              | 4.513201 | 0.005845 |
| 383374    | Gm10557       | cadherin 11 pseudogene                                              | 0.972563 | 0.005886 |
| 66503     | 1810034E14Rik | RIKEN cDNA 1810034E14 gene                                          | -1.40308 | 0.005931 |
| 170759    | Atp13a1       | ATPase type 13A1                                                    | 0.68209  | 0.005931 |
| 227357    | Espnl         | espin-like                                                          | 2.490094 | 0.005931 |
| 21388     | Tbx5          | T-box 5                                                             | -1.06312 | 0.005954 |
| 52700     | Txndc17       | thioredoxin domain containing 17                                    | -0.75978 | 0.00596  |
| 319387    | Adgrl3        | adhesion G protein-coupled receptor L3                              | -6.04177 | 0.005961 |

|           |               |                                                                    |          |          |
|-----------|---------------|--------------------------------------------------------------------|----------|----------|
| 240095    | H2-M5         | histocompatibility 2, M region locus 5                             | 2.498193 | 0.005961 |
| 12816     | Col12a1       | collagen, type XII, alpha 1                                        | -2.03367 | 0.005975 |
| 16336     | InsI3         | insulin-like 3                                                     | 1.928923 | 0.005983 |
| 665119    | Sec14I5       | SEC14-like lipid binding 5                                         | -4.25482 | 0.005989 |
| 66520     | 2610001J05Rik | RIKEN cDNA 2610001J05 gene                                         | -0.91508 | 0.006012 |
| 216551    | LgalSI        | lectin, galactoside binding-like                                   | -1.71447 | 0.006056 |
| 103135    | Pan2          | PAN2 poly(A) specific ribonuclease subunit                         | 0.989375 | 0.006057 |
| 70719     | Arhgap45      | Rho GTPase activating protein 45                                   | -1.47909 | 0.00606  |
| 74518     | 8430419K02Rik | RIKEN cDNA 8430419K02 gene                                         | 1.889922 | 0.00606  |
| 27356     | InsI6         | insulin-like 6                                                     | -1.24883 | 0.00606  |
| 74356     | 4931428F04Rik | RIKEN cDNA 4931428F04 gene                                         | 1.218394 | 0.006102 |
| 328110    | Prpf39        | pre-mRNA processing factor 39                                      | 0.902876 | 0.006102 |
| 72003     | Synpr         | synaptoporin                                                       | -2.44261 | 0.006108 |
| 107589    | Myk           | myosin, light polypeptide kinase                                   | 2.483338 | 0.006126 |
| 54195     | Gucy1b1       | guanylate cyclase 1, soluble, beta 1                               | -2.16566 | 0.006141 |
| 77516     | 9330198N18Rik | RIKEN cDNA 9330198N18 gene                                         | 4.585353 | 0.006152 |
| 100417422 | Gm16574       | RAN GTPase activating protein 1 pseudogene                         | 3.280312 | 0.006156 |
| 66892     | Eif4e3        | eukaryotic translation initiation factor 4E member 3               | -2.01373 | 0.006174 |
| 12366     | Casp2         | caspase 2                                                          | 1.127388 | 0.006181 |
| 11966     | Atp6v1b2      | ATPase, H+ transporting, lysosomal V1 subunit B2                   | 0.984591 | 0.006197 |
| 80281     | Ctnnbp2nl     | CTTNBP2 N-terminal like                                            | -0.97697 | 0.006197 |
| 20115     | Rps7          | ribosomal protein S7                                               | 0.811804 | 0.006197 |
| 210356    | Nckap5        | NCK-associated protein 5                                           | 0.976717 | 0.006223 |
| 26939     | Polr3e        | polymerase (RNA) III (DNA directed) polypeptide E                  | -0.65463 | 0.006286 |
| 217353    | Tmc6          | transmembrane channel-like gene family 6                           | -0.97264 | 0.006286 |
| 68203     | Diras2        | DIRAS family, GTP-binding RAS-like 2                               | -2.53046 | 0.006296 |
| 18951     | Septin5       | septin 5                                                           | -0.69673 | 0.006296 |
| 12521     | Cd82          | CD82 antigen                                                       | -0.99406 | 0.006299 |
| 72512     | Sting1        | stimulator of interferon response cGAMP interactor 1               | -0.67863 | 0.0063   |
| 58220     | Pard6b        | par-6 family cell polarity regulator beta                          | 1.457916 | 0.006304 |
| 18648     | Pgam1         | phosphoglycerate mutase 1                                          | -0.76581 | 0.006307 |
| 53620     | Vamp5         | vesicle-associated membrane protein 5                              | -0.75261 | 0.006309 |
| 18557     | Cdk18         | cyclin-dependent kinase 18                                         | -1.14005 | 0.006313 |
| 100910    | Chpf2         | chondroitin polymerizing factor 2                                  | -0.86726 | 0.006326 |
| 217331    | Unk           | unkempt family zinc finger                                         | 0.905704 | 0.006386 |
| 11747     | Anxa5         | annexin A5                                                         | -0.85566 | 0.006388 |
| 75599     | Pcdh1         | protocadherin 1                                                    | -2.35953 | 0.006394 |
| 192232    | Hps4          | HPS4, biogenesis of lysosomal organelles complex 3 subunit 2       | 0.747694 | 0.006438 |
| 319622    | Itipripl2     | inositol 1,4,5-triphosphate receptor interacting protein-like 2    | -1.25916 | 0.006511 |
| 13852     | Stx2          | syntaxin 2                                                         | -0.81767 | 0.006511 |
| 15586     | Hyal1         | hyaluronoglucosaminidase 1                                         | -0.997   | 0.006528 |
| 243910    | Nfkbid        | nuclear factor of kappa light polypeptide gene enhancer in B cells | 1.933236 | 0.006528 |
| 56517     | Slc22a21      | solute carrier family 22 (organic cation transporter), member 21   | 0.954305 | 0.006528 |
| 230594    | Tut4          | terminal uridylyl transferase 4                                    | 0.976727 | 0.006528 |
| 620790    | Gm14443       | predicted gene 14443                                               | 1.297613 | 0.006533 |
| 80880     | Kank3         | KN motif and ankyrin repeat domains 3                              | -1.06831 | 0.006533 |
| 72333     | Palld         | palladin, cytoskeletal associated protein                          | 0.945378 | 0.006533 |
| 18121     | Nog           | noggin                                                             | -3.43099 | 0.006538 |
| 22781     | Ikzf4         | IKAROS family zinc finger 4                                        | 1.506597 | 0.006543 |
| 212517    | Cfap44        | cilia and flagella associated protein 44                           | 3.298344 | 0.006558 |
| 57782     | Rbak          | RB-associated KRAB zinc finger                                     | 0.812293 | 0.006558 |
| 224860    | Plcl2         | phospholipase C-like 2                                             | -1.71751 | 0.006568 |
| 76808     | Rpl18a        | ribosomal protein L18A                                             | 0.904447 | 0.006573 |
| 14187     | Akr1b8        | aldo-keto reductase family 1, member B8                            | -0.79039 | 0.006686 |
| 60440     | Iigp1         | interferon inducible GTPase 1                                      | -2.63814 | 0.006688 |
| 11732     | Ank           | progressive ankylosis                                              | -0.89594 | 0.006817 |
| 225888    | Kmt5b         | lysine methyltransferase 5B                                        | 0.740222 | 0.006832 |
| 192950    | Nacad         | NAC alpha domain containing                                        | -1.51343 | 0.006838 |
| 224650    | Anks1         | ankyrin repeat and SAM domain containing 1                         | 0.854577 | 0.00685  |
| 13874     | Ereg          | epiregulin                                                         | -1.71855 | 0.006869 |
| 234515    | Inpp4b        | inositol polyphosphate-4-phosphatase, type II                      | -2.7606  | 0.006869 |
| 80284     | Ssmim12       | small integral membrane protein 12                                 | -0.99932 | 0.006869 |
| 54352     | Irx5          | Iroquois homeobox 5                                                | 1.550148 | 0.006872 |
| 30957     | Mapk8ip3      | mitogen-activated protein kinase 8 interacting protein 3           | 0.926464 | 0.006927 |
| 64293     | Stk32b        | serine/threonine kinase 32B                                        | -5.69799 | 0.006933 |
| 327956    | Vmo1          | vitelline membrane outer layer 1 homolog (chicken)                 | -4.72745 | 0.006943 |
| 319160    | H4c12         | H4 clustered histone 12                                            | 2.0166   | 0.006962 |
| 73608     | Marveld3      | MARVEL (membrane-associating) domain containing 3                  | 4.467536 | 0.006964 |
| 212285    | Arap2         | ArfGAP with RhoGAP domain, ankyrin repeat and PH domain 2          | 1.184693 | 0.006972 |
| 319650    | A430108G06Rik | RIKEN cDNA A430108G06 gene                                         | -4.49632 | 0.007043 |
| 76820     | Cyria         | CYFIP related Rac1 interactor A                                    | -1.25727 | 0.007043 |
| 237178    | Ppef1         | protein phosphatase with EF hand calcium-binding domain 1          | -4.47367 | 0.007043 |
| 21961     | Tns1          | tensin 1                                                           | -1.07457 | 0.007043 |
| 170737    | Znrf1         | zinc and ring finger 1                                             | 0.632294 | 0.007062 |
| 100417679 | Gm17709       | ornithine decarboxylase, structural 1 pseudogene                   | 1.523819 | 0.007063 |

|           |               |                                                                 |          |          |
|-----------|---------------|-----------------------------------------------------------------|----------|----------|
| 212307    | Mapre2        | microtubule-associated protein, RP/EB family, member 2          | -0.66762 | 0.007063 |
| 246198    | Mllt6         | myeloid/lymphoid or mixed-lineage leukemia; translocated to, 6  | 0.736078 | 0.007119 |
| 14264     | Fmod          | fibromodulin                                                    | -1.05959 | 0.007126 |
| 75965     | Zdhhc20       | zinc finger, DHHC domain containing 20                          | -0.64594 | 0.007137 |
| 68588     | Cthrc1        | collagen triple helix repeat containing 1                       | -5.15974 | 0.007145 |
| 231430    | Cox18         | cytochrome c oxidase assembly protein 18                        | -0.60059 | 0.007159 |
| 21822     | Tgtp1         | T cell specific GTPase 1                                        | -2.47736 | 0.007159 |
| 211770    | Trib1         | tribbles pseudokinase 1                                         | 1.089666 | 0.007159 |
| 19143     | St14          | suppression of tumorigenicity 14 (colon carcinoma)              | -2.15773 | 0.007168 |
| 108902    | B4gat1        | beta-1,4-glucuronyltransferase 1                                | -0.9127  | 0.007172 |
| 56036     | Ccnl2         | cyclin L2                                                       | 0.641812 | 0.007176 |
| 18577     | Pde4a         | phosphodiesterase 4A, cAMP specific                             | 0.626849 | 0.007176 |
| 209773    | Dennd2a       | DENN/MADD domain containing 2A                                  | -0.60982 | 0.00718  |
| 353190    | Edc3          | enhancer of mRNA decapping 3                                    | 0.670096 | 0.00718  |
| 13116     | Cyp46a1       | cytochrome P450, family 46, subfamily a, polypeptide 1          | 1.329    | 0.007196 |
| 105785    | Kdelr3        | KDEL (Lys-Asp-Glu-Leu) endoplasmic reticulum protein retention  | -1.08106 | 0.007196 |
| 320633    | Zbtb26        | zinc finger and BTB domain containing 26                        | 0.852477 | 0.007196 |
| 67946     | Spta6         | spermatogenesis associated 6                                    | -0.63328 | 0.007256 |
| 24075     | Taf10         | TATA-box binding protein associated factor 10                   | -0.66845 | 0.007273 |
| 68955     | Srrm4         | serine/arginine repetitive matrix 4                             | 2.32841  | 0.007277 |
| 271813    | Agbl2         | ATP/GTP binding protein-like 2                                  | -1.7641  | 0.007286 |
| 71777     | Ing3          | inhibitor of growth family, member 3                            | 0.680672 | 0.007294 |
| 109305    | Orai1         | ORAI calcium release-activated calcium modulator 1              | -0.79501 | 0.007312 |
| 67268     | Myl12a        | myosin, light chain 12A, regulatory, non-sarcomeric             | -0.95882 | 0.007318 |
| 66237     | Atp6v1g2      | ATPase, H+ transporting, lysosomal V1 subunit G2                | 0.839345 | 0.007358 |
| 56436     | Adrm1         | adhesion regulating molecule 1                                  | -0.69342 | 0.007363 |
| 56013     | Srcin1        | SRC kinase signaling inhibitor 1                                | 4.429298 | 0.00737  |
| 69769     | Tnfaip8l2     | tumor necrosis factor, alpha-induced protein 8-like 2           | -3.41814 | 0.007374 |
| 269016    | Sh3rf2        | SH3 domain containing ring finger 2                             | 1.565322 | 0.00738  |
| 93732     | Acox2         | acyl-Coenzyme A oxidase 2, branched chain                       | 3.447483 | 0.007384 |
| 108156    | Mthfd1        | methylenetetrahydrofolate dehydrogenase (NADP+ dependent),      | 1.240332 | 0.007468 |
| 72826     | Fam76b        | family with sequence similarity 76, member B                    | 0.750216 | 0.007493 |
| 226518    | Nmnat2        | nicotinamide nucleotide adenyltransferase 2                     | 1.092157 | 0.007505 |
| 76311     | 1110019D14Rik | RIKEN cDNA 1110019D14 gene                                      | -1.29352 | 0.007534 |
| 66273     | Aamdc         | adipogenesis associated Mth938 domain containing                | -1.28371 | 0.007534 |
| 100216343 | Gm17501       | predicted gene, 17501                                           | -1.21819 | 0.007534 |
| 21991     | Tpi1          | triosephosphate isomerase 1                                     | -0.85118 | 0.007534 |
| 18822     | Plod1         | procollagen-lysine, 2-oxoglutarate 5-dioxygenase 1              | -1.2523  | 0.007553 |
| 22762     | Zfpm2         | zinc finger protein, multitype 2                                | 0.86392  | 0.007563 |
| 239833    | Lmln          | leishmanolysin-like (metallopeptidase M8 family)                | 1.051076 | 0.007588 |
| 24004     | Rai2          | retinoic acid induced 2                                         | -2.30828 | 0.007588 |
| 232086    | Tmem150a      | transmembrane protein 150A                                      | 0.899778 | 0.007588 |
| 232413    | Clec12a       | C-type lectin domain family 12, member a                        | -2.90375 | 0.007593 |
| 80891     | Fcrls         | Fc receptor-like 5, scavenger receptor                          | -5.56303 | 0.007611 |
| 12282     | Hyou1         | hypoxia up-regulated 1                                          | -0.63723 | 0.007611 |
| 23917     | Impdh1        | inosine monophosphate dehydrogenase 1                           | -0.6909  | 0.007611 |
| 66464     | Taf12         | TATA-box binding protein associated factor 12                   | -0.76348 | 0.00764  |
| 78754     | Galnt15       | polypeptide N-acetylgalactosaminyltransferase 15                | 1.160907 | 0.007653 |
| 104346    | Gas8          | growth arrest specific 8                                        | 0.623097 | 0.007653 |
| 100503946 | Gm10925       | ATP synthase FO subunit 6 pseudogene                            | 0.806778 | 0.007653 |
| 19663     | Rbpms         | RNA binding protein gene with multiple splicing                 | 0.788173 | 0.007653 |
| 58185     | Rsad2         | radical S-adenosyl methionine domain containing 2               | -2.36351 | 0.007653 |
| 232801    | Lilra5        | leukocyte immunoglobulin-like receptor, subfamily A (with TM di | -5.19791 | 0.00768  |
| 68427     | Slc39a13      | solute carrier family 39 (metal ion transporter), member 13     | -0.8026  | 0.00768  |
| 15184     | Hdac5         | histone deacetylase 5                                           | 0.645493 | 0.007688 |
| 547150    | 6820431F20Rik | cadherin 11 pseudogene                                          | 0.91968  | 0.00774  |
| 67420     | Far1          | fatty acyl CoA reductase 1                                      | -0.74903 | 0.007818 |
| 71685     | Galnt14       | polypeptide N-acetylgalactosaminyltransferase 14                | -5.18463 | 0.007818 |
| 108699    | Chn1          | chimerin 1                                                      | -1.99757 | 0.007843 |
| 14082     | Fadd          | Fas (TNFRSF6)-associated via death domain                       | -0.60487 | 0.007852 |
| 12747     | Clk1          | CDC-like kinase 1                                               | 0.843806 | 0.007868 |
| 76737     | Crel2         | cysteine-rich with EGF-like domains 2                           | -1.11964 | 0.007905 |
| 67304     | 3110070M22Rik | RIKEN cDNA 3110070M22 gene                                      | -2.11983 | 0.007907 |
| 14293     | Fpr1          | formyl peptide receptor 1                                       | -5.71338 | 0.007961 |
| 22715     | Zfp57         | zinc finger protein 57                                          | 1.299216 | 0.007961 |
| 15220     | Foxq1         | forkhead box Q1                                                 | 1.794042 | 0.007965 |
| 68032     | Emc4          | ER membrane protein complex subunit 4                           | -0.65318 | 0.007973 |
| 18810     | Plec          | plectin                                                         | -0.98979 | 0.007973 |
| 77015     | Mpped2        | metallophosphoesterase domain containing 2                      | 2.697981 | 0.008007 |
| 57321     | Terf2ip       | telomeric repeat binding factor 2, interacting protein          | 0.721181 | 0.00803  |
| 236733    | Usp11         | ubiquitin specific peptidase 11                                 | 1.319386 | 0.008042 |
| 245877    | Map7d1        | MAP7 domain containing 1                                        | -0.79887 | 0.008046 |
| 67943     | Mesd          | mesoderm development LRP chaperone                              | -0.77138 | 0.008056 |
| 319183    | H2bc11        | H2B clustered histone 11                                        | -2.76545 | 0.008076 |
| 269424    | Jade1         | jade family PHD finger 1                                        | -0.68103 | 0.008076 |

|           |               |                                                                     |          |          |
|-----------|---------------|---------------------------------------------------------------------|----------|----------|
| 226422    | Rab29         | RAB29, member RAS oncogene family                                   | -0.9145  | 0.008086 |
| 70078     | Nol7          | nucleolar protein 7                                                 | -0.84538 | 0.008099 |
| 18709     | Pik3r2        | phosphoinositide-3-kinase regulatory subunit 2                      | 0.606886 | 0.00811  |
| 75767     | Rab11fip1     | RAB11 family interacting protein 1 (class I)                        | 1.252662 | 0.008132 |
| 12802     | Cnr2          | cannabinoid receptor 2 (macrophage)                                 | -3.29955 | 0.008144 |
| 13167     | Dbi           | diazepam binding inhibitor                                          | -1.09387 | 0.008148 |
| 72281     | Sh2d4a        | SH2 domain containing 4A                                            | -1.32416 | 0.00815  |
| 245857    | Ssh3          | slingshot protein phosphatase 3                                     | 0.962344 | 0.008152 |
| 58237     | Nkain4        | Na+/K+ transporting ATPase interacting 4                            | -1.34362 | 0.008156 |
| 107702    | Rnh1          | ribonuclease/angiogenin inhibitor 1                                 | -0.7648  | 0.008156 |
| 101943    | Sf3b3         | splicing factor 3b, subunit 3                                       | 0.675085 | 0.008165 |
| 109050    | Inka2         | inka box actin regulator 2                                          | -1.09361 | 0.008222 |
| 19244     | Ptp4a2        | protein tyrosine phosphatase 4a2                                    | -0.61154 | 0.008249 |
| 16324     | Inhbb         | inhibin beta-B                                                      | -1.51442 | 0.008255 |
| 77604     | Rbm12b2       | RNA binding motif protein 12 B2                                     | 0.785026 | 0.008261 |
| 60504     | Il21r         | interleukin 21 receptor                                             | -4.26762 | 0.00828  |
| 18993     | Pou3f3        | POU domain, class 3, transcription factor 3                         | -7.98379 | 0.00828  |
| 214601    | Slc10a3       | solute carrier family 10 (sodium/bile acid cotransporter family), r | -0.63399 | 0.008347 |
| 13682     | Eif4a2        | eukaryotic translation initiation factor 4A2                        | 0.864936 | 0.008353 |
| 100038548 | Gm10521       | predicted gene 10521                                                | -5.05941 | 0.00836  |
| 15483     | Hsd11b1       | hydroxysteroid 11-beta dehydrogenase 1                              | -2.40583 | 0.00836  |
| 11910     | Atf3          | activating transcription factor 3                                   | -1.25625 | 0.008377 |
| 93723     | Pcdhga11      | protocadherin gamma subfamily A, 11                                 | -3.41474 | 0.008377 |
| 58245     | Gpr180        | G protein-coupled receptor 180                                      | -0.90137 | 0.008391 |
| 329436    | Gm14461       | predicted gene 14461                                                | -4.47945 | 0.008394 |
| 67711     | Nsmce1        | NSE1 homolog, SMC5-SMC6 complex component                           | -1.11545 | 0.008423 |
| 78248     | Armcx1        | armadillo repeat containing, X-linked 1                             | -0.71769 | 0.008433 |
| 56372     | 1110004F10Rik | RIKEN cDNA 1110004F10 gene                                          | -0.73921 | 0.008438 |
| 70209     | Tmem143       | transmembrane protein 143                                           | -0.76052 | 0.008438 |
| 66269     | Tmed6         | transmembrane p24 trafficking protein 6                             | 4.045875 | 0.008446 |
| 330216    | Mblac1        | metallo-beta-lactamase domain containing 1                          | -1.75552 | 0.008462 |
| 76804     | Kdm4c         | lysine (K)-specific demethylase 4C                                  | 0.680876 | 0.008471 |
| 99382     | Abtb2         | ankyrin repeat and BTB (POZ) domain containing 2                    | -1.29802 | 0.008479 |
| 213484    | Nudt18        | nudix (nucleoside diphosphate linked moiety X)-type motif 18        | -0.98044 | 0.008504 |
| 14219     | Ccn2          | cellular communication network factor 2                             | -1.97803 | 0.008548 |
| 327978    | Slfm5         | schlafen 5                                                          | 1.934592 | 0.008548 |
| 77975     | Tmem50b       | transmembrane protein 50B                                           | -0.82183 | 0.008552 |
| 13134     | Dach1         | dachshund family transcription factor 1                             | -3.89028 | 0.008602 |
| 98711     | Rdh10         | retinol dehydrogenase 10 (all-trans)                                | -0.71332 | 0.008602 |
| 20408     | Sh3gl3        | SH3-domain GRB2-like 3                                              | -1.31031 | 0.008602 |
| 320782    | Tmem154       | transmembrane protein 154                                           | 0.656866 | 0.008608 |
| 214048    | Larp1b        | La ribonucleoprotein domain family, member 1B                       | -1.35115 | 0.008609 |
| 68097     | Dynl12        | dynein light chain LC8-type 2                                       | -0.65883 | 0.008625 |
| 170743    | Tlr7          | toll-like receptor 7                                                | -2.44124 | 0.008625 |
| 114229    | Kiss1r        | KISS1 receptor                                                      | 1.41537  | 0.008626 |
| 69572     | Mfsd3         | major facilitator superfamily domain containing 3                   | -0.88775 | 0.008636 |
| 319317    | Snhg11        | small nucleolar RNA host gene 11                                    | -2.03786 | 0.00864  |
| 241556    | Tspan18       | tetraspanin 18                                                      | 2.265168 | 0.008642 |
| 16764     | Aff3          | AF4/FMR2 family, member 3                                           | -1.63231 | 0.008721 |
| 14735     | Gpc4          | glypican 4                                                          | -0.90122 | 0.008739 |
| 15116     | Has1          | hyaluronan synthase 1                                               | -2.14922 | 0.008739 |
| 70625     | Med26         | mediator complex subunit 26                                         | 0.863602 | 0.008739 |
| 214779    | Zfp879        | zinc finger protein 879                                             | 1.770728 | 0.008739 |
| 269513    | Nkain3        | Na+/K+ transporting ATPase interacting 3                            | 1.769117 | 0.008743 |
| 66671     | Ccnh          | cyclin H                                                            | -0.84794 | 0.008748 |
| 59029     | Psmid14       | proteasome (prosome, macropain) 26S subunit, non-ATPase, 14         | -0.70732 | 0.008748 |
| 217258    | Abca8a        | ATP-binding cassette, sub-family A (ABC1), member 8a                | 2.141127 | 0.008763 |
| 71198     | Otud1         | OTU domain containing 1                                             | -1.01046 | 0.008767 |
| 68597     | Ccdc167       | coiled-coil domain containing 167                                   | 1.170463 | 0.008767 |
| 52637     | Cisd1         | CDGSH iron sulfur domain 1                                          | -0.67252 | 0.00882  |
| 71828     | Gtf2a1l       | general transcription factor IIA, 1-like                            | 5.036544 | 0.00882  |
| 11596     | Ager          | advanced glycosylation end product-specific receptor                | 1.277155 | 0.008834 |
| 18457     | Bloc1s6       | biogenesis of lysosomal organelles complex-1, subunit 6, pallidin   | -0.65137 | 0.008843 |
| 80797     | Cica3a2       | chloride channel accessory 3A2                                      | -5.68594 | 0.008862 |
| 17105     | Ly2           | lysozyme 2                                                          | -3.68188 | 0.008876 |
| 12962     | Crybb3        | crystallin, beta B3                                                 | 2.513317 | 0.008886 |
| 105833    | Ccdc65        | coiled-coil domain containing 65                                    | -1.22714 | 0.00894  |
| 12228     | Btg3          | BTG anti-proliferation factor 3                                     | 0.747206 | 0.008962 |
| 100313945 | Gm14866       | predicted gene 14866                                                | 3.652294 | 0.008962 |
| 74596     | Cds1          | CDP-diacylglycerol synthase 1                                       | -2.42281 | 0.008964 |
| 193385    | Ripor2        | RHO family interacting cell polarization regulator 2                | -1.88293 | 0.00899  |
| 280668    | Adam1a        | a disintegrin and metallopeptidase domain 1a                        | 1.831165 | 0.009028 |
| 12508     | Cd53          | CDS3 antigen                                                        | -2.34502 | 0.009083 |
| 93684     | Selenof       | selenoprotein F                                                     | -1.18456 | 0.009111 |
| 330627    | Trim66        | tripartite motif-containing 66                                      | 1.821057 | 0.009181 |



|           |               |                                                                   |          |          |
|-----------|---------------|-------------------------------------------------------------------|----------|----------|
| 65964     | Map3k20       | mitogen-activated protein kinase kinase kinase 20                 | -0.65828 | 0.0092   |
| 12505     | Cd44          | CD44 antigen                                                      | -1.50994 | 0.009298 |
| 17005     | Ltk           | leukocyte tyrosine kinase                                         | 2.390097 | 0.009298 |
| 105242443 | Gm38708       | predicted gene, 38708                                             | -1.98351 | 0.009298 |
| 11499     | Adam5         | a disintegrin and metallopeptidase domain 5                       | -1.52527 | 0.009329 |
| 667171    | Gm8493        | predicted gene 8493                                               | 1.687883 | 0.009355 |
| 52708     | Zfp410        | zinc finger protein 410                                           | 0.735674 | 0.009378 |
| 18671     | Abcb1a        | ATP-binding cassette, sub-family B (MDR/TAP), member 1A           | -2.38193 | 0.009387 |
| 12491     | Cd36          | CD36 molecule                                                     | -3.81046 | 0.009387 |
| 67171     | Dram2         | DNA-damage regulated autophagy modulator 2                        | -0.76043 | 0.009387 |
| 667281    | H60b          | histocompatibility 60b                                            | -3.12658 | 0.009389 |
| 232440    | H2aj          | H2I.A histone                                                     | -0.75345 | 0.009431 |
| 214133    | Tet2          | tet methylcytosine dioxygenase 2                                  | 0.993837 | 0.009472 |
| 380686    | Cnrip1        | cannabinoid receptor interacting protein 1                        | -0.9283  | 0.009472 |
| 68774     | Ms4a6d        | membrane-spanning 4-domains, subfamily A, member 6D               | -3.09784 | 0.009472 |
| 17384     | Mmp10         | matrix metallopeptidase 10                                        | 2.1196   | 0.00953  |
| 242509    | Bnc2          | basonuclin 2                                                      | 0.851519 | 0.00959  |
| 20220     | Sap18         | Sin3-associated polypeptide 18                                    | -0.77388 | 0.009601 |
| 102639339 | Gm26559       | predicted gene, 26559                                             | -2.19471 | 0.009618 |
| 627214    | Insyn2a       | inhibitory synaptic factor 2A                                     | -2.58437 | 0.009651 |
| 75812     | Tasp1         | taspace, threonine aspartase 1                                    | -0.85096 | 0.009669 |
| 171282    | Acot4         | acyl-CoA thioesterase 4                                           | 1.838218 | 0.009676 |
| 625901    | Gm6634        | predicted gene 6634                                               | -1.40126 | 0.009705 |
| 666237    | Gm7997        | lactate dehydrogenase A pseudogene                                | 1.950512 | 0.009705 |
| 66175     | Mustn1        | musculoskeletal, embryonic nuclear protein 1                      | -2.2383  | 0.009705 |
| 57247     | Zfp276        | zinc finger protein (C2H2 type) 276                               | 0.893329 | 0.009705 |
| 102644    | Oaf           | out at first homolog                                              | -1.49404 | 0.009708 |
| 18783     | Pla2g4a       | phospholipase A2, group IVA (cytosolic, calcium-dependent)        | -1.22467 | 0.009718 |
| 11927     | Atox1         | antioxidant 1 copper chaperone                                    | -0.98437 | 0.009719 |
| 29858     | Pmm1          | phosphomannomutase 1                                              | -0.69278 | 0.009729 |
| 108058    | Camk2d        | calcium/calmodulin-dependent protein kinase II, delta             | -0.60218 | 0.009739 |
| 13607     | Eda           | ectodysplasin-A                                                   | -1.05608 | 0.009739 |
| 24045     | Scamp3        | secretory carrier membrane protein 3                              | -0.64458 | 0.009739 |
| 100043489 | 1300002E11Rik | RIKEN cDNA 1300002E11 gene                                        | 0.984836 | 0.009794 |
| 433408    | Gm13375       | predicted gene 13375                                              | -1.07414 | 0.009795 |
| 71639     | 4930430E12Rik | RIKEN cDNA 4930430E12 gene                                        | -3.66261 | 0.009815 |
| 236727    | Slc9a7        | solute carrier family 9 (sodium/hydrogen exchanger), member 7     | -2.60899 | 0.009815 |
| 107522    | Ece2          | endothelin converting enzyme 2                                    | -1.88713 | 0.009817 |
| 50709     | H1f4          | H1.4 linker histone, cluster member                               | -2.06488 | 0.00983  |
| 224794    | Enpp4         | ectonucleotide pyrophosphatase/phosphodiesterase 4                | 1.019105 | 0.009854 |
| 17474     | Clec4d        | C-type lectin domain family 4, member d                           | -4.01697 | 0.009891 |
| 243780    | Dennd11       | DENN domain containing 11                                         | 1.105255 | 0.009898 |
| 16404     | Itga7         | integrin alpha 7                                                  | -2.1847  | 0.009923 |
| 26457     | Slc27a1       | solute carrier family 27 (fatty acid transporter), member 1       | 0.757481 | 0.009923 |
| 236794    | Slc9a6        | solute carrier family 9 (sodium/hydrogen exchanger), member 6     | -0.88898 | 0.009923 |
| 71797     | Chst13        | carbohydrate sulfotransferase 13                                  | -5.07217 | 0.009943 |
| 71566     | Clmp          | CXADR-like membrane protein                                       | 0.773209 | 0.009943 |
| 77836     | Mlana         | melan-A                                                           | -2.84259 | 0.009943 |
| 503610    | Zdhhc18       | zinc finger, DHHC domain containing 18                            | -0.79228 | 0.009943 |
| 74120     | Zfp263        | zinc finger protein 263                                           | 0.685892 | 0.009943 |
| 69721     | Nkiras1       | NFKB inhibitor interacting Ras-like protein 1                     | -0.96147 | 0.009984 |
| 20194     | S100a10       | S100 calcium binding protein A10 (calpactin)                      | -1.01304 | 0.009993 |
| 77996     | Cutal         | cutA divalent cation tolerance homolog-like                       | -4.72691 | 0.009994 |
| 264134    | Ttc26         | tetratricopeptide repeat domain 26                                | -0.69538 | 0.010015 |
| 223672    | Apol9a        | apolipoprotein L 9a                                               | -2.21362 | 0.010016 |
| 66625     | Pnir          | PNN interacting serine/arginine-rich                              | 0.90828  | 0.010021 |
| 170826    | Ppargc1b      | peroxisome proliferative activated receptor, gamma, coactivator   | 1.484113 | 0.010021 |
| 107321    | Lpxn          | leupaxin                                                          | -2.22641 | 0.010045 |
| 56273     | Pex14         | peroxisomal biogenesis factor 14                                  | -0.92191 | 0.010045 |
| 224585    | Zfp160        | zinc finger protein 160                                           | 0.675706 | 0.010078 |
| 27226     | Pla2g7        | phospholipase A2, group VII (platelet-activating factor acetylhyd | -4.71417 | 0.010088 |
| 11658     | Alcam         | activated leukocyte cell adhesion molecule                        | -2.40972 | 0.010119 |
| 93876     | Pcdhb5        | protocadherin beta 5                                              | 0.873652 | 0.010119 |
| 66390     | Prelid3b      | PRELI domain containing 3B                                        | -0.66823 | 0.010119 |
| 70503     | Ddo           | D-aspartate oxidase                                               | -3.82284 | 0.010197 |
| 407819    | BC031181      | cDNA sequence BC031181                                            | -1.00861 | 0.010198 |
| 56421     | Pfkp          | phosphofructokinase, platelet                                     | -0.9849  | 0.010198 |
| 16009     | Igfbp3        | insulin-like growth factor binding protein 3                      | -1.84285 | 0.010234 |
| 326623    | Tnfsf15       | tumor necrosis factor (ligand) superfamily, member 15             | -4.10778 | 0.010244 |
| 57296     | Psm8          | proteasome (prosome, macropain) 26S subunit, non-ATPase, 8        | -0.917   | 0.010265 |
| 66154     | Tmem14c       | transmembrane protein 14C                                         | -0.74546 | 0.010265 |
| 65116     | Prrg2         | proline-rich Gla (G-carboxylglutamic acid) polypeptide 2          | -1.1684  | 0.010274 |
| 74012     | Rap2b         | RAP2B, member of RAS oncogene family                              | -0.74622 | 0.010274 |
| 18040     | Nefm          | neurofilament, medium polypeptide                                 | 3.201929 | 0.010345 |
| 71398     | Tasl          | TLR adaptor interacting with endolysosomal SLC15A4                | -4.15917 | 0.010345 |



|           |               |                                                                                                |          |          |
|-----------|---------------|------------------------------------------------------------------------------------------------|----------|----------|
| 330908    | Opcml         | opioid binding protein/cell adhesion molecule-like                                             | 2.675321 | 0.010365 |
| 108672    | Zdhhc15       | zinc finger, DHHC domain containing 15                                                         | -2.25195 | 0.010392 |
| 17133     | Maff          | v-maf musculoaponeurotic fibrosarcoma oncogene family, protein 1                               | -0.89358 | 0.010437 |
| 22751     | Zfp90         | zinc finger protein 90                                                                         | 0.954833 | 0.010444 |
| 230075    | Ndufb6        | NADH:ubiquinone oxidoreductase subunit B6                                                      | -0.64249 | 0.010447 |
| 54384     | Mtmr7         | myotubularin related protein 7                                                                 | 1.917026 | 0.010454 |
| 20650     | Sntb2         | syntrophin, basic 2                                                                            | 1.220505 | 0.010498 |
| 216820    | Dhrs7b        | dehydrogenase/reductase (SDR family) member 7B                                                 | -0.76137 | 0.010596 |
| 72552     | Hsd11         | hydroxysteroid dehydrogenase like 1                                                            | 0.867542 | 0.010596 |
| 245350    | AA414768      | expressed sequence AA414768                                                                    | -1.48079 | 0.010618 |
| 21955     | Tnnt1         | troponin T1, skeletal, slow                                                                    | -2.89055 | 0.010737 |
| 18391     | Sigmar1       | sigma non-opioid intracellular receptor 1                                                      | -0.68519 | 0.010777 |
| 12549     | Arhgap31      | Rho GTPase activating protein 31                                                               | 1.136901 | 0.010797 |
| 58991     | Ghrl          | ghrelin                                                                                        | 2.357632 | 0.010801 |
| 21981     | Ppp1r13b      | protein phosphatase 1, regulatory subunit 13B                                                  | 1.181424 | 0.010802 |
| 22414     | Wnt2b         | wingless-type MMTV integration site family, member 2B                                          | -1.46991 | 0.010836 |
| 58242     | Nudt11        | nudix (nucleoside diphosphate linked moiety X)-type motif 11                                   | -4.99686 | 0.010877 |
| 16589     | Uhmk1         | U2AF homology motif (UHM) kinase 1                                                             | -0.72249 | 0.010888 |
| 209086    | Samd9l        | sterile alpha motif domain containing 9-like                                                   | -0.61218 | 0.010893 |
| 100503043 | Armxc4        | armadillo repeat containing, X-linked 4                                                        | -1.69844 | 0.010899 |
| 12267     | C3ar1         | complement component 3a receptor 1                                                             | -2.60139 | 0.010899 |
| 12260     | C1qb          | complement component 1, q subcomponent, beta polypeptide                                       | -4.12528 | 0.010934 |
| 78771     | Mctp1         | multiple C2 domains, transmembrane 1                                                           | -2.72401 | 0.010942 |
| 332579    | Card9         | caspase recruitment domain family, member 9                                                    | -2.28994 | 0.010961 |
| 73738     | Haus7         | HAUS augmin-like complex, subunit 7                                                            | -1.09653 | 0.011008 |
| 20361     | Sema7a        | sema domain, immunoglobulin domain (Ig), and GPI membrane anchor                               | -1.74427 | 0.011008 |
| 234699    | Edc4          | enhancer of mRNA decapping 4                                                                   | 0.644106 | 0.011011 |
| 17882     | Myh2          | myosin, heavy polypeptide 2, skeletal muscle, adult                                            | -6.17275 | 0.011017 |
| 20454     | St3gal5       | ST3 beta-galactoside alpha-2,3-sialyltransferase 5                                             | -0.73196 | 0.011024 |
| 20848     | Stat3         | signal transducer and activator of transcription 3                                             | 0.679334 | 0.011054 |
| 235134    | Nfrkb         | nuclear factor related to kappa B binding protein                                              | 0.823292 | 0.011079 |
| 624223    | Gm13688       | predicted gene 13688                                                                           | -2.37525 | 0.011107 |
| 76454     | Fbxo31        | F-box protein 31                                                                               | 0.760683 | 0.011141 |
| 117591    | Slc2a9        | solute carrier family 2 (facilitated glucose transporter), member 9                            | -1.03186 | 0.011169 |
| 434179    | Zfp975        | zinc finger protein 975                                                                        | 0.801195 | 0.011213 |
| 22213     | Ube2g2        | ubiquitin-conjugating enzyme E2G 2                                                             | -0.77584 | 0.011124 |
| 20200     | S100a6        | S100 calcium binding protein A6 (calcyclin)                                                    | -1.06328 | 0.011427 |
| 107371    | Exoc6         | exocyst complex component 6                                                                    | 0.973557 | 0.011434 |
| 70237     | Bhlhb9        | basic helix-loop-helix domain containing, class B9                                             | 0.973723 | 0.011439 |
| 72108     | Ddhd2         | DDHD domain containing 2                                                                       | 0.606143 | 0.011455 |
| 109624    | Cald1         | caldesmon 1                                                                                    | -1.07451 | 0.011482 |
| 30878     | Apln          | apelin                                                                                         | 1.792593 | 0.011544 |
| 66881     | Pcyox1        | prenylcysteine oxidase 1                                                                       | -0.62913 | 0.011551 |
| 18795     | Plcb1         | phospholipase C, beta 1                                                                        | 0.964195 | 0.011583 |
| 20520     | Slc22a5       | solute carrier family 22 (organic cation transporter), member 5                                | 1.009588 | 0.011605 |
| 213469    | Lgi3          | leucine-rich repeat LGI family, member 3                                                       | -2.24777 | 0.011668 |
| 66834     | Acot13        | acyl-CoA thioesterase 13                                                                       | -0.8188  | 0.011682 |
| 17084     | Ly86          | lymphocyte antigen 86                                                                          | -3.66392 | 0.011721 |
| 16534     | Kcnn4         | potassium intermediate/small conductance calcium-activated channel subunit 4                   | -2.38551 | 0.011822 |
| 328830    | A530064D06Rik | RIKEN cDNA A530064D06 gene                                                                     | -5.4373  | 0.011831 |
| 12554     | Cdh13         | cadherin 13                                                                                    | -2.42853 | 0.011848 |
| 218121    | Mboat1        | membrane bound O-acyltransferase domain containing 1                                           | 1.651477 | 0.011904 |
| 67856     | Echdc3        | enoyl Coenzyme A hydratase domain containing 3                                                 | 0.713891 | 0.012152 |
| 50766     | Crim1         | cysteine rich transmembrane BMP regulator 1 (chordin like)                                     | -0.87841 | 0.012184 |
| 69274     | Ctdspl        | CTD (carboxy-terminal domain, RNA polymerase II, polypeptide A)                                | 0.66027  | 0.012199 |
| 22289     | Kdm6a         | lysine (K)-specific demethylase 6A                                                             | 0.794228 | 0.012206 |
| 105244290 | Gm39929       | predicted gene, 39929                                                                          | 2.20804  | 0.012212 |
| 216725    | Adamts2       | a disintegrin-like and metalloproteinase (reprolysin type) with thrombospondin type 1 motifs 2 | -1.1536  | 0.012218 |
| 235323    | Usp28         | ubiquitin specific peptidase 28                                                                | 0.834884 | 0.012218 |
| 54169     | Kat6b         | K(lysine) acetyltransferase 6B                                                                 | 0.829547 | 0.012282 |
| 53320     | Folh1         | folate hydrolase 1                                                                             | -4.18233 | 0.012293 |
| 621823    | Psme2b        | protease (prosome, macropain) activator subunit 2B                                             | -1.7999  | 0.012293 |
| 69441     | Efcab15       | EF-hand calcium binding domain 15                                                              | 1.523159 | 0.012298 |
| 16997     | Ltbp2         | latent transforming growth factor beta binding protein 2                                       | -0.884   | 0.012316 |
| 56193     | Plek          | pleckstrin                                                                                     | -2.35607 | 0.012316 |
| 15228     | Foxg1         | forkhead box G1                                                                                | -3.73337 | 0.012317 |
| 15497     | Hsd3b6        | hydroxy-delta-5-steroid dehydrogenase, 3 beta- and steroid delta-5 isomerase 6                 | -6.03448 | 0.012317 |
| 321000    | Lrif1         | ligand dependent nuclear receptor interacting factor 1                                         | -0.60495 | 0.012317 |
| 100126034 | Gm10644       | predicted gene 10644                                                                           | 3.312161 | 0.012318 |
| 75210     | Prr3          | proline-rich polypeptide 3                                                                     | 0.61064  | 0.012323 |
| 76967     | 2700049A03Rik | RIKEN cDNA 2700049A03 gene                                                                     | 0.782292 | 0.012331 |
| 73729     | Zfp383        | zinc finger protein 383                                                                        | 0.786124 | 0.012356 |
| 12176     | Snip3         | BCL2/adenovirus E1B interacting protein 3                                                      | -1.6274  | 0.012369 |
| 234594    | Cnot1         | CCR4-NOT transcription complex, subunit 1                                                      | 0.92464  | 0.012372 |
| 17314     | Mgmt          | O-6-methylguanine-DNA methyltransferase                                                        | -1.32634 | 0.012372 |

|           |               |                                                                  |          |          |
|-----------|---------------|------------------------------------------------------------------|----------|----------|
| 98733     | Obsl1         | obscurin-like 1                                                  | 0.796946 | 0.012372 |
| 76612     | Lrrc27        | leucine rich repeat containing 27                                | -1.4401  | 0.012386 |
| 216871    | Gltpd2        | glycolipid transfer protein domain containing 2                  | -5.09541 | 0.012398 |
| 94040     | Cimn          | calmin                                                           | 1.11604  | 0.012423 |
| 76497     | Ppp1r11       | protein phosphatase 1, regulatory inhibitor subunit 11           | -0.62672 | 0.012423 |
| 235505    | Cd109         | CD109 antigen                                                    | -1.97741 | 0.012466 |
| 14867     | Gstm6         | glutathione S-transferase, mu 6                                  | -2.87274 | 0.012509 |
| 26383     | Fto           | fat mass and obesity associated                                  | 0.626401 | 0.012516 |
| 269233    | Fam171a1      | family with sequence similarity 171, member A1                   | -1.03691 | 0.012558 |
| 13522     | Adam28        | a disintegrin and metallopeptidase domain 28                     | 3.61773  | 0.012583 |
| 14802     | Gria4         | glutamate receptor, ionotropic, AMPA4 (alpha 4)                  | -1.79247 | 0.012583 |
| 66147     | Necap2        | NECAP endocytosis associated 2                                   | -0.80041 | 0.012585 |
| 12237     | Bub3          | BUB3 mitotic checkpoint protein                                  | -0.70868 | 0.0126   |
| 11891     | Rab27a        | RAB27A, member RAS oncogene family                               | 1.153024 | 0.01261  |
| 12273     | CSar1         | complement component 5a receptor 1                               | -2.76376 | 0.012685 |
| 231600    | Chfr          | checkpoint with forkhead and ring finger domains                 | -0.7075  | 0.012685 |
| 74175     | Crct1         | cysteine-rich C-terminal 1                                       | 1.363065 | 0.012685 |
| 100503924 | Fcor          | Foxo1 corepressor                                                | 0.951655 | 0.012685 |
| 70153     | 2210016F16Rik | RIKEN cDNA 2210016F16 gene                                       | -0.9015  | 0.012781 |
| 12495     | Entpd1        | ectonucleoside triphosphate diphosphohydrolase 1                 | -2.53752 | 0.012781 |
| 98952     | Fam102a       | family with sequence similarity 102, member A                    | 0.781435 | 0.012782 |
| 100503482 | Gm649         | melanoma antigen family A pseudogene                             | -4.67476 | 0.012794 |
| 13642     | Efnb2         | ephrin B2                                                        | 0.651281 | 0.012865 |
| 66329     | Susd3         | sushi domain containing 3                                        | -3.62997 | 0.012872 |
| 100043424 | Morrbid       | myeloid RNA regulator of BCL2L11 induced cell death              | -0.77342 | 0.012895 |
| 12517     | Cd72          | CD72 antigen                                                     | -2.58797 | 0.012912 |
| 18194     | Nsdhl         | NAD(P) dependent steroid dehydrogenase-like                      | -0.80779 | 0.01296  |
| 216858    | Kctd11        | potassium channel tetramerisation domain containing 11           | -0.63145 | 0.013013 |
| 108735    | Sft2d2        | SFT2 domain containing 2                                         | 0.621335 | 0.013026 |
| 240041    | Zfp945        | zinc finger protein 945                                          | 1.007258 | 0.013029 |
| 18294     | Ogg1          | 8-oxoguanine DNA-glycosylase 1                                   | -0.68221 | 0.013061 |
| 74008     | Argg          | arylsulfatase G                                                  | -1.49949 | 0.013062 |
| 100502698 | Rubcn         | RUN domain and cysteine-rich domain containing, Beclin 1-intera  | 0.603795 | 0.013142 |
| 12040     | Bckdhhb       | branched chain ketoacid dehydrogenase E1, beta polypeptide       | 0.725441 | 0.013162 |
| 99899     | Ifi44         | interferon-induced protein 44                                    | -3.23392 | 0.01318  |
| 18584     | Pde8a         | phosphodiesterase 8A                                             | -1.56053 | 0.013213 |
| 319781    | 9530051G07Rik | RIKEN cDNA 9530051G07 gene                                       | -2.73148 | 0.01324  |
| 56405     | Dusp14        | dual specificity phosphatase 14                                  | -1.30152 | 0.01324  |
| 22779     | Ikzf2         | IKAROS family zinc finger 2                                      | 1.12943  | 0.013241 |
| 69123     | Eci3          | enoyl-Coenzyme A delta isomerase 3                               | 2.537387 | 0.013255 |
| 68846     | Rnf208        | ring finger protein 208                                          | -5.0678  | 0.013255 |
| 18725     | Pira2         | paired-Ig-like receptor A2                                       | -3.15466 | 0.013268 |
| 23996     | Psmc4         | proteasome (prosome, macropain) 26S subunit, ATPase, 4           | -0.71217 | 0.013284 |
| 100043387 | Gm14305       | predicted gene 14305                                             | -0.62586 | 0.013288 |
| 231630    | Ficd          | FIC domain containing                                            | -0.94771 | 0.01335  |
| 57896     | Krcc1         | lysine-rich coiled-coil 1                                        | -0.67444 | 0.013364 |
| 14688     | Gnb1          | guanine nucleotide binding protein (G protein), beta 1           | -0.65258 | 0.013364 |
| 223775    | Pim3          | proviral integration site 3                                      | 0.683494 | 0.01337  |
| 18611     | Pea15a        | phosphoprotein enriched in astrocytes 15A                        | -0.72625 | 0.013418 |
| 19302     | Pex2          | peroxisomal biogenesis factor 2                                  | -0.73702 | 0.013423 |
| 21854     | Timm17a       | translocase of inner mitochondrial membrane 17a                  | -0.6415  | 0.013486 |
| 319991    | Kif6          | kinesin family member 6                                          | 1.162738 | 0.01351  |
| 20296     | Ccl2          | chemokine (C-C motif) ligand 2                                   | -1.52491 | 0.013525 |
| 212996    | Galnt17       | polypeptide N-acetylgalactosaminyltransferase 17                 | -1.08177 | 0.013525 |
| 100036535 | Gm9913        | predicted gene 9913                                              | -2.0128  | 0.013525 |
| 13043     | Ctnn          | cortactin                                                        | -0.64588 | 0.013544 |
| 13033     | Ctsd          | cathepsin D                                                      | -1.50784 | 0.013578 |
| 22139     | Ttr           | transthyretin                                                    | 4.887353 | 0.013595 |
| 70415     | Stk26         | serine/threonine kinase 26                                       | 2.153289 | 0.013596 |
| 66074     | Tmem167       | transmembrane protein 167                                        | -0.70979 | 0.013626 |
| 69922     | Vrk2          | vaccinia related kinase 2                                        | -0.78983 | 0.013669 |
| 210622    | Pamr1         | peptidase domain containing associated with muscle regeneratio   | -0.91529 | 0.013678 |
| 13180     | Pcbd1         | pterin 4 alpha carbinolamine dehydratase/dimerization cofactor   | -2.8288  | 0.013678 |
| 328977    | Zfp532        | zinc finger protein 532                                          | 0.756091 | 0.013678 |
| 22688     | Zfp26         | zinc finger protein 26                                           | 0.9253   | 0.013706 |
| 22413     | Wnt2          | wingless-type MMTV integration site family, member 2             | -4.43603 | 0.013735 |
| 22351     | Vill          | villin-like                                                      | 1.409965 | 0.013743 |
| 14661     | Glud1         | glutamate dehydrogenase 1                                        | 0.815782 | 0.013786 |
| 27472     | Slc16a10      | solute carrier family 16 (monocarboxylic acid transporters), mem | 0.680374 | 0.013786 |
| 23827     | Bpnt1         | 3'(2'), 5'-bisphosphate nucleotidase 1                           | -0.6035  | 0.013823 |
| 56749     | Dhodh         | dihydroorotate dehydrogenase                                     | 0.732153 | 0.013823 |
| 72167     | Thumpd2       | THUMP domain containing 2                                        | 0.777709 | 0.013823 |
| 20197     | S100a3        | S100 calcium binding protein A3                                  | -2.01952 | 0.013862 |
| 69534     | Avp1          | arginine vasopressin-induced 1                                   | -0.7767  | 0.013934 |
| 50781     | Dkk3          | dickkopf WNT signaling pathway inhibitor 3                       | -2.46629 | 0.013934 |

|           |               |                                                                        |          |          |
|-----------|---------------|------------------------------------------------------------------------|----------|----------|
| 100043899 | R3hdm1        | R3H domain containing-like                                             | 2.257405 | 0.013934 |
| 66384     | Srp19         | signal recognition particle 19                                         | -0.74249 | 0.013943 |
| 216350    | Tspan8        | tetraspanin 8                                                          | 2.771604 | 0.013957 |
| 19200     | Pstpip1       | proline-serine-threonine phosphatase-interacting protein 1             | 1.31196  | 0.013958 |
| 107765    | Ankrd1        | ankyrin repeat domain 1 (cardiac muscle)                               | -2.11251 | 0.013966 |
| 12390     | Cav2          | caveolin 2                                                             | -0.72728 | 0.013968 |
| 80837     | Rhoj          | ras homolog family member J                                            | -0.86998 | 0.013968 |
| 13853     | Epm2a         | epilepsy, progressive myoclonic epilepsy, type 2 gene alpha            | -1.90401 | 0.013969 |
| 58998     | Nectin3       | nectin cell adhesion molecule 3                                        | -0.80822 | 0.014016 |
| 66169     | Tomm7         | translocase of outer mitochondrial membrane 7                          | -1.03055 | 0.014136 |
| 104625    | Cnot6         | CCR4-NOT transcription complex, subunit 6                              | 0.711398 | 0.014191 |
| 66065     | Hsd17b14      | hydroxysteroid (17-beta) dehydrogenase 14                              | 2.633203 | 0.014191 |
| 20307     | Ccl8          | chemokine (C-C motif) ligand 8                                         | -4.13596 | 0.0142   |
| 102632669 | Gm16206       | predicted gene 16206                                                   | 2.200383 | 0.01426  |
| 100043771 | Gm10651       | predicted pseudogene 10651                                             | 3.871238 | 0.014262 |
| 12527     | Cd9           | CD9 antigen                                                            | -1.56385 | 0.014286 |
| 12182     | Bst1          | bone marrow stromal cell antigen 1                                     | -3.03422 | 0.014292 |
| 54373     | Prss16        | protease, serine 16 (thymus)                                           | 1.399957 | 0.014311 |
| 80901     | Cxcr6         | chemokine (C-X-C motif) receptor 6                                     | 2.795035 | 0.014376 |
| 320253    | Marchf3       | membrane associated ring-CH-type finger 3                              | -0.8978  | 0.01439  |
| 67472     | Mtfr1         | mitochondrial fission regulator 1                                      | -0.60585 | 0.014593 |
| 78455     | Helz          | helicase with zinc finger domain                                       | 0.840644 | 0.014609 |
| 12540     | Cdc42         | cell division cycle 42                                                 | -0.64919 | 0.01463  |
| 70737     | Cgn           | cingulin                                                               | 1.449668 | 0.01466  |
| 94109     | Csmd1         | CUB and Sushi multiple domains 1                                       | -3.85362 | 0.01466  |
| 72669     | 2810032G03Rik | RIKEN cDNA 2810032G03 gene                                             | -1.58985 | 0.014703 |
| 320923    | Map7d3        | MAP7 domain containing 3                                               | -2.34344 | 0.014751 |
| 100048534 | Cfap43        | cilia and flagella associated protein 43                               | -0.69161 | 0.014897 |
| 68865     | Arv1          | ARV1 homolog, fatty acid homeostasis modulator                         | 1.083881 | 0.014905 |
| 56644     | Clec7a        | C-type lectin domain family 7, member a                                | -2.80102 | 0.014905 |
| 105439    | Slain1        | SLAIN motif family, member 1                                           | 2.438323 | 0.014905 |
| 232223    | Txnrd3        | thioredoxin reductase 3                                                | 0.761176 | 0.014905 |
| 68119     | Cmtm3         | KLFL-like MARVEL transmembrane domain containing 3                     | 0.949348 | 0.014947 |
| 76432     | 2310001H17Rik | RIKEN cDNA 2310001H17 gene                                             | -1.45297 | 0.014962 |
| 68106     | Nt5c3b        | 5'-nucleotidase, cytosolic IIIB                                        | 0.770499 | 0.014962 |
| 15465     | Hrh1          | histamine receptor H1                                                  | -2.05685 | 0.014978 |
| 11501     | Adam8         | a disintegrin and metallopeptidase domain 8                            | -2.29143 | 0.015012 |
| 433790    | Gm13241       | carnitine deficiency-associated gene expressed in ventricle 3 psei     | 1.927633 | 0.015034 |
| 217864    | Rcor1         | REST corepressor 1                                                     | 0.717254 | 0.015034 |
| 72297     | B3gnt3        | UDP-GlcNAc:betaGal beta-1,3-N-acetylglucosaminyltransferase 3          | -1.65274 | 0.015044 |
| 15529     | Sdc2          | syndecan 2                                                             | -0.85408 | 0.015109 |
| 270106    | Rpl13         | ribosomal protein L13                                                  | 0.648209 | 0.015137 |
| 17132     | Maf           | avian musculoaponeurotic fibrosarcoma oncogene homolog                 | 2.003158 | 0.015167 |
| 17450     | Morc1         | microorchidia 1                                                        | 3.074228 | 0.015167 |
| 73658     | Spns1         | spinster homolog 1                                                     | -0.60112 | 0.015178 |
| 434437    | Amt           | aminomethyltransferase                                                 | 1.126001 | 0.015265 |
| 102638882 | Gm35339       | predicted gene, 35339                                                  | 1.195704 | 0.015288 |
| 216618    | Cfap36        | cilia and flagella associated protein 36                               | -0.68936 | 0.01533  |
| 16420     | Itgb6         | integrin beta 6                                                        | -5.00254 | 0.015383 |
| 209047    | Gipc3         | GIPC PDZ domain containing family, member 3                            | -2.40545 | 0.015385 |
| 19876     | Robo1         | roundabout guidance receptor 1                                         | -1.89325 | 0.015409 |
| 54366     | Ctnnal1       | catenin (cadherin associated protein), alpha-like 1                    | 1.611442 | 0.015435 |
| 432555    | Gm5431        | predicted gene 5431                                                    | -3.03192 | 0.015438 |
| 106522    | Pkdcc         | protein kinase domain containing, cytoplasmic                          | 1.049775 | 0.015438 |
| 70804     | Pgrmc2        | progesterone receptor membrane component 2                             | -1.2443  | 0.015455 |
| 101056094 | Gm21811       | predicted gene, 21811                                                  | 0.776867 | 0.015456 |
| 18830     | Pltp          | phospholipid transfer protein                                          | -0.79891 | 0.015486 |
| 52864     | Slx4          | SLX4 structure-specific endonuclease subunit homolog (S. cerevisiae)   | 0.792959 | 0.015525 |
| 19727     | Rfxank        | regulatory factor X-associated ankyrin-containing protein              | 0.639087 | 0.015542 |
| 66493     | Mrpl51        | mitochondrial ribosomal protein L51                                    | -0.66035 | 0.015628 |
| 100504632 | Gm11478       | predicted gene 11478                                                   | 1.088329 | 0.015643 |
| 330427    | 9330102E08Rik | RIKEN cDNA 9330102E08 gene                                             | -1.24992 | 0.015825 |
| 244416    | Ppp1r3b       | protein phosphatase 1, regulatory subunit 3B                           | -1.21291 | 0.015883 |
| 67861     | Akr1b10       | aldo-keto reductase family 1, member B10 (aldose reductase)            | -0.77802 | 0.015907 |
| 207175    | Cetn4         | centrin 4                                                              | -1.85821 | 0.015907 |
| 252967    | Ropn1l        | ropporin 1-like                                                        | -1.13295 | 0.015948 |
| 320265    | Tafa1         | TAFA chemokine like family member 1                                    | -4.99627 | 0.01598  |
| 53857     | Tuba8         | tubulin, alpha 8                                                       | -2.85745 | 0.015982 |
| 329480    | Wt1os         | Wilms tumor 1 homolog, opposite strand                                 | 3.061951 | 0.016053 |
| 11981     | Atp9a         | ATPase, class II, type 9A                                              | -1.45239 | 0.016117 |
| 216867    | Slc16a11      | solute carrier family 16 (monocarboxylic acid transporters), member 11 | 1.58912  | 0.01612  |
| 407243    | Tmem189       | transmembrane protein 189                                              | -0.8387  | 0.016165 |
| 231668    | Vsig10        | V-set and immunoglobulin domain containing 10                          | 0.641821 | 0.016178 |
| 68366     | Tmem129       | transmembrane protein 129                                              | -0.63431 | 0.016227 |
| 16835     | Ldlr          | low density lipoprotein receptor                                       | -0.68815 | 0.016239 |

|           |           |                                                                 |          |          |
|-----------|-----------|-----------------------------------------------------------------|----------|----------|
| 230857    | Ece1      | endothelin converting enzyme 1                                  | -1.12917 | 0.016252 |
| 11606     | Agt       | angiotensinogen (serpin peptidase inhibitor, clade A, member 8) | -3.06011 | 0.016261 |
| 69029     | Smdt1     | single-pass membrane protein with aspartate rich tail 1         | -0.84451 | 0.016261 |
| 668108    | Gvin-ps3  | GTPase, very large interferon inducible, pseudogene 3           | 2.14763  | 0.01627  |
| 54711     | Plagl2    | pleiomorphic adenoma gene-like 2                                | 0.816411 | 0.016318 |
| 14086     | Fscn1     | fascin actin-bundling protein 1                                 | 1.050722 | 0.016359 |
| 66690     | Tmem186   | transmembrane protein 186                                       | 0.69438  | 0.016381 |
| 13867     | ErbB3     | erb-b2 receptor tyrosine kinase 3                               | 1.684256 | 0.0164   |
| 71946     | Endod1    | endonuclease domain containing 1                                | -1.07399 | 0.016446 |
| 68991     | Ssu72     | Ssu72 RNA polymerase II CTD phosphatase homolog (yeast)         | -0.77562 | 0.016453 |
| 70088     | Meaf6     | MYST/Esa1-associated factor 6                                   | 0.758113 | 0.016545 |
| 22025     | Nr2c1     | nuclear receptor subfamily 2, group C, member 1                 | 0.766538 | 0.016545 |
| 791300    | Gm9752    | predicted gene 9752                                             | 1.501898 | 0.016546 |
| 17390     | Mmp2      | matrix metalloproteinase 2                                      | -1.56908 | 0.016573 |
| 64075     | Smoc1     | SPARC related modular calcium binding 1                         | -3.21995 | 0.016634 |
| 12823     | Col19a1   | collagen, type XIX, alpha 1                                     | -2.04976 | 0.016651 |
| 58233     | Dnaj4     | DnaJ heat shock protein family (Hsp40) member A4                | -0.65765 | 0.016674 |
| 666537    | Gm8153    | glyceraldehyde-3-phosphate dehydrogenase pseudogene             | 4.329222 | 0.016674 |
| 66607     | Ms4a4d    | membrane-spanning 4-domains, subfamily A, member 4D             | -1.0917  | 0.016674 |
| 194744    | Slc25a43  | solute carrier family 25, member 43                             | -1.75671 | 0.016674 |
| 26358     | Aldh1a7   | aldehyde dehydrogenase family 1, subfamily A7                   | -1.82088 | 0.016715 |
| 20375     | Spi1      | spleen focus forming virus (SFFV) proviral integration oncogene | -2.77581 | 0.016883 |
| 26611     | Rcn2      | reticulocalbin 2                                                | -0.89411 | 0.017026 |
| 77006     | Ddrgk1    | DDRKG domain containing 1                                       | -0.88723 | 0.01705  |
| 320472    | Ppm1e     | protein phosphatase 1E (PP2C domain containing)                 | -1.41697 | 0.017072 |
| 20557     | Sfn3      | schlafen 3                                                      | 2.677944 | 0.017073 |
| 170755    | Sgk3      | serum/glucocorticoid regulated kinase 3                         | -1.12776 | 0.017113 |
| 26877     | B3galt1   | UDP-Gal:betaGlcNAc beta 1,3-galactosyltransferase, polypeptide  | 1.050827 | 0.017124 |
| 19171     | Psmb10    | proteasome (prosome, macropain) subunit, beta type 10           | 0.67262  | 0.01721  |
| 19141     | Lgmn      | legumain                                                        | -1.45206 | 0.017271 |
| 234684    | Lrrc29    | leucine rich repeat containing 29                               | 1.41542  | 0.017271 |
| 73144     | Mir100hg  | Mir100 Mirlet7a-2 Mir125b-1 cluster host gene                   | 1.329696 | 0.017346 |
| 66388     | Cutc      | cutC copper transporter                                         | 0.838441 | 0.017354 |
| 11857     | Arhgdib   | Rho, GDP dissociation inhibitor (GDI) beta                      | -1.55944 | 0.017355 |
| 74711     | TtlI9     | tubulin tyrosine ligase-like family, member 9                   | -2.72667 | 0.017355 |
| 72607     | Usp13     | ubiquitin specific peptidase 13 (isopeptidase T-3)              | -0.61554 | 0.017355 |
| 80904     | Dtx3      | deltex 3, E3 ubiquitin ligase                                   | 0.792022 | 0.017378 |
| 104836    | Cbl11     | Casitas B-lineage lymphoma-like 1                               | 0.739982 | 0.017393 |
| 241311    | Zbtb34    | zinc finger and BTB domain containing 34                        | 0.790407 | 0.017445 |
| 52838     | Dnlz      | DNL-type zinc finger                                            | -0.65723 | 0.017454 |
| 234725    | Zfp612    | zinc finger protein 612                                         | 0.816345 | 0.017454 |
| 74165     | Fbxl22    | F-box and leucine-rich repeat protein 22                        | -2.02201 | 0.017493 |
| 56378     | Arpc3     | actin related protein 2/3 complex, subunit 3                    | -0.63947 | 0.017496 |
| 225010    | Lclat1    | lysocardiolipin acyltransferase 1                               | -0.68514 | 0.017496 |
| 70727     | Rasgef1a  | RasGEF domain family, member 1A                                 | 1.464548 | 0.017502 |
| 22626     | Slc23a3   | solute carrier family 23 (nucleobase transporters), member 3    | 1.70567  | 0.017503 |
| 170625    | Snx18     | sorting nexin 18                                                | -0.85752 | 0.017532 |
| 16419     | Itgb5     | integrin beta 5                                                 | -0.83675 | 0.017544 |
| 70750     | Kdsr      | 3-ketodihydrosphingosine reductase                              | -0.61821 | 0.017544 |
| 56334     | Tmed2     | transmembrane p24 trafficking protein 2                         | -0.65997 | 0.017544 |
| 100039805 | D5Ert605e | DNA segment, Chr 5, ERATO Doi 605, expressed                    | -2.31166 | 0.017562 |
| 85031     | Pla1a     | phospholipase A1 member A                                       | 1.747848 | 0.017566 |
| 94089     | Trim7     | tripartite motif-containing 7                                   | -0.87904 | 0.01759  |
| 239556    | Cacna1i   | calcium channel, voltage-dependent, alpha 1I subunit            | 2.760106 | 0.017599 |
| 116847    | Prelp     | proline arginine-rich end leucine-rich repeat                   | -1.89057 | 0.017602 |
| 170644    | Ubn1      | ubnuclein 1                                                     | 0.866789 | 0.017658 |
| 545551    | BC021767  | cingulin pseudogene                                             | 2.033086 | 0.017699 |
| 109901    | Cela1     | chymotrypsin-like elastase family, member 1                     | 1.688479 | 0.017764 |
| 17096     | Lyn       | LYN proto-oncogene, Src family tyrosine kinase                  | -0.7027  | 0.017772 |
| 60507     | Qtrt1     | queuine tRNA-ribosyltransferase catalytic subunit 1             | 0.65428  | 0.017786 |
| 60344     | Fign      | fidgetin                                                        | 1.445636 | 0.017789 |
| 242466    | Zfp462    | zinc finger protein 462                                         | 1.089313 | 0.01779  |
| 54614     | Prpf40b   | pre-mRNA processing factor 40B                                  | 0.631337 | 0.017818 |
| 53416     | Stk39     | serine/threonine kinase 39                                      | -1.32574 | 0.017818 |
| 23833     | Cd52      | CD52 antigen                                                    | -3.19827 | 0.017863 |
| 320795    | Pkn1      | protein kinase N1                                               | 0.645516 | 0.017863 |
| 22095     | Tshr      | thyroid stimulating hormone receptor                            | -4.10122 | 0.017897 |
| 21873     | Tjp2      | tight junction protein 2                                        | -1.1001  | 0.017989 |
| 102631843 | Gm30074   | predicted gene, 30074                                           | -2.65132 | 0.018032 |
| 77087     | Ankrd11   | ankyrin repeat domain 11                                        | 0.79117  | 0.018095 |
| 72368     | Borcs8    | BLOC-1 related complex subunit 8                                | 0.778816 | 0.018099 |
| 14827     | Pdia3     | protein disulfide isomerase associated 3                        | -0.84629 | 0.018099 |
| 16582     | Kifc3     | kinesin family member C3                                        | -0.83766 | 0.018162 |
| 56314     | Zfp113    | zinc finger protein 113                                         | 0.714664 | 0.01823  |
| 210503    | Zfp677    | zinc finger protein 677                                         | 0.631688 | 0.018309 |

|           |               |                                                                   |          |          |
|-----------|---------------|-------------------------------------------------------------------|----------|----------|
| 20042     | Rps12         | ribosomal protein S12                                             | 0.727267 | 0.018333 |
| 434325    | Tmem221       | transmembrane protein 221                                         | -1.34098 | 0.018333 |
| 12416     | Cbx2          | chromobox 2                                                       | 1.007675 | 0.018372 |
| 241226    | Itga8         | integrin alpha 8                                                  | -4.39066 | 0.018391 |
| 333654    | Ppp1r13l      | protein phosphatase 1, regulatory subunit 13 like                 | -0.65269 | 0.018391 |
| 12793     | Cnih1         | cornichon family AMPA receptor auxiliary protein 1                | -0.84698 | 0.018426 |
| 13349     | Ackr1         | atypical chemokine receptor 1 (Duffy blood group)                 | 3.107179 | 0.018534 |
| 12831     | Col5a1        | collagen, type V, alpha 1                                         | -0.93663 | 0.01862  |
| 68267     | Slc25a22      | solute carrier family 25 (mitochondrial carrier, glutamate), memt | -0.77133 | 0.018634 |
| 68212     | Tmbim4        | transmembrane BAX inhibitor motif containing 4                    | -0.7514  | 0.018677 |
| 14536     | Nr6a1         | nuclear receptor subfamily 6, group A, member 1                   | 0.95248  | 0.018698 |
| 320879    | B230217O12Rik | RIKEN cDNA B230217O12 gene                                        | -1.16702 | 0.018706 |
| 233912    | Armc5         | armadillo repeat containing 5                                     | -0.60458 | 0.01872  |
| 319164    | H2ac6         | H2A clustered histone 6                                           | -1.41193 | 0.018731 |
| 57890     | Il17re        | interleukin 17 receptor E                                         | -1.38127 | 0.018731 |
| 208884    | Zdhhc9        | zinc finger, DHHC domain containing 9                             | -0.65679 | 0.018731 |
| 100504121 | Med9os        | mediator complex subunit 9, opposite strand                       | -2.34539 | 0.018739 |
| 64602     | Ireb2         | iron responsive element binding protein 2                         | 0.6531   | 0.018833 |
| 232035    | Ccser1        | coiled-coil serine rich 1                                         | 1.45019  | 0.018851 |
| 54637     | Praf2         | PRA1 domain family 2                                              | -0.86837 | 0.018851 |
| 19267     | Ptpre         | protein tyrosine phosphatase, receptor type, E                    | -2.46019 | 0.018851 |
| 387609    | Zhx2          | zinc fingers and homeoboxes 2                                     | 0.60256  | 0.018972 |
| 240725    | Sulf1         | sulfatase 1                                                       | -1.52536 | 0.018999 |
| 252903    | Ap1s3         | adaptor-related protein complex AP-1, sigma 3                     | 1.189061 | 0.019017 |
| 66494     | Prelid1       | PRELI domain containing 1                                         | -0.73298 | 0.01903  |
| 234595    | Slc38a7       | solute carrier family 38, member 7                                | 0.830355 | 0.01903  |
| 80297     | Sptbn4        | spectrin beta, non-erythrocytic 4                                 | -3.25354 | 0.019035 |
| 15234     | Hgf           | hepatocyte growth factor                                          | -2.10555 | 0.019089 |
| 408062    | Zfp873        | zinc finger protein 873                                           | 0.874514 | 0.019089 |
| 100502938 | Gm17491       | predicted gene, 17491                                             | 1.081733 | 0.019165 |
| 230775    | Adgrb2        | adhesion G protein-coupled receptor B2                            | 1.48955  | 0.019292 |
| 70785     | Dennd1c       | DENN/MADD domain containing 1C                                    | -2.99676 | 0.019303 |
| 380836    | Mrs2          | MRS2 magnesium transporter                                        | -0.65217 | 0.01937  |
| 69206     | 2010016118Rik | RIKEN cDNA 2010016118 gene                                        | 2.587821 | 0.019387 |
| 19264     | Ptprc         | protein tyrosine phosphatase, receptor type, C                    | -2.6507  | 0.019573 |
| 378702    | Serf2         | small EDRK-rich factor 2                                          | -1.0996  | 0.019573 |
| 16981     | Lrrn3         | leucine rich repeat protein 3, neuronal                           | -4.27369 | 0.019577 |
| 244059    | Chd2          | chromodomain helicase DNA binding protein 2                       | 0.680272 | 0.019642 |
| 17436     | Me1           | malic enzyme 1, NADP(+)-dependent, cytosolic                      | -0.64976 | 0.019665 |
| 11491     | Adam17        | a disintegrin and metallopeptidase domain 17                      | 0.772976 | 0.019682 |
| 17119     | Mxd1          | MAX dimerization protein 1                                        | 0.679674 | 0.019696 |
| 100503569 | Gm16754       | predicted gene, 16754                                             | 1.161267 | 0.0197   |
| 22671     | Rnf112        | ring finger protein 112                                           | 2.035777 | 0.019721 |
| 208171    | Tmprss7       | transmembrane serine protease 7                                   | -1.77888 | 0.019721 |
| 81877     | Tnxb          | tenascin XB                                                       | -1.3862  | 0.019752 |
| 259300    | Ehd2          | EH-domain containing 2                                            | -0.60151 | 0.019815 |
| 71838     | Phf7          | PHD finger protein 7                                              | -1.0225  | 0.019836 |
| 14783     | Grb10         | growth factor receptor bound protein 10                           | -2.16627 | 0.01985  |
| 66368     | Rtca          | RNA 3'-terminal phosphate cyclase                                 | -0.77118 | 0.019872 |
| 216049    | Zfp365        | zinc finger protein 365                                           | -1.10813 | 0.019915 |
| 17476     | Mpeg1         | macrophage expressed gene 1                                       | -2.40182 | 0.01993  |
| 320172    | E230016M11Rik | RIKEN cDNA E230016M11 gene                                        | 1.451378 | 0.01998  |
| 54403     | Slc4a4        | solute carrier family 4 (anion exchanger), member 4               | -1.37722 | 0.020015 |
| 78284     | Creb3l4       | cAMP responsive element binding protein 3-like 4                  | -1.42768 | 0.020061 |
| 57330     | Gigyf1        | GRB10 interacting GYF protein 1                                   | 0.755515 | 0.020108 |
| 50876     | Tmod2         | tropomodulin 2                                                    | 0.625259 | 0.020108 |
| 68490     | Zfp579        | zinc finger protein 579                                           | 0.93481  | 0.020108 |
| 67367     | Paxbp1        | PAX3 and PAX7 binding protein 1                                   | 0.869692 | 0.020119 |
| 105244739 | Gm15866       | predicted gene 15866                                              | -2.46795 | 0.020127 |
| 623078    | Gm8108        | predicted gene 8108                                               | 4.818684 | 0.020157 |
| 19017     | Ppargc1a      | peroxisome proliferative activated receptor, gamma, coactivator   | 1.903253 | 0.020206 |
| 109754    | Cyb5r3        | cytochrome b5 reductase 3                                         | -0.90153 | 0.020276 |
| 192285    | Phf21a        | PHD finger protein 21A                                            | 0.684905 | 0.020288 |
| 21892     | Tll1          | tolloid-like                                                      | 1.489121 | 0.020289 |
| 83397     | Akap12        | A kinase (PRKA) anchor protein (gravin) 12                        | -1.45648 | 0.020324 |
| 102634692 | Gm32219       | predicted gene, 32219                                             | -3.18851 | 0.020324 |
| 74199     | Vit           | vitrin                                                            | -2.7164  | 0.020376 |
| 77422     | C330018D20Rik | RIKEN cDNA C330018D20 gene                                        | -0.82484 | 0.0204   |
| 628004    | Gm10561       | predicted gene 10561                                              | -1.56867 | 0.0204   |
| 328232    | Gfod1         | glucose-fructose oxidoreductase domain containing 1               | -1.0295  | 0.020404 |
| 234267    | Gpm6a         | glycoprotein m6a                                                  | 1.706803 | 0.020411 |
| 227753    | Gsn           | gelsolin                                                          | -1.01018 | 0.020444 |
| 20775     | Sqle          | squalene epoxidase                                                | -1.3149  | 0.020494 |
| 93874     | Pcdhb3        | protocadherin beta 3                                              | -2.04118 | 0.020541 |
| 218461    | Pde8b         | phosphodiesterase 8B                                              | -1.51477 | 0.020601 |

|           |               |                                                                   |          |          |
|-----------|---------------|-------------------------------------------------------------------|----------|----------|
| 270096    | Mon1b         | MON1 homolog B, secretory trafficking associated                  | 0.62441  | 0.020699 |
| 58994     | Smpd3         | sphingomyelin phosphodiesterase 3, neutral                        | 1.742806 | 0.020705 |
| 269941    | Chsy1         | chondroitin sulfate synthase 1                                    | -0.64457 | 0.02075  |
| 100042480 | Nhsl2         | NHS-like 2                                                        | 2.229295 | 0.020752 |
| 93691     | Klf7          | Kruppel-like factor 7 (ubiquitous)                                | 1.090434 | 0.020752 |
| 96935     | Susd4         | sushi domain containing 4                                         | 1.771578 | 0.020752 |
| 226527    | Cryz12        | crystallin zeta like 2                                            | -1.38915 | 0.020759 |
| 382051    | Pdp2          | pyruvate dehydrogenase phosphatase catalytic subunit 2            | 0.63328  | 0.020759 |
| 14164     | Fgf1          | fibroblast growth factor 1                                        | -1.9869  | 0.020764 |
| 105244982 | Gm26584       | predicted gene, 26584                                             | 2.737355 | 0.020797 |
| 239408    | Tmem74        | transmembrane protein 74                                          | -2.44801 | 0.020825 |
| 100504287 | Ifi203-ps     | interferon activated gene 203, pseudogene                         | 3.050623 | 0.020862 |
| 73919     | Lym1          | LYR motif containing 1                                            | -1.28874 | 0.020862 |
| 668706    | NA            | NA                                                                | 1.768546 | 0.020862 |
| 234135    | Nsd3          | nuclear receptor binding SET domain protein 3                     | 0.735361 | 0.020862 |
| 21413     | Tcf4          | transcription factor 4                                            | -0.89364 | 0.020862 |
| 100043712 | Gm9844        | thymosin, beta 10 pseudogene                                      | -1.28748 | 0.02094  |
| 18710     | Pik3r3        | phosphoinositide-3-kinase regulatory subunit 3                    | -0.86187 | 0.020982 |
| 245865    | Spag4         | sperm associated antigen 4                                        | -0.70254 | 0.021028 |
| 12725     | Cln3          | chloride channel, voltage-sensitive 3                             | 1.183799 | 0.021135 |
| 72345     | Amer1         | APC membrane recruitment 1                                        | 1.196803 | 0.021223 |
| 195531    | Zfp982        | zinc finger protein 982                                           | -1.82884 | 0.021234 |
| 224523    | 4732491K20Rik | RIKEN cDNA 4732491K20 gene                                        | -1.28279 | 0.021304 |
| 215900    | Calhm6        | calcium homeostasis modulator family member 6                     | 1.028426 | 0.021304 |
| 107527    | Il1rl2        | interleukin 1 receptor-like 2                                     | -1.40065 | 0.021304 |
| 19261     | Sirpa         | signal-regulatory protein alpha                                   | -0.89417 | 0.021304 |
| 15395     | Hoxa10        | homeobox A10                                                      | -2.30503 | 0.02131  |
| 100042514 | Sprr2a3       | small proline-rich protein 2A3                                    | 5.445491 | 0.021415 |
| 104248    | Cabin1        | calcineurin binding protein 1                                     | 0.80915  | 0.021427 |
| 237636    | Npc1l1        | NPC1 like intracellular cholesterol transporter 1                 | 4.37241  | 0.021453 |
| 78267     | Klhdc8b       | kelch domain containing 8B                                        | 0.989265 | 0.021471 |
| 218544    | Sgtb          | small glutamine-rich tetratricopeptide repeat (TPR)-containing, b | -0.6686  | 0.021471 |
| 217214    | Nags          | N-acetylglutamate synthase                                        | 4.830122 | 0.021491 |
| 74734     | Rhoh          | ras homolog family member H                                       | -2.96285 | 0.021522 |
| 57319     | Smpd13a       | sphingomyelin phosphodiesterase, acid-like 3A                     | -1.93089 | 0.021565 |
| 14999     | H2-DMb1       | histocompatibility 2, class II, locus Mb1                         | -1.43105 | 0.021613 |
| 217304    | Cd300lb       | CD300 molecule like family member B                               | -1.93459 | 0.021625 |
| 319165    | H2ac7         | H2A clustered histone 7                                           | -2.70048 | 0.021625 |
| 18293     | Ogdh          | oxoglutarate (alpha-ketoglutarate) dehydrogenase (lipoamide)      | -0.66996 | 0.021625 |
| 29876     | Clic4         | chloride intracellular channel 4 (mitochondrial)                  | -1.08008 | 0.021676 |
| 69234     | Zfp688        | zinc finger protein 688                                           | -0.99099 | 0.021716 |
| 67255     | Zfp422        | zinc finger protein 422                                           | 0.732753 | 0.021724 |
| 74741     | C2cd5         | C2 calcium-dependent domain containing 5                          | 0.781723 | 0.021754 |
| 107239    | Carns1        | carnosine synthase 1                                              | -1.13811 | 0.021818 |
| 14225     | Fkbp1a        | FK506 binding protein 1a                                          | -0.72013 | 0.021818 |
| 244049    | Mctp2         | multiple C2 domains, transmembrane 2                              | -2.04871 | 0.021818 |
| 244281    | Myo16         | myosin XVI                                                        | 2.00607  | 0.021918 |
| 69071     | Tmem97        | transmembrane protein 97                                          | -1.02574 | 0.021918 |
| 67299     | Dock7         | dedicator of cytokinesis 7                                        | 0.661414 | 0.021982 |
| 22402     | Ccn4          | cellular communication network factor 4                           | -0.82751 | 0.022061 |
| 20750     | Spp1          | secreted phosphoprotein 1                                         | -3.03405 | 0.022078 |
| 242785    | Klhl21        | kelch-like 21                                                     | -0.80458 | 0.022094 |
| 140488    | Igf2bp3       | insulin-like growth factor 2 mRNA binding protein 3               | -1.1104  | 0.022113 |
| 192113    | Atp12a        | ATPase, H+/K+ transporting, nongastric, alpha polypeptide         | 2.711517 | 0.022133 |
| 72722     | Fam98a        | family with sequence similarity 98, member A                      | -0.77849 | 0.022133 |
| 100532730 | C230037L18Rik | RIKEN cDNA C230037L18 gene                                        | 2.549929 | 0.022229 |
| 234889    | Gucy1a2       | guanylate cyclase 1, soluble, alpha 2                             | -2.04175 | 0.022449 |
| 667100    | Rpl18-ps1     | ribosomal protein L18, pseudogene 1                               | 2.042077 | 0.022489 |
| 330914    | Arhgap32      | Rho GTPase activating protein 32                                  | 0.873865 | 0.022664 |
| 13008     | Csrp2         | cysteine and glycine-rich protein 2                               | -0.99594 | 0.022664 |
| 214895    | Lman2l        | lectin, mannose-binding 2-like                                    | 0.869192 | 0.022664 |
| 381002    | Gm5144        | predicted gene 5144                                               | -1.93498 | 0.022796 |
| 258022    | Olf1r1318     | olfactory receptor 1318                                           | -2.37709 | 0.022796 |
| 408022    | Primpol       | primase and polymerase (DNA-directed)                             | 0.723699 | 0.022797 |
| 93705     | Pcdhgb8       | protocadherin gamma subfamily B, 8                                | 2.152094 | 0.022817 |
| 213573    | Cracr2b       | calcium release activated channel regulator 2B                    | -1.15319 | 0.022854 |
| 18792     | Plau          | plasminogen activator, urokinase                                  | -0.71157 | 0.022854 |
| 80885     | Hcar2         | hydroxycarboxylic acid receptor 2                                 | -4.98392 | 0.022967 |
| 15926     | Idh1          | isocitrate dehydrogenase 1 (NADP+), soluble                       | -0.66692 | 0.022967 |
| 319997    | A630001G21Rik | RIKEN cDNA A630001G21 gene                                        | 1.233979 | 0.022972 |
| 320139    | Ptpn7         | protein tyrosine phosphatase, non-receptor type 7                 | -2.05803 | 0.022993 |
| 26415     | Mapk13        | mitogen-activated protein kinase 13                               | -2.35656 | 0.023093 |
| 320817    | Atad2b        | ATPase family, AAA domain containing 2B                           | 0.946043 | 0.023095 |
| 20312     | Cx3cl1        | chemokine (C-X3-C motif) ligand 1                                 | 0.862871 | 0.023095 |
| 14621     | Gjb4          | gap junction protein, beta 4                                      | -1.67735 | 0.023095 |

|           |               |                                                                     |          |          |
|-----------|---------------|---------------------------------------------------------------------|----------|----------|
| 231997    | Fkbp14        | FK506 binding protein 14                                            | -0.74772 | 0.023134 |
| 26970     | Pla2g2e       | phospholipase A2, group IIE                                         | -2.78217 | 0.023151 |
| 72136     | Chst14        | carbohydrate sulfotransferase 14                                    | -0.64104 | 0.023186 |
| 66261     | Tm4sf20       | transmembrane 4 L six family member 20                              | 4.999659 | 0.023198 |
| 12304     | Pdia4         | protein disulfide isomerase associated 4                            | -0.66205 | 0.023308 |
| 14302     | Frk           | fyn-related kinase                                                  | -1.03305 | 0.023427 |
| 107733    | Mrpl41        | mitochondrial ribosomal protein L41                                 | -0.73128 | 0.023461 |
| 235611    | Plxnb1        | plexin B1                                                           | 1.085069 | 0.023475 |
| 12914     | Crebbp        | CREB binding protein                                                | 0.766581 | 0.023591 |
| 23886     | Gdf15         | growth differentiation factor 15                                    | -1.72327 | 0.023591 |
| 320842    | C230035I16Rik | RIKEN cDNA C230035I16 gene                                          | 1.391253 | 0.023665 |
| 212508    | Mtg1          | mitochondrial ribosome-associated GTPase 1                          | -0.76869 | 0.02369  |
| 100504114 | Gm16907       | predicted gene, 16907                                               | -1.27694 | 0.023757 |
| 20112     | Rps6ka2       | ribosomal protein S6 kinase, polypeptide 2                          | -0.80297 | 0.02379  |
| 319172    | H2ac4         | H2A clustered histone 4                                             | -1.85742 | 0.023812 |
| 108153    | Adamts7       | a disintegrin-like and metallopeptidase (reprolysin type) with thr  | 0.989504 | 0.023817 |
| 102638921 | Gm21917       | predicted gene, 21917                                               | -4.79189 | 0.024145 |
| 110095    | Pygl          | liver glycogen phosphorylase                                        | -2.15102 | 0.024223 |
| 76650     | Srxn1         | sulfiredoxin 1 homolog (S. cerevisiae)                              | -0.63283 | 0.024336 |
| 13599     | Ecel1         | endothelin converting enzyme-like 1                                 | 3.221029 | 0.024339 |
| 18124     | Nr4a3         | nuclear receptor subfamily 4, group A, member 3                     | -2.03917 | 0.024357 |
| 20855     | Stc1          | stanniocalcin 1                                                     | 2.238387 | 0.02442  |
| 78653     | Bola3         | bola-like 3 (E. coli)                                               | -0.83708 | 0.024427 |
| 242443    | Grin3a        | glutamate receptor ionotropic, NMDA3A                               | -2.96851 | 0.024427 |
| 223989    | Marf1         | meiosis regulator and mRNA stability 1                              | 0.817218 | 0.024427 |
| 102871    | Radx          | RPA1 related single stranded DNA binding protein, X-linked          | -2.4529  | 0.024623 |
| 72709     | C1qtnf6       | C1q and tumor necrosis factor related protein 6                     | 0.64419  | 0.024661 |
| 71145     | Scara5        | scavenger receptor class A, member 5                                | 1.803201 | 0.024661 |
| 72225     | 1700003M07Rik | RIKEN cDNA 1700003M07 gene                                          | -1.38787 | 0.024715 |
| 110962    | Mbd6          | methyl-CpG binding domain protein 6                                 | 0.975339 | 0.024724 |
| 16154     | Il10ra        | interleukin 10 receptor, alpha                                      | -3.12679 | 0.024741 |
| 52377     | Rcn3          | reticulocalbin 3, EF-hand calcium binding domain                    | -1.28046 | 0.024758 |
| 383435    | Ms4a14        | membrane-spanning 4-domains, subfamily A, member 14                 | -3.10672 | 0.024841 |
| 69386     | H4c8          | H4 clustered histone 8                                              | -2.10483 | 0.024894 |
| 624124    | Rps7-ps3      | ribosomal protein S7, pseudogene 3                                  | 0.819497 | 0.025072 |
| 11608     | Agtr1b        | angiotensin II receptor, type 1b                                    | -5.44551 | 0.025132 |
| 94253     | Hecw1         | HECT, C2 and WW domain containing E3 ubiquitin protein ligase 1     | -3.91122 | 0.025183 |
| 12006     | Axin2         | axin 2                                                              | 1.825628 | 0.0252   |
| 99730     | Taf13         | TATA-box binding protein associated factor 13                       | -1.02688 | 0.0252   |
| 22224     | Usp10         | ubiquitin specific peptidase 10                                     | 0.665741 | 0.0252   |
| 75871     | Zfp821        | zinc finger protein 821                                             | 0.869733 | 0.0252   |
| 100038363 | F630028O10Rik | RIKEN cDNA F630028O10 gene                                          | -3.17942 | 0.025214 |
| 66873     | Tril          | TLR4 interactor with leucine-rich repeats                           | 2.242101 | 0.025214 |
| 13848     | Ephb6         | Eph receptor B6                                                     | 2.163193 | 0.025295 |
| 64058     | Perp          | PERP, TP53 apoptosis effector                                       | -4.92233 | 0.025295 |
| 621442    | Gm14414       | ribosomal protein S8 pseudogene                                     | 2.852876 | 0.02533  |
| 20429     | Shox2         | short stature homeobox 2                                            | 2.268126 | 0.025345 |
| 11816     | Apoe          | apolipoprotein E                                                    | -1.74708 | 0.025374 |
| 12663     | Chml          | choroideremia-like                                                  | 0.859087 | 0.025433 |
| 233977    | Ppfia1        | protein tyrosine phosphatase, receptor type, f polypeptide (PTPR    | -0.67262 | 0.02544  |
| 75495     | Morn5         | MORN repeat containing 5                                            | -4.16874 | 0.025443 |
| 11765     | Ap1g1         | adaptor protein complex AP-1, gamma 1 subunit                       | 0.707738 | 0.025448 |
| 434232    | lqck          | IQ motif containing K                                               | -1.47786 | 0.025454 |
| 232431    | Gprc5a        | G protein-coupled receptor, family C, group 5, member A             | -0.92215 | 0.025462 |
| 75115     | 4930509E16Rik | RIKEN cDNA 4930509E16 gene                                          | -2.75354 | 0.025463 |
| 213311    | Fbxl21        | F-box and leucine-rich repeat protein 21                            | -1.57169 | 0.025486 |
| 83946     | Phip          | pleckstrin homology domain interacting protein                      | 0.91996  | 0.025486 |
| 13653     | Egr1          | early growth response 1                                             | 1.724144 | 0.025607 |
| 18242     | Oat           | ornithine aminotransferase                                          | -1.05022 | 0.025705 |
| 15185     | Hdac6         | histone deacetylase 6                                               | 0.666259 | 0.025726 |
| 21789     | Tfpi2         | tissue factor pathway inhibitor 2                                   | -3.86338 | 0.025773 |
| 78334     | Cdk19         | cyclin-dependent kinase 19                                          | 0.815816 | 0.025811 |
| 244646    | Pkd1l3        | polycystic kidney disease 1 like 3                                  | 1.600662 | 0.025835 |
| 268567    | Tmem229b      | transmembrane protein 229B                                          | 1.069736 | 0.025907 |
| 242341    | Atp6v0d2      | ATPase, H+ transporting, lysosomal V0 subunit D2                    | -3.44108 | 0.025938 |
| 319636    | Fsd1l         | fibronectin type III and SPRY domain containing 1-like              | 0.711445 | 0.025938 |
| 269643    | Ppp2r2c       | protein phosphatase 2, regulatory subunit B, gamma                  | -3.95686 | 0.025938 |
| 69583     | Tnfsf13       | tumor necrosis factor (ligand) superfamily, member 13               | 0.857922 | 0.025938 |
| 84544     | Cd96          | CD96 antigen                                                        | 4.299112 | 0.026079 |
| 108138    | Xrcc4         | X-ray repair complementing defective repair in Chinese hamster      | -1.03177 | 0.026079 |
| 242620    | Dmrta2        | doublesex and mab-3 related transcription factor like family A2     | -1.99862 | 0.026116 |
| 192119    | Dicer1        | dicer 1, ribonuclease type III                                      | 0.743491 | 0.026125 |
| 23960     | Oas1g         | 2'-5' oligoadenylate synthetase 1G                                  | -2.80301 | 0.026222 |
| 243743    | Plxna4        | plexin A4                                                           | 1.348279 | 0.026259 |
| 18018     | Nfatc1        | nuclear factor of activated T cells, cytoplasmic, calcineurin depen | -0.9056  | 0.026312 |



|           |               |                                                                       |          |          |
|-----------|---------------|-----------------------------------------------------------------------|----------|----------|
| 448987    | Fbxl7         | F-box and leucine-rich repeat protein 7                               | -1.14779 | 0.02632  |
| 13527     | Dtna          | dystrobrevin alpha                                                    | -1.38606 | 0.026363 |
| 56543     | Kcnd3         | potassium voltage-gated channel, Shal-related family, member 3        | -2.72118 | 0.026363 |
| 15284     | Hlx           | H2.0-like homeobox                                                    | 0.631207 | 0.026406 |
| 171285    | Havcr2        | hepatitis A virus cellular receptor 2                                 | -2.26791 | 0.02655  |
| 97820     | 4833439L19Rik | RIKEN cDNA 4833439L19 gene                                            | -0.63199 | 0.026585 |
| 19731     | Rgl1          | ral guanine nucleotide dissociation stimulator,-like 1                | 0.829117 | 0.026585 |
| 12514     | Cd68          | CD68 antigen                                                          | -2.03932 | 0.026665 |
| 54399     | Bet1l         | Bet1 golgi vesicular membrane trafficking protein like                | -1.00558 | 0.026732 |
| 13497     | Drp2          | dystrophin related protein 2                                          | -1.76842 | 0.026732 |
| 21834     | Thrb          | thyroid hormone receptor beta                                         | 1.466075 | 0.026732 |
| 269954    | Ttl13         | tubulin tyrosine ligase-like family, member 13                        | -2.50454 | 0.026755 |
| 30785     | Ctnnbp2       | cortactin binding protein 2                                           | 3.222359 | 0.026776 |
| 56420     | Ppp4c         | protein phosphatase 4, catalytic subunit                              | -0.77995 | 0.026776 |
| 20481     | Ski           | ski sarcoma viral oncogene homolog (avian)                            | -0.6943  | 0.026864 |
| 16625     | Serpina3c     | serine (or cysteine) peptidase inhibitor, clade A, member 3C          | -3.39959 | 0.026965 |
| 56382     | Rab9          | RAB9, member RAS oncogene family                                      | 1.064455 | 0.027013 |
| 74996     | Usp47         | ubiquitin specific peptidase 47                                       | -0.62514 | 0.027097 |
| 433771    | Micos10       | mitochondrial contact site and cristae organizing system subunit 10   | 0.82384  | 0.027146 |
| 20014     | Rpn2          | ribophorin II                                                         | -0.6446  | 0.027165 |
| 18553     | Pcsk6         | proprotein convertase subtilisin/kexin type 6                         | -0.66332 | 0.027179 |
| 66912     | Bzw2          | basic leucine zipper and W2 domains 2                                 | 0.699241 | 0.027213 |
| 22417     | Wnt4          | wingless-type MMTV integration site family, member 4                  | 1.59334  | 0.02741  |
| 68598     | Dnajc8        | DnaJ heat shock protein family (Hsp40) member C8                      | -0.64977 | 0.027466 |
| 83964     | Jam3          | junction adhesion molecule 3                                          | -0.89117 | 0.027466 |
| 224902    | Safb2         | scaffold attachment factor B2                                         | 0.64938  | 0.027466 |
| 73774     | 4930422M22Rik | RIKEN cDNA 4930422M22 gene                                            | 5.214157 | 0.027479 |
| 19152     | Prtn3         | proteinase 3                                                          | 3.322224 | 0.027479 |
| 56772     | MLlt11        | myeloid/lymphoid or mixed-lineage leukemia; translocated to, 11       | -0.84252 | 0.027715 |
| 269999    | Orai3         | ORAI calcium release-activated calcium modulator 3                    | -0.8577  | 0.027715 |
| 17082     | IL1rl1        | interleukin 1 receptor-like 1                                         | -3.43351 | 0.027764 |
| 102941    | B630019K06Rik | F-box and leucine-rich repeat protein 17 pseudogene                   | -1.0413  | 0.027902 |
| 235048    | Zfp599        | zinc finger protein 599                                               | 0.900081 | 0.027946 |
| 64945     | Cldn12        | claudin 12                                                            | 0.648544 | 0.027958 |
| 69774     | Ms4a6b        | membrane-spanning 4-domains, subfamily A, member 6B                   | -3.532   | 0.028016 |
| 330671    | B4galnt4      | beta-1,4-N-acetyl-galactosaminyl transferase 4                        | 2.181212 | 0.028031 |
| 225998    | Rorb          | RAR-related orphan receptor beta                                      | -4.2016  | 0.028099 |
| 113855    | Vmn1r40       | vomerolateral 1 receptor 40                                           | -3.35213 | 0.028168 |
| 207958    | Alg11         | asparagine-linked glycosylation 11 (alpha-1,2-mannosyltransferase)    | 0.602886 | 0.028171 |
| 268281    | Shprh         | SNF2 histone linker PHD RING helicase                                 | 0.819918 | 0.028175 |
| 20364     | Selenow       | selenoprotein W                                                       | -1.10913 | 0.028189 |
| 12818     | Col14a1       | collagen, type XIV, alpha 1                                           | -2.86345 | 0.028202 |
| 66704     | Rbm4b         | RNA binding motif protein 4B                                          | 0.66253  | 0.028202 |
| 21841     | Tia1          | cytotoxic granule-associated RNA binding protein 1                    | 0.794556 | 0.028241 |
| 64292     | Ptges         | prostaglandin E synthase                                              | -1.38706 | 0.028244 |
| 329003    | Zfp516        | zinc finger protein 516                                               | 0.765951 | 0.02834  |
| 208898    | Unc13c        | unc-13 homolog C                                                      | -1.75834 | 0.028486 |
| 15504     | Dnajb3        | DnaJ heat shock protein family (Hsp40) member B3                      | -4.10976 | 0.028493 |
| 320679    | Samd12        | sterile alpha motif domain containing 12                              | -1.79078 | 0.028493 |
| 14325     | Ftl1          | ferritin light polypeptide 1                                          | -1.25764 | 0.028752 |
| 100041953 | Sap18b        | Sin3-associated polypeptide 18B                                       | -0.88107 | 0.028772 |
| 22324     | Vav1          | vav 1 oncogene                                                        | -2.7157  | 0.028784 |
| 17470     | Cd200         | CD200 antigen                                                         | -3.02777 | 0.028791 |
| 13448     | Dok1          | docking protein 1                                                     | -0.63825 | 0.028791 |
| 73656     | Ms4a6c        | membrane-spanning 4-domains, subfamily A, member 6C                   | -4.0718  | 0.028791 |
| 224829    | Trerf1        | transcriptional regulating factor 1                                   | 0.897994 | 0.028791 |
| 235184    | Msantd2       | Myb/SANT-like DNA-binding domain containing 2                         | 0.758037 | 0.028891 |
| 70564     | Prxl2a        | peroxiredoxin like 2A                                                 | 0.932888 | 0.028891 |
| 243905    | Zfp568        | zinc finger protein 568                                               | 0.625057 | 0.029006 |
| 244631    | Pskh1         | protein serine kinase H1                                              | 0.789948 | 0.029015 |
| 100039748 | Rpl15-ps6     | ribosomal protein L15, pseudogene 6                                   | 4.013843 | 0.029015 |
| 66815     | Mcub          | mitochondrial calcium uniporter dominant negative beta subunit        | -0.9075  | 0.029021 |
| 331474    | Rtl5          | retrotransposon Gag like 5                                            | -0.81311 | 0.029022 |
| 76719     | Kansl1        | KAT8 regulatory NSL complex subunit 1                                 | 0.64888  | 0.029045 |
| 209032    | Zc3hav1l      | zinc finger CCCH-type, antiviral 1-like                               | 0.720371 | 0.029091 |
| 226652    | Arhgap30      | Rho GTPase activating protein 30                                      | -2.46523 | 0.029162 |
| 100126229 | Gm12758       | predicted gene 12758                                                  | 2.470642 | 0.029162 |
| 170738    | Kcnh7         | potassium voltage-gated channel, subfamily H (eag-related), member 7  | 1.305509 | 0.029162 |
| 67046     | Tbc1d7        | TBC1 domain family, member 7                                          | -0.7732  | 0.029162 |
| 260302    | Gga3          | golgi associated, gamma adaptin ear containing, ARF binding protein 3 | 0.782894 | 0.029376 |
| 195727    | Nhs           | NHS actin remodeling regulator                                        | -1.1328  | 0.029537 |
| 224912    | Crb3          | crumbs family member 3                                                | 2.051766 | 0.029668 |
| 14630     | Gclm          | glutamate-cysteine ligase, modifier subunit                           | -0.60742 | 0.029687 |
| 414093    | A830082N09Rik | RIKEN cDNA A830082N09 gene                                            | 1.412885 | 0.029718 |
| 117599    | Helb          | helicase (DNA) B                                                      | 0.699931 | 0.029744 |



|           |               |                                                                      |          |          |
|-----------|---------------|----------------------------------------------------------------------|----------|----------|
| 60406     | Sap30         | sin3 associated polypeptide                                          | 0.766125 | 0.029758 |
| 381067    | Zfp229        | zinc finger protein 229                                              | 0.70736  | 0.029793 |
| 100502619 | AW046200      | expressed sequence AW046200                                          | 1.336295 | 0.029839 |
| 74241     | Chpf          | chondroitin polymerizing factor                                      | -0.82176 | 0.029874 |
| 22317     | Vamp1         | vesicle-associated membrane protein 1                                | 0.862566 | 0.029874 |
| 16181     | Il1rn         | interleukin 1 receptor antagonist                                    | -2.59126 | 0.029899 |
| 12583     | Cdo1          | cysteine dioxygenase 1, cytosolic                                    | -1.71053 | 0.029931 |
| 20474     | Six4          | sine oculis-related homeobox 4                                       | 1.089659 | 0.029959 |
| 213053    | Slc39a14      | solute carrier family 39 (zinc transporter), member 14               | -0.7512  | 0.029965 |
| 67180     | Yipf5         | Yip1 domain family, member 5                                         | -0.7488  | 0.03012  |
| 319161    | H4c18         | H4 clustered histone 18                                              | -2.14358 | 0.030272 |
| 23880     | Fyb           | FYN binding protein                                                  | -2.29219 | 0.030368 |
| 26410     | Map3k8        | mitogen-activated protein kinase kinase kinase 8                     | 0.963751 | 0.030394 |
| 71609     | Tradd         | TNFRSF1A-associated via death domain                                 | 0.731468 | 0.030452 |
| 11497     | Adam3         | a disintegrin and metallopeptidase domain 3 (cyritestin)             | -3.16106 | 0.030613 |
| 55963     | Slc1a4        | solute carrier family 1 (glutamate/neutral amino acid transporter    | -0.86237 | 0.030624 |
| 330812    | Rnf150        | ring finger protein 150                                              | 0.862714 | 0.030639 |
| 103963    | Rpn1          | ribophorin I                                                         | -0.76738 | 0.030703 |
| 240332    | Slc6a7        | solute carrier family 6 (neurotransmitter transporter, L-proline), i | 2.1419   | 0.03076  |
| 218885    | Oxnad1        | oxidoreductase NAD-binding domain containing 1                       | -0.74799 | 0.030777 |
| 14239     | Foxs1         | forkhead box S1                                                      | -1.62825 | 0.03079  |
| 13040     | Ctss          | cathepsin S                                                          | -3.60875 | 0.030839 |
| 170677    | Cdhr1         | cadherin-related family member 1                                     | -1.58062 | 0.030972 |
| 22017     | Tpmt          | thiopurine methyltransferase                                         | -0.76116 | 0.030982 |
| 381352    | Mamdc4        | MAM domain containing 4                                              | 1.222312 | 0.031042 |
| 234915    | Cep126        | centrosomal protein 126                                              | -1.66467 | 0.031052 |
| 100041686 | Gm15427       | predicted pseudogene 15427                                           | 0.93796  | 0.031097 |
| 223645    | Mroh6         | maestro heat-like repeat family member 6                             | 2.077884 | 0.031166 |
| 67178     | Zmat5         | zinc finger, matrin type 5                                           | -0.83634 | 0.031181 |
| 22341     | Vegfc         | vascular endothelial growth factor C                                 | -1.28145 | 0.031198 |
| 214812    | Zfp609        | zinc finger protein 609                                              | 0.928598 | 0.031295 |
| 67044     | Higd2a        | HIG1 domain family, member 2A                                        | -0.60229 | 0.031497 |
| 330450    | Far2          | fatty acyl CoA reductase 2                                           | 1.11808  | 0.031527 |
| 77866     | E130102H24Rik | RIKEN cDNA E130102H24 gene                                           | 1.718068 | 0.031529 |
| 224694    | Zfp81         | zinc finger protein 81                                               | 0.723156 | 0.031529 |
| 13805     | Eng           | endoglin                                                             | 2.12904  | 0.031565 |
| 67622     | Mxra7         | matrix-remodelling associated 7                                      | -0.63221 | 0.031617 |
| 70025     | Acot7         | acyl-CoA thioesterase 7                                              | -0.8682  | 0.031621 |
| 20280     | Scp2          | sterol carrier protein 2, liver                                      | -1.23167 | 0.03176  |
| 242202    | Pde5a         | phosphodiesterase 5A, cGMP-specific                                  | 1.813067 | 0.031819 |
| 20583     | Snai2         | snail family zinc finger 2                                           | -1.01492 | 0.031819 |
| 74840     | Manf          | mesencephalic astrocyte-derived neurotrophic factor                  | -1.04003 | 0.031963 |
| 320920    | NA            | NA                                                                   | -2.03261 | 0.031963 |
| 67704     | 1810037117Rik | RIKEN cDNA 1810037117 gene                                           | -0.84821 | 0.032203 |
| 15015     | H2-Q4         | histocompatibility 2, Q region locus 4                               | 1.366502 | 0.032219 |
| 258439    | Olfir1309     | olfactory receptor 1309                                              | -4.95633 | 0.032219 |
| 101807    | AV356131      | expressed sequence AV356131                                          | -1.27111 | 0.032261 |
| 68303     | Fam114a1      | family with sequence similarity 114, member A1                       | -0.83156 | 0.032261 |
| 14729     | Gp5           | glycoprotein 5 (platelet)                                            | 2.641404 | 0.03232  |
| 72873     | Bbof1         | basal body orientation factor 1                                      | 1.203368 | 0.03234  |
| 664883    | Nova1         | NOVA alternative splicing regulator 1                                | -2.29701 | 0.032426 |
| 15473     | Rida          | reactive intermediate imine deaminase A homolog                      | -0.6848  | 0.032426 |
| 67898     | Pef1          | penta-EF hand domain containing 1                                    | -0.63898 | 0.032442 |
| 107368    | Pdzd8         | PDZ domain containing 8                                              | 0.734923 | 0.032506 |
| 407785    | Ndufs6        | NADH:ubiquinone oxidoreductase core subunit S6                       | -0.96804 | 0.03251  |
| 102636045 | Gm16185       | predicted gene 16185                                                 | 1.476612 | 0.032677 |
| 195209    | Zfp469        | zinc finger protein 469                                              | 0.742838 | 0.032695 |
| 66191     | Ier3ip1       | immediate early response 3 interacting protein 1                     | -1.09609 | 0.032754 |
| 67528     | Nudt7         | nudix (nucleoside diphosphate linked moiety X)-type motif 7          | 0.654872 | 0.032832 |
| 20362     | Septin8       | septin 8                                                             | -0.71302 | 0.032846 |
| 78316     | Platr27       | pluripotency associated transcript 27                                | -4.64276 | 0.032866 |
| 319388    | Irx3os        | iroquois homeobox 3, opposite strand                                 | 2.991191 | 0.032877 |
| 67117     | Dynlt3        | dynein light chain Tctex-type 3                                      | -0.74693 | 0.032892 |
| 209760    | Tmc7          | transmembrane channel-like gene family 7                             | -1.49985 | 0.0329   |
| 381560    | Xkr8          | X-linked Kx blood group related 8                                    | -0.71429 | 0.0329   |
| 30843     | Fbxl12        | F-box and leucine-rich repeat protein 12                             | 0.851656 | 0.032925 |
| 11983     | Atpif1        | ATPase inhibitory factor 1                                           | -0.80138 | 0.033022 |
| 67103     | Ptgr1         | prostaglandin reductase 1                                            | -0.71167 | 0.033043 |
| 319508    | Syt15         | synaptotagmin XV                                                     | 2.170407 | 0.033082 |
| 83433     | Trem2         | triggering receptor expressed on myeloid cells 2                     | -2.05432 | 0.033082 |
| 68364     | O610030E20Rik | RIKEN cDNA O610030E20 gene                                           | 0.7314   | 0.033123 |
| 102448    | Xylb          | xylulokinase homolog (H. influenzae)                                 | 0.826766 | 0.03313  |
| 69544     | Wdr5b         | WD repeat domain 5B                                                  | 0.785818 | 0.033173 |
| 14256     | Flt3l         | FMS-like tyrosine kinase 3 ligand                                    | 0.665312 | 0.033223 |
| 244668    | Sipa1l2       | signal-induced proliferation-associated 1 like 2                     | 0.683017 | 0.033223 |

|           |               |                                                                    |          |          |
|-----------|---------------|--------------------------------------------------------------------|----------|----------|
| 53415     | Htatip2       | HIV-1 Tat interactive protein 2                                    | -1.02099 | 0.033252 |
| 72168     | Aifm3         | apoptosis-inducing factor, mitochondrion-associated 3              | 2.880549 | 0.033276 |
| 595140    | Gm6044        | peptidylprolyl isomerase A pseudogene 22                           | 3.862941 | 0.03329  |
| 12834     | Col6a2        | collagen, type VI, alpha 2                                         | 1.017765 | 0.033345 |
| 14859     | Gsta3         | glutathione S-transferase, alpha 3                                 | -1.55341 | 0.033345 |
| 56452     | Orc6          | origin recognition complex, subunit 6                              | 0.934645 | 0.033345 |
| 214301    | Crygn         | crystallin, gamma N                                                | -2.69276 | 0.033391 |
| 319743    | 9630013D21Rik | RIKEN cDNA 9630013D21 gene                                         | 1.285394 | 0.033423 |
| 28146     | Serp1         | stress-associated endoplasmic reticulum protein 1                  | -0.68973 | 0.033534 |
| 12767     | Cxcr4         | chemokine (C-X-C motif) receptor 4                                 | -3.02286 | 0.033535 |
| 639527    | Gm7269        | calcyphosphine 2 pseudogene                                        | -3.51616 | 0.033576 |
| 72043     | Sulf2         | sulfatase 2                                                        | -0.72355 | 0.033597 |
| 22651     | Zfp125        | zinc finger protein 125                                            | 0.880429 | 0.033641 |
| 75516     | Ttc32         | tetratricopeptide repeat domain 32                                 | -0.853   | 0.033679 |
| 16002     | Igf2          | insulin-like growth factor 2                                       | -2.4496  | 0.033754 |
| 81500     | Sil1          | endoplasmic reticulum chaperone SIL1 homolog (S. cerevisiae)       | -1.09532 | 0.033754 |
| 193736    | Zbtb12        | zinc finger and BTB domain containing 12                           | 0.747599 | 0.033754 |
| 14130     | Fcgr2b        | Fc receptor, IgG, low affinity IIb                                 | -3.28826 | 0.033827 |
| 104080    | Nxph4         | neurexophilin 4                                                    | -2.43536 | 0.033827 |
| 74570     | Zkscan1       | zinc finger with KRAB and SCAN domains 1                           | 0.646185 | 0.033844 |
| 66141     | Ifitm3        | interferon induced transmembrane protein 3                         | -0.90895 | 0.033869 |
| 22276     | Uros          | uroporphyrinogen III synthase                                      | -0.70993 | 0.034138 |
| 70691     | 3830403N18Rik | RIKEN cDNA 3830403N18 gene                                         | -4.79612 | 0.034242 |
| 14115     | Fbln2         | fibulin 2                                                          | -1.25221 | 0.034345 |
| 12837     | Col8a1        | collagen, type VIII, alpha 1                                       | -0.94545 | 0.034356 |
| 69655     | Cd164l2       | CD164 sialomucin-like 2                                            | -4.20519 | 0.034457 |
| 666819    | Gm8307        | ubiquitin specific peptidase 10 pseudogene                         | -4.40661 | 0.034481 |
| 66350     | Pla2g12a      | phospholipase A2, group XIA                                        | -0.9954  | 0.034544 |
| 12349     | Car2          | carbonic anhydrase 2                                               | -5.48578 | 0.034585 |
| 17248     | Mdm4          | transformed mouse 3T3 cell double minute 4                         | 0.982759 | 0.034585 |
| 101100    | Ttli3         | tubulin tyrosine ligase-like family, member 3                      | 1.365562 | 0.034585 |
| 268903    | Nrip1         | nuclear receptor interacting protein 1                             | 0.820619 | 0.034589 |
| 270086    | Ogfod1        | 2-oxoglutarate and iron-dependent oxygenase domain containing      | 0.603182 | 0.034589 |
| 19419     | Rasgrp1       | RAS guanyl releasing protein 1                                     | -2.80922 | 0.034629 |
| 242316    | Gdf6          | growth differentiation factor 6                                    | -1.38702 | 0.034637 |
| 432438    | Gm5421        | aconitase 2, mitochondrial pseudogene                              | -1.84118 | 0.034648 |
| 110959    | Nudt19        | nudix (nucleoside diphosphate linked moiety X)-type motif 19       | -0.67164 | 0.034648 |
| 19173     | Psbmb5        | proteasome (prosome, macropain) subunit, beta type 5               | -0.75431 | 0.034723 |
| 52585     | Dhrs1         | dehydrogenase/reductase (SDR family) member 1                      | -0.74511 | 0.034775 |
| 80515     | Rnf227        | ring finger protein 227                                            | 1.054083 | 0.034775 |
| 66397     | Sar1b         | secretion associated Ras related GTPase 1B                         | -0.62701 | 0.034775 |
| 13136     | Cd55          | CD55 molecule, decay accelerating factor for complement            | -1.1375  | 0.034786 |
| 78408     | Fam131a       | family with sequence similarity 131, member A                      | -1.07413 | 0.034786 |
| 235682    | Zfp445        | zinc finger protein 445                                            | 0.696413 | 0.034786 |
| 69325     | 1700012B09Rik | RIKEN cDNA 1700012B09 gene                                         | -5.11924 | 0.034821 |
| 12506     | Cd48          | CD48 antigen                                                       | -2.44099 | 0.034919 |
| 110172    | Slc35b1       | solute carrier family 35, member B1                                | -0.67086 | 0.034919 |
| 68631     | Cryl1         | crystallin, lambda 1                                               | -0.81618 | 0.03493  |
| 21838     | Thy1          | thymus cell antigen 1, theta                                       | -1.62833 | 0.03493  |
| 12861     | Cox6a1        | cytochrome c oxidase subunit 6A1                                   | -0.7434  | 0.034948 |
| 71774     | Shroom1       | shroom family member 1                                             | -0.94512 | 0.035109 |
| 69487     | Ndufa5        | NADH:ubiquinone oxidoreductase complex assembly factor 5           | -0.74825 | 0.035167 |
| 67290     | 3110040N11Rik | RIKEN cDNA 3110040N11 gene                                         | -0.71707 | 0.035177 |
| 17441     | Mog           | myelin oligodendrocyte glycoprotein                                | 3.604463 | 0.035213 |
| 67197     | Zcrb1         | zinc finger CCHC-type and RNA binding motif 1                      | -0.6028  | 0.03522  |
| 12750     | Clk4          | CDC like kinase 4                                                  | 0.637104 | 0.035339 |
| 225341    | Lims2         | LIM and senescent cell antigen like domains 2                      | -1.41506 | 0.035339 |
| 71583     | 9130008F23Rik | RIKEN cDNA 9130008F23 gene                                         | 0.756564 | 0.035364 |
| 236285    | LancI3        | LanC lantibiotic synthetase component C-like 3 (bacterial)         | -3.01951 | 0.035367 |
| 50708     | H1f2          | H1.2 linker histone, cluster member                                | -1.65836 | 0.035443 |
| 102443350 | Xndc1         | Xrcc1 N-terminal domain containing 1                               | 0.937115 | 0.035443 |
| 12362     | Casp1         | caspase 1                                                          | -2.44638 | 0.035623 |
| 12488     | Cd2ap         | CD2-associated protein                                             | 0.606687 | 0.035861 |
| 54446     | Nfat5         | nuclear factor of activated T cells 5                              | 0.776532 | 0.035888 |
| 12798     | Cnn2          | calponin 2                                                         | -0.60568 | 0.035917 |
| 53603     | Tslp          | thymic stromal lymphopoietin                                       | -1.39137 | 0.035917 |
| 236366    | 5730507C01Rik | RIKEN cDNA 5730507C01 gene                                         | -2.35951 | 0.035919 |
| 100465    | Mob3c         | MOB kinase activator 3C                                            | 0.630822 | 0.035919 |
| 67298     | Gprasp1       | G protein-coupled receptor associated sorting protein 1            | 0.817445 | 0.035995 |
| 18113     | Nnmt          | nicotinamide N-methyltransferase                                   | 0.964314 | 0.036066 |
| 54371     | Chst2         | carbohydrate sulfotransferase 2                                    | 1.298767 | 0.036236 |
| 101476    | Plekha1       | pleckstrin homology domain containing, family A (phosphoinositide) | -0.76024 | 0.036236 |
| 20850     | Stat5a        | signal transducer and activator of transcription 5A                | 0.715014 | 0.036342 |
| 114564    | Csprs         | component of Sp100-rs                                              | 4.086446 | 0.036362 |
| 78512     | 3300005D01Rik | RIKEN cDNA 3300005D01 gene                                         | -1.70534 | 0.036373 |

|           |               |                                                                    |          |          |
|-----------|---------------|--------------------------------------------------------------------|----------|----------|
| 12389     | Cav1          | caveolin 1, caveolae protein                                       | -1.14678 | 0.036373 |
| 13656     | Egr4          | early growth response 4                                            | 4.87867  | 0.036573 |
| 19220     | Ptgfr         | prostaglandin F receptor                                           | -2.32831 | 0.036615 |
| 18023     | Nfe2l1        | nuclear factor, erythroid derived 2,-like 1                        | -0.69889 | 0.036649 |
| 207495    | Baiap2l2      | BAI1-associated protein 2-like 2                                   | 1.027402 | 0.03667  |
| 75769     | Plppr5        | phospholipid phosphatase related 5                                 | -3.80748 | 0.036797 |
| 240913    | Adamts4       | a disintegrin-like and metallopeptidase (repolysin type) with thr  | -0.91698 | 0.036856 |
| 192185    | Nadk          | NAD kinase                                                         | -0.75513 | 0.036895 |
| 83409     | Lamtor2       | late endosomal/lysosomal adaptor, MAPK and MTOR activator 2        | -1.10978 | 0.036974 |
| 319207    | Pgbd1         | piggyBac transposable element derived 1                            | -1.30455 | 0.036985 |
| 208748    | Prrg3         | proline rich Gla (G-carboxyglutamic acid) 3 (transmembrane)        | 0.775815 | 0.037003 |
| 68108     | Snhg17        | small nucleolar RNA host gene 17                                   | 0.843667 | 0.037007 |
| 15248     | Hic1          | hypermethylated in cancer 1                                        | -0.68193 | 0.037021 |
| 234695    | Carmil2       | capping protein regulator and myosin 1 linker 2                    | 1.509498 | 0.037091 |
| 27384     | Akr1c13       | aldo-keto reductase family 1, member C13                           | -3.90413 | 0.037092 |
| 17969     | Ncf1          | neutrophil cytosolic factor 1                                      | -2.44077 | 0.037103 |
| 53412     | Ppp1r3c       | protein phosphatase 1, regulatory subunit 3C                       | 1.604849 | 0.037103 |
| 24056     | Sh3bp5        | SH3-domain binding protein 5 (BTK-associated)                      | -0.90866 | 0.037106 |
| 12842     | Col1a1        | collagen, type I, alpha 1                                          | 0.814455 | 0.037344 |
| 65113     | Ndfip1        | Nedd4 family interacting protein 1                                 | -0.67007 | 0.037417 |
| 246313    | Prokr2        | prokineticin receptor 2                                            | 3.914065 | 0.037461 |
| 77097     | Tanc2         | tetratricopeptide repeat, ankyrin repeat and coiled-coil containin | 1.090838 | 0.037461 |
| 11733     | Ank1          | ankyrin 1, erythroid                                               | 1.582377 | 0.037473 |
| 72309     | Tmem158       | transmembrane protein 158                                          | -1.53115 | 0.037542 |
| 74154     | Unkl          | unkempt family like zinc finger                                    | 0.740668 | 0.037573 |
| 380694    | Ccnj          | cyclin J-like                                                      | 2.856553 | 0.037655 |
| 14465     | Gata6         | GATA binding protein 6                                             | 1.028038 | 0.03781  |
| 11639     | Ak4           | adenylate kinase 4                                                 | -1.30774 | 0.037815 |
| 64929     | Scel          | sciellin                                                           | 2.06974  | 0.037815 |
| 235406    | Snx33         | sorting nexin 33                                                   | 0.633864 | 0.037815 |
| 230126    | Shb           | src homology 2 domain-containing transforming protein B            | 0.706058 | 0.037824 |
| 74732     | Stx11         | syntaxin 11                                                        | 0.619513 | 0.037842 |
| 338370    | Nalcn         | sodium leak channel, non-selective                                 | -4.37753 | 0.03785  |
| 192654    | Pla2g15       | phospholipase A2, group XV                                         | -0.88483 | 0.037853 |
| 320772    | Mdga2         | MAM domain containing glycosylphosphatidylinositol anchor 2        | -4.50372 | 0.037859 |
| 56857     | Slc37a2       | solute carrier family 37 (glycerol-3-phosphate transporter), mem   | -1.37375 | 0.037859 |
| 217012    | Unc45b        | unc-45 myosin chaperone B                                          | 2.254446 | 0.038046 |
| 78892     | Crispld2      | cysteine-rich secretory protein LCCL domain containing 2           | 1.586463 | 0.038079 |
| 67876     | Coq10b        | coenzyme Q10B                                                      | -0.63969 | 0.038093 |
| 12833     | Col6a1        | collagen, type VI, alpha 1                                         | 0.964361 | 0.038165 |
| 17984     | Ndn           | necdin, MAGE family member                                         | -1.3242  | 0.038351 |
| 319586    | Celf5         | CUGBP, Elav-like family member 5                                   | -1.10423 | 0.038449 |
| 14828     | Hspa5         | heat shock protein 5                                               | -0.7627  | 0.038449 |
| 54393     | Gabbr1        | gamma-aminobutyric acid (GABA) B receptor, 1                       | 0.621794 | 0.038454 |
| 105245938 | Gm26704       | predicted gene, 26704                                              | 2.233659 | 0.038479 |
| 16783     | Lamp1         | lysosomal-associated membrane protein 1                            | -0.65857 | 0.038524 |
| 100415915 | A530072M11Rik | RIKEN cDNA gene A530072M11                                         | -2.34018 | 0.038762 |
| 78779     | Spta2l        | spermatogenesis associated 2-like                                  | 0.854064 | 0.038767 |
| 107652    | Uap1          | UDP-N-acetylglucosamine pyrophosphorylase 1                        | -0.65054 | 0.038979 |
| 320790    | Chd7          | chromodomain helicase DNA binding protein 7                        | -1.89151 | 0.039035 |
| 666586    | Gm11808       | ubiquitin A-52 residue ribosomal protein fusion product 1 pseud    | 0.937148 | 0.039042 |
| 213084    | Cdkl3         | cyclin-dependent kinase-like 3                                     | -0.62844 | 0.039091 |
| 53608     | Map3k6        | mitogen-activated protein kinase kinase kinase 6                   | -1.17447 | 0.039091 |
| 17831     | Muc2          | mucin 2                                                            | 1.579632 | 0.039111 |
| 320299    | Iqcb1         | IQ calmodulin-binding motif containing 1                           | 0.853266 | 0.039134 |
| 16456     | F11r          | F11 receptor                                                       | 1.107362 | 0.039209 |
| 19283     | Ptprz1        | protein tyrosine phosphatase, receptor type Z, polypeptide 1       | 2.356458 | 0.039242 |
| 69065     | Chac1         | ChaC, cation transport regulator 1                                 | -1.17909 | 0.039269 |
| 13601     | Ecm1          | extracellular matrix protein 1                                     | -1.06919 | 0.039316 |
| 17988     | Ndrg1         | N-myc downstream regulated gene 1                                  | -1.81509 | 0.039325 |
| 338523    | Kdm7a         | lysine (K)-specific demethylase 7A                                 | 1.036885 | 0.039393 |
| 229007    | Zgpat         | zinc finger, CCCH-type with G patch domain                         | 0.719299 | 0.039393 |
| 14066     | F3            | coagulation factor III                                             | -1.19451 | 0.03948  |
| 15424     | Hoxc5         | homeobox C5                                                        | 2.730859 | 0.03948  |
| 76123     | Gpsm2         | G-protein signalling modulator 2 (AGS3-like, C. elegans)           | -1.48826 | 0.039507 |
| 16855     | Lgals4        | lectin, galactose binding, soluble 4                               | 1.386159 | 0.039598 |
| 69632     | Arhgef12      | Rho guanine nucleotide exchange factor (GEF) 12                    | 0.701834 | 0.039709 |
| 100418381 | Gm16209       | translocase of inner mitochondrial membrane 23 homolog pseud       | 1.481596 | 0.039753 |
| 12955     | Cryab         | crystallin, alpha B                                                | -0.65551 | 0.03978  |
| 68922     | Dnaic1        | dynein, axonemal, intermediate chain 1                             | -4.10036 | 0.039783 |
| 170744    | Tlr8          | toll-like receptor 8                                               | -2.53421 | 0.039878 |
| 211147    | Marchf11      | membrane associated ring-CH-type finger 11                         | -4.39128 | 0.039885 |
| 79362     | Bhlhe41       | basic helix-loop-helix family, member e41                          | -0.94183 | 0.03991  |
| 382427    | Best3         | bestrophin 3                                                       | -2.09961 | 0.040063 |
| 15024     | H2-T10        | histocompatibility 2, T region locus 10                            | 1.576618 | 0.040268 |

|           |               |                                                                      |           |          |
|-----------|---------------|----------------------------------------------------------------------|-----------|----------|
| 328329    | Mast4         | microtubule associated serine/threonine kinase family member 4       | 0.615605  | 0.040273 |
| 14345     | Fut4          | fucosyltransferase 4                                                 | -1.42558  | 0.040313 |
| 17035     | Lxn           | latexin                                                              | -1.18529  | 0.040313 |
| 406218    | Panx2         | pannexin 2                                                           | 2.425589  | 0.040313 |
| 240034    | Zfp760        | zinc finger protein 760                                              | 0.762781  | 0.040476 |
| 244349    | Kat6a         | K(lysine) acetyltransferase 6A                                       | 1.006529  | 0.040477 |
| 241950    | Bbs12         | Bardet-Biedl syndrome 12 (human)                                     | 0.79221   | 0.040557 |
| 634386    | Ftl1-ps1      | ferritin light polypeptide 1, pseudogene 1                           | -1.46315  | 0.040567 |
| 192734    | Lrrc75b       | leucine rich repeat containing 75B                                   | -1.37608  | 0.040567 |
| 19332     | Rab20         | RAB20, member RAS oncogene family                                    | 0.85381   | 0.040567 |
| 75646     | Rai14         | retinoic acid induced 14                                             | -0.63524  | 0.040567 |
| 230863    | Sh2d5         | SH2 domain containing 5                                              | 1.279349  | 0.040567 |
| 20842     | Stag1         | stromal antigen 1                                                    | 0.64814   | 0.040567 |
| 13876     | Erg           | ETS transcription factor                                             | -3.16246  | 0.040572 |
| 78388     | Mvp           | major vault protein                                                  | -0.7287   | 0.040572 |
| 223433    | Otulinl       | OTU deubiquitinase with linear linkage specificity like              | -2.48892  | 0.040572 |
| 115487914 | Gm25835       | predicted gene, 25835                                                | 1.489464  | 0.040594 |
| 217305    | CD300ld       | CD300 molecule like family member d                                  | -2.37684  | 0.04062  |
| 382118    | Zkscan7       | zinc finger with KRAB and SCAN domains 7                             | 0.753029  | 0.040723 |
| 271849    | Shc4          | SHC (Src homology 2 domain containing) family, member 4              | -1.11522  | 0.04082  |
| 26412     | Map4k2        | mitogen-activated protein kinase kinase kinase 2                     | 0.993174  | 0.040918 |
| 16656     | Hivep3        | human immunodeficiency virus type I enhancer binding protein 3       | 0.932104  | 0.041012 |
| 193022    | Gm53          | predicted gene 53                                                    | -2.28089  | 0.041024 |
| 102614    | Rpp25         | ribonuclease P/MRP 25 subunit                                        | -1.16135  | 0.041046 |
| 13845     | Ephb3         | Eph receptor B3                                                      | 0.699233  | 0.041108 |
| 17079     | Cd180         | CD180 antigen                                                        | -2.3274   | 0.041114 |
| 68970     | Dcaf12        | DDB1 and CUL4 associated factor 12                                   | 0.639413  | 0.041134 |
| 66593     | Diablo        | diablo, IAP-binding mitochondrial protein                            | 0.699748  | 0.041148 |
| 18173     | Slc11a1       | solute carrier family 11 (proton-coupled divalent metal ion transp   | -2.36358  | 0.04115  |
| 105446    | Gmpr2         | guanosine monophosphate reductase 2                                  | -0.60903  | 0.041232 |
| 230088    | Fam214b       | family with sequence similarity 214, member B                        | -0.78849  | 0.04125  |
| 20130     | Rras          | related RAS viral (r-ras) oncogene                                   | -0.96364  | 0.041291 |
| 11989     | Slc7a3        | solute carrier family 7 (cationic amino acid transporter, y+ system  | 0.883291  | 0.041291 |
| 100129    | Gpr153        | G protein-coupled receptor 153                                       | 1.200781  | 0.041503 |
| 235281    | Scn3b         | sodium channel, voltage-gated, type III, beta                        | -1.43819  | 0.041514 |
| 117167    | Steap4        | STEAP family member 4                                                | 1.547175  | 0.041514 |
| 116870    | Mta1          | metastasis associated 1                                              | 0.617968  | 0.041627 |
| 100504464 | E230016K23Rik | RIKEN cDNA E230016K23 gene                                           | 1.237297  | 0.04164  |
| 100504307 | Gm20163       | predicted gene, 20163                                                | 1.548946  | 0.041706 |
| 78921     | 9130019O22Rik | RIKEN cDNA 9130019O22 gene                                           | -0.96019  | 0.041806 |
| 19009     | Pou6f1        | POU domain, class 6, transcription factor 1                          | 0.760837  | 0.041946 |
| 19299     | Abcd3         | ATP-binding cassette, sub-family D (ALD), member 3                   | -0.61548  | 0.042031 |
| 14586     | Gfra2         | glial cell line derived neurotrophic factor family receptor alpha 2  | -3.82983  | 0.042031 |
| 18187     | Nrp2          | neuropilin 2                                                         | -1.43533  | 0.042053 |
| 21380     | Tbx1          | T-box 1                                                              | -9.07901  | 0.042086 |
| 16911     | Lmo4          | LIM domain only 4                                                    | -0.85337  | 0.042088 |
| 224703    | Marchf2       | membrane associated ring-CH-type finger 2                            | -0.67667  | 0.042088 |
| 71970     | Zbed5         | zinc finger, BED type containing 5                                   | 0.690907  | 0.042088 |
| 17916     | Myo1f         | myosin IF                                                            | -2.22379  | 0.042141 |
| 76365     | Tbx18         | T-box18                                                              | -0.83993  | 0.042213 |
| 12843     | Col1a2        | collagen, type I, alpha 2                                            | 0.659568  | 0.042259 |
| 18858     | Pmp22         | peripheral myelin protein 22                                         | -1.22047  | 0.042397 |
| 108089    | Rnf144a       | ring finger protein 144A                                             | 1.183664  | 0.042397 |
| 22377     | Wbp1          | WW domain binding protein 1                                          | -0.66578  | 0.04241  |
| 69190     | Dym           | dymeclin                                                             | -0.64132  | 0.042496 |
| 14744     | Gpr65         | G-protein coupled receptor 65                                        | -3.30127  | 0.042497 |
| 219144    | Arl11         | ADP-ribosylation factor-like 11                                      | -2.87777  | 0.04253  |
| 18994     | Pou3f4        | POU domain, class 3, transcription factor 4                          | -2.85906  | 0.042614 |
| 67890     | Ufm1          | ubiquitin-fold modifier 1                                            | -0.72139  | 0.042669 |
| 231842    | Amz1          | archaelysin family metallopeptidase 1                                | -1.69161  | 0.042715 |
| 11307     | Abcg1         | ATP binding cassette subfamily G member 1                            | -2.26708  | 0.042806 |
| 13590     | Lefty1        | left right determination factor 1                                    | -0.7478   | 0.042806 |
| 77300     | Raph1         | Ras association (RalGDS/AF-6) and pleckstrin homology domains        | 11.036116 | 0.042849 |
| 14766     | Adgrg1        | adhesion G protein-coupled receptor G1                               | -1.26751  | 0.042875 |
| 94060     | Lce3c         | late cornified envelope 3C                                           | 4.883196  | 0.043033 |
| 71382     | Pex1          | peroxisomal biogenesis factor 1                                      | 0.687163  | 0.043033 |
| 229776    | Cdc14a        | CDC14 cell division cycle 14A                                        | 0.63448   | 0.043033 |
| 100039239 | Gm2115        | predicted gene 2115                                                  | -1.62076  | 0.043033 |
| 80902     | Zfp202        | zinc finger protein 202                                              | 0.816485  | 0.043033 |
| 213742    | Xist          | inactive X specific transcripts                                      | 1.183278  | 0.043194 |
| 54201     | Zfp316        | zinc finger protein 316                                              | 0.674756  | 0.043244 |
| 228366    | Large2        | LARGE xylosyl- and glucuronyltransferase 2                           | 2.926578  | 0.043486 |
| 108078    | Olr1          | oxidized low density lipoprotein (lectin-like) receptor 1            | -0.81091  | 0.043486 |
| 18020     | Nfatc2ip      | nuclear factor of activated T cells, cytoplasmic, calcineurin depend | -0.69001  | 0.04353  |
| 21848     | Trim24        | tripartite motif-containing 24                                       | 0.641918  | 0.04357  |

|           |               |                                                                           |          |          |
|-----------|---------------|---------------------------------------------------------------------------|----------|----------|
| 68949     | Zfas1         | zinc finger, NFX1-type containing 1, antisense RNA 1                      | 0.765662 | 0.04357  |
| 74393     | Map10         | microtubule-associated protein 10                                         | -1.6168  | 0.043887 |
| 320469    | 9930014A18Rik | RIKEN cDNA 9930014A18 gene                                                | 1.228773 | 0.043889 |
| 58805     | Mlxip1        | MLX interacting protein-like                                              | 2.429317 | 0.044016 |
| 13058     | Cybb          | cytochrome b-245, beta polypeptide                                        | -2.31886 | 0.044065 |
| 109151    | Chd9          | chromodomain helicase DNA binding protein 9                               | 0.765629 | 0.044269 |
| 50776     | Polg2         | polymerase (DNA directed), gamma 2, accessory subunit                     | 0.650131 | 0.044269 |
| 13521     | Slc26a2       | solute carrier family 26 (sulfate transporter), member 2                  | -0.65062 | 0.044309 |
| 230700    | Foxj3         | forkhead box J3                                                           | 0.69734  | 0.044323 |
| 68170     | Iftap         | intraflagellar transport associated protein                               | -0.84136 | 0.044347 |
| 70676     | Gulp1         | GULP, engulfment adaptor PTB domain containing 1                          | -0.62629 | 0.044354 |
| 237313    | IL20ra        | interleukin 20 receptor, alpha                                            | 1.755415 | 0.044354 |
| 113847    | Vmn1r43       | vomerolateral 1 receptor 43                                               | -2.01964 | 0.044354 |
| 19122     | Prnp          | prion protein                                                             | -0.97472 | 0.044382 |
| 19221     | Ptgfrn        | prostaglandin F2 receptor negative regulator                              | -0.73212 | 0.044384 |
| 67695     | Ost4          | oligosaccharyltransferase complex subunit 4 (non-catalytic)               | -0.86465 | 0.044392 |
| 67880     | Dcxr          | dicarbonyl L-xylulose reductase                                           | -0.77152 | 0.044462 |
| 235626    | Setd2         | SET domain containing 2                                                   | 0.662363 | 0.044503 |
| 14432     | Gap43         | growth associated protein 43                                              | -3.1829  | 0.044655 |
| 11856     | Arhgap6       | Rho GTPase activating protein 6                                           | -0.91232 | 0.044693 |
| 18751     | Prkcb         | protein kinase C, beta                                                    | -2.12616 | 0.044696 |
| 338365    | Slc41a2       | solute carrier family 41, member 2                                        | -0.84599 | 0.04478  |
| 108167550 | Gm38250       | predicted gene, 38250                                                     | -1.65931 | 0.044844 |
| 71607     | Snx20         | sorting nexin 20                                                          | -2.54484 | 0.045063 |
| 20597     | Smpd1         | sphingomyelin phosphodiesterase 1, acid lysosomal                         | -0.7394  | 0.04514  |
| 100039441 | Gm2237        | predicted gene 2237                                                       | 0.934411 | 0.04516  |
| 100039045 | Gm10471       | predicted gene 10471                                                      | 4.413081 | 0.045261 |
| 75761     | Apol7a        | apolipoprotein L 7a                                                       | -1.6309  | 0.045279 |
| 26913     | Gprn1         | G protein-regulated inducer of neurite outgrowth 1                        | 1.340137 | 0.045484 |
| 320452    | P4ha3         | procollagen-proline, 2-oxoglutarate 4-dioxygenase (proline 4-hydroxylase) | 0.779276 | 0.045548 |
| 75079     | Zbtb49        | zinc finger and BTB domain containing 49                                  | 0.772935 | 0.045591 |
| 11490     | Adam15        | a disintegrin and metalloproteinase domain 15 (metagardian)               | -0.95301 | 0.045649 |
| 21933     | Tnfrsf10b     | tumor necrosis factor receptor superfamily, member 10b                    | -0.71618 | 0.045686 |
| 13972     | Gnb1l         | guanine nucleotide binding protein (G protein), beta polypeptide          | 0.622778 | 0.04573  |
| 13480     | Dpm1          | dolichol-phosphate (beta-D) mannosyltransferase 1                         | 0.73523  | 0.045832 |
| 72175     | Mfsd8         | major facilitator superfamily domain containing 8                         | -0.99065 | 0.045832 |
| 277360    | Prex1         | phosphatidylinositol-3,4,5-trisphosphate-dependent Rac exchange factor 1  | -1.74799 | 0.045832 |
| 434438    | Iho1          | interactor of HORMAD1 1                                                   | -5.06919 | 0.045856 |
| 14767     | Nmur1         | neuromedin U receptor 1                                                   | -3.44897 | 0.046083 |
| 100379143 | Gm9754        | predicted gene 9754                                                       | 1.683835 | 0.046114 |
| 16516     | Kcnj15        | potassium inwardly-rectifying channel, subfamily J, member 15             | 1.218407 | 0.046114 |
| 20509     | Slc19a1       | solute carrier family 19 (folate transporter), member 1                   | 0.672685 | 0.046172 |
| 101055758 | Gm7592        | predicted gene 7592                                                       | 3.919417 | 0.04625  |
| 628900    | Serpina3i     | serine (or cysteine) peptidase inhibitor, clade A, member 3i              | -1.02391 | 0.04625  |
| 100040944 | Gm3055        | predicted gene 3055                                                       | 1.267257 | 0.046344 |
| 69276     | Sec62         | SEC62 homolog (S. cerevisiae)                                             | -0.92579 | 0.046749 |
| 195522    | Zfp691        | zinc finger protein 691                                                   | 0.641151 | 0.046813 |
| 16161     | IL12rb1       | interleukin 12 receptor, beta 1                                           | 1.417691 | 0.046818 |
| 76980     | Ube2ql1       | ubiquitin-conjugating enzyme E2Q family-like 1                            | -4.29845 | 0.046834 |
| 18755     | Prkch         | protein kinase C, eta                                                     | -2.05131 | 0.046972 |
| 270624    | Spin4         | spindlin family, member 4                                                 | 0.838555 | 0.047005 |
| 105246847 | Gm14963       | predicted gene 14963                                                      | -3.12554 | 0.047032 |
| 67840     | Mrpl57        | mitochondrial ribosomal protein L57                                       | -0.60313 | 0.047062 |
| 223646    | Naprt         | nicotinate phosphoribosyltransferase                                      | 0.763987 | 0.047062 |
| 26563     | Ror1          | receptor tyrosine kinase-like orphan receptor 1                           | -1.31611 | 0.047074 |
| 70615     | Ankrd24       | ankyrin repeat domain 24                                                  | 0.678328 | 0.047076 |
| 212728    | Tarbp1        | TAR RNA binding protein 1                                                 | 0.95233  | 0.047099 |
| 101604    | E430018J23Rik | RIKEN cDNA E430018J23 gene                                                | -0.99365 | 0.047144 |
| 19300     | Abcd4         | ATP-binding cassette, sub-family D (ALD), member 4                        | 0.639732 | 0.047212 |
| 57781     | Cd200r1       | CD200 receptor 1                                                          | -2.64281 | 0.047222 |
| 14165     | Fgf10         | fibroblast growth factor 10                                               | -1.65561 | 0.047222 |
| 100216455 | Gm14124       | predicted gene 14124                                                      | 2.468747 | 0.047317 |
| 240817    | Teddm2        | transmembrane epididymal family member 2                                  | 1.521659 | 0.047317 |
| 114679    | Selenom       | selenoprotein M                                                           | -1.14151 | 0.047319 |
| 70333     | Cd3eap        | CD3E antigen, epsilon polypeptide associated protein                      | -0.62866 | 0.047358 |
| 56490     | Zbtb20        | zinc finger and BTB domain containing 20                                  | 1.050712 | 0.04737  |
| 233893    | Zfp764        | zinc finger protein 764                                                   | -0.77911 | 0.047574 |
| 269401    | Zfp512b       | zinc finger protein 512B                                                  | 0.82831  | 0.047617 |
| 19165     | Psen2         | presenilin 2                                                              | 0.900895 | 0.047698 |
| 407812    | Zfp941        | zinc finger protein 941                                                   | 1.239409 | 0.047698 |
| 20322     | Sord          | sorbitol dehydrogenase                                                    | 0.618184 | 0.047756 |
| 237775    | Zfp867        | zinc finger protein 867                                                   | 0.802088 | 0.047835 |
| 12661     | Chl1          | cell adhesion molecule L1-like                                            | 1.864121 | 0.047919 |
| 70083     | Metrn         | metastrophin, glial cell differentiation regulator                        | -1.03683 | 0.048003 |
| 104718    | Ttc7b         | tetratricopeptide repeat domain 7B                                        | 0.739727 | 0.048106 |

|           |               |                                                              |          |          |
|-----------|---------------|--------------------------------------------------------------|----------|----------|
| 66537     | Pomp          | proteasome maturation protein                                | -0.6473  | 0.048144 |
| 319150    | H3c2          | H3 clustered histone 2                                       | -1.98693 | 0.048159 |
| 21940     | Cd27          | CD27 antigen                                                 | 2.024794 | 0.048201 |
| 72397     | Rbm12b1       | RNA binding motif protein 12 B1                              | 1.200364 | 0.048242 |
| 68017     | Mrm2          | mitochondrial rRNA methyltransferase 2                       | -0.6019  | 0.048414 |
| 269061    | Cpsf7         | cleavage and polyadenylation specific factor 7               | 0.726047 | 0.048461 |
| 67698     | Fam174a       | family with sequence similarity 174, member A                | -0.85433 | 0.048461 |
| 74134     | Cyp2s1        | cytochrome P450, family 2, subfamily s, polypeptide 1        | 1.867083 | 0.048475 |
| 72701     | Zfp618        | zinc finger protein 618                                      | -1.19758 | 0.048517 |
| 78923     | Chsy3         | chondroitin sulfate synthase 3                               | -2.43246 | 0.048583 |
| 217430    | Pqlc3         | PQ loop repeat containing                                    | -1.07983 | 0.048609 |
| 246196    | Zfp277        | zinc finger protein 277                                      | 0.731147 | 0.048653 |
| 75796     | Cdyl2         | chromodomain protein, Y chromosome-like 2                    | 0.940243 | 0.048753 |
| 545557    | Gm12474       | predicted gene 12474                                         | 2.739933 | 0.048753 |
| 76205     | Stard3nl      | STAR3 N-terminal like                                        | -0.63439 | 0.048753 |
| 59052     | Mettl9        | methyltransferase like 9                                     | -0.71973 | 0.048776 |
| 546546    | Serpina3h     | serine (or cysteine) peptidase inhibitor, clade A, member 3H | -2.41129 | 0.048783 |
| 12075     | Bfsp1         | beaded filament structural protein 1, in lens-CP94           | -1.95307 | 0.048831 |
| 108167733 | Gm10138       | predicted gene 10138                                         | -0.64771 | 0.048831 |
| 19277     | Ptpro         | protein tyrosine phosphatase, receptor type, O               | -2.64003 | 0.048901 |
| 100043045 | Gm4189        | predicted gene 4189                                          | 1.46732  | 0.048923 |
| 277978    | Exoc3l        | exocyst complex component 3-like                             | 0.887492 | 0.048929 |
| 18227     | Nr4a2         | nuclear receptor subfamily 4, group A, member 2              | -0.82244 | 0.048929 |
| 73174     | Tbkbp1        | TBK1 binding protein 1                                       | 1.235    | 0.048929 |
| 68027     | Tmem178       | transmembrane protein 178                                    | 0.669653 | 0.048945 |
| 26943     | Serinc3       | serine incorporator 3                                        | -0.7302  | 0.048997 |
| 102631905 | Gm30122       | predicted gene, 30122                                        | 1.116639 | 0.049037 |
| 14924     | Magi1         | membrane associated guanylate kinase, WW and PDZ domain co   | -0.78134 | 0.049083 |
| 78896     | Ecrg4         | ECRG4 augurin precursor                                      | -3.3928  | 0.04916  |
| 29816     | Hip1r         | huntingtin interacting protein 1 related                     | 0.694785 | 0.049162 |
| 54123     | Irf7          | interferon regulatory factor 7                               | -1.42489 | 0.049168 |
| 217166    | Nr1d1         | nuclear receptor subfamily 1, group D, member 1              | -0.89551 | 0.049252 |
| 238988    | Erc2          | ELKS/RAB6-interacting/CAST family member 2                   | 1.95309  | 0.04926  |
| 14472     | Gbx2          | gastrulation brain homeobox 2                                | -1.72613 | 0.049273 |
| 108899    | 2700081O15Rik | RIKEN cDNA 2700081O15 gene                                   | 0.780393 | 0.04938  |
| 217826    | Kcnk13        | potassium channel, subfamily K, member 13                    | -2.33112 | 0.04941  |
| 140795    | P2ry14        | purinergic receptor P2Y, G-protein coupled, 14               | -5.785   | 0.04941  |
| 14131     | Fcgr3         | Fc receptor, IgG, low affinity III                           | -3.07059 | 0.049423 |
| 18022     | Nfe2          | nuclear factor, erythroid derived 2                          | 2.884873 | 0.049423 |
| 213696    | Duoxa1        | dual oxidase maturation factor 1                             | 1.797489 | 0.049482 |
| 67525     | Trim62        | tripartite motif-containing 62                               | -0.70775 | 0.049626 |
| 112415    | Zfp607b       | zinc finger protein 607B                                     | 0.978474 | 0.049732 |
| 73942     | Fam151b       | family with sequence similarity 151, member B                | -1.05538 | 0.049738 |
| 73652     | 2210408F21Rik | RIKEN cDNA 2210408F21 gene                                   | -0.98857 | 0.049822 |
| 20308     | Ccl9          | chemokine (C-C motif) ligand 9                               | -1.58546 | 0.049822 |
| 233806    | Tmem159       | transmembrane protein 159                                    | -1.12498 | 0.049934 |
| 258508    | Olfir99       | olfactory receptor 99                                        | 2.674203 | 0.049956 |
| 100503386 | Tpbgl         | trophoblast glycoprotein-like                                | -2.0867  | 0.049964 |

**Supp. Table S2: Impacted pathways.** Count DE column shows the DEGs identified in hIGFBP5 pFBs that belong to a given pathway, and the count ALL column shows all the genes in the pathway as defined by KEGG.

| Pathway Name                                                            | count DE | count All | p-value  |
|-------------------------------------------------------------------------|----------|-----------|----------|
| Cytokine-cytokine receptor interaction                                  | 52       | 163       | 6.45E-07 |
| Focal adhesion                                                          | 47       | 187       | 2.46E-05 |
| Staphylococcus aureus infection                                         | 14       | 37        | 3.04E-05 |
| Viral protein interaction with cytokine and cytokine receptor           | 18       | 50        | 6.95E-05 |
| AGE-RAGE signaling pathway in diabetic complications                    | 34       | 98        | 1.29E-04 |
| Systemic lupus erythematosus                                            | 20       | 77        | 1.97E-04 |
| Proteoglycans in cancer                                                 | 54       | 186       | 2.79E-04 |
| Chemokine signaling pathway                                             | 35       | 147       | 7.48E-04 |
| Neuroactive ligand-receptor interaction                                 | 38       | 133       | 1.10E-03 |
| Calcium signaling pathway                                               | 34       | 150       | 2.06E-03 |
| Pentose and glucuronate interconversions                                | 10       | 19        | 2.07E-03 |
| Axon guidance                                                           | 43       | 163       | 2.15E-03 |
| Chagas disease                                                          | 27       | 87        | 2.58E-03 |
| Platelet activation                                                     | 30       | 108       | 2.97E-03 |
| MicroRNAs in cancer                                                     | 42       | 161       | 3.09E-03 |
| Renin secretion                                                         | 16       | 57        | 3.34E-03 |
| PI3K-Akt signaling pathway                                              | 67       | 288       | 3.38E-03 |
| Complement and coagulation cascades                                     | 16       | 50        | 4.48E-03 |
| Prion disease                                                           | 43       | 229       | 4.72E-03 |
| Rap1 signaling pathway                                                  | 46       | 188       | 5.01E-03 |
| Human papillomavirus infection                                          | 66       | 294       | 7.55E-03 |
| Leukocyte transendothelial migration                                    | 26       | 84        | 8.38E-03 |
| Bacterial invasion of epithelial cells                                  | 21       | 71        | 8.57E-03 |
| Glycosaminoglycan biosynthesis - chondroitin sulfate / dermatan sulfate | 9        | 19        | 8.68E-03 |
| Glycosphingolipid biosynthesis - lacto and neolacto series              | 9        | 19        | 8.68E-03 |
| Signaling pathways regulating pluripotency of stem cells                | 31       | 109       | 8.70E-03 |
| Cortisol synthesis and secretion                                        | 15       | 55        | 1.04E-02 |
| Malaria                                                                 | 14       | 36        | 1.09E-02 |
| MAPK signaling pathway                                                  | 57       | 253       | 1.30E-02 |
| Epstein-Barr virus infection                                            | 43       | 174       | 1.38E-02 |
| Vascular smooth muscle contraction                                      | 24       | 103       | 1.58E-02 |
| Retinol metabolism                                                      | 11       | 28        | 1.61E-02 |
| ECM-receptor interaction                                                | 23       | 75        | 1.66E-02 |
| Folate biosynthesis                                                     | 9        | 21        | 1.78E-02 |
| Gastric cancer                                                          | 31       | 124       | 1.94E-02 |
| cGMP-PKG signaling pathway                                              | 25       | 138       | 1.98E-02 |
| GnRH secretion                                                          | 16       | 49        | 2.04E-02 |
| Aldosterone synthesis and secretion                                     | 18       | 77        | 2.34E-02 |
| Natural killer cell mediated cytotoxicity                               | 20       | 74        | 2.55E-02 |
| Adrenergic signaling in cardiomyocytes                                  | 26       | 117       | 2.65E-02 |
| TNF signaling pathway                                                   | 26       | 104       | 2.71E-02 |
| EGFR tyrosine kinase inhibitor resistance                               | 18       | 77        | 2.75E-02 |
| Regulation of actin cytoskeleton                                        | 40       | 193       | 2.92E-02 |
| Hematopoietic cell lineage                                              | 17       | 57        | 3.82E-02 |
| Fluid shear stress and atherosclerosis                                  | 30       | 127       | 4.23E-02 |
| Wnt signaling pathway                                                   | 32       | 134       | 4.30E-02 |
| Endocrine and other factor-regulated calcium reabsorption               | 8        | 39        | 4.33E-02 |
| Metabolic pathways                                                      | 236      | 1212      | 4.36E-02 |
| Peroxisome                                                              | 21       | 76        | 4.39E-02 |
| Amoebiasis                                                              | 19       | 80        | 4.57E-02 |
| VEGF signaling pathway                                                  | 16       | 53        | 5.06E-02 |
| Melanoma                                                                | 16       | 63        | 5.08E-02 |
| B cell receptor signaling pathway                                       | 20       | 69        | 5.13E-02 |
| Pertussis                                                               | 12       | 63        | 5.35E-02 |
| Cushing syndrome                                                        | 33       | 132       | 6.44E-02 |
| Mucin type O-glycan biosynthesis                                        | 8        | 22        | 6.60E-02 |
| Fat digestion and absorption                                            | 8        | 22        | 6.60E-02 |
| Toll-like receptor signaling pathway                                    | 18       | 78        | 6.63E-02 |
| Pancreatic secretion                                                    | 15       | 59        | 6.67E-02 |
| Long-term depression                                                    | 13       | 47        | 7.59E-02 |
| Thyroid hormone synthesis                                               | 12       | 56        | 7.67E-02 |
| Fructose and mannose metabolism                                         | 10       | 31        | 7.70E-02 |
| Graft-versus-host disease                                               | 7        | 25        | 7.91E-02 |
| Arginine biosynthesis                                                   | 6        | 15        | 8.01E-02 |

|                                                            |    |     |          |
|------------------------------------------------------------|----|-----|----------|
| Apoptosis                                                  | 30 | 122 | 8.03E-02 |
| Ras signaling pathway                                      | 43 | 189 | 8.06E-02 |
| Protein digestion and absorption                           | 19 | 72  | 8.13E-02 |
| Necroptosis                                                | 28 | 117 | 8.36E-02 |
| Taste transduction                                         | 9  | 34  | 8.40E-02 |
| Neurotrophin signaling pathway                             | 24 | 110 | 8.40E-02 |
| Apelin signaling pathway                                   | 25 | 119 | 8.51E-02 |
| Antigen processing and presentation                        | 11 | 53  | 8.72E-02 |
| Influenza A                                                | 30 | 123 | 8.82E-02 |
| Hepatocellular carcinoma                                   | 32 | 152 | 8.97E-02 |
| Autoimmune thyroid disease                                 | 7  | 26  | 9.08E-02 |
| Phospholipase D signaling pathway                          | 29 | 120 | 9.53E-02 |
| Th1 and Th2 cell differentiation                           | 16 | 64  | 9.84E-02 |
| ABC transporters                                           | 11 | 37  | 1.01E-01 |
| Metabolism of xenobiotics by cytochrome P450               | 11 | 37  | 1.01E-01 |
| JAK-STAT signaling pathway                                 | 26 | 112 | 1.01E-01 |
| Pathways in cancer                                         | 92 | 453 | 1.02E-01 |
| Nicotinate and nicotinamide metabolism                     | 10 | 33  | 1.07E-01 |
| Ovarian steroidogenesis                                    | 8  | 31  | 1.09E-01 |
| Bile secretion                                             | 11 | 45  | 1.12E-01 |
| Osteoclast differentiation                                 | 25 | 108 | 1.16E-01 |
| C-type lectin receptor signaling pathway                   | 23 | 90  | 1.17E-01 |
| Insulin secretion                                          | 11 | 58  | 1.22E-01 |
| Inflammatory mediator regulation of TRP channels           | 20 | 81  | 1.23E-01 |
| Ether lipid metabolism                                     | 10 | 34  | 1.24E-01 |
| Hepatitis C                                                | 25 | 123 | 1.24E-01 |
| Cell adhesion molecules                                    | 23 | 96  | 1.26E-01 |
| Growth hormone synthesis, secretion and action             | 24 | 97  | 1.33E-01 |
| Kaposi sarcoma-associated herpesvirus infection            | 38 | 165 | 1.35E-01 |
| Salivary secretion                                         | 16 | 60  | 1.37E-01 |
| Transcriptional misregulation in cancer                    | 28 | 152 | 1.37E-01 |
| Drug metabolism - cytochrome P450                          | 10 | 35  | 1.43E-01 |
| Tuberculosis                                               | 32 | 140 | 1.45E-01 |
| Allograft rejection                                        | 6  | 26  | 1.46E-01 |
| Chemical carcinogenesis                                    | 11 | 40  | 1.50E-01 |
| Type II diabetes mellitus                                  | 9  | 34  | 1.52E-01 |
| Biosynthesis of amino acids                                | 16 | 64  | 1.54E-01 |
| Lysosome                                                   | 26 | 114 | 1.56E-01 |
| Type I diabetes mellitus                                   | 6  | 29  | 1.57E-01 |
| HIF-1 signaling pathway                                    | 22 | 97  | 1.62E-01 |
| alpha-Linolenic acid metabolism                            | 5  | 14  | 1.62E-01 |
| Rheumatoid arthritis                                       | 17 | 67  | 1.65E-01 |
| Human cytomegalovirus infection                            | 42 | 199 | 1.72E-01 |
| Yersinia infection                                         | 24 | 124 | 1.73E-01 |
| Alcoholism                                                 | 29 | 135 | 1.74E-01 |
| Mineral absorption                                         | 7  | 37  | 1.74E-01 |
| Chronic myeloid leukemia                                   | 16 | 75  | 1.77E-01 |
| Cholinergic synapse                                        | 19 | 90  | 1.79E-01 |
| T cell receptor signaling pathway                          | 19 | 80  | 1.87E-01 |
| Th17 cell differentiation                                  | 19 | 78  | 1.88E-01 |
| Alanine, aspartate and glutamate metabolism                | 8  | 28  | 1.89E-01 |
| Glucagon signaling pathway                                 | 11 | 84  | 1.94E-01 |
| Synaptic vesicle cycle                                     | 14 | 57  | 1.97E-01 |
| Proximal tubule bicarbonate reclamation                    | 5  | 15  | 1.98E-01 |
| Arachidonic acid metabolism                                | 10 | 38  | 2.04E-01 |
| Thiamine metabolism                                        | 4  | 11  | 2.05E-01 |
| Nitrogen metabolism                                        | 4  | 11  | 2.05E-01 |
| Glycosphingolipid biosynthesis - globo and isoglobo series | 4  | 11  | 2.05E-01 |
| PD-L1 expression and PD-1 checkpoint pathway in cancer     | 18 | 77  | 2.06E-01 |
| African trypanosomiasis                                    | 6  | 24  | 2.07E-01 |
| Circadian entrainment                                      | 18 | 76  | 2.10E-01 |
| Measles                                                    | 25 | 111 | 2.10E-01 |
| Glycerolipid metabolism                                    | 12 | 48  | 2.11E-01 |
| PPAR signaling pathway                                     | 12 | 60  | 2.13E-01 |
| Olfactory transduction                                     | 7  | 47  | 2.14E-01 |
| Aldosterone-regulated sodium reabsorption                  | 6  | 30  | 2.15E-01 |
| Fc gamma R-mediated phagocytosis                           | 21 | 88  | 2.19E-01 |
| Endometrial cancer                                         | 12 | 56  | 2.25E-01 |



|                                                     |    |     |          |
|-----------------------------------------------------|----|-----|----------|
| Insulin resistance                                  | 21 | 98  | 2.29E-01 |
| Proteasome                                          | 11 | 44  | 2.29E-01 |
| RIG-I-like receptor signaling pathway               | 9  | 48  | 2.29E-01 |
| Central carbon metabolism in cancer                 | 11 | 60  | 2.30E-01 |
| Choline metabolism in cancer                        | 16 | 85  | 2.31E-01 |
| Phagosome                                           | 27 | 126 | 2.34E-01 |
| IL-17 signaling pathway                             | 13 | 72  | 2.35E-01 |
| Acute myeloid leukemia                              | 13 | 61  | 2.41E-01 |
| Pancreatic cancer                                   | 13 | 75  | 2.47E-01 |
| Arginine and proline metabolism                     | 10 | 40  | 2.49E-01 |
| Small cell lung cancer                              | 17 | 89  | 2.50E-01 |
| Linoleic acid metabolism                            | 4  | 12  | 2.50E-01 |
| Collecting duct acid secretion                      | 6  | 21  | 2.51E-01 |
| Herpes simplex virus 1 infection                    | 74 | 377 | 2.59E-01 |
| Galactose metabolism                                | 7  | 26  | 2.61E-01 |
| Long-term potentiation                              | 12 | 56  | 2.62E-01 |
| Cholesterol metabolism                              | 7  | 37  | 2.64E-01 |
| Dilated cardiomyopathy                              | 14 | 75  | 2.65E-01 |
| Non-small cell lung cancer                          | 16 | 70  | 2.75E-01 |
| Purine metabolism                                   | 23 | 109 | 2.87E-01 |
| Human immunodeficiency virus 1 infection            | 32 | 179 | 2.90E-01 |
| Glycine, serine and threonine metabolism            | 8  | 32  | 2.94E-01 |
| Glutamatergic synapse                               | 17 | 82  | 2.95E-01 |
| FoxO signaling pathway                              | 21 | 113 | 2.95E-01 |
| Hepatitis B                                         | 26 | 141 | 2.96E-01 |
| Basal cell carcinoma                                | 12 | 50  | 2.96E-01 |
| p53 signaling pathway                               | 15 | 68  | 3.06E-01 |
| Oocyte meiosis                                      | 10 | 105 | 3.11E-01 |
| Glycerophospholipid metabolism                      | 17 | 79  | 3.13E-01 |
| Primary immunodeficiency                            | 6  | 23  | 3.18E-01 |
| Ubiquinone and other terpenoid-quinone biosynthesis | 3  | 9   | 3.18E-01 |
| Viral myocarditis                                   | 12 | 52  | 3.21E-01 |
| Prolactin signaling pathway                         | 13 | 54  | 3.27E-01 |
| Colorectal cancer                                   | 15 | 82  | 3.28E-01 |
| Glioma                                              | 15 | 69  | 3.29E-01 |
| Platinum drug resistance                            | 15 | 69  | 3.31E-01 |
| Hippo signaling pathway                             | 28 | 134 | 3.37E-01 |
| Ferroptosis                                         | 6  | 36  | 3.53E-01 |
| AMPK signaling pathway                              | 11 | 108 | 3.53E-01 |
| mRNA surveillance pathway                           | 10 | 91  | 3.55E-01 |
| Longevity regulating pathway - multiple species     | 6  | 58  | 3.57E-01 |
| Dopaminergic synapse                                | 18 | 110 | 3.70E-01 |
| Inflammatory bowel disease                          | 10 | 41  | 3.84E-01 |
| Leishmaniasis                                       | 13 | 59  | 3.86E-01 |
| NOD-like receptor signaling pathway                 | 26 | 143 | 3.93E-01 |
| Various types of N-glycan biosynthesis              | 8  | 36  | 4.03E-01 |
| mTOR signaling pathway                              | 25 | 140 | 4.03E-01 |
| Regulation of lipolysis in adipocytes               | 10 | 47  | 4.04E-01 |
| Longevity regulating pathway                        | 7  | 83  | 4.05E-01 |
| Biosynthesis of unsaturated fatty acids             | 6  | 26  | 4.15E-01 |
| Progesterone-mediated oocyte maturation             | 11 | 80  | 4.16E-01 |
| Nicotine addiction                                  | 5  | 21  | 4.20E-01 |
| Primary bile acid biosynthesis                      | 3  | 11  | 4.23E-01 |
| Sulfur metabolism                                   | 3  | 11  | 4.23E-01 |
| Other glycan degradation                            | 4  | 16  | 4.24E-01 |
| 2-Oxocarboxylic acid metabolism                     | 4  | 16  | 4.24E-01 |
| Salmonella infection                                | 38 | 232 | 4.24E-01 |
| Glutathione metabolism                              | 11 | 53  | 4.27E-01 |
| Melanogenesis                                       | 17 | 81  | 4.29E-01 |
| Other types of O-glycan biosynthesis                | 8  | 37  | 4.29E-01 |
| Gastric acid secretion                              | 11 | 52  | 4.31E-01 |
| Oxytocin signaling pathway                          | 25 | 121 | 4.32E-01 |
| Protein processing in endoplasmic reticulum         | 29 | 159 | 4.38E-01 |
| Breast cancer                                       | 24 | 122 | 4.42E-01 |
| RNA transport                                       | 11 | 157 | 4.44E-01 |
| Bladder cancer                                      | 9  | 38  | 4.44E-01 |
| Drug metabolism - other enzymes                     | 11 | 54  | 4.49E-01 |
| Gap junction                                        | 16 | 74  | 4.53E-01 |

|                                                  |    |     |             |
|--------------------------------------------------|----|-----|-------------|
| Steroid hormone biosynthesis                     | 5  | 22  | 4.54E-01    |
| Cell cycle                                       | 11 | 118 | 4.59E-01    |
| Vitamin digestion and absorption                 | 4  | 17  | 4.63E-01    |
| Estrogen signaling pathway                       | 17 | 98  | 4.65E-01    |
| Apoptosis - multiple species                     | 5  | 29  | 4.67E-01    |
| TGF-beta signaling pathway                       | 15 | 80  | 4.77E-01    |
| Serotonergic synapse                             | 17 | 79  | 4.80E-01    |
| beta-Alanine metabolism                          | 5  | 23  | 4.87E-01    |
| cAMP signaling pathway                           | 30 | 151 | 4.87E-01    |
| Fanconi anemia pathway                           | 2  | 51  | 4.91E-01    |
| Hypertrophic cardiomyopathy                      | 14 | 73  | 4.95E-01    |
| Cocaine addiction                                | 6  | 37  | 4.99E-01    |
| Histidine metabolism                             | 4  | 18  | 5.00E-01    |
| Sphingolipid signaling pathway                   | 21 | 112 | 0.50334883  |
| Glycosphingolipid biosynthesis - ganglio series  | 3  | 13  | 0.513760332 |
| Cytosolic DNA-sensing pathway                    | 9  | 44  | 0.515452332 |
| Retrograde endocannabinoid signaling             | 19 | 109 | 0.517662441 |
| Carbon metabolism                                | 19 | 103 | 0.52297149  |
| Viral carcinogenesis                             | 35 | 183 | 0.5233854   |
| Sphingolipid metabolism                          | 8  | 41  | 0.52590988  |
| GnRH signaling pathway                           | 16 | 76  | 0.527869285 |
| ErbB signaling pathway                           | 16 | 78  | 0.528103549 |
| Amphetamine addiction                            | 9  | 56  | 0.5337822   |
| Notch signaling pathway                          | 7  | 48  | 0.538032535 |
| Fc epsilon RI signaling pathway                  | 12 | 56  | 0.538173596 |
| Valine, leucine and isoleucine degradation       | 9  | 48  | 0.554278519 |
| SNARE interactions in vesicular transport        | 7  | 32  | 0.55721241  |
| GABAergic synapse                                | 11 | 60  | 0.57171058  |
| Protein export                                   | 5  | 26  | 0.573477971 |
| Circadian rhythm                                 | 3  | 30  | 0.574241812 |
| NF-kappa B signaling pathway                     | 17 | 88  | 0.574800927 |
| Intestinal immune network for IgA production     | 6  | 29  | 0.59054908  |
| Mannose type O-glycan biosynthesis               | 4  | 21  | 0.594111175 |
| Tight junction                                   | 26 | 134 | 0.604858113 |
| Human T-cell leukemia virus 1 infection          | 34 | 199 | 0.608997489 |
| Valine, leucine and isoleucine biosynthesis      | 1  | 4   | 0.615962428 |
| D-Glutamine and D-glutamate metabolism           | 1  | 4   | 0.615962428 |
| Biosynthesis of cofactors                        | 21 | 122 | 0.615989648 |
| Phenylalanine metabolism                         | 2  | 10  | 0.618096059 |
| Selenocompound metabolism                        | 3  | 16  | 0.619287322 |
| Arrhythmogenic right ventricular cardiomyopathy  | 12 | 59  | 0.630161927 |
| N-Glycan biosynthesis                            | 8  | 47  | 0.641891323 |
| Endocrine resistance                             | 15 | 85  | 0.645447986 |
| Renin-angiotensin system                         | 3  | 17  | 0.64714842  |
| Parkinson disease                                | 31 | 211 | 0.663192659 |
| Pentose phosphate pathway                        | 4  | 24  | 0.666194401 |
| Fatty acid elongation                            | 4  | 24  | 0.666194401 |
| Prostate cancer                                  | 15 | 91  | 0.666611157 |
| Steroid biosynthesis                             | 3  | 18  | 0.671818728 |
| Glycolysis / Gluconeogenesis                     | 8  | 49  | 0.672308042 |
| Maturity onset diabetes of the young             | 2  | 7   | 0.676593999 |
| Glycosaminoglycan biosynthesis - keratan sulfate | 2  | 12  | 0.681870464 |
| Ascorbate and aldarate metabolism                | 2  | 12  | 0.681870464 |
| Legionellosis                                    | 9  | 54  | 0.682505397 |
| Renal cell carcinoma                             | 13 | 67  | 0.685712318 |
| Inositol phosphate metabolism                    | 11 | 69  | 0.692083133 |
| Thermogenesis                                    | 20 | 201 | 0.702311853 |
| Hippo signaling pathway - multiple species       | 2  | 25  | 0.702329609 |
| Phosphonate and phosphinate metabolism           | 1  | 6   | 0.704802913 |
| Taurine and hypotaurine metabolism               | 1  | 6   | 0.704802913 |
| Spinocerebellar ataxia                           | 22 | 125 | 0.708789398 |
| Tyrosine metabolism                              | 3  | 20  | 0.712783297 |
| Lysine degradation                               | 9  | 59  | 0.718443478 |
| Basal transcription factors                      | 6  | 40  | 0.71948612  |
| Thyroid hormone signaling pathway                | 19 | 110 | 0.72516976  |
| Alzheimer disease                                | 56 | 312 | 0.729695175 |
| Cysteine and methionine metabolism               | 6  | 41  | 0.731393977 |
| Antifolate resistance                            | 5  | 27  | 0.732991229 |

|                                                            |    |     |             |
|------------------------------------------------------------|----|-----|-------------|
| Glyoxylate and dicarboxylate metabolism                    | 4  | 28  | 0.73351353  |
| Vitamin B6 metabolism                                      | 1  | 7   | 0.73377489  |
| Phosphatidylinositol signaling system                      | 13 | 87  | 0.74211709  |
| Adherens junction                                          | 10 | 68  | 0.742912423 |
| Relaxin signaling pathway                                  | 21 | 113 | 0.743828478 |
| Hedgehog signaling pathway                                 | 3  | 43  | 0.744392798 |
| Terpenoid backbone biosynthesis                            | 3  | 22  | 0.744456943 |
| Fatty acid biosynthesis                                    | 2  | 15  | 0.745504094 |
| Pyrimidine metabolism                                      | 7  | 49  | 0.746586734 |
| Adipocytokine signaling pathway                            | 8  | 60  | 0.751053512 |
| Riboflavin metabolism                                      | 1  | 8   | 0.756180045 |
| Starch and sucrose metabolism                              | 3  | 23  | 0.757441598 |
| Parathyroid hormone synthesis, secretion and action        | 16 | 87  | 0.759038569 |
| Glycosaminoglycan degradation                              | 2  | 16  | 0.760609414 |
| Pantothenate and CoA biosynthesis                          | 2  | 16  | 0.760609414 |
| Cardiac muscle contraction                                 | 8  | 59  | 0.773395224 |
| Propanoate metabolism                                      | 4  | 32  | 0.776779713 |
| Tryptophan metabolism                                      | 4  | 32  | 0.776779713 |
| Amino sugar and nucleotide sugar metabolism                | 6  | 46  | 0.777157859 |
| Pathways of neurodegeneration - multiple diseases          | 67 | 401 | 0.78181575  |
| Autophagy - animal                                         | 13 | 130 | 0.78694348  |
| Synthesis and degradation of ketone bodies                 | 1  | 10  | 0.78756298  |
| Asthma                                                     | 1  | 10  | 0.78756298  |
| Toxoplasmosis                                              | 17 | 95  | 0.789414498 |
| Thyroid cancer                                             | 6  | 33  | 0.789648922 |
| Fatty acid degradation                                     | 5  | 41  | 0.790608314 |
| Carbohydrate digestion and absorption                      | 6  | 31  | 0.791585608 |
| One carbon pool by folate                                  | 2  | 19  | 0.793564147 |
| Porphyrin and chlorophyll metabolism                       | 3  | 27  | 0.795111111 |
| Glycosaminoglycan biosynthesis - heparan sulfate / heparin | 2  | 20  | 0.801432078 |
| Butanoate metabolism                                       | 2  | 20  | 0.801432078 |
| Non-homologous end-joining                                 | 1  | 12  | 0.807436121 |
| Phototransduction                                          | 1  | 15  | 0.813251397 |
| Cellular senescence                                        | 26 | 153 | 0.819716516 |
| Fatty acid metabolism                                      | 6  | 56  | 0.822917229 |
| Endocytosis                                                | 32 | 234 | 0.823680514 |
| Pyruvate metabolism                                        | 3  | 33  | 0.824353428 |
| RNA degradation                                            | 12 | 76  | 0.825776185 |
| Insulin signaling pathway                                  | 17 | 120 | 0.827796048 |
| Citrate cycle (TCA cycle)                                  | 2  | 28  | 0.8341111   |
| RNA polymerase                                             | 2  | 29  | 0.835974377 |
| Oxidative phosphorylation                                  | 12 | 110 | 0.837588506 |
| Aminoacyl-tRNA biosynthesis                                | 3  | 44  | 0.842077372 |
| Glycosylphosphatidylinositol (GPI)-anchor biosynthesis     | 1  | 25  | 0.843410015 |
| Nucleotide excision repair                                 | 2  | 43  | 0.845521407 |
| Base excision repair                                       | 1  | 33  | 0.845875907 |
| DNA replication                                            | 1  | 35  | 0.846095149 |
| Ubiquitin mediated proteolysis                             | 11 | 136 | 0.846323302 |
| Ribosome biogenesis in eukaryotes                          | 4  | 78  | 0.846454627 |
| Ribosome                                                   | 8  | 136 | 0.84656547  |
| Spliceosome                                                | 3  | 129 | 0.846573587 |
| Morphine addiction                                         | 11 | 64  | 0.874247843 |
| Mitophagy - animal                                         | 9  | 64  | 0.895453392 |
| Non-alcoholic fatty liver disease                          | 19 | 132 | 0.960369892 |
| Vasopressin-regulated water reabsorption                   | 4  | 37  | 0.967690304 |
| Autophagy - other                                          | 1  | 31  | 0.97966484  |
| Amyotrophic lateral sclerosis                              | 35 | 314 | 0.989271414 |
| Huntington disease                                         | 32 | 260 | 0.998463506 |

**Supp. Table S3: Differentially expressed receptors.** This list includes integrins. The q-value cut off is 0.05, upregulated receptors have a log2FC above 0.6 (red), and downregulated receptors have a log2FC below -0.6 (blue).

| SYMBOL       | GENENAME                                                            | log2FC       | q-value     |
|--------------|---------------------------------------------------------------------|--------------|-------------|
| Adcyap1r1    | adenylate cyclase activating polypeptide 1 receptor 1               | -4.981068202 | 1.00E-06    |
| Adora2b      | adenosine A2b receptor                                              | -1.143494105 | 1.00E-06    |
| Antxr1       | anthrax toxin receptor-like                                         | 4.553982293  | 1.00E-06    |
| Cxadr        | coxsackie virus and adenovirus receptor                             | 3.058938096  | 1.00E-06    |
| Epha1        | Eph receptor A1                                                     | 1.431393709  | 1.00E-06    |
| Fas          | Fas (TNF receptor superfamily member 6)                             | -1.618621567 | 1.00E-06    |
| Flvcr2       | feline leukemia virus subgroup C cellular receptor 2                | 2.739375597  | 1.00E-06    |
| Fzd6         | frizzled class receptor 6                                           | 1.320089949  | 1.00E-06    |
| Gab1         | growth factor receptor bound protein 2-associated protein 1         | 1.603900206  | 1.00E-06    |
| Grip1        | glutamate receptor interacting protein 1                            | 6.172341174  | 1.00E-06    |
| Grk5         | G protein-coupled receptor kinase 5                                 | -1.421961981 | 1.00E-06    |
| Mchr1        | melanin-concentrating hormone receptor 1                            | 3.739767803  | 1.00E-06    |
| Mrap         | melanocortin 2 receptor accessory protein                           | 2.324639509  | 1.00E-06    |
| Npr3         | natriuretic peptide receptor 3                                      | -2.32993028  | 1.00E-06    |
| Olfr1372-ps1 | olfactory receptor 1372, pseudogene 1                               | 2.657294779  | 1.00E-06    |
| Ptger3       | prostaglandin E receptor 3 (subtype EP3)                            | 3.903749436  | 1.00E-06    |
| Ptpu         | protein tyrosine phosphatase, receptor type, U                      | 4.472800433  | 1.00E-06    |
| Rapsn        | receptor-associated protein of the synapse                          | -3.798857496 | 1.00E-06    |
| Rtn4rl2      | reticulon 4 receptor-like 2                                         | 1.622597289  | 1.00E-06    |
| Ryr3         | ryanodine receptor 3                                                | 4.122199731  | 1.00E-06    |
| Sorl1        | sortilin-related receptor, LDLR class A repeats-containing          | 3.154360143  | 1.00E-06    |
| Trbc2        | T cell receptor beta, constant 2                                    | 4.14325321   | 1.00E-06    |
| Scarf2       | scavenger receptor class F, member 2                                | 1.347157193  | 2.33E-06    |
| Nr5a2        | nuclear receptor subfamily 5, group A, member 2                     | 4.349592675  | 4.44E-06    |
| Adrb2        | adrenergic receptor, beta 2                                         | -1.412086564 | 4.60E-06    |
| Gpr85        | G protein-coupled receptor 85                                       | -2.298353529 | 7.01E-06    |
| Eps15l1      | epidermal growth factor receptor pathway substrate 15-like 1        | 0.881529861  | 7.90E-06    |
| Tnfrsf12a    | tumor necrosis factor receptor superfamily, member 12a              | -1.107658963 | 8.74E-06    |
| Trpm5        | transient receptor potential cation channel, subfamily M, member 5  | -3.131523437 | 9.66E-06    |
| Itga3        | integrin alpha 3                                                    | 1.703551417  | 1.07E-05    |
| Pvr          | poliovirus receptor                                                 | -0.989641864 | 1.74E-05    |
| Htr2a        | 5-hydroxytryptamine (serotonin) receptor 2A                         | -2.001585663 | 1.94E-05    |
| Chrna4       | cholinergic receptor, nicotinic, alpha polypeptide 4                | 2.719951081  | 2.10E-05    |
| Ripk2        | receptor (TNFRSF)-interacting serine-threonine kinase 2             | -1.498581008 | 2.19E-05    |
| Epha3        | Eph receptor A3                                                     | -6.405623883 | 3.39E-05    |
| Itga2        | integrin alpha 2                                                    | -3.903032556 | 3.70E-05    |
| Rarres1      | retinoic acid receptor responder (tazarotene induced) 1             | -2.861882552 | 4.76E-05    |
| Tnfrsf9      | tumor necrosis factor receptor superfamily, member 9                | -6.609201441 | 5.12E-05    |
| Celsr2       | cadherin, EGF LAG seven-pass G-type receptor 2                      | 1.812102398  | 6.90E-05    |
| Lpar2        | lysophosphatidic acid receptor 2                                    | 2.062966232  | 8.29E-05    |
| Il2rg        | interleukin 2 receptor, gamma chain                                 | -3.272564154 | 8.64E-05    |
| Prokr1       | prokineticin receptor 1                                             | 2.445102116  | 9.12E-05    |
| Ramp1        | receptor (calcitonin) activity modifying protein 1                  | 3.095853192  | 9.12E-05    |
| Bmpr1b       | bone morphogenetic protein receptor, type 1B                        | -1.622418046 | 9.85E-05    |
| Scara3       | scavenger receptor class A, member 3                                | -1.910149969 | 0.000116458 |
| Gfra4        | glial cell line derived neurotrophic factor family receptor alpha 4 | -1.312821088 | 0.000128891 |
| Mst1r        | macrophage stimulating 1 receptor (c-met-related tyrosine kinase)   | 1.703643588  | 0.000190689 |
| Adgr1        | adhesion G protein-coupled receptor L1                              | 1.148051324  | 0.000191437 |
| Ifngr2       | interferon gamma receptor 2                                         | -0.937548642 | 0.000193008 |
| Klra4        | killer cell lectin-like receptor, subfamily A, member 4             | -3.303926908 | 0.000193468 |
| Acvrl1       | activin A receptor, type II-like 1                                  | -2.438245346 | 0.000206663 |
| Epor         | erythropoietin receptor                                             | 2.472378962  | 0.000219768 |
| P2rx7        | purinergic receptor P2X, ligand-gated ion channel, 7                | -3.386467426 | 0.000235385 |
| Unc5c        | unc-5 netrin receptor C                                             | -4.408562779 | 0.00023558  |
| Il1rap       | interleukin 1 receptor accessory protein                            | 0.974563503  | 0.000236399 |
| Epha7        | Eph receptor A7                                                     | 1.611522818  | 0.000240603 |
| Adra1b       | adrenergic receptor, alpha 1b                                       | -1.66521395  | 0.000242203 |
| Klra2        | killer cell lectin-like receptor, subfamily A, member 2             | -1.444232871 | 0.000303913 |
| Crif3        | cytokine receptor-like factor 3                                     | -0.699768697 | 0.000343965 |
| Fzd4         | frizzled class receptor 4                                           | 1.52505821   | 0.00050876  |
| Tgfb3        | transforming growth factor, beta receptor III                       | 1.084009579  | 0.000515581 |
| Bdkrb2       | bradykinin receptor, beta 2                                         | -5.229756717 | 0.000577267 |
| Gpr137c      | G protein-coupled receptor 137C                                     | -3.694886563 | 0.000615662 |
| Grb14        | growth factor receptor bound protein 14                             | 1.005482645  | 0.000673997 |

|          |                                                                                |              |             |
|----------|--------------------------------------------------------------------------------|--------------|-------------|
| Crif1    | cytokine receptor-like factor 1                                                | -2.769830959 | 0.000762905 |
| Lrp11    | low density lipoprotein receptor-related protein 11                            | -1.410684115 | 0.000805311 |
| P2ry6    | pyrimidinergic receptor P2Y, G-protein coupled, 6                              | -2.723327675 | 0.000870242 |
| Pirb     | paired Ig-like receptor B                                                      | -3.133180864 | 0.00090352  |
| Pgrmc1   | progesterone receptor membrane component 1                                     | -0.887795143 | 0.001081619 |
| Ogfr1    | opioid growth factor receptor-like 1                                           | -1.160937425 | 0.001106534 |
| Nr2f2    | nuclear receptor subfamily 2, group F, member 2                                | -0.841745184 | 0.001208425 |
| Rtp4     | receptor transporter protein 4                                                 | -3.288655889 | 0.001365915 |
| Gprc5b   | G protein-coupled receptor, family C, group 5, member B                        | -1.699728614 | 0.001385115 |
| Vmn2r79  | vomeroneasal 2, receptor 79                                                    | -6.806011554 | 0.001434523 |
| Adra1d   | adrenergic receptor, alpha 1d                                                  | -1.927779763 | 0.001550362 |
| Trpc4    | transient receptor potential cation channel, subfamily C, member 4             | 3.902153569  | 0.001716242 |
| Pdgfrb   | platelet derived growth factor receptor, beta polypeptide                      | -0.969158974 | 0.001732918 |
| S1pr1    | sphingosine-1-phosphate receptor 1                                             | -1.433812634 | 0.001812412 |
| Ntrk2    | neurotrophic tyrosine kinase, receptor, type 2                                 | 5.213863699  | 0.001824005 |
| Tgfb3l1  | transforming growth factor, beta receptor III-like                             | 2.232581073  | 0.001914332 |
| Eps8     | epidermal growth factor receptor pathway substrate 8                           | 1.000095684  | 0.001917335 |
| Il10rb   | interleukin 10 receptor, beta                                                  | -0.929195028 | 0.002004122 |
| P2ry2    | purinergic receptor P2Y, G-protein coupled 2                                   | -1.447311673 | 0.002004122 |
| Vdr      | vitamin D (1,25-dihydroxyvitamin D3) receptor                                  | 1.431877441  | 0.002038051 |
| Reep5    | receptor accessory protein 5                                                   | -1.357440975 | 0.002222368 |
| Gpr165   | G protein-coupled receptor 165                                                 | -3.974043637 | 0.002444543 |
| Ssr1     | signal sequence receptor, alpha                                                | -0.69451409  | 0.002481872 |
| Plaur    | plasminogen activator, urokinase receptor                                      | -1.146292459 | 0.002508939 |
| Gprasp2  | G protein-coupled receptor associated sorting protein 2                        | 2.99971014   | 0.002661486 |
| Rer1     | retention in endoplasmic reticulum sorting receptor 1                          | -0.874968363 | 0.002720388 |
| Acvr1b   | activin A receptor, type 1B                                                    | 0.887406272  | 0.002751096 |
| Itga2b   | integrin alpha 2b                                                              | 1.231993598  | 0.002903529 |
| Edar     | ectodysplasin-A receptor                                                       | -4.856381745 | 0.002977391 |
| Gpr135   | G protein-coupled receptor 135                                                 | -1.018376989 | 0.00310932  |
| Adgrf4   | adhesion G protein-coupled receptor F4                                         | 2.275896867  | 0.003267834 |
| Traf1    | TNF receptor-associated factor 1                                               | -3.575206524 | 0.003690393 |
| Arnt     | aryl hydrocarbon receptor nuclear translocator                                 | 0.687346542  | 0.003847273 |
| Spsb1    | splA/ryanodine receptor domain and SOCS box containing 1                       | -0.963489345 | 0.004131773 |
| Grin2a   | glutamate receptor, ionotropic, NMDA2A (epsilon 1)                             | -5.086199303 | 0.004452627 |
| Xcr1     | chemokine (C motif) receptor 1                                                 | 2.12258558   | 0.004820252 |
| Ntrk3    | neurotrophic tyrosine kinase, receptor, type 3                                 | 1.978504674  | 0.004890327 |
| Ackr4    | atypical chemokine receptor 4                                                  | 2.062788397  | 0.005106014 |
| Ptpn13   | protein tyrosine phosphatase, non-receptor type 13                             | 0.934090188  | 0.005140595 |
| Adgrg6   | adhesion G protein-coupled receptor G6                                         | -2.065976869 | 0.005417267 |
| Ifnlr1   | interferon lambda receptor 1                                                   | 1.743105027  | 0.005546553 |
| Itpr3    | inositol 1,4,5-trisphosphate receptor 3                                        | 1.132773891  | 0.005751373 |
| Olfir544 | olfactory receptor 544                                                         | 4.513201245  | 0.005845066 |
| Adgrl3   | adhesion G protein-coupled receptor L3                                         | -6.041766416 | 0.005961472 |
| Itpril2  | inositol 1,4,5-trisphosphate receptor interacting protein-like 2               | -1.25916198  | 0.006511008 |
| Kdelr3   | KDEL (Lys-Asp-Glu-Leu) endoplasmic reticulum protein retention receptor 3      | -1.08106013  | 0.007195823 |
| Fcrls    | Fc receptor-like S, scavenger receptor                                         | -5.563031959 | 0.007611407 |
| Lilra5   | leukocyte immunoglobulin-like receptor, subfamily A (with TM domain), member 5 | -5.197910332 | 0.007679915 |
| Fpr1     | formyl peptide receptor 1                                                      | -5.713381945 | 0.007961185 |
| Cnr2     | cannabinoid receptor 2 (macrophage)                                            | -3.299545761 | 0.00814392  |
| Il21r    | interleukin 21 receptor                                                        | -4.267622036 | 0.008279783 |
| Gpr180   | G protein-coupled receptor 180                                                 | -0.901369202 | 0.008390694 |
| Tlr7     | toll-like receptor 7                                                           | -2.44123678  | 0.008624683 |
| Kiss1r   | KISS1 receptor                                                                 | 1.41537032   | 0.008626151 |
| Ager     | advanced glycosylation end product-specific receptor                           | 1.277154842  | 0.008834422 |
| Cnrip1   | cannabinoid receptor interacting protein 1                                     | -0.928300812 | 0.009471894 |
| Itga7    | integrin alpha 7                                                               | -2.184701543 | 0.009923419 |
| Ppargc1b | peroxisome proliferative activated receptor, gamma, coactivator 1 beta         | 1.484112637  | 0.010020738 |
| Sigmar1  | sigma non-opioid intracellular receptor 1                                      | -0.685189321 | 0.010777312 |
| C3ar1    | complement component 3a receptor 1                                             | -2.601385362 | 0.010899396 |
| Liril1   | ligand dependent nuclear receptor interacting factor 1                         | -0.604952911 | 0.012316941 |
| Gria4    | glutamate receptor, ionotropic, AMPA4 (alpha 4)                                | -1.792468103 | 0.012583308 |
| CSar1    | complement component 5a receptor 1                                             | -2.763755896 | 0.012685318 |
| Pira2    | paired-Ig-like receptor A2                                                     | -3.154658878 | 0.013267912 |
| Cxcr6    | chemokine (C-X-C motif) receptor 6                                             | 2.795035075  | 0.014375622 |
| Hrh1     | histamine receptor H1                                                          | -2.056848309 | 0.014977761 |
| Itgb6    | integrin beta 6                                                                | -5.002543557 | 0.015383342 |
| Robo1    | roundabout guidance receptor 1                                                 | -1.893251121 | 0.015409193 |

|           |                                                                                                           |              |             |
|-----------|-----------------------------------------------------------------------------------------------------------|--------------|-------------|
| Pgrmc2    | progesterone receptor membrane component 2                                                                | -1.244303881 | 0.015454609 |
| Ldlr      | low density lipoprotein receptor                                                                          | -0.688146759 | 0.016238679 |
| ErbB3     | erb-b2 receptor tyrosine kinase 3                                                                         | 1.68425629   | 0.016399723 |
| Nr2c1     | nuclear receptor subfamily 2, group C, member 1                                                           | 0.766537569  | 0.016544777 |
| Itgb5     | integrin beta 5                                                                                           | -0.836745649 | 0.017543718 |
| Tshr      | thyroid stimulating hormone receptor                                                                      | -4.101223713 | 0.017897015 |
| Itga8     | integrin alpha 8                                                                                          | -4.390664624 | 0.018391085 |
| Cnih1     | cornichon family AMPA receptor auxiliary protein 1                                                        | -0.846979031 | 0.018426414 |
| Ackr1     | atypical chemokine receptor 1 (Duffy blood group)                                                         | 3.107178744  | 0.018534383 |
| Nr6a1     | nuclear receptor subfamily 6, group A, member 1                                                           | 0.95248023   | 0.018697809 |
| Il17re    | interleukin 17 receptor E                                                                                 | -1.381271963 | 0.018730702 |
| Ptpre     | protein tyrosine phosphatase, receptor type, E                                                            | -2.460186621 | 0.018851297 |
| Adgrb2    | adhesion G protein-coupled receptor B2                                                                    | 1.48954952   | 0.019291649 |
| Ptprc     | protein tyrosine phosphatase, receptor type, C                                                            | -2.65070343  | 0.019573316 |
| Grb10     | growth factor receptor bound protein 10                                                                   | -2.166274849 | 0.019850396 |
| Ppargc1a  | peroxisome proliferative activated receptor, gamma, coactivator 1 alpha                                   | 1.903253455  | 0.020206455 |
| Nsd3      | nuclear receptor binding SET domain protein 3                                                             | 0.735360564  | 0.020862448 |
| Il1rl2    | interleukin 1 receptor-like 2                                                                             | -1.400647326 | 0.021303627 |
| Olfr1318  | olfactory receptor 1318                                                                                   | -2.377088663 | 0.022795666 |
| Hcar2     | hydroxycarboxylic acid receptor 2                                                                         | -4.983924691 | 0.022967236 |
| Ptpn7     | protein tyrosine phosphatase, non-receptor type 7                                                         | -2.058032111 | 0.022992673 |
| Nr4a3     | nuclear receptor subfamily 4, group A, member 3                                                           | -2.039174747 | 0.024356579 |
| Grin3a    | glutamate receptor ionotropic, NMDA3A                                                                     | -2.968507667 | 0.024426669 |
| Scara5    | scavenger receptor class A, member 5                                                                      | 1.803201045  | 0.02466061  |
| Il10ra    | interleukin 10 receptor, alpha                                                                            | -3.126789697 | 0.02474089  |
| Agtr1b    | angiotensin II receptor, type 1b                                                                          | -5.445510886 | 0.025131599 |
| Ephb6     | Eph receptor B6                                                                                           | 2.163192886  | 0.025295198 |
| Ppfia1    | protein tyrosine phosphatase, receptor type, f polypeptide (PTPRF), interacting protein (liprin), alpha 1 | -0.672617235 | 0.025440355 |
| Gprc5a    | G protein-coupled receptor, family C, group 5, member A                                                   | -0.922153332 | 0.025461532 |
| Havcr2    | hepatitis A virus cellular receptor 2                                                                     | -2.267908736 | 0.026549551 |
| Thrb      | thyroid hormone receptor beta                                                                             | 1.46607512   | 0.026732329 |
| Il1rl1    | interleukin 1 receptor-like 1                                                                             | -3.433513808 | 0.027764161 |
| Rorb      | RAR-related orphan receptor beta                                                                          | -4.201601713 | 0.028099157 |
| Vmn1r40   | vomerionasal 1 receptor 40                                                                                | -3.352125896 | 0.028168037 |
| Il1rn     | interleukin 1 receptor antagonist                                                                         | -2.59126267  | 0.029899139 |
| Olfr1309  | olfactory receptor 1309                                                                                   | -4.956325924 | 0.032219042 |
| Trem2     | triggering receptor expressed on myeloid cells 2                                                          | -2.054324022 | 0.033082263 |
| Cxcr4     | chemokine (C-X-C motif) receptor 4                                                                        | -3.022864117 | 0.033534976 |
| Fcgr2b    | Fc receptor, IgG, low affinity IIb                                                                        | -3.288260742 | 0.033827062 |
| Nrip1     | nuclear receptor interacting protein 1                                                                    | 0.820618997  | 0.0345886   |
| Gprasp1   | G protein-coupled receptor associated sorting protein 1                                                   | 0.817444898  | 0.035995445 |
| Ptgfr     | prostaglandin F receptor                                                                                  | -2.328310133 | 0.036614773 |
| Prokr2    | prokineticin receptor 2                                                                                   | 3.91406515   | 0.037460734 |
| Gabbr1    | gamma-aminobutyric acid (GABA) B receptor, 1                                                              | 0.621794363  | 0.038454491 |
| F11r      | F11 receptor                                                                                              | 1.107362264  | 0.039209426 |
| Ptpnz1    | protein tyrosine phosphatase, receptor type Z, polypeptide 1                                              | 2.356457652  | 0.039241823 |
| Tlr8      | toll-like receptor 8                                                                                      | -2.534205244 | 0.039878038 |
| Ephb3     | Eph receptor B3                                                                                           | 0.699232745  | 0.041107959 |
| Gpr153    | G protein-coupled receptor 153                                                                            | 1.200780848  | 0.041503438 |
| Gfra2     | glial cell line derived neurotrophic factor family receptor alpha 2                                       | -3.829831431 | 0.042030726 |
| Gpr65     | G-protein coupled receptor 65                                                                             | -3.301269949 | 0.042496779 |
| Adgrg1    | adhesion G protein-coupled receptor G1                                                                    | -1.267511692 | 0.042875143 |
| Olrl      | oxidized low density lipoprotein (lectin-like) receptor 1                                                 | -0.810907472 | 0.043486146 |
| Il20ra    | interleukin 20 receptor, alpha                                                                            | 1.755415421  | 0.044353559 |
| Vmn1r43   | vomerionasal 1 receptor 43                                                                                | -2.019639714 | 0.044353559 |
| Ptgfrn    | prostaglandin F2 receptor negative regulator                                                              | -0.732124459 | 0.044384452 |
| Tnfrsf10b | tumor necrosis factor receptor superfamily, member 10b                                                    | -0.716175309 | 0.045685537 |
| Nmur1     | neuromedin U receptor 1                                                                                   | -3.44896536  | 0.046082901 |
| Il12rb1   | interleukin 12 receptor, beta 1                                                                           | 1.417690589  | 0.046818201 |
| Ror1      | receptor tyrosine kinase-like orphan receptor 1                                                           | -1.316108967 | 0.047074476 |
| Cd200r1   | CD200 receptor 1                                                                                          | -2.642809096 | 0.047221801 |
| Ptpro     | protein tyrosine phosphatase, receptor type, O                                                            | -2.640031292 | 0.048901104 |
| Nr4a2     | nuclear receptor subfamily 4, group A, member 2                                                           | -0.822435128 | 0.04892871  |
| Nr1d1     | nuclear receptor subfamily 1, group D, member 1                                                           | -0.895513016 | 0.049252075 |
| P2ry14    | purinergic receptor P2Y, G-protein coupled, 14                                                            | -5.785003834 | 0.049410283 |
| Fcgr3     | Fc receptor, IgG, low affinity III                                                                        | -3.070589392 | 0.049423005 |
| Olfr99    | olfactory receptor 99                                                                                     | 2.674202537  | 0.04995561  |

Supp. Table 4: ToppFun output for differentially expressed receptor molecular function terms are shown here.

| Name                                                         | p-value  | Hit Count in Query List | Hit Count in Genome | Hit in Query List                                                                                                                                                                                                                                                                                                                                                                                                                                                                                                                                                                                                                                                                                                                                                                                                                         |
|--------------------------------------------------------------|----------|-------------------------|---------------------|-------------------------------------------------------------------------------------------------------------------------------------------------------------------------------------------------------------------------------------------------------------------------------------------------------------------------------------------------------------------------------------------------------------------------------------------------------------------------------------------------------------------------------------------------------------------------------------------------------------------------------------------------------------------------------------------------------------------------------------------------------------------------------------------------------------------------------------------|
| signaling receptor activity                                  | 1.50E-95 | 128                     | 1587                | EPHB3,EPHB6,IL10RA,IL10RB,EPOR,IL12RB1,NR2C1,HCAR2,ERBB3,TNFRSF9,RAMP1,CRLF1,PDGFRB,SIGMAR1,GPR85,TGFB3L,ADGRB2,GPR135,IL20RA,ADGRG1,NMUR1,TLR7,TSHR,ITGA2,NR6A1,ACVR1B,TNFRSF10B,ACVRL1,GFRA4,PTGER3,IL1RL2,PTGFR,ITGB5,ITGB6,TLR8,BDKRB2,CHRNA4,GFRA2,ADCYAP1R1,FZD4,FZD6,PROKR1,ADORA2B,ADRA1D,BMPR1B,ADRA1B,ADRB2,KISS1R,PTPRC,PTPRE,EDAR,PROKR2,FCGR2B,FCGR3B,PTPRO,PTPRZ1,CXCR4,AGER,PGRMC2,AGTR1,PVR,HRH1,P2RY14,C3AR1,PLAUR,ADGRF4,C5AR1,GRIN3A,ADGRL3,CNR2,VDR,OGFRL1,XCR1,LILRB3,NPR3,HTR2A,GPR65,MCHR1,NTRK2,NTRK3,FPR1,ROR1,NR4A2,ADGRL1,GRIA4,NR4A3,GRIN2A,GPRCSA,PTPRU,ACKR4,FAS,NR1D1,S1PR1,NR2F2,IFNLR1,CD200R1,ADGRG6,IFNGR2,MST1R,TGFB3,ANTXR1,THRB,CELSR2,P2RX7,P2RY2,CXCR6,P2RY6,IL17RE,GPR153,IL21R,UNC5C,NR5A2,TREM2,ROBO1,RORB,LPAR2,IL1RL1,ACKR1,IL1RAP,IL1RN,RTN4RL2,IL2RG,GABBR1,GPRC5B,EPHA1,EPHA3,EPHA7,SORL1 |
| molecular transducer activity                                | 1.50E-95 | 128                     | 1587                | EPHB3,EPHB6,IL10RA,IL10RB,EPOR,IL12RB1,NR2C1,HCAR2,ERBB3,TNFRSF9,RAMP1,CRLF1,PDGFRB,SIGMAR1,GPR85,TGFB3L,ADGRB2,GPR135,IL20RA,ADGRG1,NMUR1,TLR7,TSHR,ITGA2,NR6A1,ACVR1B,TNFRSF10B,ACVRL1,GFRA4,PTGER3,IL1RL2,PTGFR,ITGB5,ITGB6,TLR8,BDKRB2,CHRNA4,GFRA2,ADCYAP1R1,FZD4,FZD6,PROKR1,ADORA2B,ADRA1D,BMPR1B,ADRA1B,ADRB2,KISS1R,PTPRC,PTPRE,EDAR,PROKR2,FCGR2B,FCGR3B,PTPRO,PTPRZ1,CXCR4,AGER,PGRMC2,AGTR1,PVR,HRH1,P2RY14,C3AR1,PLAUR,ADGRF4,C5AR1,GRIN3A,ADGRL3,CNR2,VDR,OGFRL1,XCR1,LILRB3,NPR3,HTR2A,GPR65,MCHR1,NTRK2,NTRK3,FPR1,ROR1,NR4A2,ADGRL1,GRIA4,NR4A3,GRIN2A,GPRCSA,PTPRU,ACKR4,FAS,NR1D1,S1PR1,NR2F2,IFNLR1,CD200R1,ADGRG6,IFNGR2,MST1R,TGFB3,ANTXR1,THRB,CELSR2,P2RX7,P2RY2,CXCR6,P2RY6,IL17RE,GPR153,IL21R,UNC5C,NR5A2,TREM2,ROBO1,RORB,LPAR2,IL1RL1,ACKR1,IL1RAP,IL1RN,RTN4RL2,IL2RG,GABBR1,GPRC5B,EPHA1,EPHA3,EPHA7,SORL1 |
| transmembrane signaling receptor activity                    | 9.87E-80 | 110                     | 1331                | EPHB3,EPHB6,IL10RA,IL10RB,EPOR,IL12RB1,HCAR2,ERBB3,RAMP1,CRLF1,PDGFRB,SIGMAR1,GPR85,TGFB3L,ADGRB2,GPR135,IL20RA,ADGRG1,NMUR1,TLR7,TSHR,ITGA2,ACVR1B,ACVRL1,GFRA4,PTGER3,IL1RL2,PTGFR,TLR8,BDKRB2,CHRNA4,GFRA2,ADCYAP1R1,FZD4,FZD6,PROKR1,ADORA2B,ADRA1D,BMPR1B,ADRA1B,ADRB2,KISS1R,PTPRC,PTPRE,EDAR,PROKR2,FCGR2B,FCGR3B,PTPRO,PTPRZ1,CXCR4,AGER,AGTR1,HRH1,P2RY14,C3AR1,ADGRF4,C5AR1,GRIN3A,ADGRL3,CNR2,OGFRL1,XCR1,LILRB3,NPR3,HTR2A,GPR65,MCHR1,NTRK2,NTRK3,FPR1,ROR1,ADGRL1,GRIA4,GRIN2A,GPRCSA,PTPRU,ACKR4,FAS,S1PR1,IFNLR1,CD200R1,ADGRG6,IFNGR2,MST1R,TGFB3,ANTXR1,CELSR2,P2RX7,P2RY2,CXCR6,P2RY6,IL17RE,GPR153,IL21R,UNC5C,TREM2,ROBO1,RORB,LPAR2,IL1RL1,ACKR1,IL1RAP,IL2RG,GABBR1,GPRC5B,EPHA1,EPHA3,EPHA7,SORL1                                                                                                                 |
| G protein-coupled receptor activity                          | 2.92E-29 | 54                      | 873                 | HCAR2,RAMP1,PDGFRB,SIGMAR1,GPR85,ADGRB2,GPR135,ADGRG1,NMUR1,TSHR,PTGER3,PTGFR,BDKRB2,ADCYAP1R1,FZD4,FZD6,PROKR1,ADORA2B,ADRA1D,ADRA1B,ADRB2,KISS1R,PROKR2,CXCR4,AGTR1,HRH1,P2RY14,C3AR1,ADGRF4,C5AR1,ADGRL3,CNR2,OGFRL1,XCR1,NPR3,HTR2A,GPR65,MCHR1,FPRI,ADGRL1,GPRCSA,ACKR4,S1PR1,ADGRG6,CELSR2,P2RY2,CXCR6,P2RY6,GPR153,RORB,LPAR2,ACKR1,GABBR1,GPRC5B                                                                                                                                                                                                                                                                                                                                                                                                                                                                                  |
| cytokine binding                                             | 1.64E-28 | 30                      | 184                 | IL10RA,IL10RB,EPOR,IL12RB1,TNFRSF9,CRLF1,TGFB3L,IL20RA,ACVRL1,GFRA4,IL1RL2,GFRA2,FZD4,BMPR1B,CXCR4,AGER,XCR1,ACKR4,FAS,IFNLR1,IFNGR2,TGFB3,CXCR6,IL17RE,IL21R,IL1RL1,ACKR1,IL1RAP,IL1RN,IL2RG                                                                                                                                                                                                                                                                                                                                                                                                                                                                                                                                                                                                                                             |
| immune receptor activity                                     | 2.96E-26 | 26                      | 141                 | IL10RA,IL10RB,EPOR,IL12RB1,CRLF1,IL20RA,GFRA4,IL1RL2,GFRA2,FZD4,FCGR2B,CXCR4,C3AR1,C5AR1,XCR1,FPR1,ACKR4,IFNLR1,CD200R1,IFNGR2,CXCR6,IL17RE,IL21R,IL1RL1,IL1RAP,IL2RG                                                                                                                                                                                                                                                                                                                                                                                                                                                                                                                                                                                                                                                                     |
| cytokine receptor activity                                   | 6.08E-23 | 21                      | 97                  | IL10RA,IL10RB,EPOR,IL12RB1,CRLF1,IL20RA,GFRA4,IL1RL2,GFRA2,FZD4,CXCR4,XCR1,ACKR4,IFNLR1,IFNGR2,CXCR6,IL17RE,IL21R,IL1RL1,IL1RAP,IL2RG                                                                                                                                                                                                                                                                                                                                                                                                                                                                                                                                                                                                                                                                                                     |
| peptide binding                                              | 5.74E-20 | 33                      | 452                 | RAMP1,SIGMAR1,NMUR1,TSHR,ITGA2,PGRMC1,BDKRB2,ADCYAP1R1,FZD4,FZD6,PROKR1,ADRB2,KISS1R,PROKR2,FCGR2B,CXCR4,AGER,AGTR1,GPRASP2,KDELRL3,OGFRL1,XCR1,LILRB3,NPR3,MCHR1,FPR1,GRIA4,GRIN2A,ACKR4,LDLR,CXCR6,TREM2,SORL1                                                                                                                                                                                                                                                                                                                                                                                                                                                                                                                                                                                                                          |
| amide binding                                                | 1.40E-17 | 33                      | 542                 | RAMP1,SIGMAR1,NMUR1,TSHR,ITGA2,PGRMC1,BDKRB2,ADCYAP1R1,FZD4,FZD6,PROKR1,ADRB2,KISS1R,PROKR2,FCGR2B,CXCR4,AGER,AGTR1,GPRASP2,KDELRL3,OGFRL1,XCR1,LILRB3,NPR3,MCHR1,FPR1,GRIA4,GRIN2A,ACKR4,LDLR,CXCR6,TREM2,SORL1                                                                                                                                                                                                                                                                                                                                                                                                                                                                                                                                                                                                                          |
| transmembrane receptor protein kinase activity               | 1.30E-16 | 16                      | 86                  | EPHB3,EPHB6,ERBB3,PDGFRB,TGFB3L,ACVR1B,ACVRL1,BMPR1B,NTRK2,NTRK3,ROR1,MST1R,TGFB3,EPHA1,EPHA3,EPHA7                                                                                                                                                                                                                                                                                                                                                                                                                                                                                                                                                                                                                                                                                                                                       |
| G protein-coupled peptide receptor activity                  | 4.86E-15 | 18                      | 150                 | RAMP1,SIGMAR1,NMUR1,TSHR,BDKRB2,ADCYAP1R1,PROKR1,KISS1R,PROKR2,CXCR4,AGTR1,OGFRL1,XCR1,NPR3,MCHR1,FPR1,ACKR4,CXCR6                                                                                                                                                                                                                                                                                                                                                                                                                                                                                                                                                                                                                                                                                                                        |
| peptide receptor activity                                    | 7.77E-15 | 18                      | 154                 | RAMP1,SIGMAR1,NMUR1,TSHR,BDKRB2,ADCYAP1R1,PROKR1,KISS1R,PROKR2,CXCR4,AGTR1,OGFRL1,XCR1,NPR3,MCHR1,FPR1,ACKR4,CXCR6                                                                                                                                                                                                                                                                                                                                                                                                                                                                                                                                                                                                                                                                                                                        |
| amyloid-beta binding                                         | 1.49E-13 | 14                      | 90                  | ITGA2,PGRMC1,FZD4,FZD6,ADRB2,FCGR2B,AGER,GPRASP2,LILRB3,GRIA4,GRIN2A,LDLR,TREM2,SORL1                                                                                                                                                                                                                                                                                                                                                                                                                                                                                                                                                                                                                                                                                                                                                     |
| nuclear receptor activity                                    | 1.88E-12 | 11                      | 52                  | NR2C1,NR6A1,VDR,NR4A2,NR4A3,NR1D1,NR2F2,ARNT,THRB,NR5A2,RORB                                                                                                                                                                                                                                                                                                                                                                                                                                                                                                                                                                                                                                                                                                                                                                              |
| ligand-activated transcription factor activity               | 1.88E-12 | 11                      | 52                  | NR2C1,NR6A1,VDR,NR4A2,NR4A3,NR1D1,NR2F2,ARNT,THRB,NR5A2,RORB                                                                                                                                                                                                                                                                                                                                                                                                                                                                                                                                                                                                                                                                                                                                                                              |
| steroid hormone receptor activity                            | 3.62E-12 | 11                      | 55                  | NR2C1,NR6A1,PGRMC2,VDR,NR4A2,NR4A3,NR1D1,NR2F2,THRB,NR5A2,RORB                                                                                                                                                                                                                                                                                                                                                                                                                                                                                                                                                                                                                                                                                                                                                                            |
| signaling receptor binding                                   | 5.23E-12 | 50                      | 1842                | IL12RB1,NRIP1,ERBB3,TRAF1,CRLF1,PDGFRB,TGFB3L,RIPK2,ITGA2,ITGA3,ITGA7,RTPA,ITGB5,ITGB6,BDKRB2,PPARGC1A,ADRB2,PTPRC,F11R,PTPRZ1,AGTR1,PLAUR,GPRASP2,VDR,RAPSN,MCHR1,NTRK2,FPR1,NR4A2,CNIP1,GRB10,RER1,GRB14,NR4A3,GRIN2A,S1PR1,GRIP1,TGFB3,PPARGC1B,ARNT,P2RX7,P2RY2,MRAP,TRBC2,IL1RAP,IL1RN,LRIF1,CXADR,GPRC5B,EPHA7                                                                                                                                                                                                                                                                                                                                                                                                                                                                                                                      |
| growth factor binding                                        | 6.27E-12 | 16                      | 168                 | IL10RA,IL10RB,ERBB3,PDGFRB,TGFB3L,ACVR1B,ACVRL1,IL1RL2,PTPRZ1,NTRK2,NTRK3,TGFB3,IL1RL1,IL1RAP,IL1RN,IL2RG                                                                                                                                                                                                                                                                                                                                                                                                                                                                                                                                                                                                                                                                                                                                 |
| transmembrane receptor protein tyrosine kinase activity      | 3.53E-11 | 11                      | 67                  | EPHB3,EPHB6,ERBB3,PDGFRB,NTRK2,NTRK3,ROR1,MST1R,EPHA1,EPHA3,EPHA7                                                                                                                                                                                                                                                                                                                                                                                                                                                                                                                                                                                                                                                                                                                                                                         |
| protein tyrosine kinase activity                             | 1.59E-08 | 12                      | 146                 | EPHB3,EPHB6,ERBB3,PDGFRB,RIPK2,NTRK2,NTRK3,ROR1,MST1R,EPHA1,EPHA3,EPHA7                                                                                                                                                                                                                                                                                                                                                                                                                                                                                                                                                                                                                                                                                                                                                                   |
| ephrin receptor activity                                     | 1.69E-08 | 6                       | 19                  | EPHB3,EPHB6,NTRK3,EPHA1,EPHA3,EPHA7                                                                                                                                                                                                                                                                                                                                                                                                                                                                                                                                                                                                                                                                                                                                                                                                       |
| virus receptor activity                                      | 6.18E-08 | 9                       | 79                  | ITGA2,ITGB5,ITGB6,F11R,CXCR4,PVR,HTR2A,LDLR,CXADR                                                                                                                                                                                                                                                                                                                                                                                                                                                                                                                                                                                                                                                                                                                                                                                         |
| exogenous protein binding                                    | 6.91E-08 | 9                       | 80                  | ITGA2,ITGB5,ITGB6,F11R,CXCR4,PVR,HTR2A,LDLR,CXADR                                                                                                                                                                                                                                                                                                                                                                                                                                                                                                                                                                                                                                                                                                                                                                                         |
| transmembrane receptor protein tyrosine phosphatase activity | 4.20E-07 | 5                       | 17                  | PTPRC,PTPRE,PTPRO,PTPRZ1,PTPRU                                                                                                                                                                                                                                                                                                                                                                                                                                                                                                                                                                                                                                                                                                                                                                                                            |
| transmembrane-ephrin receptor activity                       | 4.20E-07 | 5                       | 17                  | EPHB3,EPHB6,EPHA1,EPHA3,EPHA7                                                                                                                                                                                                                                                                                                                                                                                                                                                                                                                                                                                                                                                                                                                                                                                                             |

|                                                                                              |          |    |      |                                                                                                                                                                                                           |
|----------------------------------------------------------------------------------------------|----------|----|------|-----------------------------------------------------------------------------------------------------------------------------------------------------------------------------------------------------------|
| transmembrane receptor protein phosphatase activity                                          | 4.20E-07 | 5  | 17   | PTPRC,PTPRE,PTPRO,PTPRZ1,PTPRU                                                                                                                                                                            |
| transmembrane receptor protein serine/threonine kinase activity                              | 7.77E-07 | 5  | 19   | TGFB3L,ACVR1B,ACVRL1,BMPR1B,TGFBR3                                                                                                                                                                        |
| neuropeptide binding                                                                         | 9.96E-07 | 7  | 56   | NMUR1,ADCYAP1R1,PROKR1,KISS1R,PROKR2,MCHR1,SORL1                                                                                                                                                          |
| cargo receptor activity                                                                      | 1.14E-06 | 8  | 82   | SCARF2,AGER,SCARA3,ACKR4,LDLR,OLR1,SCARA5,SORL1                                                                                                                                                           |
| G protein-coupled pyrimidinergic nucleotide receptor activity                                | 3.38E-06 | 3  | 4    | P2RY14,P2RY2,P2RY6                                                                                                                                                                                        |
| C-C chemokine binding                                                                        | 3.39E-06 | 5  | 25   | CXCR4,XCR1,ACKR4,CXCR6,ACKR1                                                                                                                                                                              |
| transforming growth factor beta-activated receptor activity                                  | 5.34E-06 | 4  | 13   | TGFB3L,ACVRL1,BMPR1B,TGFBR3                                                                                                                                                                               |
| coreceptor activity                                                                          | 9.76E-06 | 6  | 52   | RAMP1,GFRA4,CXCR4,ROR1,TGFBR3,CXCR6                                                                                                                                                                       |
| protein-containing complex binding                                                           | 1.21E-05 | 33 | 1565 | ADGRG1,TSHR,ITGA2,ITGA2B,ACVR1B,ITGA3,ACVRL1,ITGA7,ITGB5,ITGB6,CHRNA4,ITPR3,FZD4,ADRB2,PTPRC,F11R,FCGR2B,FCGR3B,PTPRZ1,AGER,HTR2A,GRB10,GRIN2A,FAS,LDLR,OLR1,CD200R1,ADGRG6,TGFBR3,ARNT,TREM2,CXADR,SORL1 |
| ligand-gated cation channel activity                                                         | 1.27E-05 | 8  | 113  | CHRNA4,RYR3,ITPR3,TRPM5,GRIN3A,GRIA4,GRIN2A,P2RX7                                                                                                                                                         |
| interleukin-1 binding                                                                        | 1.33E-05 | 4  | 16   | IL1RL2,IL1RL1,IL1RAP,IL1RN                                                                                                                                                                                |
| chemokine binding                                                                            | 2.53E-05 | 5  | 37   | CXCR4,XCR1,ACKR4,CXCR6,ACKR1                                                                                                                                                                              |
| GPI-linked ephrin receptor activity                                                          | 2.90E-05 | 3  | 7    | NTRK3,EPHA3,EPHA7                                                                                                                                                                                         |
| extracellular matrix binding                                                                 | 3.27E-05 | 6  | 64   | ADGRG1,ITGA2,ITGA2B,ITGA3,ITGA7,ADGRG6                                                                                                                                                                    |
| glucocorticoid receptor binding                                                              | 3.43E-05 | 4  | 20   | NRIP1,NR4A2,NR4A3,GRIP1                                                                                                                                                                                   |
| protein kinase activity                                                                      | 3.94E-05 | 20 | 759  | EPHB3,EPHB6,ERBB3,PDGFRB,TGFBR3L,RIPK2,ACVR1B,ACVRL1,BMPR1B,NTRK2,NTRK3,GRK5,ROR1,GPRC5A,MST1R,TGFBR3,GPRC5B,EPHA1,EPHA3,EPHA7                                                                            |
| nucleotide receptor activity                                                                 | 4.21E-05 | 4  | 21   | P2RY14,P2RX7,P2RY2,P2RY6                                                                                                                                                                                  |
| purinergic nucleotide receptor activity                                                      | 4.21E-05 | 4  | 21   | P2RY14,P2RX7,P2RY2,P2RY6                                                                                                                                                                                  |
| interleukin-1 receptor activity                                                              | 4.60E-05 | 3  | 8    | IL1RL2,IL1RL1,IL1RAP                                                                                                                                                                                      |
| C-C chemokine receptor activity                                                              | 6.13E-05 | 4  | 23   | CXCR4,XCR1,ACKR4,CXCR6                                                                                                                                                                                    |
| neuropeptide receptor activity                                                               | 6.68E-05 | 5  | 45   | NMUR1,PROKR1,KISS1R,PROKR2,MCHR1                                                                                                                                                                          |
| adrenergic receptor activity                                                                 | 6.86E-05 | 3  | 9    | ADRA1D,ADRA1B,ADRB2                                                                                                                                                                                       |
| protein tyrosine phosphatase activity                                                        | 7.44E-05 | 7  | 107  | PTPN7,PTPN13,PTPRC,PTPRE,PTPRO,PTPRZ1,PTPRU                                                                                                                                                               |
| ligand-gated ion channel activity                                                            | 8.43E-05 | 8  | 147  | CHRNA4,RYR3,ITPR3,TRPM5,GRIN3A,GRIA4,GRIN2A,P2RX7                                                                                                                                                         |
| interleukin-33 receptor activity                                                             | 9.12E-05 | 2  | 2    | IL1RL1,IL1RAP                                                                                                                                                                                             |
| interleukin-33 binding                                                                       | 9.12E-05 | 2  | 2    | IL1RL1,IL1RAP                                                                                                                                                                                             |
| interleukin-10 binding                                                                       | 9.12E-05 | 2  | 2    | IL10RA,IL10RB                                                                                                                                                                                             |
| interleukin-10 receptor activity                                                             | 9.12E-05 | 2  | 2    | IL10RA,IL10RB                                                                                                                                                                                             |
| G protein-coupled UDP receptor activity                                                      | 9.12E-05 | 2  | 2    | P2RY14,P2RY6                                                                                                                                                                                              |
| ligand-gated channel activity                                                                | 9.71E-05 | 8  | 150  | CHRNA4,RYR3,ITPR3,TRPM5,GRIN3A,GRIA4,GRIN2A,P2RX7                                                                                                                                                         |
| ligand-gated calcium channel activity                                                        | 1.01E-04 | 4  | 26   | RYR3,ITPR3,TRPM5,GRIN2A                                                                                                                                                                                   |
| G protein-coupled chemoattractant receptor activity                                          | 1.01E-04 | 4  | 26   | CXCR4,XCR1,ACKR4,CXCR6                                                                                                                                                                                    |
| chemokine receptor activity                                                                  | 1.01E-04 | 4  | 26   | CXCR4,XCR1,ACKR4,CXCR6                                                                                                                                                                                    |
| molecular adaptor activity                                                                   | 1.12E-04 | 14 | 451  | EPS8,SCARF2,AGER,SCARA3,RAPSN,SPSB1,GRB10,GRB14,ACKR4,LDLR,OLR1,GRIP1,SCARA5,SORL1                                                                                                                        |
| low-density lipoprotein particle binding                                                     | 1.18E-04 | 4  | 27   | LDLR,OLR1,TREM2,SORL1                                                                                                                                                                                     |
| G protein-coupled amine receptor activity                                                    | 1.23E-04 | 5  | 51   | ADRA1D,ADRA1B,ADRB2,HRH1,HTR2A                                                                                                                                                                            |
| cell adhesion molecule binding                                                               | 1.25E-04 | 16 | 573  | TRPC4,ITGA2,ITGA3,ITGA7,ITGB5,ITGB6,EP515L1,F11R,PTPRO,PTPRZ1,PVR,ADGRL1,GRIN2A,GPRC5A,CD200R1,CXADR                                                                                                      |
| axon guidance receptor activity                                                              | 1.33E-04 | 3  | 11   | EPHB3,ROBO1,EPHA7                                                                                                                                                                                         |
| integrin binding                                                                             | 1.33E-04 | 8  | 157  | ITGA2,ITGA3,ITGA7,ITGB5,ITGB6,F11R,PTPRZ1,CXADR                                                                                                                                                           |
| scavenger receptor activity                                                                  | 1.35E-04 | 5  | 52   | SCARF2,AGER,SCARA3,ACKR4,SCARA5                                                                                                                                                                           |
| nuclear receptor binding                                                                     | 1.61E-04 | 7  | 121  | NRIP1,PPARGC1A,VDR,NR4A2,NR4A3,GRIP1,PPARGC1B                                                                                                                                                             |
| complement receptor activity                                                                 | 1.76E-04 | 3  | 12   | C3AR1,C5AR1,FPR1                                                                                                                                                                                          |
| neurotransmitter receptor activity involved in regulation of postsynaptic membrane potential | 1.76E-04 | 5  | 55   | CHRNA4,GRIN3A,GRIA4,GRIN2A,GABBR1                                                                                                                                                                         |
| neurotransmitter receptor activity                                                           | 2.07E-04 | 7  | 126  | CHRNA4,HRH1,GRIN3A,HTR2A,GRIA4,GRIN2A,GABBR1                                                                                                                                                              |
| pyrimidine nucleotide binding                                                                | 2.27E-04 | 3  | 13   | P2RY14,P2RY2,P2RY6                                                                                                                                                                                        |
| G protein-coupled receptor binding                                                           | 2.60E-04 | 11 | 320  | RTP4,BDKRB2,ADRB2,AGTR1,GPRASP2,FPR1,CNRIP1,S1PR1,P2RY2,MRAP,GPRC5B                                                                                                                                       |
| Wnt-protein binding                                                                          | 2.63E-04 | 4  | 33   | FZD4,FZD6,PTPRO,ROR1                                                                                                                                                                                      |
| phosphotransferase activity, alcohol group as acceptor                                       | 2.68E-04 | 20 | 875  | EPHB3,EPHB6,ERBB3,PDGFRB,TGFBR3L,RIPK2,ACVR1B,ACVRL1,BMPR1B,NTRK3,NTRK3,GRK5,ROR1,GPRC5A,MST1R,TGFBR3,GPRC5B,EPHA1,EPHA3,EPHA7                                                                            |
| bradykinin receptor binding                                                                  | 2.69E-04 | 2  | 3    | ADRB2,AGTR1                                                                                                                                                                                               |
| alpha1-adrenergic receptor activity                                                          | 2.69E-04 | 2  | 3    | ADRA1D,ADRA1B                                                                                                                                                                                             |
| G protein-coupled UTP receptor activity                                                      | 2.69E-04 | 2  | 3    | P2RY2,P2RY6                                                                                                                                                                                               |
| neurotransmitter binding                                                                     | 2.76E-04 | 7  | 132  | CHRNA4,HRH1,GRIN3A,HTR2A,GRIA4,GRIN2A,GABBR1                                                                                                                                                              |



|                                                                                                  |          |    |      |                                                                                                                                                   |
|--------------------------------------------------------------------------------------------------|----------|----|------|---------------------------------------------------------------------------------------------------------------------------------------------------|
| low-density lipoprotein particle receptor activity                                               | 2.87E-04 | 3  | 14   | LDLR, OLR1, SORL1                                                                                                                                 |
| G protein-coupled purinergic nucleotide receptor activity                                        | 2.87E-04 | 3  | 14   | P2RY14, P2RY2, P2RY6                                                                                                                              |
| retinoic acid receptor binding                                                                   | 2.96E-04 | 4  | 34   | NRIP1, VDR, NR4A2, LRIF1                                                                                                                          |
| laminin binding                                                                                  | 2.96E-04 | 4  | 34   | ITGA2, ITGA3, ITGA7, ADGRG6                                                                                                                       |
| Wnt-activated receptor activity                                                                  | 4.35E-04 | 3  | 16   | FZD4, FZD6, ROR1                                                                                                                                  |
| NAD(P)+ nucleosidase activity                                                                    | 4.35E-04 | 3  | 16   | IL1RL2, IL1RL1, IL1RAP                                                                                                                            |
| NAD+ nucleotidase, cyclic ADP-ribose generating                                                  | 4.35E-04 | 3  | 16   | IL1RL2, IL1RL1, IL1RAP                                                                                                                            |
| cyclic ADP-ribose hydrolase                                                                      | 4.35E-04 | 3  | 16   | IL1RL2, IL1RL1, IL1RAP                                                                                                                            |
| ADP-ribosyl cyclase activity                                                                     | 4.35E-04 | 3  | 16   | IL1RL2, IL1RL1, IL1RAP                                                                                                                            |
| activin binding                                                                                  | 5.25E-04 | 3  | 17   | ACVR1B, ACVRL1, TGFBR3                                                                                                                            |
| NAD+ nucleosidase activity                                                                       | 5.25E-04 | 3  | 17   | IL1RL2, IL1RL1, IL1RAP                                                                                                                            |
| calcium ion transmembrane transporter activity                                                   | 6.20E-04 | 7  | 151  | TRPC4, RYR3, ITPR3, TRPM5, HRH1, GRIN3A, GRIN2A                                                                                                   |
| kinase activity                                                                                  | 6.65E-04 | 20 | 940  | EPHB3, EPHB6, ERBB3, PDGFRB, TGFBR3L, RIPK2, ACVR1B, ACVRL1, BMPR1B, NTRK2, NTRK3, GRK5, ROR1, GPRC5A, MST1R, TGFBR3, GPRC5B, EPHA1, EPHA3, EPHA7 |
| hormone receptor binding                                                                         | 6.81E-04 | 8  | 200  | NRIP1, PPARGC1A, VDR, NR4A2, NR4A3, GRIP1, PPARGC1B, LRIF1                                                                                        |
| lipoprotein particle binding                                                                     | 7.37E-04 | 4  | 43   | LDLR, OLR1, TREM2, SORL1                                                                                                                          |
| protein-lipid complex binding                                                                    | 7.37E-04 | 4  | 43   | LDLR, OLR1, TREM2, SORL1                                                                                                                          |
| lipoprotein particle receptor activity                                                           | 7.37E-04 | 3  | 19   | LDLR, OLR1, SORL1                                                                                                                                 |
| ionotropic glutamate receptor activity                                                           | 7.37E-04 | 3  | 19   | GRIN3A, GRIA4, GRIN2A                                                                                                                             |
| extracellular ligand-gated ion channel activity                                                  | 7.96E-04 | 5  | 76   | CHRNA4, GRIN3A, GRIA4, GRIN2A, P2RX7                                                                                                              |
| activin receptor activity, type I                                                                | 8.86E-04 | 2  | 5    | ACVR1B, ACVRL1                                                                                                                                    |
| glial cell-derived neurotrophic factor receptor activity                                         | 8.86E-04 | 2  | 5    | GFRA4, GFRA2                                                                                                                                      |
| neurotrophin receptor activity                                                                   | 8.86E-04 | 2  | 5    | NTRK2, NTRK3                                                                                                                                      |
| transforming growth factor beta receptor activity, type I                                        | 8.86E-04 | 2  | 5    | ACVRL1, BMPR1B                                                                                                                                    |
| postsynaptic neurotransmitter receptor activity                                                  | 1.25E-03 | 5  | 84   | CHRNA4, GRIN3A, GRIA4, GRIN2A, GABBR1                                                                                                             |
| retinoid X receptor binding                                                                      | 1.31E-03 | 3  | 23   | NRIP1, VDR, NR4A2                                                                                                                                 |
| alpha-adrenergic receptor activity                                                               | 1.32E-03 | 2  | 6    | ADRA1D, ADRA1B                                                                                                                                    |
| transmitter-gated ion channel activity involved in regulation of postsynaptic membrane potential | 1.51E-03 | 4  | 52   | CHRNA4, GRIN3A, GRIA4, GRIN2A                                                                                                                     |
| calcium channel activity                                                                         | 1.68E-03 | 6  | 132  | TRPC4, RYR3, ITPR3, TRPM5, GRIN3A, GRIN2A                                                                                                         |
| very-low-density lipoprotein particle binding                                                    | 1.84E-03 | 2  | 7    | LDLR, TREM2                                                                                                                                       |
| BMP receptor activity                                                                            | 1.84E-03 | 2  | 7    | ACVRL1, BMPR1B                                                                                                                                    |
| transforming growth factor beta binding                                                          | 2.10E-03 | 3  | 27   | TGFBR3L, ACVRL1, TGFBR3                                                                                                                           |
| glutamate receptor activity                                                                      | 2.10E-03 | 3  | 27   | GRIN3A, GRIA4, GRIN2A                                                                                                                             |
| beta-catenin binding                                                                             | 2.26E-03 | 5  | 96   | TRPC4, NR4A2, PTPRU, GRIP1, CXADR                                                                                                                 |
| C-X-C chemokine receptor activity                                                                | 2.44E-03 | 2  | 8    | CXCR4, CXCR6                                                                                                                                      |
| immunoglobulin receptor activity                                                                 | 2.44E-03 | 2  | 8    | FCGR2B, CD200R1                                                                                                                                   |
| NMDA glutamate receptor activity                                                                 | 2.44E-03 | 2  | 8    | GRIN3A, GRIN2A                                                                                                                                    |
| transmitter-gated channel activity                                                               | 2.73E-03 | 4  | 61   | CHRNA4, GRIN3A, GRIA4, GRIN2A                                                                                                                     |
| transmitter-gated ion channel activity                                                           | 2.73E-03 | 4  | 61   | CHRNA4, GRIN3A, GRIA4, GRIN2A                                                                                                                     |
| hormone binding                                                                                  | 2.94E-03 | 5  | 102  | RAMP1, ADCYAP1R1, NPR3, MCHR1, THRB                                                                                                               |
| heme transmembrane transporter activity                                                          | 3.11E-03 | 2  | 9    | PGRMC2, FLVCR2                                                                                                                                    |
| type II transforming growth factor beta receptor binding                                         | 3.11E-03 | 2  | 9    | TGFBR3L, TGFBR3                                                                                                                                   |
| G protein-coupled opioid receptor activity                                                       | 3.11E-03 | 2  | 9    | SIGMAR1, OGFRL1                                                                                                                                   |
| RNA polymerase II-specific DNA-binding transcription factor binding                              | 3.11E-03 | 9  | 312  | NRIP1, PPARGC1A, VDR, NR4A2, NR4A3, GRIP1, PPARGC1B, ARNT, LRIF1                                                                                  |
| immunoglobulin binding                                                                           | 3.14E-03 | 3  | 31   | FCGR2B, FCGR3B, CD200R1                                                                                                                           |
| complement binding                                                                               | 3.45E-03 | 3  | 32   | C3AR1, C5AR1, FPR1                                                                                                                                |
| C-X-C chemokine binding                                                                          | 3.87E-03 | 2  | 10   | CXCR4, CXCR6                                                                                                                                      |
| activin-activated receptor activity                                                              | 3.87E-03 | 2  | 10   | ACVR1B, ACVRL1                                                                                                                                    |
| neuropeptide Y receptor activity                                                                 | 3.87E-03 | 2  | 10   | PROKR1, PROKR2                                                                                                                                    |
| protein dimerization activity                                                                    | 3.92E-03 | 20 | 1093 | NR2C1, ERBB3, RIPK2, NR6A1, ITGA3, PGRMC1, BDKRB2, FZD4, ADRA1B, ADRB2, F11R, PTPRO, AGTR1, NPR3, NTRK2, NR4A2, NR4A3, NR2F2, ARNT, GABBR1        |
| transferase activity, transferring phosphorus-containing groups                                  | 4.34E-03 | 20 | 1103 | EPHB3, EPHB6, ERBB3, PDGFRB, TGFBR3L, RIPK2, ACVR1B, ACVRL1, BMPR1B, NTRK2, NTRK3, GRK5, ROR1, GPRC5A, MST1R, TGFBR3, GPRC5B, EPHA1, EPHA3, EPHA7 |
| glutamate binding                                                                                | 4.45E-03 | 3  | 35   | GRIN3A, GRIA4, GRIN2A                                                                                                                             |
| IgG binding                                                                                      | 4.69E-03 | 2  | 11   | FCGR2B, FCGR3B                                                                                                                                    |

|                                                                                         |          |    |     |                                                                                          |
|-----------------------------------------------------------------------------------------|----------|----|-----|------------------------------------------------------------------------------------------|
| neurotrophin binding                                                                    | 4.69E-03 | 2  | 11  | NTRK2,NTRK3                                                                              |
| prostaglandin receptor activity                                                         | 4.69E-03 | 2  | 11  | PTGER3,PTGFR                                                                             |
| excitatory extracellular ligand-gated ion channel activity                              | 4.82E-03 | 3  | 36  | CHRNA4,GRIN2A,P2RX7                                                                      |
| PDZ domain binding                                                                      | 5.28E-03 | 5  | 117 | FZD4,F11R,TGFBR3,LPAR2,CXADR                                                             |
| prostanoid receptor activity                                                            | 5.60E-03 | 2  | 12  | PTGER3,PTGFR                                                                             |
| cation channel activity                                                                 | 6.08E-03 | 10 | 410 | TRPC4,CHRNA4,RYR3,ITPR3,ADRB2,TRPM5,GRIN3A,GRIA4,GRIN2A,P2RX7                            |
| hydrolase activity, hydrolyzing N-glycosyl compounds                                    | 6.49E-03 | 3  | 40  | IL1RL2,IL1RL1,IL1RAP                                                                     |
| acetylcholine receptor binding                                                          | 6.57E-03 | 2  | 13  | RAPSN,RER1                                                                               |
| protein heterodimerization activity                                                     | 7.02E-03 | 9  | 354 | ERBB3,ITGA3,BDKRB2,FZD4,ADRA1B,AGTR1,NR4A2,ARNT,GABBR1                                   |
| protein binding involved in heterotypic cell-cell adhesion                              | 7.62E-03 | 2  | 14  | CD200R1,CXADR                                                                            |
| inositol 1,4,5 trisphosphate binding                                                    | 7.62E-03 | 2  | 14  | TRPC4,ITPR3                                                                              |
| phosphoprotein phosphatase activity                                                     | 7.77E-03 | 7  | 237 | PTPN7,PTPN13,PTPRC,PTPRE,PTPRO,PTPRZ1,PTPRU                                              |
| collagen binding                                                                        | 7.84E-03 | 4  | 82  | ADGRG1,ITGA2,ITGA3,ADGRG6                                                                |
| adenylate cyclase binding                                                               | 8.74E-03 | 2  | 15  | ADCYAP1R1,ADRB2                                                                          |
| cyclase activity                                                                        | 9.57E-03 | 3  | 46  | IL1RL2,IL1RL1,IL1RAP                                                                     |
| SMAD binding                                                                            | 9.61E-03 | 4  | 87  | ACVR1B,ACVRL1,BMPR1B,TGFBR3                                                              |
| interleukin-12 receptor activity                                                        | 9.62E-03 | 1  | 1   | IL12RB1                                                                                  |
| ferritin receptor activity                                                              | 9.62E-03 | 1  | 1   | SCARA5                                                                                   |
| complement component C3a receptor activity                                              | 9.62E-03 | 1  | 1   | C3AR1                                                                                    |
| B2 bradykinin receptor binding                                                          | 9.62E-03 | 1  | 1   | ADRB2                                                                                    |
| type 1 cannabinoid receptor binding                                                     | 9.62E-03 | 1  | 1   | CNRIP1                                                                                   |
| transforming growth factor beta receptor activity, type III                             | 9.62E-03 | 1  | 1   | TGFBR3                                                                                   |
| cannabinoid receptor binding                                                            | 9.62E-03 | 1  | 1   | CNRIP1                                                                                   |
| high mobility group box 1 binding                                                       | 9.62E-03 | 1  | 1   | AGER                                                                                     |
| C-X-C motif chemokine 12 receptor activity                                              | 9.62E-03 | 1  | 1   | CXCR4                                                                                    |
| interleukin-21 binding                                                                  | 9.62E-03 | 1  | 1   | IL21R                                                                                    |
| advanced glycation end-product binding                                                  | 9.62E-03 | 1  | 1   | AGER                                                                                     |
| lithocholic acid receptor activity                                                      | 9.62E-03 | 1  | 1   | VDR                                                                                      |
| lithocholic acid binding                                                                | 9.62E-03 | 1  | 1   | VDR                                                                                      |
| netrin receptor activity involved in chemorepulsion                                     | 9.62E-03 | 1  | 1   | UNC5C                                                                                    |
| brain-derived neurotrophic factor-activated receptor activity                           | 9.62E-03 | 1  | 1   | NTRK2                                                                                    |
| low-affinity IgG receptor activity                                                      | 9.62E-03 | 1  | 1   | FCGR2B                                                                                   |
| urokinase plasminogen activator receptor activity                                       | 9.62E-03 | 1  | 1   | PLAUR                                                                                    |
| melanin-concentrating hormone receptor activity                                         | 9.62E-03 | 1  | 1   | MCHR1                                                                                    |
| cell adhesive protein binding involved in AV node cell-bundle of His cell communication | 9.62E-03 | 1  | 1   | CXADR                                                                                    |
| calcitonin gene-related peptide binding                                                 | 9.62E-03 | 1  | 1   | RAMP1                                                                                    |
| erythropoietin receptor activity                                                        | 9.62E-03 | 1  | 1   | EPOR                                                                                     |
| calcitriol binding                                                                      | 9.62E-03 | 1  | 1   | VDR                                                                                      |
| beta2-adrenergic receptor activity                                                      | 9.62E-03 | 1  | 1   | ADRB2                                                                                    |
| nicotinic acid receptor activity                                                        | 9.62E-03 | 1  | 1   | HCAR2                                                                                    |
| interleukin-21 receptor activity                                                        | 9.62E-03 | 1  | 1   | IL21R                                                                                    |
| angiotensin type I receptor activity                                                    | 9.62E-03 | 1  | 1   | AGTR1                                                                                    |
| interleukin-1 type II receptor antagonist activity                                      | 9.62E-03 | 1  | 1   | IL1RN                                                                                    |
| interleukin-1 type I receptor antagonist activity                                       | 9.62E-03 | 1  | 1   | IL1RN                                                                                    |
| bioactive lipid receptor activity                                                       | 9.93E-03 | 2  | 16  | S1PR1,LPAR2                                                                              |
| icosanoid receptor activity                                                             | 9.93E-03 | 2  | 16  | PTGER3,PTGFR                                                                             |
| calcium-release channel activity                                                        | 1.12E-02 | 2  | 17  | RYR3,ITPR3                                                                               |
| transcription factor binding                                                            | 1.15E-02 | 14 | 740 | NRIP1,TNFRSF10B,PPARGC1A,VDR,NR4A2,NR4A3,NR1D1,GRIP1,PPARGC1B,ARNT,THRB,RORB,LRI1,GABBR1 |
| carboxylic acid binding                                                                 | 1.35E-02 | 7  | 264 | PTGER3,PTGFR,GRIN3A,VDR,GRIA4,GRIN2A,NR2F2                                               |
| protein-hormone receptor activity                                                       | 1.39E-02 | 2  | 19  | TSHR,MCHR1                                                                               |
| estrogen receptor binding                                                               | 1.41E-02 | 3  | 53  | NRIP1,PPARGC1A,PPARGC1B                                                                  |
| interleukin-1 receptor binding                                                          | 1.53E-02 | 2  | 20  | IL1RAP,IL1RN                                                                             |

Supp. Table S5: 500 DEGs used as input in hub gene analysis.

| Symbol        | Entrez    | log2FC | q-value  |
|---------------|-----------|--------|----------|
| 1700007K13Rik | 69327     | -3.215 | 1.00E-06 |
| 9330159F19Rik | 212448    | 4.971  | 1.00E-06 |
| A630023A22Rik | 105518    | 4.580  | 1.00E-06 |
| Acot1         | 26897     | 4.087  | 1.00E-06 |
| Adcyap1r1     | 11517     | -4.981 | 1.00E-06 |
| Adm           | 11535     | -2.920 | 1.00E-06 |
| Aldh1a2       | 19378     | -7.933 | 1.00E-06 |
| Alpl          | 11647     | 6.011  | 1.00E-06 |
| Alx1          | 216285    | 10.000 | 1.00E-06 |
| Alx3          | 11694     | 6.881  | 1.00E-06 |
| Amer2         | 72125     | 7.479  | 1.00E-06 |
| Angpt2        | 11601     | -4.796 | 1.00E-06 |
| Antxrl        | 239029    | 4.554  | 1.00E-06 |
| Aox3          | 71724     | 4.078  | 1.00E-06 |
| Asb4          | 65255     | 3.420  | 1.00E-06 |
| Asic3         | 171209    | 7.191  | 1.00E-06 |
| Bend7         | 209645    | 4.379  | 1.00E-06 |
| Bmf           | 171543    | 3.021  | 1.00E-06 |
| C920009B18Rik | 606736    | -4.644 | 1.00E-06 |
| Cadm3         | 94332     | 4.540  | 1.00E-06 |
| Cas21         | 69743     | 3.532  | 1.00E-06 |
| Cav3          | 12391     | -7.164 | 1.00E-06 |
| Ccdc114       | 211535    | 2.935  | 1.00E-06 |
| Ccdc88c       | 68339     | 4.401  | 1.00E-06 |
| Cd34          | 12490     | 3.293  | 1.00E-06 |
| Cdh3          | 12560     | 3.903  | 1.00E-06 |
| Col20a1       | 73368     | 3.217  | 1.00E-06 |
| Col27a1       | 373864    | 3.201  | 1.00E-06 |
| Cpa3          | 12873     | -4.115 | 1.00E-06 |
| Crip2         | 68337     | -3.259 | 1.00E-06 |
| Crybg1        | 11630     | 5.198  | 1.00E-06 |
| Cxadr         | 13052     | 3.059  | 1.00E-06 |
| Daam2         | 76441     | 3.320  | 1.00E-06 |
| Dkk1          | 13380     | 6.280  | 1.00E-06 |
| Dlx4          | 13394     | 4.051  | 1.00E-06 |
| Dlx4os        | 320453    | 4.879  | 1.00E-06 |
| Dmrt2         | 226049    | 5.635  | 1.00E-06 |
| Dpysl5        | 65254     | 3.742  | 1.00E-06 |
| Draxin        | 70433     | 6.080  | 1.00E-06 |
| Dusp15        | 252864    | -3.642 | 1.00E-06 |
| Ebf3          | 13593     | 7.350  | 1.00E-06 |
| Eml5          | 319670    | 3.726  | 1.00E-06 |
| Epb41l4a      | 13824     | 3.134  | 1.00E-06 |
| Exph5         | 320051    | 4.282  | 1.00E-06 |
| Fam124a       | 629059    | -3.513 | 1.00E-06 |
| Fam84a        | 105005    | 4.760  | 1.00E-06 |
| Fbn2          | 14119     | 7.342  | 1.00E-06 |
| Fibin         | 67606     | -3.021 | 1.00E-06 |
| Foxl1         | 14241     | -5.431 | 1.00E-06 |
| Frmd4b        | 232288    | 3.495  | 1.00E-06 |
| Frmd5         | 228564    | -3.648 | 1.00E-06 |
| Fstl4         | 320027    | 3.498  | 1.00E-06 |
| Gata4         | 14463     | 4.688  | 1.00E-06 |
| Gatm          | 67092     | 5.338  | 1.00E-06 |
| Gdpd2         | 71584     | 4.812  | 1.00E-06 |
| Glipr1        | 73690     | -5.694 | 1.00E-06 |
| Gm10451       | 100041694 | 6.233  | 1.00E-06 |
| Gm15446       | 100642166 | -8.630 | 1.00E-06 |
| Gm21451       | 100862072 | -8.070 | 1.00E-06 |
| Gm26878       | 102636330 | 6.933  | 1.00E-06 |
| Gm30083       | 102631856 | 4.426  | 1.00E-06 |
| Gm48826       | 115487375 | 4.535  | 1.00E-06 |
| Gprin2        | 432839    | 3.560  | 1.00E-06 |
| Grip1         | 74053     | 6.172  | 1.00E-06 |
| Gstm7         | 68312     | -3.125 | 1.00E-06 |
| Gyg           | 27357     | -3.119 | 1.00E-06 |
| Has2          | 15117     | 4.337  | 1.00E-06 |
| Hopx          | 74318     | 3.097  | 1.00E-06 |
| Hoxb5         | 15413     | -3.105 | 1.00E-06 |
| Hoxb5os       | 75395     | -2.897 | 1.00E-06 |
| Hoxb6         | 15414     | -3.466 | 1.00E-06 |
| Hoxb7         | 15415     | -3.126 | 1.00E-06 |
| Hoxc4         | 15423     | 3.766  | 1.00E-06 |
| Hp            | 15439     | 3.351  | 1.00E-06 |
| Hspb7         | 29818     | -3.383 | 1.00E-06 |
| Htra4         | 330723    | -4.382 | 1.00E-06 |
| Icam1         | 15894     | -2.994 | 1.00E-06 |
| Igfbp4        | 16010     | -3.539 | 1.00E-06 |
| Il6           | 16193     | -3.021 | 1.00E-06 |
| Irx3          | 16373     | 3.832  | 1.00E-06 |
| Isg15         | 100038882 | -4.422 | 1.00E-06 |

|               |           |        |          |
|---------------|-----------|--------|----------|
| Klhdc8a       | 213417    | 3.608  | 1.00E-06 |
| Klhl13        | 67455     | -2.929 | 1.00E-06 |
| Lce3d         | 630994    | 6.248  | 1.00E-06 |
| Lingo1        | 235402    | -3.310 | 1.00E-06 |
| Lpl           | 16956     | 4.148  | 1.00E-06 |
| Ly9           | 17085     | -2.992 | 1.00E-06 |
| Map3k9        | 338372    | 4.079  | 1.00E-06 |
| Mccc1os       | 654424    | 4.106  | 1.00E-06 |
| Mchr1         | 207911    | 3.740  | 1.00E-06 |
| Mgp           | 17313     | -3.967 | 1.00E-06 |
| Mroh2a        | 100040766 | 3.798  | 1.00E-06 |
| Naaladl2      | 635702    | -3.288 | 1.00E-06 |
| Nipal1        | 70701     | -4.694 | 1.00E-06 |
| Npl           | 74091     | 3.886  | 1.00E-06 |
| Oas1a         | 246730    | -3.883 | 1.00E-06 |
| Olfml2a       | 241327    | 4.469  | 1.00E-06 |
| Pcdhga3       | 93711     | -2.946 | 1.00E-06 |
| Pcdhga5       | 93713     | 3.680  | 1.00E-06 |
| Pcdhgb2       | 93700     | -3.478 | 1.00E-06 |
| Pcdhgb5       | 93702     | -3.717 | 1.00E-06 |
| Plce1         | 74055     | 3.237  | 1.00E-06 |
| Plekha6       | 240753    | 4.205  | 1.00E-06 |
| Plin4         | 57435     | -4.109 | 1.00E-06 |
| Ppp1r9a       | 243725    | 3.038  | 1.00E-06 |
| Ptger3        | 19218     | 3.904  | 1.00E-06 |
| Ptpru         | 19273     | 4.473  | 1.00E-06 |
| Qprt          | 67375     | 7.469  | 1.00E-06 |
| Rab3c         | 67295     | 4.806  | 1.00E-06 |
| Rapsn         | 19400     | -3.799 | 1.00E-06 |
| Ryr3          | 20192     | 4.122  | 1.00E-06 |
| Satb1         | 20230     | -3.892 | 1.00E-06 |
| Serpinb6b     | 20708     | -3.967 | 1.00E-06 |
| Serpinb9b     | 20706     | -4.039 | 1.00E-06 |
| Sez6l         | 56747     | 3.917  | 1.00E-06 |
| Sfrp1         | 20377     | 2.940  | 1.00E-06 |
| Sfrp2         | 20319     | 6.558  | 1.00E-06 |
| Sgms2         | 74442     | -3.001 | 1.00E-06 |
| Sgpp2         | 433323    | 6.477  | 1.00E-06 |
| Shisa3        | 330096    | 6.453  | 1.00E-06 |
| Sim2          | 20465     | 7.170  | 1.00E-06 |
| Sncaip        | 67847     | 3.340  | 1.00E-06 |
| Sntg2         | 268534    | 4.295  | 1.00E-06 |
| Sod3          | 20657     | -3.917 | 1.00E-06 |
| Sorl1         | 20660     | 3.154  | 1.00E-06 |
| Sowahd        | 245381    | 4.075  | 1.00E-06 |
| Spata13       | 219140    | 4.071  | 1.00E-06 |
| Stxbp6        | 217517    | 3.828  | 1.00E-06 |
| Svop          | 68666     | -3.097 | 1.00E-06 |
| Syt6          | 54524     | 5.311  | 1.00E-06 |
| Tchh          | 99681     | -3.191 | 1.00E-06 |
| Tenm3         | 23965     | 3.115  | 1.00E-06 |
| Tent5c        | 74645     | 3.430  | 1.00E-06 |
| Thbd          | 21824     | -3.550 | 1.00E-06 |
| Tmem252       | 226040    | 3.103  | 1.00E-06 |
| Tns4          | 217169    | -5.453 | 1.00E-06 |
| Tox           | 252838    | 4.218  | 1.00E-06 |
| Trbc2         | 100125263 | 4.143  | 1.00E-06 |
| Ttc39a        | 230603    | 3.235  | 1.00E-06 |
| Wt1           | 22431     | 3.368  | 1.00E-06 |
| Xlr3a         | 22445     | 6.824  | 1.00E-06 |
| Zfp345        | 545471    | 4.346  | 1.00E-06 |
| Zfp488        | 382867    | 7.752  | 1.00E-06 |
| Dpp6          | 13483     | 3.673  | 1.15E-06 |
| Hoxd9         | 15438     | 6.704  | 1.17E-06 |
| Masp1         | 17174     | -3.200 | 1.47E-06 |
| Cd5l          | 11801     | -5.700 | 1.48E-06 |
| Gm32443       | 102634994 | 3.604  | 1.48E-06 |
| Soga3         | 67412     | 3.852  | 1.48E-06 |
| Dact1         | 59036     | 4.296  | 1.51E-06 |
| Mef2c         | 17260     | -3.682 | 1.59E-06 |
| Rspo2         | 239405    | -3.975 | 1.61E-06 |
| 8430422M14Rik | 109319    | 3.061  | 1.72E-06 |
| Dkk2          | 56811     | -4.803 | 2.51E-06 |
| Egln3         | 112407    | -3.117 | 2.77E-06 |
| Gcnt4         | 218476    | -3.576 | 3.06E-06 |
| Rgs7          | 24012     | 6.443  | 3.27E-06 |
| St8sia1       | 20449     | 6.167  | 3.29E-06 |
| Parvb         | 170736    | -3.735 | 3.34E-06 |
| Ugt1a6a       | 94284     | 3.338  | 3.43E-06 |
| A930003A15Rik | 68162     | 5.823  | 3.60E-06 |
| Ndufa4l2      | 407790    | -7.381 | 3.77E-06 |
| Cd38          | 12494     | 3.000  | 4.41E-06 |
| Nr5a2         | 26424     | 4.350  | 4.44E-06 |
| Wisp2         | 22403     | -3.014 | 4.44E-06 |

|                |           |        |          |
|----------------|-----------|--------|----------|
| 2610016A17Rik  | 100503074 | 5.825  | 4.93E-06 |
| Gsc            | 14836     | 5.924  | 6.19E-06 |
| Pde1c          | 18575     | 3.912  | 6.92E-06 |
| Tram1l1        | 229801    | -3.969 | 7.20E-06 |
| Ctsc           | 13032     | -3.242 | 7.26E-06 |
| Gdf3           | 14562     | -7.629 | 7.47E-06 |
| Isl2           | 104360    | 3.937  | 7.79E-06 |
| Fn3k           | 63828     | 3.373  | 8.27E-06 |
| Ccdc68         | 381175    | -3.388 | 9.27E-06 |
| Trpm5          | 56843     | -3.132 | 9.66E-06 |
| Pcdh19         | 279653    | -3.177 | 1.19E-05 |
| Mirt1          | 381232    | 3.481  | 1.46E-05 |
| Gm7967         | 666182    | 4.913  | 1.95E-05 |
| Lrrtm2         | 107065    | -3.918 | 2.27E-05 |
| Ebf2           | 13592     | 4.172  | 2.28E-05 |
| Gja4           | 14612     | -5.507 | 2.42E-05 |
| Catip          | 241112    | -3.084 | 2.47E-05 |
| Gm13146        | 384087    | 3.729  | 2.57E-05 |
| Pitx2          | 18741     | -3.501 | 2.88E-05 |
| Epha3          | 13837     | -6.406 | 3.39E-05 |
| Gm6020         | 547091    | 3.081  | 3.43E-05 |
| Podxl          | 27205     | 3.361  | 3.44E-05 |
| Acpp           | 56318     | 3.917  | 3.62E-05 |
| Itga2          | 16398     | -3.903 | 3.70E-05 |
| Gm16867        | 100504489 | -6.184 | 3.79E-05 |
| Lpcat2         | 270084    | -3.776 | 3.94E-05 |
| Gm18787        | 100417726 | -4.503 | 4.15E-05 |
| Mfap3l         | 71306     | -3.424 | 4.15E-05 |
| Pi15           | 94227     | -4.215 | 4.76E-05 |
| Tnfrsf9        | 21942     | -6.609 | 5.12E-05 |
| Eepd1          | 67484     | 3.087  | 5.70E-05 |
| Syk            | 20963     | -3.518 | 5.88E-05 |
| Syndig1l       | 627191    | 5.615  | 5.89E-05 |
| Anks1b         | 77531     | -3.994 | 6.35E-05 |
| Ccdc144b       | 241943    | 4.940  | 6.35E-05 |
| Gm26507        | 105246453 | 6.277  | 6.43E-05 |
| Hoxd8          | 15437     | 3.796  | 6.76E-05 |
| Adamtsl3       | 269959    | -3.186 | 6.87E-05 |
| Gm14127        | 668924    | 5.537  | 7.48E-05 |
| 2410018L13Rik  | 69732     | -5.887 | 8.51E-05 |
| Gm19990        | 100503961 | 4.028  | 8.63E-05 |
| Il2rg          | 16186     | -3.273 | 8.64E-05 |
| Myzap          | 102371    | -3.124 | 8.81E-05 |
| Gm7162         | 635617    | 2.971  | 8.88E-05 |
| Eya2           | 14049     | 5.832  | 9.12E-05 |
| Ramp1          | 51801     | 3.096  | 9.12E-05 |
| Tbx20          | 57246     | 5.677  | 9.32E-05 |
| Tppp           | 72948     | 2.929  | 9.65E-05 |
| 4930452B06Rik  | 74430     | -3.560 | 9.96E-05 |
| Gm6093         | 619715    | -4.193 | 1.07E-04 |
| Msx2           | 17702     | -4.529 | 1.10E-04 |
| Alx4           | 11695     | 5.721  | 1.13E-04 |
| Apol9b         | 71898     | -2.968 | 1.16E-04 |
| Gal3st3        | 545276    | 3.614  | 1.16E-04 |
| Shisa2         | 219134    | 3.100  | 1.18E-04 |
| Ttc39aos1      | 102635290 | 3.129  | 1.27E-04 |
| Elobl          | 217066    | -3.145 | 1.30E-04 |
| Kcnh1          | 16510     | 2.920  | 1.40E-04 |
| Lonrf2         | 381338    | -3.590 | 1.40E-04 |
| Slc14a1        | 108052    | -6.113 | 1.50E-04 |
| Art4           | 109978    | -3.434 | 1.65E-04 |
| Grap           | 71520     | -3.154 | 1.93E-04 |
| Klra4          | 16635     | -3.304 | 1.93E-04 |
| P2rx7          | 18439     | -3.386 | 2.35E-04 |
| Unc5c          | 22253     | -4.409 | 2.36E-04 |
| Prl2c2         | 18811     | -5.934 | 2.43E-04 |
| Gm26651        | 102635721 | -5.659 | 2.50E-04 |
| Aqp1           | 11826     | -2.981 | 2.54E-04 |
| Aldh1a3        | 56847     | 3.446  | 2.70E-04 |
| Cadm1          | 54725     | -3.635 | 2.77E-04 |
| Scgb1a1        | 22287     | 6.074  | 3.36E-04 |
| Rhbdl2         | 230726    | -3.625 | 3.41E-04 |
| 9430053O09Rik  | 319723    | 5.601  | 3.58E-04 |
| Gm41192        | 105245801 | 5.021  | 3.65E-04 |
| Gna15          | 14676     | -2.981 | 3.67E-04 |
| Has2os         | 594843    | 4.718  | 4.20E-04 |
| Ccl28          | 56838     | -4.502 | 4.36E-04 |
| Pde6h          | 78600     | -5.348 | 4.36E-04 |
| 9930111J21Rik1 | 667214    | -3.237 | 4.45E-04 |
| Hlf            | 217082    | 3.431  | 4.91E-04 |
| Ush1g          | 16470     | 3.442  | 5.07E-04 |
| Gm6089         | 619645    | 4.016  | 5.21E-04 |
| Platr16        | 102634244 | 5.526  | 5.36E-04 |
| Bdkrb2         | 12062     | -5.230 | 5.77E-04 |

|               |           |        |          |
|---------------|-----------|--------|----------|
| BC039966      | 407793    | 5.633  | 5.83E-04 |
| Gm8170        | 666571    | 3.204  | 5.98E-04 |
| Ppm1j         | 71887     | -2.945 | 6.09E-04 |
| Gpr137c       | 70713     | -3.695 | 6.16E-04 |
| Dact2         | 240025    | 3.052  | 6.20E-04 |
| Gm15987       | 100504591 | -3.841 | 7.36E-04 |
| Gm2762        | 100040421 | -4.635 | 7.52E-04 |
| 4930447C04Rik | 75801     | 3.701  | 7.60E-04 |
| Rimk1a        | 194237    | 3.903  | 7.68E-04 |
| Slc9a2        | 226999    | 3.277  | 8.16E-04 |
| Dscam         | 13508     | 2.905  | 8.25E-04 |
| Gm14066       | 100043792 | -3.765 | 8.26E-04 |
| Tprg          | 71338     | 2.894  | 8.60E-04 |
| Cbln1         | 12404     | 5.171  | 8.86E-04 |
| 9430092D12Rik | 77427     | 5.326  | 8.93E-04 |
| Pirb          | 18733     | -3.133 | 9.04E-04 |
| Zbtb8b        | 215627    | 4.305  | 9.06E-04 |
| Gm867         | 333670    | 5.546  | 9.06E-04 |
| Cyp4b1        | 13120     | 4.884  | 9.23E-04 |
| Pou2f2        | 18987     | -3.902 | 9.29E-04 |
| Scg2          | 20254     | 2.954  | 9.36E-04 |
| Gm3912        | 100042577 | 3.720  | 9.94E-04 |
| Tnfrsf8       | 21949     | -3.382 | 1.04E-03 |
| Krt14         | 16664     | 3.963  | 1.06E-03 |
| Pcolce2       | 76477     | 3.124  | 1.12E-03 |
| Sftpc         | 20389     | 6.093  | 1.13E-03 |
| Tex15         | 104271    | -3.155 | 1.14E-03 |
| Aatk          | 11302     | 2.994  | 1.23E-03 |
| Gad1os        | 68986     | -5.758 | 1.25E-03 |
| Ctnnd2        | 18163     | -2.896 | 1.28E-03 |
| 1500009L16Rik | 69784     | -2.892 | 1.29E-03 |
| Nxpe5         | 381680    | -3.958 | 1.32E-03 |
| Caps2         | 353025    | -4.773 | 1.36E-03 |
| Rtp4          | 67775     | -3.289 | 1.37E-03 |
| Vmn2r79       | 621430    | -6.806 | 1.43E-03 |
| Nlrp5-ps      | 100417675 | -3.559 | 1.44E-03 |
| Gm42031       | 105246807 | 5.407  | 1.58E-03 |
| Akr1b7        | 11997     | 4.269  | 1.60E-03 |
| 6820402A03Rik | 75742     | 3.438  | 1.61E-03 |
| Slamf7        | 75345     | -6.003 | 1.61E-03 |
| Gm26705       | 381967    | -4.453 | 1.66E-03 |
| Trpc4         | 22066     | 3.902  | 1.72E-03 |
| Unc79         | 217843    | 4.977  | 1.76E-03 |
| 2610318N02Rik | 70458     | -3.257 | 1.79E-03 |
| Ntrk2         | 18212     | 5.214  | 1.82E-03 |
| Syt14         | 329324    | -4.006 | 1.82E-03 |
| Ccl20         | 20297     | -4.717 | 1.83E-03 |
| Ism1          | 319909    | -3.235 | 1.85E-03 |
| Slc6a15       | 103098    | -4.622 | 1.95E-03 |
| Mcpt8         | 17231     | -4.444 | 1.95E-03 |
| C2cd4a        | 244911    | 5.092  | 1.98E-03 |
| Eomes         | 13813     | 3.077  | 1.98E-03 |
| Nfatc2        | 18019     | -3.401 | 2.00E-03 |
| C1qa          | 12259     | -4.618 | 2.04E-03 |
| Pcnx2         | 270109    | 3.221  | 2.10E-03 |
| Plch1         | 269437    | 2.935  | 2.19E-03 |
| Myh1          | 17879     | -5.663 | 2.27E-03 |
| Ms4a7         | 109225    | -4.670 | 2.37E-03 |
| Gpr165        | 76206     | -3.974 | 2.44E-03 |
| Lck           | 16818     | 3.316  | 2.52E-03 |
| Ccl12         | 20293     | -4.400 | 2.63E-03 |
| C730027H18Rik | 319572    | 3.793  | 2.66E-03 |
| Gprasp2       | 245607    | 3.000  | 2.66E-03 |
| Gm45925       | 105661729 | 3.266  | 2.70E-03 |
| Sema3g        | 218877    | -3.348 | 2.80E-03 |
| Slc38a4       | 69354     | -3.742 | 2.89E-03 |
| Edar          | 13608     | -4.856 | 2.98E-03 |
| Arg1          | 11846     | -3.573 | 3.03E-03 |
| Slc9b2        | 97086     | -4.041 | 3.07E-03 |
| Tmem156       | 243025    | -3.555 | 3.10E-03 |
| 4833412C05Rik | 73904     | -3.227 | 3.25E-03 |
| Wnt10a        | 22409     | -5.200 | 3.26E-03 |
| Pgf           | 18654     | -3.913 | 3.27E-03 |
| Ppp1r3a       | 140491    | -3.620 | 3.47E-03 |
| Klhl38        | 268807    | -4.675 | 3.66E-03 |
| Traf1         | 22029     | -3.575 | 3.69E-03 |
| Lrrc25        | 211228    | -3.100 | 3.80E-03 |
| Entpd3        | 215446    | 4.263  | 3.84E-03 |
| C1qc          | 12262     | -4.490 | 3.92E-03 |
| Gm19744       | 100503519 | 4.527  | 3.97E-03 |
| Fam107a       | 268709    | 4.053  | 4.24E-03 |
| Gm13238       | 236069    | 3.530  | 4.25E-03 |
| Tmem56        | 99887     | -3.078 | 4.33E-03 |
| Wfdc17        | 100034251 | -2.974 | 4.39E-03 |

|               |           |        |          |
|---------------|-----------|--------|----------|
| Grin2a        | 14811     | -5.086 | 4.45E-03 |
| Krt19         | 16669     | -3.062 | 4.69E-03 |
| Exoc3l2       | 74463     | -4.299 | 5.01E-03 |
| Ctnna2        | 12386     | -3.910 | 5.05E-03 |
| Wnt7a         | 22421     | 3.568  | 5.12E-03 |
| Nap1l2        | 17954     | -3.588 | 5.32E-03 |
| Fhit          | 14198     | -3.576 | 5.64E-03 |
| Rgs5          | 19737     | -5.165 | 5.67E-03 |
| Olfr544       | 257926    | 4.513  | 5.85E-03 |
| Adgrl3        | 319387    | -6.042 | 5.96E-03 |
| Sec14l5       | 665119    | -4.255 | 5.99E-03 |
| 9330198N18Rik | 77516     | 4.585  | 6.15E-03 |
| Gm16574       | 100417422 | 3.280  | 6.16E-03 |
| Nog           | 18121     | -3.431 | 6.54E-03 |
| Cfap44        | 212517    | 3.298  | 6.56E-03 |
| Stk32b        | 64293     | -5.698 | 6.93E-03 |
| Vmo1          | 327956    | -4.727 | 6.94E-03 |
| Marveld3      | 73608     | 4.468  | 6.96E-03 |
| A430108G06Rik | 319650    | -4.496 | 7.04E-03 |
| Ppef1         | 237178    | -4.474 | 7.04E-03 |
| Cthrc1        | 68588     | -5.160 | 7.14E-03 |
| Srcin1        | 56013     | 4.429  | 7.37E-03 |
| Tnfrsf8l2     | 69769     | -3.418 | 7.37E-03 |
| Acox2         | 93732     | 3.447  | 7.38E-03 |
| Clec12a       | 232413    | -2.904 | 7.59E-03 |
| Fcrls         | 80891     | -5.563 | 7.61E-03 |
| Lilra5        | 232801    | -5.198 | 7.68E-03 |
| Galnt14       | 71685     | -5.185 | 7.82E-03 |
| Fpr1          | 14293     | -5.713 | 7.96E-03 |
| Cnr2          | 12802     | -3.300 | 8.14E-03 |
| Il21r         | 60504     | -4.268 | 8.28E-03 |
| Pou3f3        | 18993     | -7.984 | 8.28E-03 |
| Gm10521       | 100038548 | -5.059 | 8.36E-03 |
| Pcdhga11      | 93723     | -3.415 | 8.38E-03 |
| Gm14461       | 329436    | -4.479 | 8.39E-03 |
| Tmed6         | 66269     | 4.046  | 8.45E-03 |
| Dach1         | 13134     | -3.890 | 8.60E-03 |
| Gtf2a1l       | 71828     | 5.037  | 8.82E-03 |
| C1ca3a2       | 80797     | -5.686 | 8.86E-03 |
| Lyz2          | 17105     | -3.682 | 8.88E-03 |
| Gm14866       | 100313945 | 3.652  | 8.96E-03 |
| Cd36          | 12491     | -3.810 | 9.39E-03 |
| H60b          | 667281    | -3.127 | 9.39E-03 |
| Ms4a6d        | 68774     | -3.098 | 9.47E-03 |
| 4930430E12Rik | 71639     | -3.663 | 9.82E-03 |
| Clec4d        | 17474     | -4.017 | 9.89E-03 |
| Chst13        | 71797     | -5.072 | 9.94E-03 |
| Cutal         | 77996     | -4.727 | 9.99E-03 |
| Pla2g7        | 27226     | -4.714 | 1.01E-02 |
| Ddo           | 70503     | -3.823 | 1.02E-02 |
| Tnfrsf15      | 326623    | -4.108 | 1.02E-02 |
| 5430427O19Rik | 71398     | -4.159 | 1.03E-02 |
| Nefm          | 18040     | 3.202  | 1.03E-02 |
| Nudt11        | 58242     | -4.997 | 1.09E-02 |
| C1qb          | 12260     | -4.125 | 1.09E-02 |
| Myh2          | 17882     | -6.173 | 1.10E-02 |
| Ly86          | 17084     | -3.664 | 1.17E-02 |
| A530064D06Rik | 328830    | -5.437 | 1.18E-02 |
| Folh1         | 53320     | -4.182 | 1.23E-02 |
| Foxg1         | 15228     | -3.733 | 1.23E-02 |
| Hsd3b6        | 15497     | -6.034 | 1.23E-02 |
| Gm10644       | 100126034 | 3.312  | 1.23E-02 |
| Gltpd2        | 216871    | -5.095 | 1.24E-02 |
| Adam28        | 13522     | 3.618  | 1.26E-02 |
| Gm649         | 100503482 | -4.675 | 1.28E-02 |
| Susd3         | 66329     | -3.630 | 1.29E-02 |
| Ifi44         | 99899     | -3.234 | 1.32E-02 |
| Rnf208        | 68846     | -5.068 | 1.33E-02 |
| Pira2         | 18725     | -3.155 | 1.33E-02 |
| Ttr           | 22139     | 4.887  | 1.36E-02 |
| Wnt2          | 22413     | -4.436 | 1.37E-02 |
| Ccl8          | 20307     | -4.136 | 1.42E-02 |
| Gm10651       | 100043771 | 3.871  | 1.43E-02 |
| Bst1          | 12182     | -3.034 | 1.43E-02 |
| Csmd1         | 94109     | -3.854 | 1.47E-02 |
| Morrc1        | 17450     | 3.074  | 1.52E-02 |
| Itgb6         | 16420     | -5.003 | 1.54E-02 |
| Gm5431        | 432555    | -3.032 | 1.54E-02 |
| Fam19a1       | 320265    | -4.996 | 1.60E-02 |
| Wt1os         | 329480    | 3.062  | 1.61E-02 |
| Agt           | 11606     | -3.060 | 1.63E-02 |
| Smoc1         | 64075     | -3.220 | 1.66E-02 |
| Gm8153        | 666537    | 4.329  | 1.67E-02 |
| Cd52          | 23833     | -3.198 | 1.79E-02 |

|               |           |        |          |
|---------------|-----------|--------|----------|
| Tshr          | 22095     | -4.101 | 1.79E-02 |
| ltga8         | 241226    | -4.391 | 1.84E-02 |
| Ackr1         | 13349     | 3.107  | 1.85E-02 |
| Sptbn4        | 80297     | -3.254 | 1.90E-02 |
| Dennd1c       | 70785     | -2.997 | 1.93E-02 |
| Lrrn3         | 16981     | -4.274 | 1.96E-02 |
| Gm8108        | 623078    | 4.819  | 2.02E-02 |
| Gm32219       | 102634692 | -3.189 | 2.03E-02 |
| Ifi203-ps     | 100504287 | 3.051  | 2.09E-02 |
| Spr2a3        | 100042514 | 5.445  | 2.14E-02 |
| Npc1l1        | 237636    | 4.372  | 2.15E-02 |
| Nags          | 217214    | 4.830  | 2.15E-02 |
| Rhoh          | 74734     | -2.963 | 2.15E-02 |
| Spp1          | 20750     | -3.034 | 2.21E-02 |
| Hcar2         | 80885     | -4.984 | 2.30E-02 |
| Tm4sf20       | 66261     | 5.000  | 2.32E-02 |
| Gm21917       | 102638921 | -4.792 | 2.41E-02 |
| Ecel1         | 13599     | 3.221  | 2.43E-02 |
| Grin3a        | 242443    | -2.969 | 2.44E-02 |
| Il10ra        | 16154     | -3.127 | 2.47E-02 |
| Ms4a14        | 383435    | -3.107 | 2.48E-02 |
| Agtr1b        | 11608     | -5.446 | 2.51E-02 |
| Hecw1         | 94253     | -3.911 | 2.52E-02 |
| F630028O10Rik | 100038363 | -3.179 | 2.52E-02 |
| Perp          | 64058     | -4.922 | 2.53E-02 |
| Morn5         | 75495     | -4.169 | 2.54E-02 |
| Tfpi2         | 21789     | -3.863 | 2.58E-02 |
| Atp6v0d2      | 242341    | -3.441 | 2.59E-02 |
| Ppp2r2c       | 269643    | -3.957 | 2.59E-02 |
| Cd96          | 84544     | 4.299  | 2.61E-02 |
| Cttnbp2       | 30785     | 3.222  | 2.68E-02 |
| Serpina3c     | 16625     | -3.400 | 2.70E-02 |
| 4930422M22Rik | 73774     | 5.214  | 2.75E-02 |
| Prtn3         | 19152     | 3.322  | 2.75E-02 |
| Il1rl1        | 17082     | -3.434 | 2.78E-02 |
| Ms4a6b        | 69774     | -3.532 | 2.80E-02 |
| Rorb          | 225998    | -4.202 | 2.81E-02 |
| Vmn1r40       | 113855    | -3.352 | 2.82E-02 |
| Dnajb3        | 15504     | -4.110 | 2.85E-02 |
| Cd200         | 17470     | -3.028 | 2.88E-02 |
| Ms4a6c        | 73656     | -4.072 | 2.88E-02 |
| Gm10020       | 100039748 | 4.014  | 2.90E-02 |
| Adam3         | 11497     | -3.161 | 3.06E-02 |
| Ctss          | 13040     | -3.609 | 3.08E-02 |
| Olfr1309      | 258439    | -4.956 | 3.22E-02 |
| Platr27       | 78316     | -4.643 | 3.29E-02 |
| Irx3os        | 319388    | 2.991  | 3.29E-02 |
| Gm6044        | 595140    | 3.863  | 3.33E-02 |
| Cxcr4         | 12767     | -3.023 | 3.35E-02 |
| Gm7269        | 639527    | -3.516 | 3.36E-02 |
| Fcgr2b        | 14130     | -3.288 | 3.38E-02 |
| 3830403N18Rik | 70691     | -4.796 | 3.42E-02 |
| Cd164l2       | 69655     | -4.205 | 3.45E-02 |
| Gm8307        | 666819    | -4.407 | 3.45E-02 |
| Car2          | 12349     | -5.486 | 3.46E-02 |
| 1700012B09Rik | 69325     | -5.119 | 3.48E-02 |
| Mog           | 17441     | 3.604  | 3.52E-02 |
| Lancl3        | 236285    | -3.020 | 3.54E-02 |
| Csprs         | 114564    | 4.086  | 3.64E-02 |
| Egr4          | 13656     | 4.879  | 3.66E-02 |
| Plppr5        | 75769     | -3.807 | 3.68E-02 |
| Akr1c13       | 27384     | -3.904 | 3.71E-02 |
| Prokr2        | 246313    | 3.914  | 3.75E-02 |
| Nalcn         | 338370    | -4.378 | 3.79E-02 |
| Mdga2         | 320772    | -4.504 | 3.79E-02 |
| Dnaic1        | 68922     | -4.100 | 3.98E-02 |
| Marchf11      | 211147    | -4.391 | 3.99E-02 |
| Erg           | 13876     | -3.162 | 4.06E-02 |
| Gfra2         | 14586     | -3.830 | 4.20E-02 |
| Tbx1          | 21380     | -9.079 | 4.21E-02 |
| Gpr65         | 14744     | -3.301 | 4.25E-02 |
| Lce3c         | 94060     | 4.883  | 4.30E-02 |
| Large2        | 228366    | 2.927  | 4.35E-02 |
| Gap43         | 14432     | -3.183 | 4.47E-02 |
| Gm10471       | 100039045 | 4.413  | 4.53E-02 |
| Ccdc36        | 434438    | -5.069 | 4.59E-02 |
| Nmur1         | 14767     | -3.449 | 4.61E-02 |
| Gm7592        | 101055758 | 3.919  | 4.62E-02 |
| Ube2ql1       | 76980     | -4.298 | 4.68E-02 |
| Gm14963       | 105246847 | -3.126 | 4.70E-02 |
| 1500015O10Rik | 78896     | -3.393 | 4.92E-02 |
| P2ry14        | 140795    | -5.785 | 4.94E-02 |
| Fcgr3         | 14131     | -3.071 | 4.94E-02 |



**Supp. Table S6:** Drugs targeting hub genes. The data was acquired using the DrugBank Online (<https://go.drugbank.com/>).

| target | drug       | drugbank ID                                | group                                                     | pharmacological action? | actions               |
|--------|------------|--------------------------------------------|-----------------------------------------------------------|-------------------------|-----------------------|
| Bdkrb2 | DB05038    | Anatibant                                  | investigational                                           | unknown                 | antagonist            |
| Bdkrb2 | DB06196    | Icatibant                                  | approved, investigational                                 | yes                     | antagonist            |
| Bdkrb2 | DB06549    | Labradimil                                 | investigational                                           | unknown                 | agonist               |
| Ccl28  | no results |                                            |                                                           |                         |                       |
| Cd20   | DB00078    | Ibritumomab tiuxetan                       | approved, investigational                                 | yes                     | antibody              |
| Cd20   | DB08935    | Obinutuzumab                               | approved, investigational                                 | yes                     | antibody              |
| Cd20   | DB11988    | Ocrelizumab                                | approved, investigational                                 | yes                     | antagonist / antibody |
| Cd20   | DB06650    | Ofatumumab                                 | approved                                                  | yes                     | antibody              |
| Cd20   | DB00073    | Rituximab                                  | approved                                                  | yes                     | antibody              |
| Cd20   | DB09336    | Technetium Tc-99m<br>nofetumomab merpentan | approved, withdrawn                                       | yes                     | binder                |
| Cd20   | DB00081    | Tositumomab                                | approved, investigational                                 | yes                     | antibody              |
| Cnr2   | DB09061    | Cannabidiol                                | approved, investigational                                 | unknown                 | antagonist            |
| Cnr2   | DB00470    | Dronabinol                                 | approved, illicit                                         | unknown                 | agonist               |
| Cnr2   | DB06202    | Lasoflofen                                 | approved, investigational                                 | unknown                 | inverse agonist       |
| Cnr2   | DB14009    | Medical Cannabis                           | experimental, investigational                             | unknown                 |                       |
| Cnr2   | DB00486    | Nabilone                                   | approved, investigational                                 | yes                     | partial agonist       |
| Cnr2   | DB14011    | Nabiximols                                 | investigational                                           | yes                     |                       |
| Cnr2   | DB02955    | Ricinoleic acid                            | experimental                                              | unknown                 |                       |
| Cnr2   | DB11755    | Tetrahydrocannabivarin                     | investigational                                           | unknown                 | partial agonist       |
| Cxcr4  | DB05501    | AMD-070                                    | investigational                                           | unknown                 |                       |
| Cxcr4  | DB00452    | Framycetin                                 | approved                                                  | unknown                 | antagonist            |
| Cxcr4  | DB12698    | Ibalizumab                                 | approved, investigational                                 | unknown                 | antagonist            |
| Cxcr4  | DB06809    | Plerixafor                                 | approved                                                  | yes                     | antagonist            |
| Frp1   | DB00716    | Nedocromil                                 | approved, investigational                                 | unknown                 | antagonist            |
| Gna15  | no results |                                            |                                                           |                         |                       |
| Hcar2  | DB00257    | Clotrimazole                               | approved, vet approved                                    | unknown                 | partial agonist       |
| Hcar2  | DB08949    | Inositol nicotinate                        | approved, withdrawn                                       | yes                     | agonist               |
| Hcar2  | DB00627    | Niacin                                     | approved, investigational, nutraceutical                  | yes                     | agonist               |
| Mchr1  | DB00502    | Haloperidol                                | approved                                                  | unknown                 |                       |
| Nmur1  | no results |                                            |                                                           |                         |                       |
| P2ry14 | DB01069    | Promethazine                               | approved, investigational                                 | unknown                 | inhibitor             |
| Ptger3 | DB00905    | Bimatoprost                                | approved, investigational                                 | yes                     | agonist               |
| Ptger3 | DB11113    | Castor oil                                 | approved, investigational, nutraceutical,<br>vet approved | yes                     | agonist / activator   |
| Ptger3 | DB00917    | Dinoprostone                               | approved                                                  | yes                     | agonist               |
| Ptger3 | DB08964    | Gemeprost                                  | approved, withdrawn                                       | yes                     | agonist               |
| Ptger3 | DB09211    | Limaprost                                  | investigational                                           | unknown                 | agonist               |
| Ptger3 | DB00929    | Misoprostol                                | approved                                                  | yes                     | agonist               |

**Figure S1: AGE-RAGE signaling pathway in diabetic complications. (A)** DEGs in hIGFBP5 fibroblasts that belong to this pathway. **(B)** KEGG pathway showing the logFC of DEGs in (A). Red: upregulated, blue: downregulated, yellow arrow and box highlight biological outcomes.

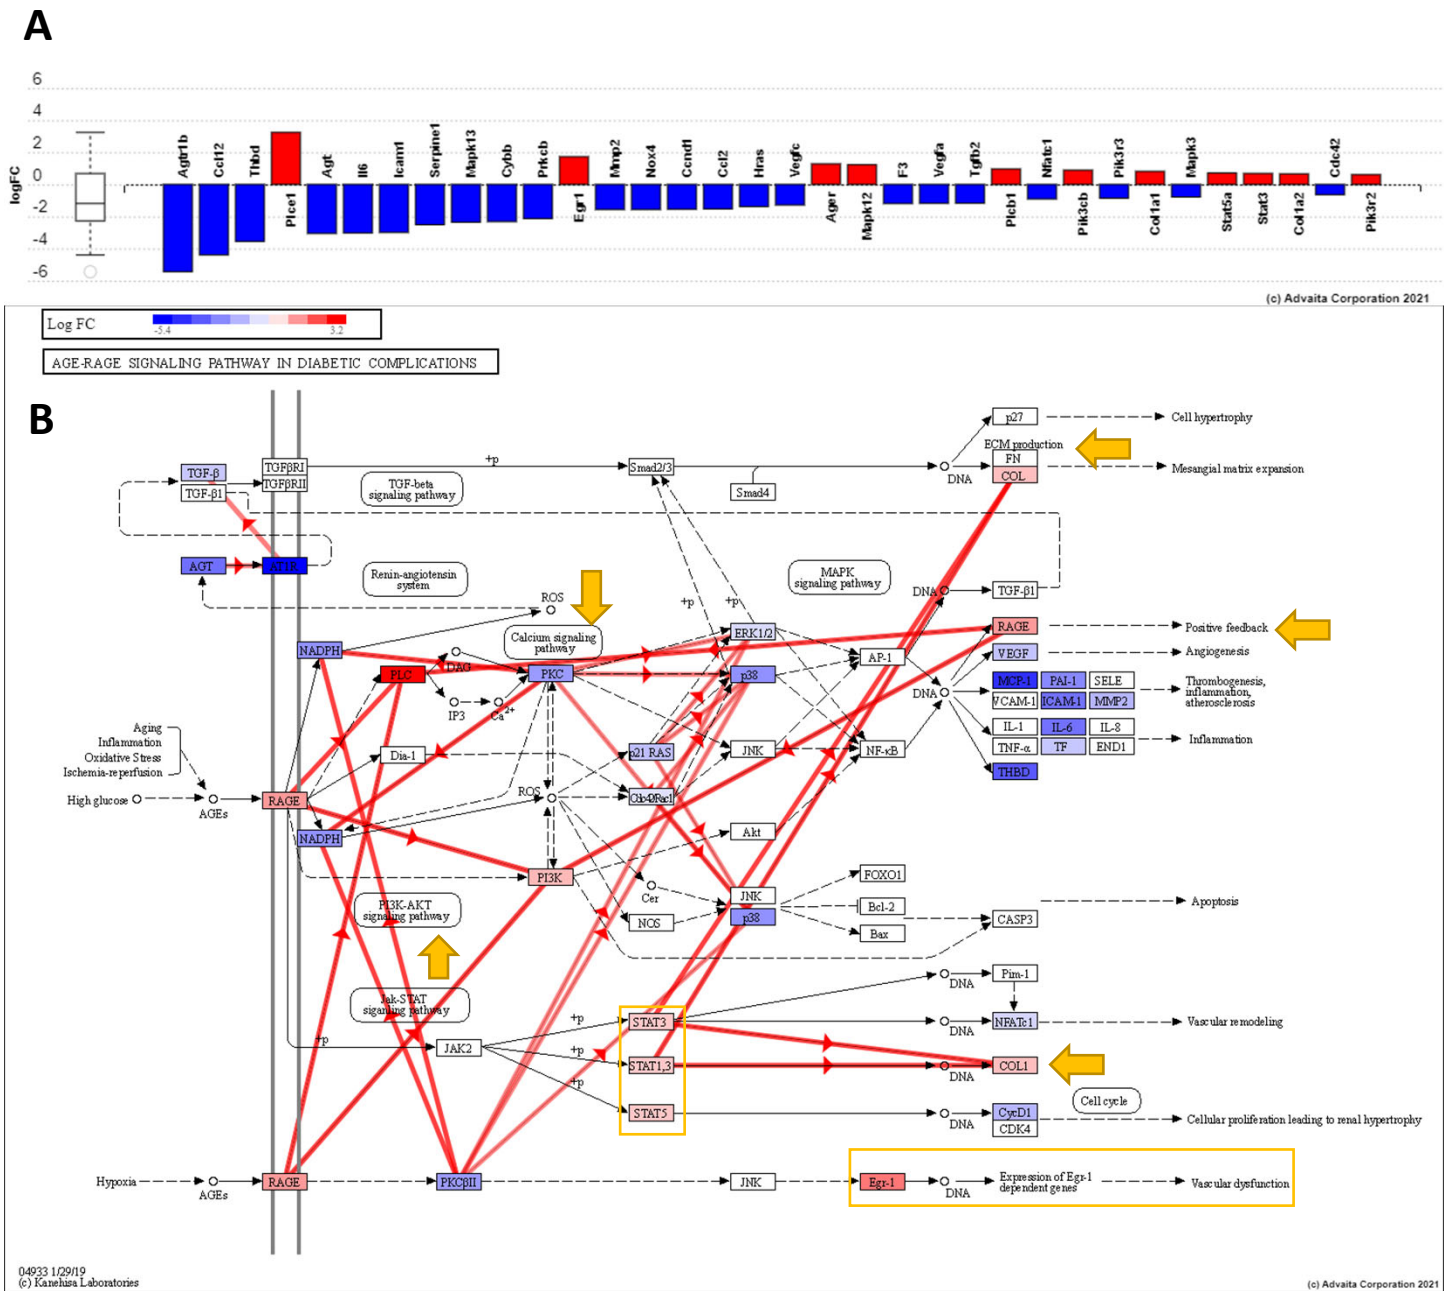

**Figure S2: ECM receptor interaction. (A)** DEGs in hIGFBP5 fibroblasts that belong to this pathway. **(B)** KEGG pathway showing the logFC of DEGs in (A). Red: upregulated, blue: downregulated.

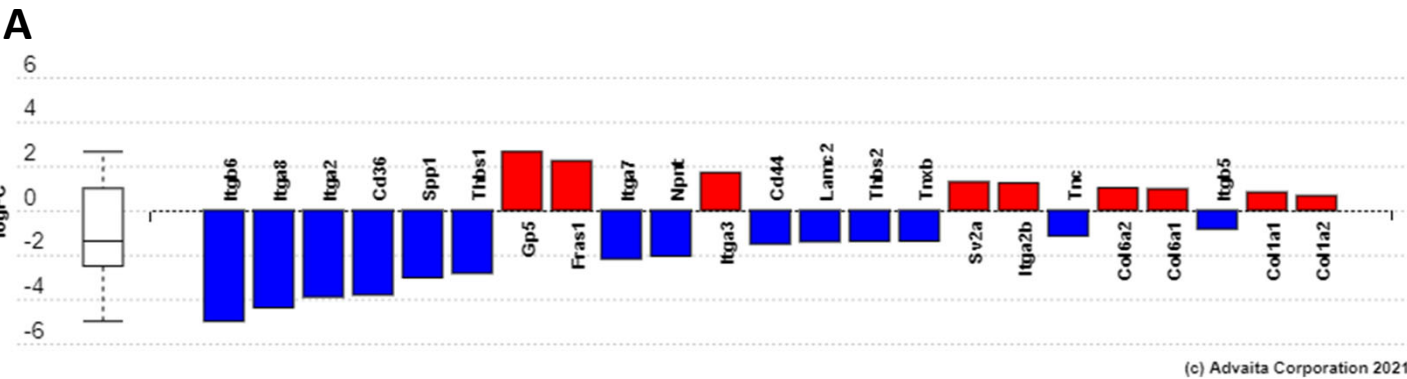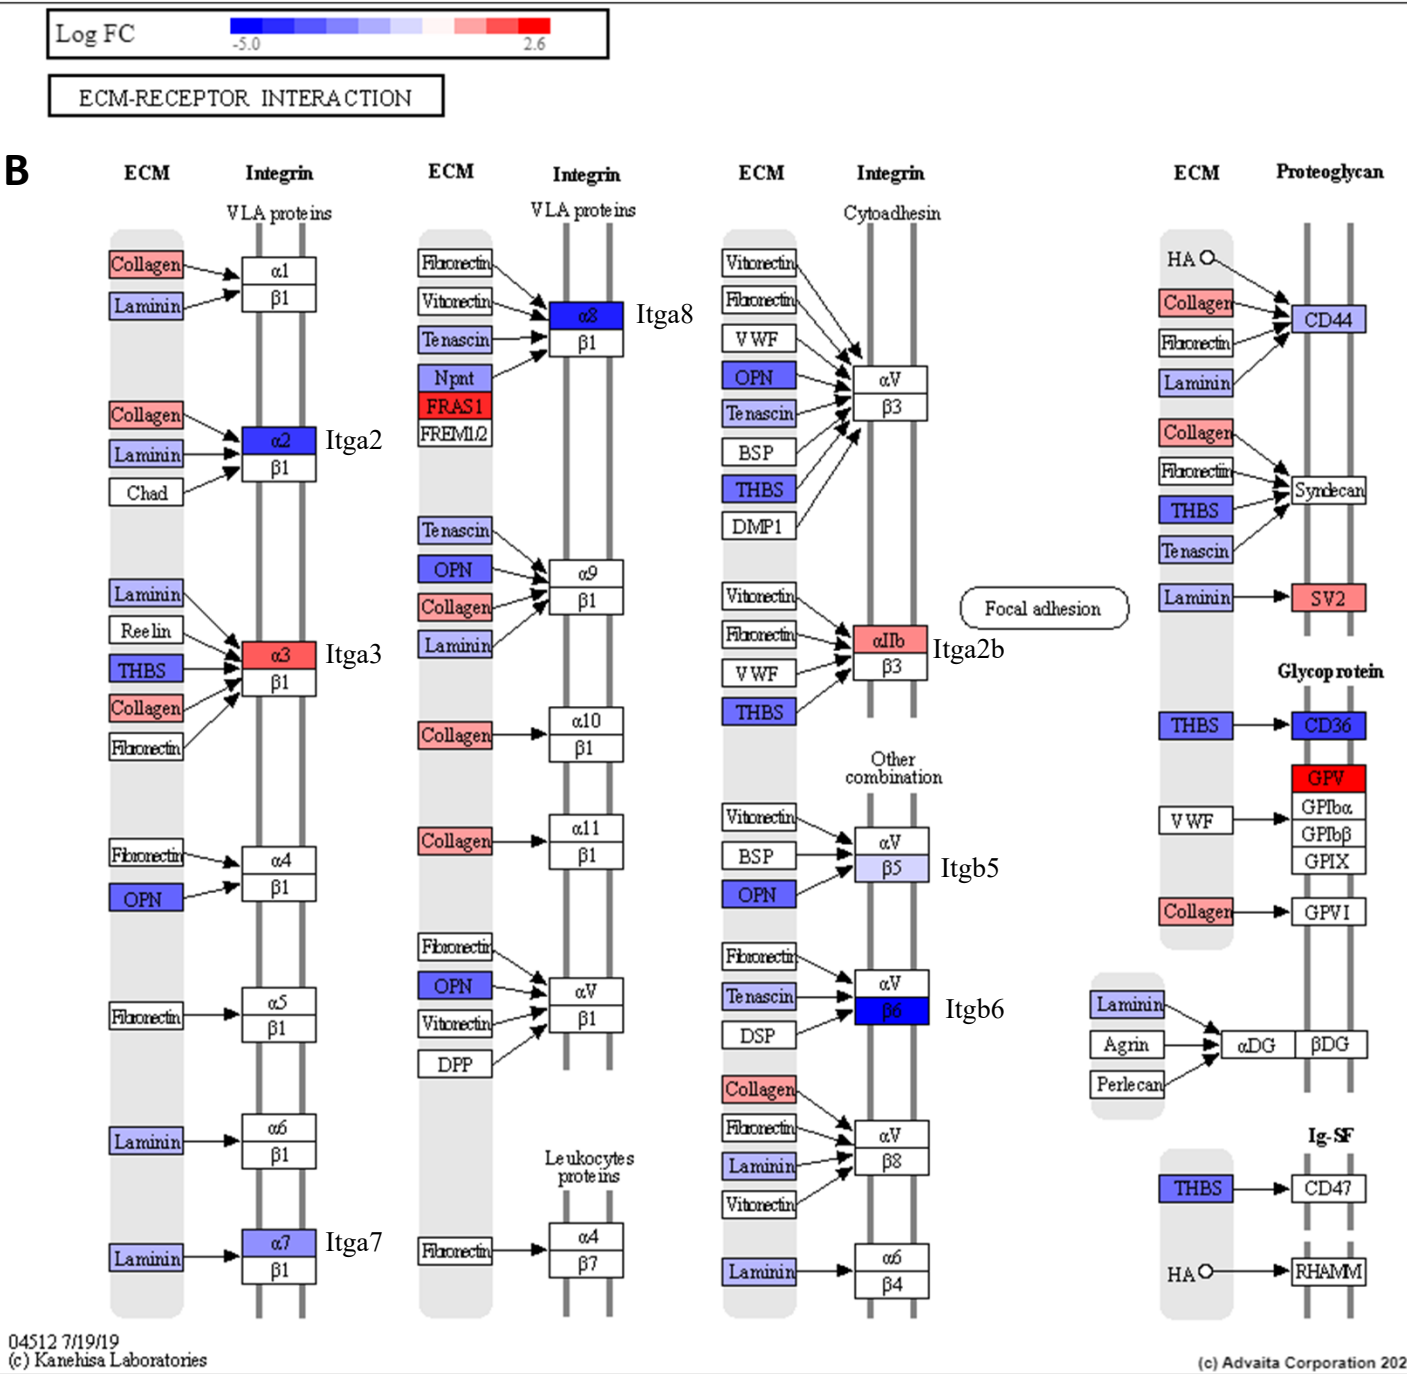

**Figure S3: Focal adhesion.** (A) DEGs in hIGFBP5 fibroblasts that belong to this pathway. (B) KEGG pathway showing the predicted perturbation of the transcriptomic signature in (A) in hIGFBP5 fibroblasts. Red: upregulated, blue: downregulated, yellow arrow and box highlight biological outcomes.

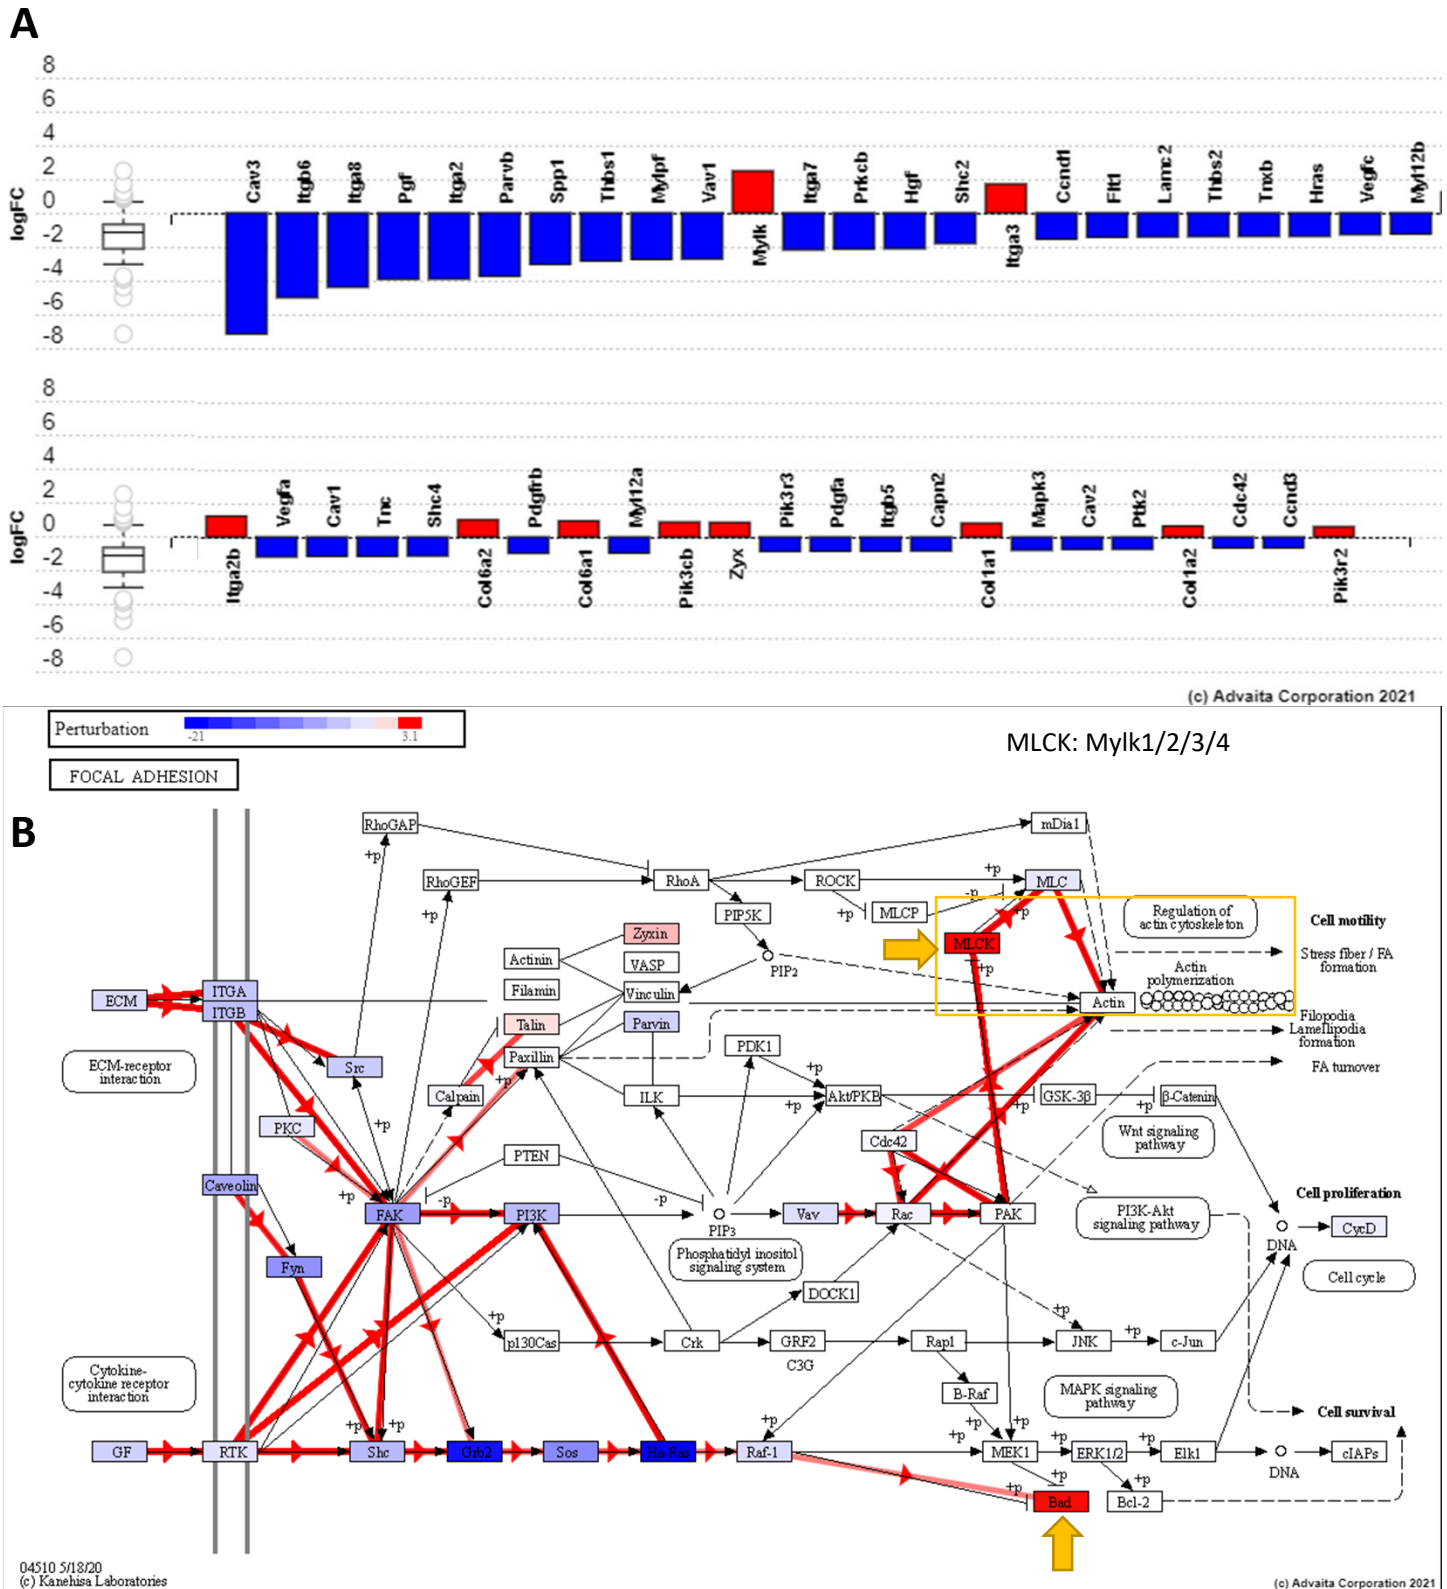

# A

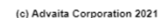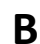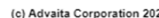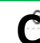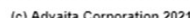



**A**

logFC

Legend:

- Upregulated cytokines \*
- Downregulated Cytokines \*
- Bars without stars denote receptors

**B**

logFC

Figure 2 displays two bar charts, A and B, showing the log2 fold change (logFC) of various cytokines and chemokines in the spleen. Chart A shows upregulated cytokines (red bars) and downregulated cytokines (blue bars). Chart B shows upregulated cytokines (red bars) and downregulated cytokines (blue bars). A legend indicates that red bars represent upregulated cytokines, blue bars represent downregulated cytokines, and bars without stars denote receptors. Box plots on the left of each chart show the distribution of logFC values.

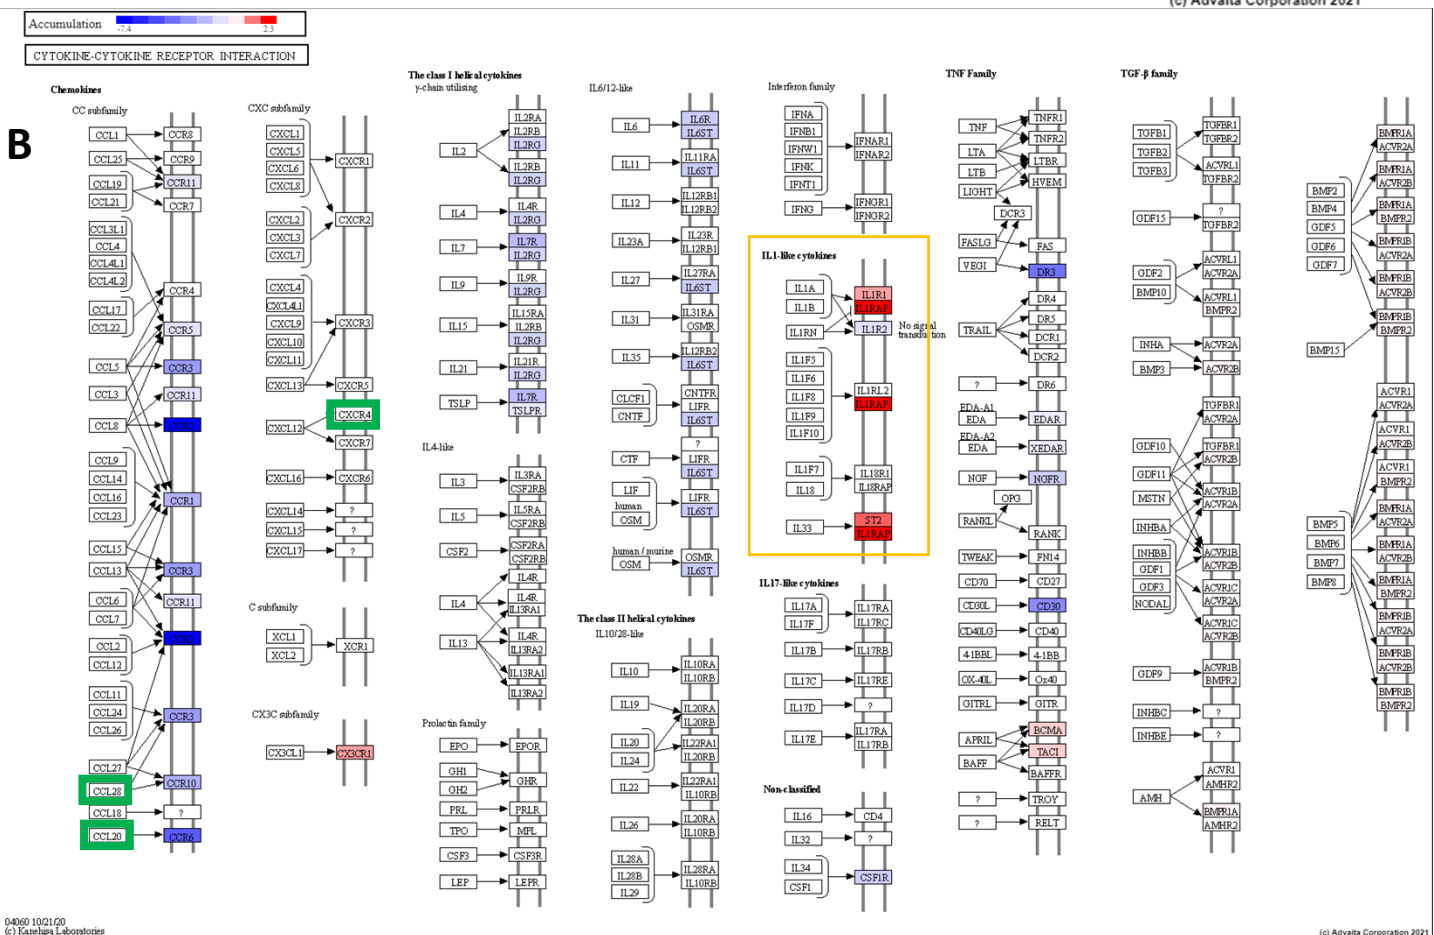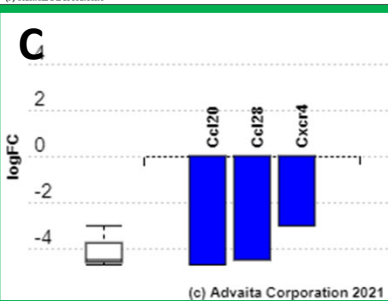

**Figure S6: PI3K-Akt signaling pathway. (A)** DEGs in hIGFBP5 fibroblasts that belong to this pathway. **(B)** KEGG pathway showing the predicted accumulation of the transcriptomic signature in (A) in hIGFBP5 fibroblasts. Red: upregulated, blue: downregulated, yellow arrow and box highlight major ligand/receptor interactions enriched in this pathway and biological outcomes.

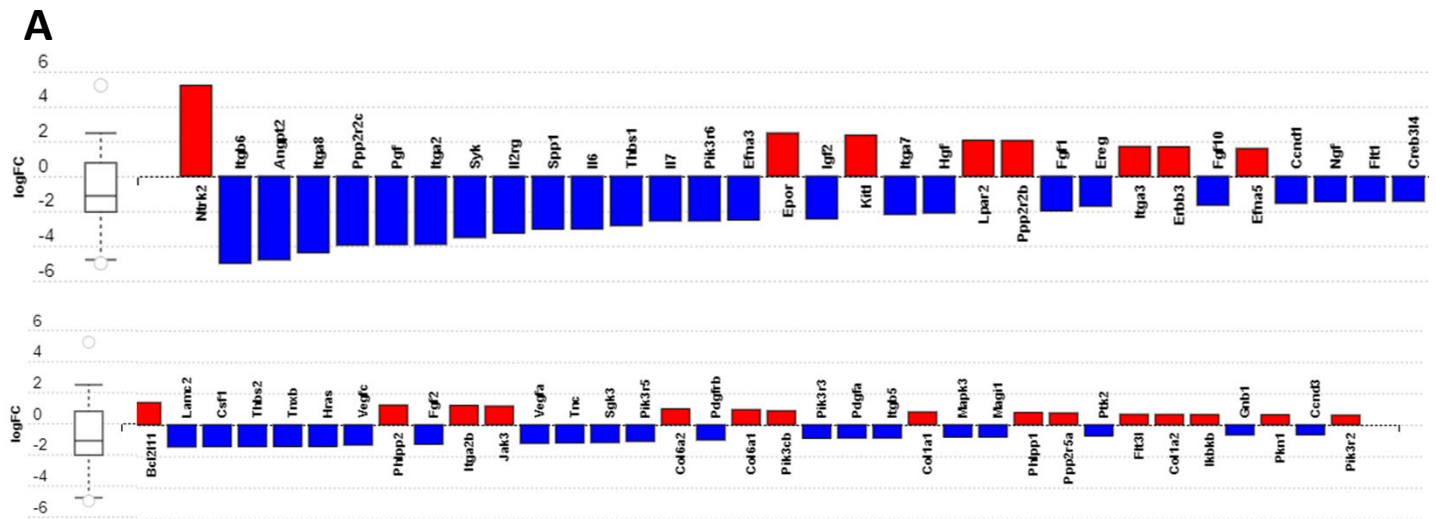

(c) Advaita Corporation 2021

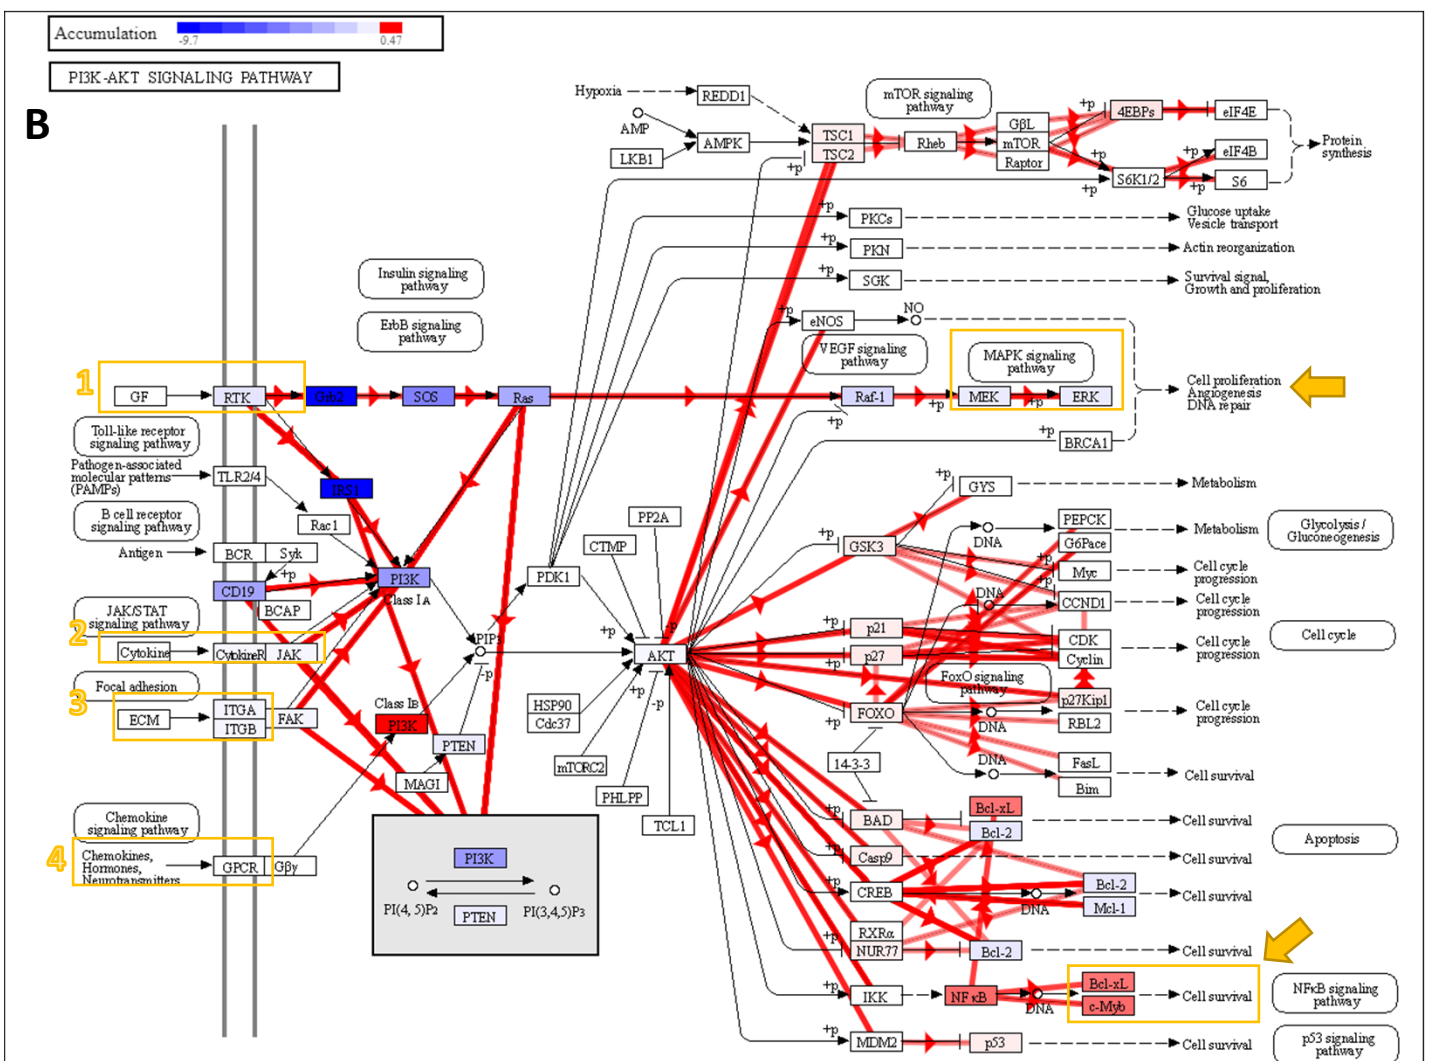

**Figure S7: Chemokine signaling pathway. (A)** DEGs in hIGFBP5 fibroblasts that belong to this pathway. **(B)** KEGG pathway showing the predicted perturbation of the transcriptomic signature in (A) in hIGFBP5 fibroblasts. Red: upregulated, blue: downregulated, green: hub gene(s). **(C)** Barplot of the logFC of hub gene(s).

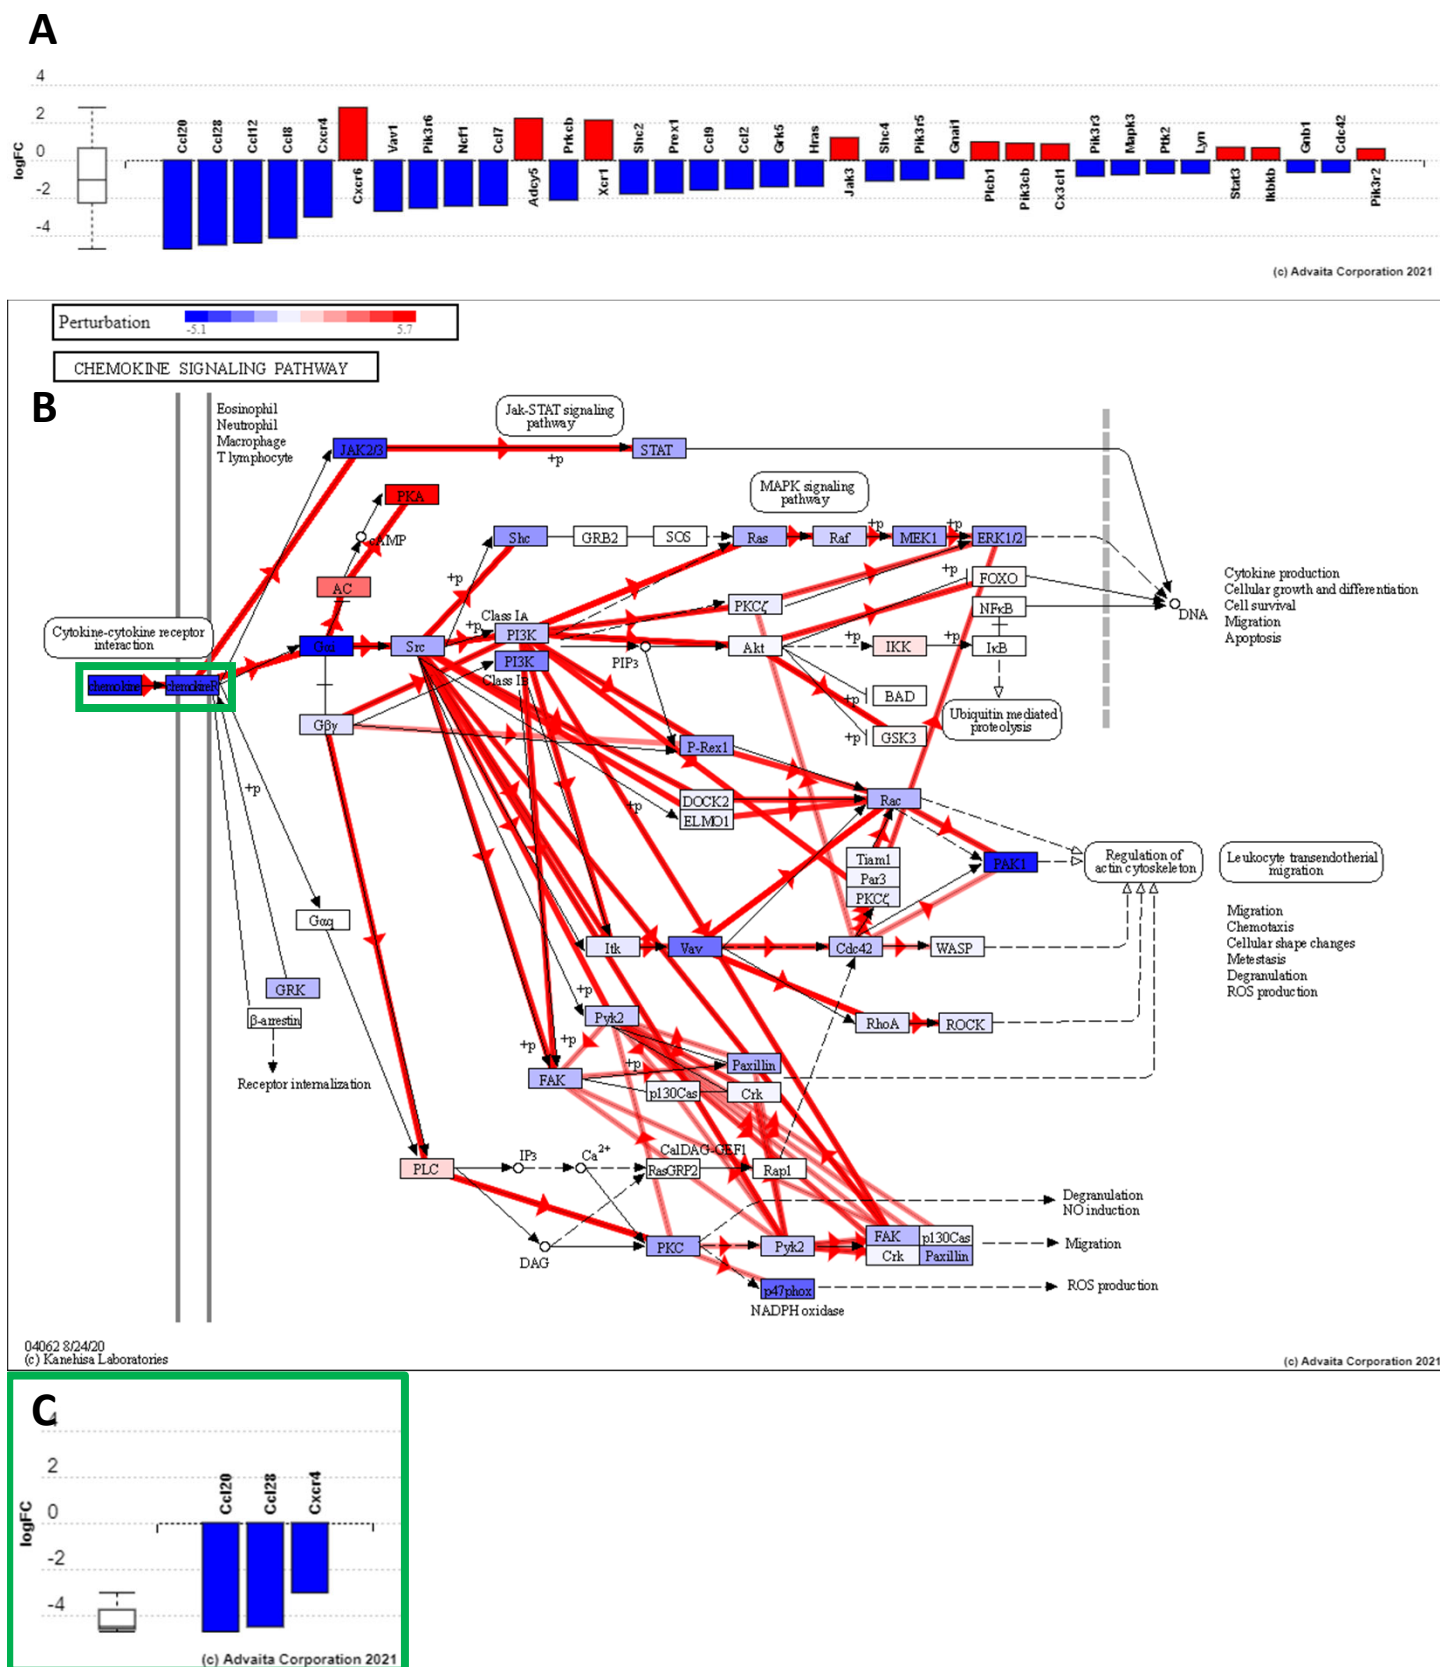



**A**

Box plot showing the distribution of gene expression levels for 42 genes. The y-axis ranges from -6 to 6. The x-axis lists genes: NRX2, ANGPT2, PIGF, MIF2C, SCN5P1, CCRN1, ESRB3, SLC7, MAPK13, HIF1, PRKCB, IGF1, PRK2, TRIP, RPS24K, ESRB2, FGF10, FOS, PI3K, PRKAB, CACD1G, DUSP6, NGF, FGF, FGF, CCL1, FOS, RPS24K, CACN1A, CACN1, FGF2, FGF2, ACCN, MAPK12, RPS24K, VEGFA, VEGF, MAPK6, CACN1, CACN1, CACN1, MAPK8, IL1RN, IL1RN, MAPK6, RPS, MAPK3, MAPK1, MYD88, NGF, RPS24K, MAPK3, TRAF6, FGF2, MAPK6, CACN1.

(c) AdvaLife Corporation 2022

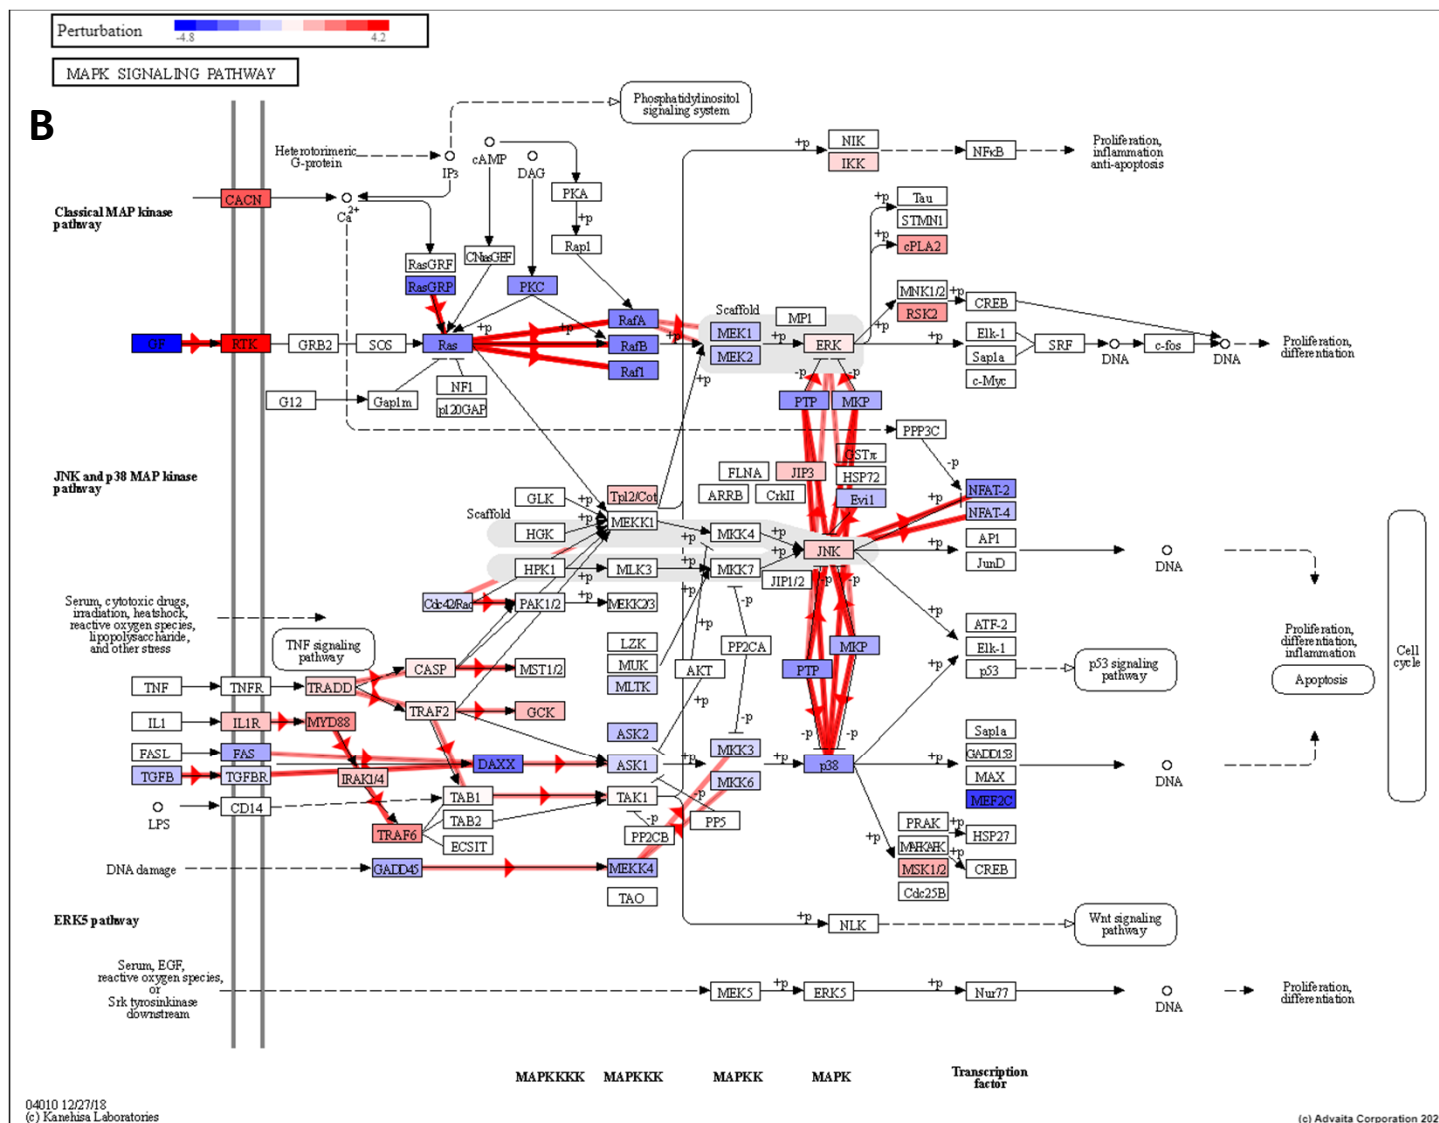

**A**

| Gene    | log2FC (approx.) |
|---------|------------------|
| Agtr1b  | -5.8             |
| Bdnf2   | -5.8             |
| Gria2a  | -5.8             |
| Ryr3    | 3.5              |
| Pde1c   | 3.2              |
| Ptger3  | 3.2              |
| Pzrx7   | -4.5             |
| Plec1   | 2.5              |
| Cxcr4   | -4.5             |
| Cd38    | -4.5             |
| Gna15   | 2.2              |
| Gacnati | 2.2              |
| Mylk    | 1.8              |
| Pdgfr   | -4.2             |
| Prlcb   | -4.2             |
| Hrh1    | -4.2             |
| Hr2a    | -4.2             |
| Adra1d  | -4.2             |
| Erb3    | 1.2              |
| Adra1b  | -3.5             |
| Tnfr1   | -3.5             |
| Adrb2   | -3.5             |
| Cacna1a | -3.5             |
| Adora2b | -3.5             |
| Itpr3   | 0.8              |
| Cacna1c | 0.5              |
| Pdgfrb  | -1.5             |
| Prlcb1  | 0.5              |
| Oral3   | -2.5             |
| Pdgfra  | -2.5             |
| Oral1   | -2.5             |
| Alp2b1  | -2.5             |
| Gna11   | -2.5             |
| Camk2d  | -1.5             |

[illegible]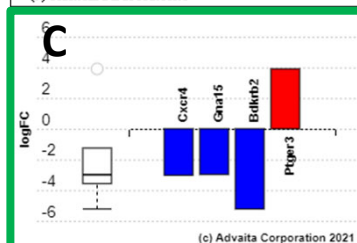

**Figure S10: Neuroactive ligand-receptor interaction. (A)** DEGs in hIGFBP5 fibroblasts that belong to this pathway. **(B)** KEGG pathway showing the logFC of DEGs in (A). Red: upregulated, blue: downregulated, yellow boxes highlight type of ligands, green: hub gene(s). **(C)** Barplot of the logFC of hub gene(s).

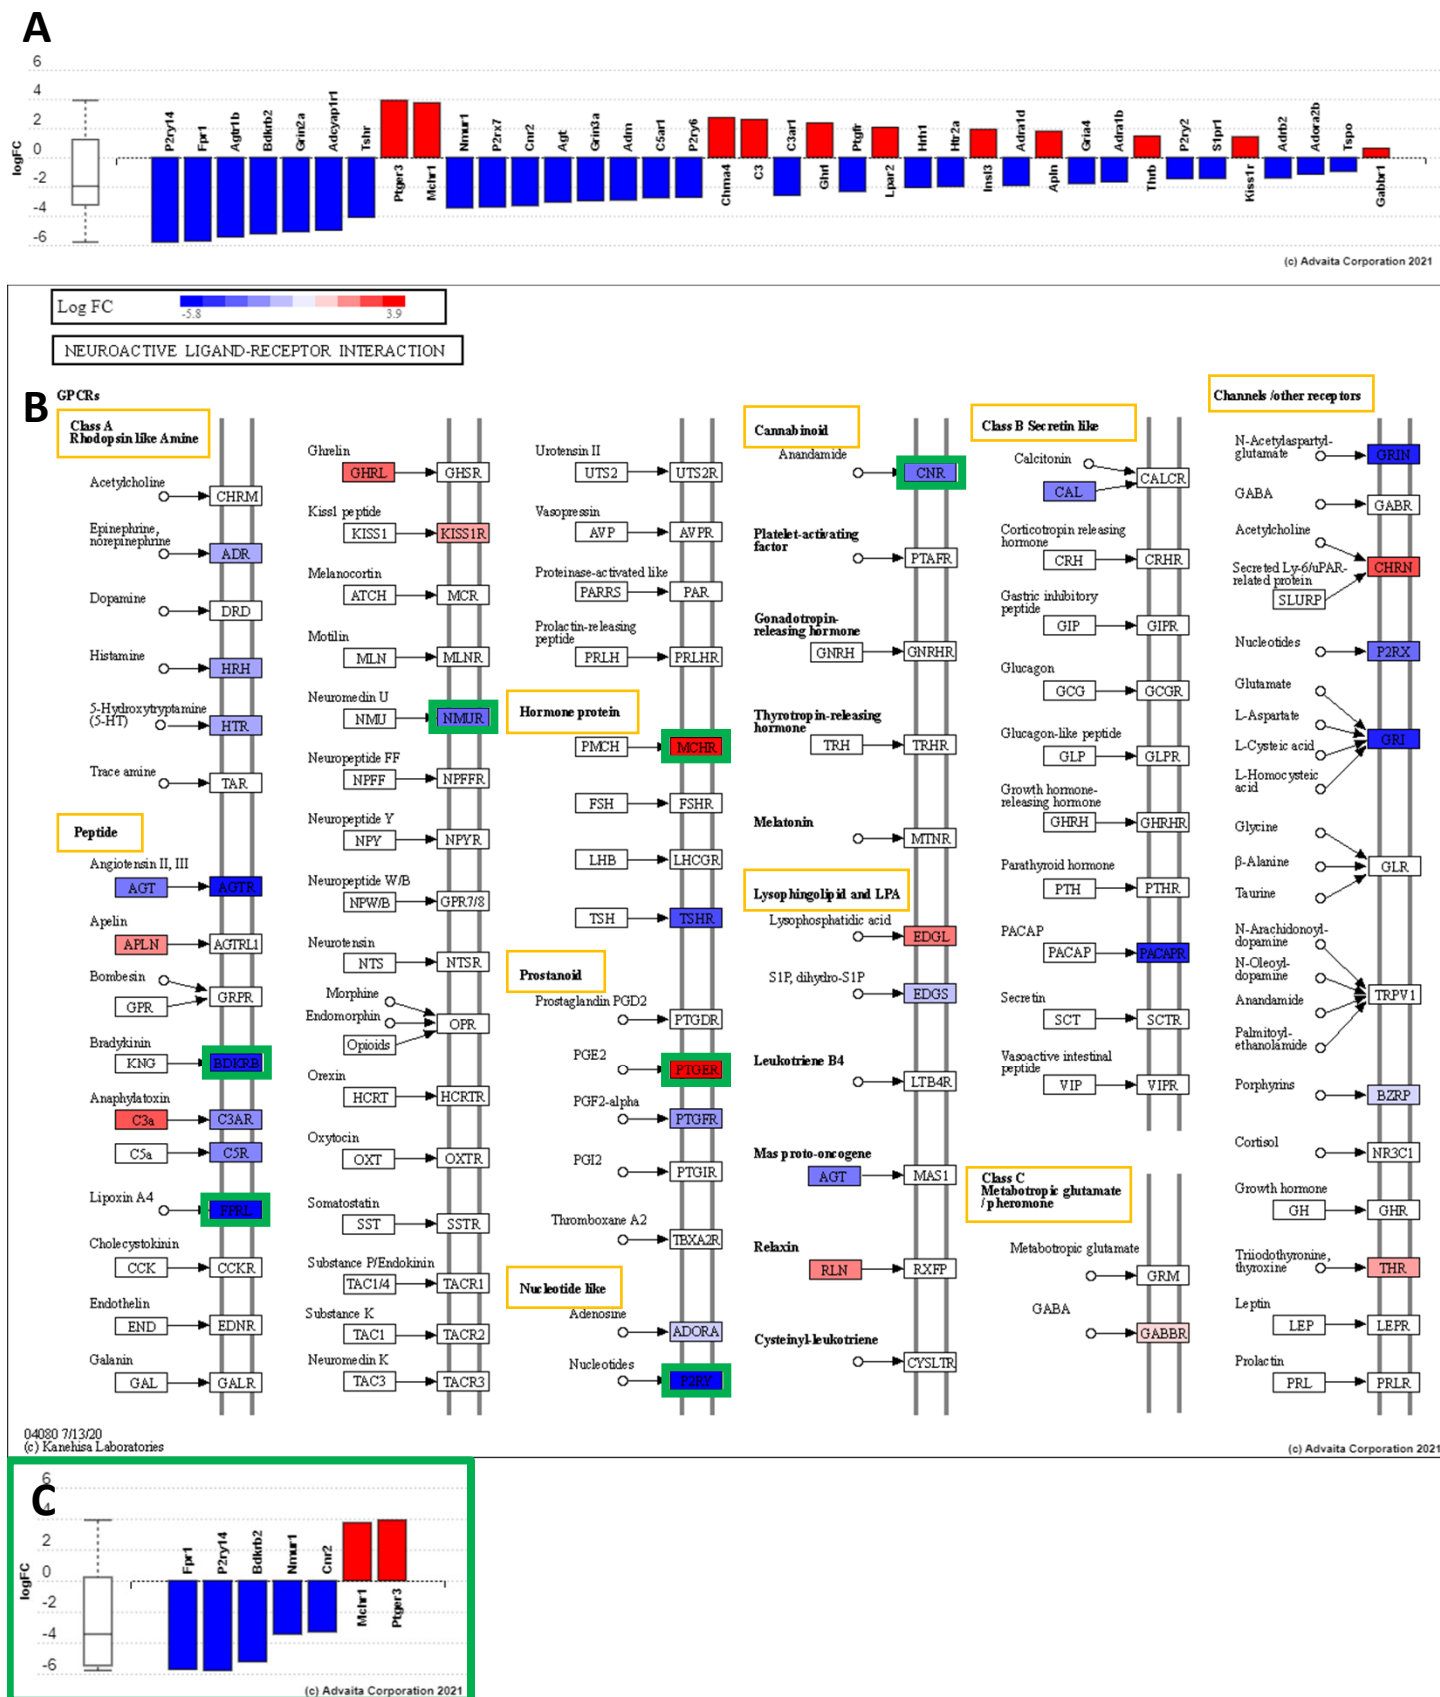

**Figure S11: Impact of hIGFBP5 on the mRNA levels of genes of interest in pFBs.** Expression levels of genes of interest were quantified by qRT-PCR and normalized to female WT for (A) *Col27a1*, (B) *Pcolc2*, (C) *Bdkrb2*, (D) *Cav3*, (E) *Spp1*, (F) *Nmur1* and (G) *Il6*. N= 3 per group. The housekeeping gene used to normalize the data was B2m. \*P < 0.05. \*\*P < 0.01. \*\*\*P < 0.001. \*\*\*\*P < 0.0001. ns: not significant. F: female (in purple), M: male (in green), WT: wild type, HOMO: hIGFBP5 homozygous mice.

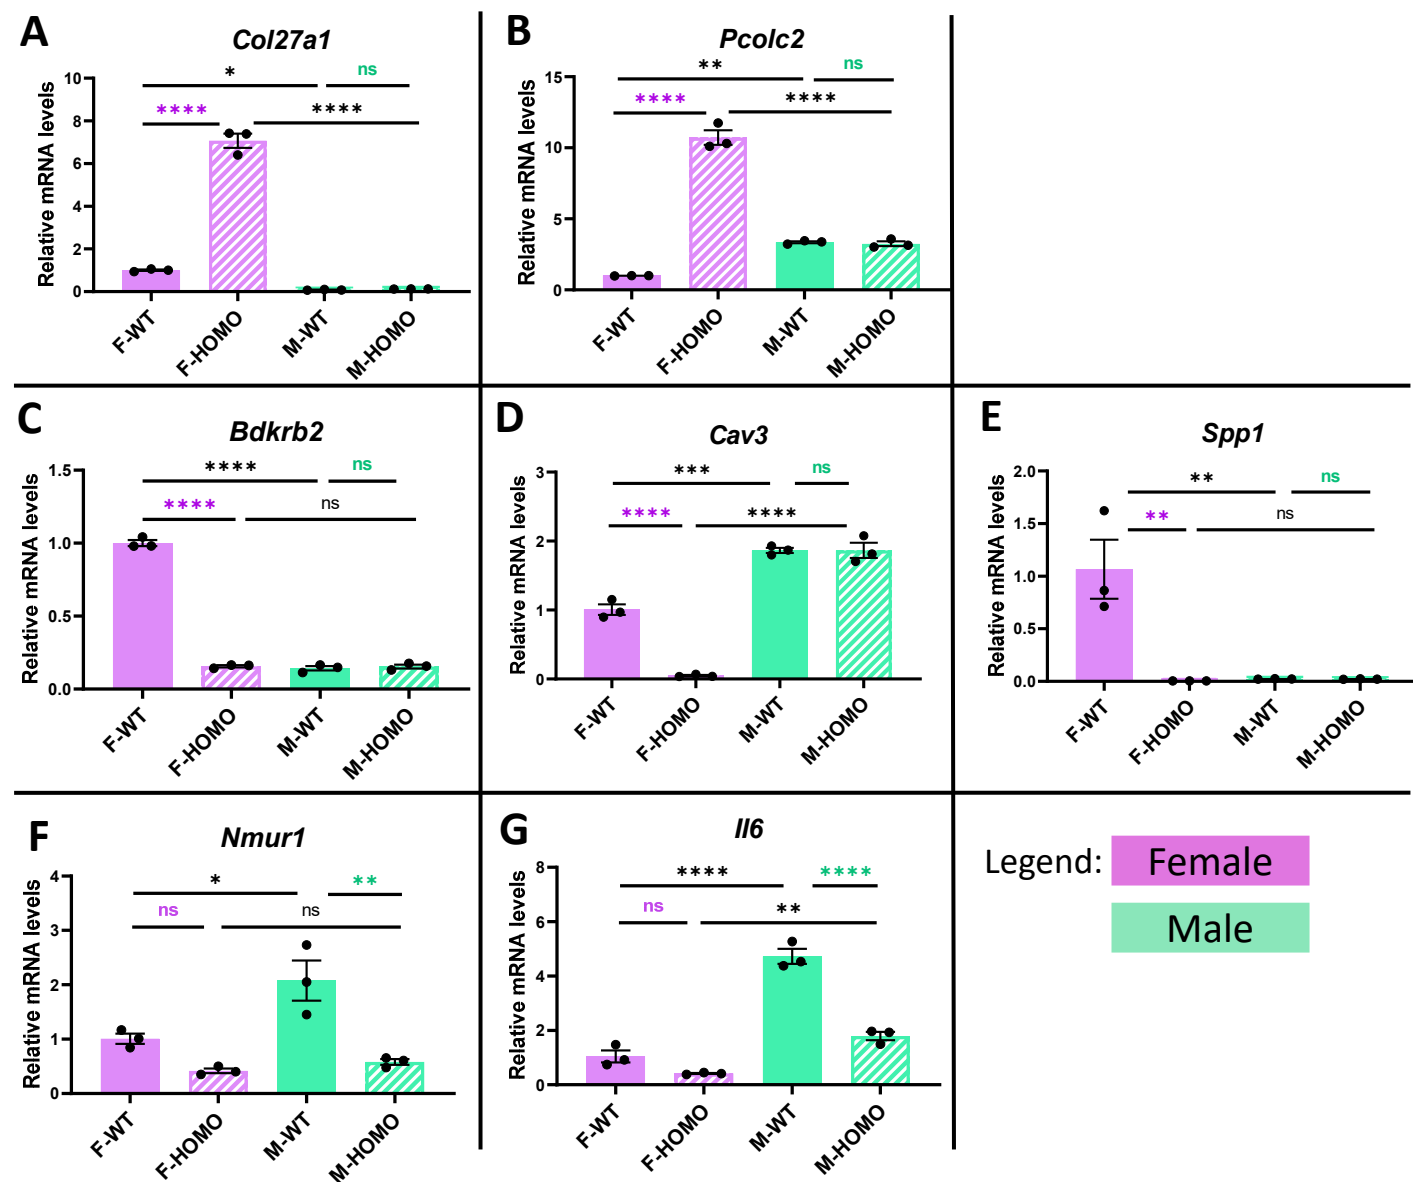

**Figure S12: Effect of hIGFBP5 on Intracellular Protein Abundance.** Cell lysates were analyzed by immunoblotting for selected proteins. Quantification of immunoblots (n=3) for the protein abundance of **(A)** Nmur1, **(B)** Bdkrb2, **(C)** Serpine1, **(D)** Fpr1 and **(E)** Tbx1 was performed, and the results were normalized to female WT. The housekeeping protein used as loading control was  $\beta$ -actin. \*P < 0.05. \*\*P < 0.01. \*\*\*P < 0.001. ns: not significant. F: female (in purple), M: male (in green), WT: wild type, HOMO: hIGFBP5 homozygous mice. **(F)** Representative immunoblots for each protein shown in panels A-E and  $\beta$ -actin, as a loading control.

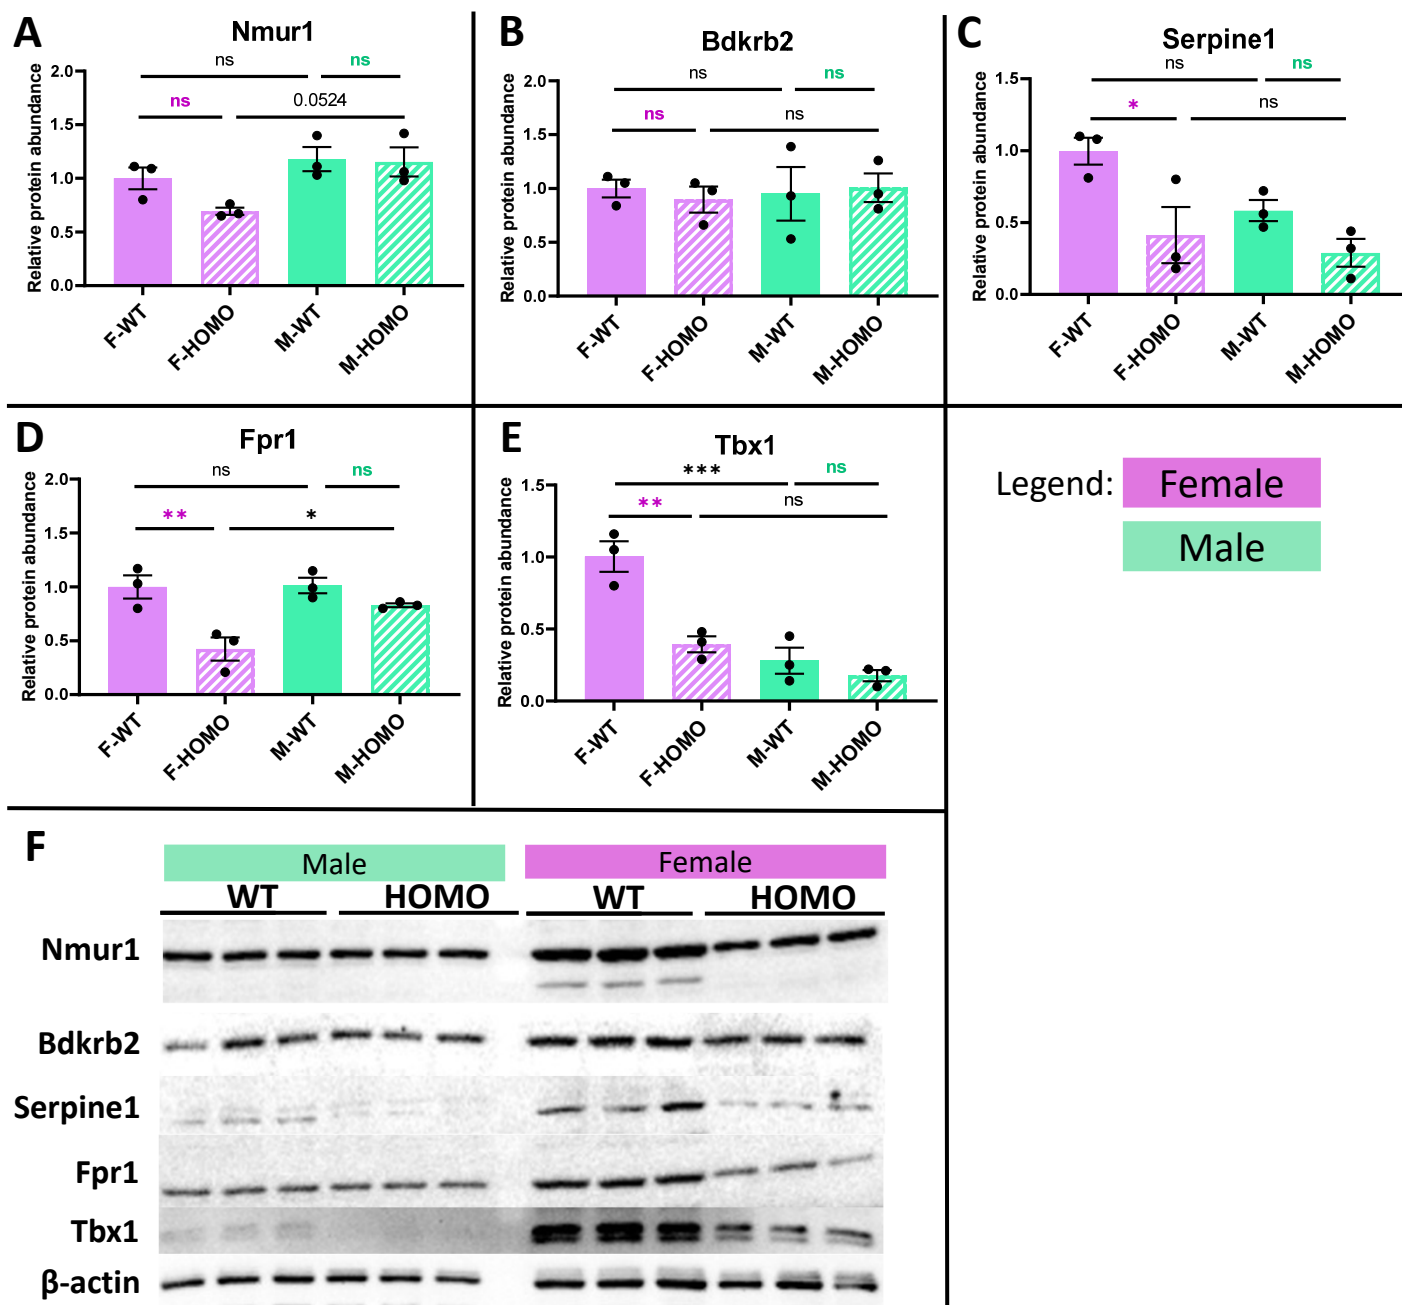

**Figure S13: Effect of hIGFBP5 on the secretion of Igfbp4, Serpine1 and Pappa2.** Conditioned media of cultured pFBs of hIGFBP5 HOMO and WT mice were analyzed by immunoblotting for selected proteins. Quantification of immunoblots (n=3) for the protein abundance of **(A)** Igfbp4, **(B)** Serpine1 and **(C)** Pappa2 were normalized to female WT. \*P < 0.05. \*\*P < 0.01. \*\*\*P < 0.001. \*\*\*\*P < 0.0001. ns: not significant. F: female (in purple), M: male (in green), WT: wild type, HOMO: hIGFBP5 homozygous mice. **(D)** Representative immunoblots showing protein abundance of Igfbp4, Serpine1 and Pappa2 in conditioned media of cultured pFBs from hIGFBP5 HOMO and WT mice. Ponceau S staining was used as loading control.

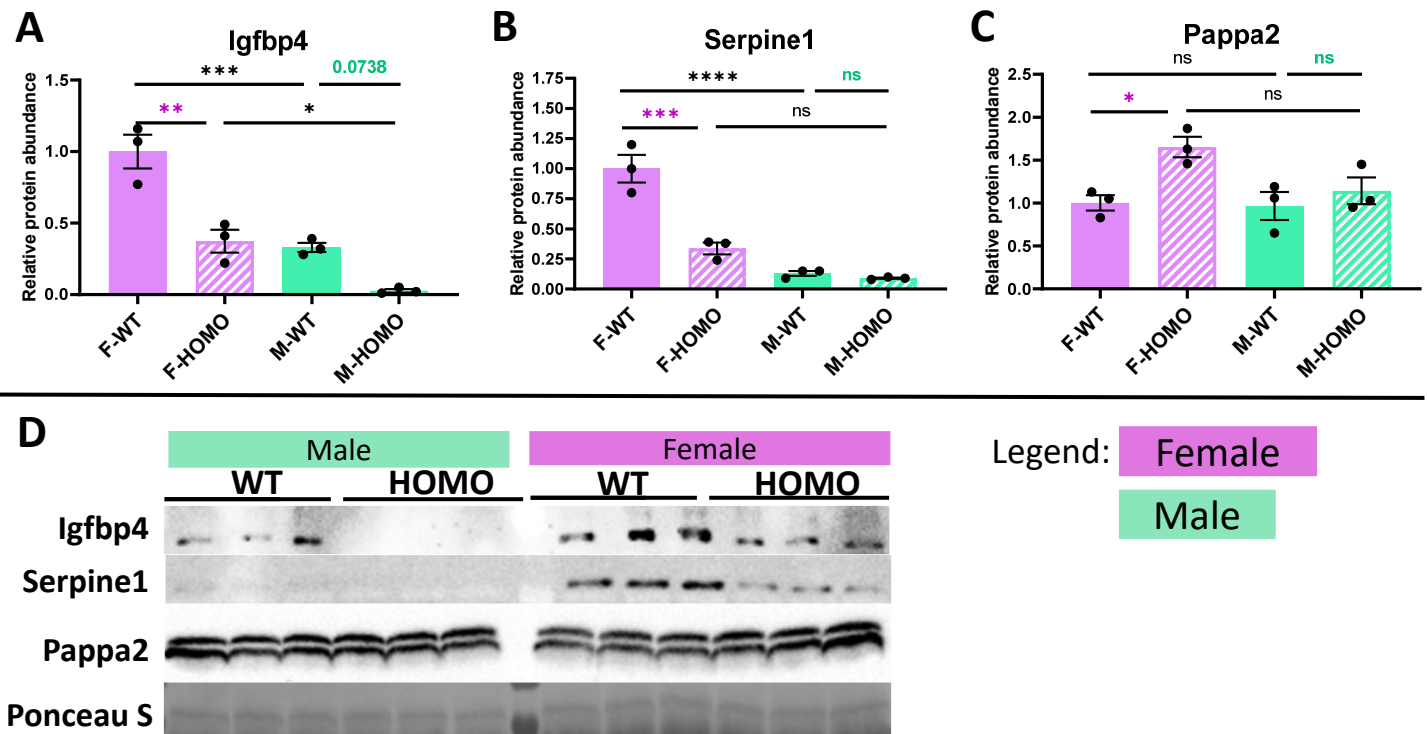

Supplement: s1 [file s1]
